# Supplementary material for: Genome-Wide Analysis of Gene Expression during Early Arabidopsis Flower Development
Source: PubMed Central journal article supplement (PMC1523247; doi:10.1371/journal.pgen.0020117), 2006-07-28
Supplement: pgen.0020117.st001.pdf [file pgen.0020117.st001.pdf]

**Table S1:** Known floral regulatory genes identified as differentially expressed in the experiment. Gene identifiers and gene names are listed. Literature describing the expression of the genes during flower development is referenced.

| Gene Identifier  | Name                                                | Reference  |
|------------------|-----------------------------------------------------|------------|
| <i>At4g18960</i> | <i>AGAMOUS</i>                                      | [1,2]      |
| <i>At4g24540</i> | <i>AGAMOUS-LIKE 24</i>                              | [3]        |
| <i>At4g36920</i> | <i>APETALA2</i>                                     | [4]        |
| <i>At3g54340</i> | <i>APETALA3</i>                                     | [5]        |
| <i>At1g26310</i> | <i>CAULIFLOWER</i>                                  | [6]        |
| <i>At2g27250</i> | <i>CLAVATA3</i>                                     | [7]        |
| <i>At1g69180</i> | <i>CRABS CLAW</i>                                   | [8,9]      |
| <i>At3g15170</i> | <i>CUP-SHAPED COTELYDON1</i>                        | [10]       |
| <i>At1g76420</i> | <i>CUP-SHAPED COTELYDON3</i>                        | [30]       |
| <i>At1g12980</i> | <i>ENHANCER OF SHOOT REGENERATION/ DORNROESCHEN</i> | [11]       |
| <i>At4g35900</i> | <i>FD</i>                                           | [13,14]    |
| <i>At2g45190</i> | <i>FILAMENTOUS FLOWER</i>                           | [15]       |
| <i>At5g24860</i> | <i>FLOWERING PROMOTING FACTOR1</i>                  | [16]       |
| <i>At1g68480</i> | <i>JAGGED</i>                                       | [17,18]    |
| <i>At5g14010</i> | <i>KNUCKLES</i>                                     | [19]       |
| <i>At5g61850</i> | <i>LEAFY</i>                                        | [20]       |
| <i>At4g27330</i> | <i>NOZZLE/SPOROCTELESS</i>                          | [21,22]    |
| <i>At1g13400</i> | <i>NUBBIN</i>                                       | [32]       |
| <i>At1g68640</i> | <i>PERIANTHIA</i>                                   | [23]       |
| <i>At5g20240</i> | <i>PISTILLATA</i>                                   | [24]       |
| <i>At3g59380</i> | <i>PLURIPETALA</i>                                  | [41]       |
| <i>At2g28610</i> | <i>PRESSED FLOWER</i>                               | [25]       |
| <i>At5g06070</i> | <i>RABBIT EARS</i>                                  | [26]       |
| <i>At1g24260</i> | <i>SEPALLATA3</i>                                   | [27]       |
| <i>At2g03710</i> | <i>SEPALLATA4</i>                                   | [28]       |
| <i>At2g42830</i> | <i>SHATTERPROOF2</i>                                | [29]       |
| <i>At2g22540</i> | <i>SHORT VEGETATIVE PHASE</i>                       | [31]       |
| <i>At5g35770</i> | <i>STERILE APETALA</i>                              | [12]       |
| <i>At3g23130</i> | <i>SUPERMAN</i>                                     | [33,34]    |
| <i>At2g45660</i> | <i>SUPPRESSOR OF OVEREXPRESSION OF CO 1</i>         | [35]       |
| <i>At5g03840</i> | <i>TERMINAL FLOWER 1</i>                            | [36]       |
| <i>At1g30950</i> | <i>UNUSUAL FLORAL ORGANS</i>                        | [37]       |
| <i>At2g17950</i> | <i>WUSCHEL</i>                                      | [38,39,40] |
| <i>At4g00180</i> | <i>YABBY3</i>                                       | [15]       |

## REFERENCES:

1. Ito T, Wellmer F, Yu H, Das P, Ito N, et al. (2004) The homeotic protein AGAMOUS controls microsporogenesis by regulation of SPOROCTELESS. *Nature* 430: 356-360.
2. Yanofsky MF, Ma H, Bowman JL, Drews GN, Feldmann KA, et al. (1990) The protein encoded by the Arabidopsis homeotic gene *agamous* resembles transcription factors. *Nature* 346: 35-39.
3. Yu H, Ito T, Wellmer F, Meyerowitz EM (2004) Repression of AGAMOUS-LIKE 24 is a crucial step in promoting flower development. *Nat Genet* 36: 157-161.
4. Jofuku KD, den Boer BG, Van Montagu M, Okamoto JK (1994) Control of Arabidopsis flower and seed development by the homeotic gene APETALA2. *Plant Cell* 6: 1211-1225.
5. Jack T, Brockman LL, Meyerowitz EM (1992) The homeotic gene APETALA3 of Arabidopsis thaliana encodes a MADS box and is expressed in petals and stamens. *Cell* 68: 683-697.
6. Kempin SA, Savidge B, Yanofsky MF (1995) Molecular basis of the cauliflower phenotype in Arabidopsis. *Science* 267: 522-525.
7. Fletcher JC, Brand U, Running MP, Simon R, Meyerowitz EM (1999) Signaling of cell fate decisions by CLAVATA3 in Arabidopsis shoot meristems. *Science* 283: 1911-1914.
8. Bowman JL, Smyth DR (1999) CRABS CLAW, a gene that regulates carpel and nectary development in Arabidopsis, encodes a novel protein with zinc finger and helix-loop-helix domains. *Development* 126: 2387-2396.
9. Schmid M, Uhlenhaut NH, Godard F, Demar M, Bressan R, et al. (2003) Dissection of floral induction pathways using global expression analysis. *Development* 130: 6001-6012.
10. Takada S, Hibara K, Ishida T, Tasaka M (2001) The CUP-SHAPED COTYLEDON1 gene of Arabidopsis regulates shoot apical meristem formation. *Development* 128: 1127-1135.
11. Kirch T, Simon R, Grunewald M, Werr W (2003) The DORNROSCHEN/ENHANCER OF SHOOT REGENERATION1 gene of Arabidopsis acts in the control of meristem cell fate and lateral organ development. *Plant Cell* 15: 694-705.
12. Byzova MV, Franken J, Aarts MG, de Almeida-Engler J, Engler G, et al. (1999) Arabidopsis STERILE APETALA, a multifunctional gene regulating inflorescence, flower, and ovule development. *Genes Dev* 13: 1002-1014.
13. Wigge PA, Kim MC, Jaeger KE, Busch W, Schmid M, et al. (2005) Integration of spatial and temporal information during floral induction in Arabidopsis. *Science* 309: 1056-1059.
14. Abe M, Kobayashi Y, Yamamoto S, Daimon Y, Yamaguchi A, et al. (2005) FD, a bZIP protein mediating signals from the floral pathway integrator FT at the shoot apex. *Science* 309: 1052-1056.

15. Siegfried KR, Eshed Y, Baum SF, Otsuga D, Drews GN, et al. (1999) Members of the YABBY gene family specify abaxial cell fate in Arabidopsis. *Development* 126: 4117-4128.
16. Kania T, Russenberger D, Peng S, Apel K, Melzer S (1997) FPF1 promotes flowering in Arabidopsis. *Plant Cell* 9: 1327-1338.
17. Dinneny JR, Yadegari R, Fischer RL, Yanofsky MF, Weigel D (2004) The role of JAGGED in shaping lateral organs. *Development* 131: 1101-1110.
18. Ohno CK, Reddy GV, Heisler MG, Meyerowitz EM (2004) The Arabidopsis JAGGED gene encodes a zinc finger protein that promotes leaf tissue development. *Development* 131: 1111-1122.
19. Payne T, Johnson SD, Koltunow AM (2004) KNUCKLES (KNU) encodes a C2H2 zinc-finger protein that regulates development of basal pattern elements of the Arabidopsis gynoecium. *Development* 131: 3737-3749.
20. Weigel D, Alvarez J, Smyth DR, Yanofsky MF, Meyerowitz EM (1992) LEAFY controls floral meristem identity in Arabidopsis. *Cell* 69: 843-859.
21. Schiefthaler U, Balasubramanian S, Sieber P, Chevalier D, Wisman E, et al. (1999) Molecular analysis of NOZZLE, a gene involved in pattern formation and early sporogenesis during sex organ development in Arabidopsis thaliana. *Proc Natl Acad Sci U S A* 96: 11664-11669.
22. Yang WC, Ye D, Xu J, Sundaresan V (1999) The SPOROCTELESS gene of Arabidopsis is required for initiation of sporogenesis and encodes a novel nuclear protein. *Genes Dev* 13: 2108-2117.
23. Chuang CF, Running MP, Williams RW, Meyerowitz EM (1999) The PERIANTHIA gene encodes a bZIP protein involved in the determination of floral organ number in Arabidopsis thaliana. *Genes Dev* 13: 334-344.
24. Goto K, Meyerowitz EM (1994) Function and regulation of the Arabidopsis floral homeotic gene PISTILLATA. *Genes Dev* 8: 1548-1560.
25. Matsumoto N, Okada K (2001) A homeobox gene, PRESSED FLOWER, regulates lateral axis-dependent development of Arabidopsis flowers. *Genes Dev* 15: 3355-3364.
26. Takeda S, Matsumoto N, Okada K (2004) RABBIT EARS, encoding a SUPERMAN-like zinc finger protein, regulates petal development in Arabidopsis thaliana. *Development* 131: 425-434.
27. Mandel MA, Yanofsky M (1998) The Arabidopsis AGL9 MADS-box gene is expressed in young flower promordia. *Sex Plant Reprod* 11: 22-28.
28. Ditta G, Pinyopich A, Robles P, Pelaz S, Yanofsky MF (2004) The SEP4 gene of Arabidopsis thaliana functions in floral organ and meristem identity. *Curr Biol* 14: 1935-1940.
29. Savidge B, Rounsley SD, Yanofsky MF (1995) Temporal relationship between the transcription of two Arabidopsis MADS box genes and the floral organ identity genes. *Plant Cell* 7: 721-733.
30. Vroemen CW, Mordhorst AP, Albrecht C, Kwaaitaal MA, de Vries SC (2003) The CUP-SHAPED COTYLEDON3 gene is required for boundary and shoot meristem formation in Arabidopsis. *Plant Cell* 15: 1563-1577.

31. Hartmann U, Hohmann S, Nettesheim K, Wisman E, Saedler H, et al. (2000) Molecular cloning of SVP: a negative regulator of the floral transition in Arabidopsis. *Plant J* 21: 351-360.
32. Dinneny JR, Weigel D, Yanofsky MF (2006) NUBBIN and JAGGED define stamen and carpel shape in Arabidopsis. *Development*.
33. Ito T, Sakai H, Meyerowitz EM (2003) Whorl-specific expression of the SUPERMAN gene of Arabidopsis is mediated by cis elements in the transcribed region. *Curr Biol* 13: 1524-1530.
34. Sakai H, Medrano LJ, Meyerowitz EM (1995) Role of SUPERMAN in maintaining Arabidopsis floral whorl boundaries. *Nature* 378: 199-203.
35. Borner R, Kampmann G, Chandler J, Gleissner R, Wisman E, et al. (2000) A MADS domain gene involved in the transition to flowering in Arabidopsis. *Plant J* 24: 591-599.
36. Bradley D, Ratcliffe O, Vincent C, Carpenter R, Coen E (1997) Inflorescence commitment and architecture in Arabidopsis. *Science* 275: 80-83.
37. Lee I, Wolfe DS, Nilsson O, Weigel D (1997) A LEAFY co-regulator encoded by UNUSUAL FLORAL ORGANS. *Curr Biol* 7: 95-104.
38. Alvarez J, Smyth DR (1999) CRABS CLAW and SPATULA, two Arabidopsis genes that control carpel development in parallel with AGAMOUS. *Development* 126: 2377-2386.
39. Gross-Hardt R, Lenhard M, Laux T (2002) WUSCHEL signaling functions in interregional communication during Arabidopsis ovule development. *Genes Dev* 16: 1129-1138.
40. Wellmer F, Riechmann JL, Alves-Ferreira M, Meyerowitz EM (2004) Genome-wide analysis of spatial gene expression in Arabidopsis flowers. *Plant Cell* 16: 1314-1326.
41. Running MP, Lavy M, Sternberg H, Galichet A, Gruissem W, et al. (2004) Enlarged meristems and delayed growth in *plp* mutants result from lack of CaaX prenyltransferases. *Proc Natl Acad Sci U S A* 101: 7815-7820.
