# Supplementary material for: Genome-Wide Analysis of Gene Expression during Early Arabidopsis Flower Development
Source: PLOS journal article supplement (doi:10.1371/journal.pgen.0020117), 2006-07-24

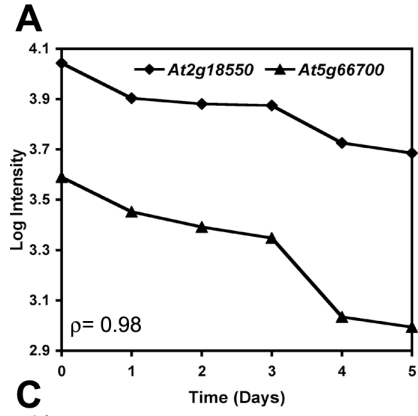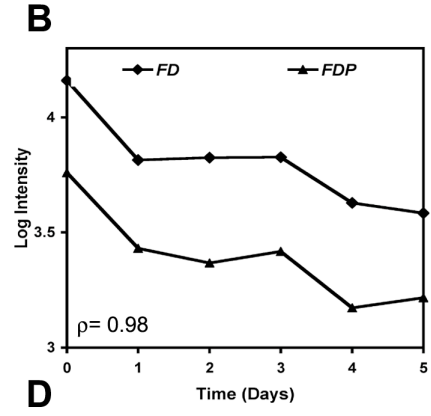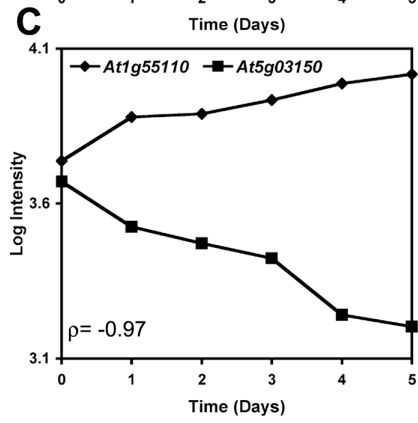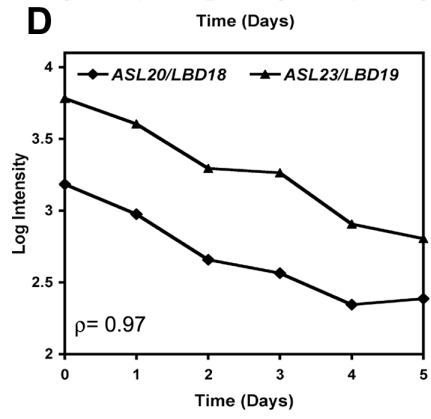

Supplement: S5 (10.1371/journal.pgen.0020117.s005) [file journal.pgen.0020117.s005]
