# Supplementary material for: Genome-Wide Analysis of Gene Expression during Early Arabidopsis Flower Development
Source: PLoS Genet. 2006 Jul 28;2(7):e117. doi: 10.1371/journal.pgen.0020117 (PMC1523247; doi:10.1371/journal.pgen.0020117)
Supplement: Table S2 — Gene identifiers and gene descriptions are shown. Gene descriptions were derived from various sources, including information from TAIR. The assignment of the individual genes to the clusters (A–E) of co-expressed genes shown in Figure 3C is indicated in the column “Cluster”. Fold change values and adjusted p values (“Holm”) for ratios r1-r5, as well as normalized signal intensities for the different time points (0–5 d) are shown. (848 KB XLS) [file pgen.0020117.st002.xls]

## Sheet: Signature Genes
Cluster	Gene ID	Gene Description	Fold Change R1	Holm R1	Fold Change R2	Holm R2	Fold Change R3	Holm R3	Fold Change R4	Holm R4	Fold Change R5	Holm R5	Intensity 0d	Intensity 1d	Intensity 2d	Intensity 3d	Intensity 4d	Intensity 5d
E	At1g01030	^ ^ ^ TF ^ABI3/VP1^ ^DNA-binding protein, putative similar to DNA-binding proteins from [Arabidopsis thaliana] RAV1 GI:3868857, RAV2 GI:3868859; contains Pfam profile PF02362: B3 DNA binding domain^	1.12251	1	1.31974	1	2.58314	1	2.60964	1.30864e-15	1.89353	1.64226e-07	61.5173	67.4949	85.0791	262.959	600.842	1107.97
B	At1g01140	^CBL-interacting protein kinase 9^SNF1-related Protein Kinase (SnRK) ;AtCIPKs;protein serine/threonine kinase activity^ ^CBL-interacting protein kinase 9 (CIPK9) identical to CBL-interacting protein kinase 9 [Arabidopsis thaliana] gi|13249117|gb|AAK16684; contains Pfam profiles PF00069: Protein kinase domain and PF03822: NAF domain; identical to cDNA CBL-interacting protein kinase 9 (CIPK9) GI:13…	-1.60973	0.00186986	-1.09387	1	-1.1239	1	1.07334	1	1.27456	1	12958.5	11344.7	9918.28	7437.92	7811.85	7429.35
B	At1g01430	^ ^molecular_function unknown^ ^expressed protein similar to hypothetical protein GB:CAB80917 GI:7267605 from [Arabidopsis thaliana]^	1.10112	1	-1.06839	1	1.11418	1	-1.01983	1	1.37005	0.0303428	1136.8	1283.18	1093.96	1092.8	1103.98	1312.02
B	At1g01720	^ ^ANAC002^ TF ^NAC^ ^no apical meristem (NAM) family protein contains Pfam PF02365: No apical meristem (NAM) domain; similar to NAC domain protein NAM GB:AAD17313 GI:4325282 from [Arabidopsis thaliana]^	1.02207	1	-1.07032	1	-1.32027	1.73027e-34	-1.19566	1	1.15141	1	11671.8	12662.6	12376.6	10422.2	11161.1	8453.17
E	At1g02065	^SPL8^SPL8^ TF ^SBP (Zn)^ ^squamosa promoter-binding protein-like 8 (SPL8) identical to squamosa promoter binding protein-like 8 [Arabidopsis thaliana] GI:5931679; contains Pfam profile PF03110: SBP domain^	-1.68242	0.000118209	1.37407	1	1.35608	1	-1.09269	1	1.42361	1	4521.18	2655.91	3214.19	4372.64	4030.47	6139.66
D	At1g02190	^ ^Lipid Metabolism Gene Families;mitochondrion^Lipid transfer protein; glossy1 homolog family^CER1 protein, putative similar to CER1 GI:1199467 and maize gl1 homolog (glossy1 locus) GI:1209703 from [Arabidopsis thaliana]^	2.15621	1	1.36307	1	1.63709	3.94257e-05	1.28562	1	-1.42362	1	493.496	930.85	1783.57	2568.55	2755.6	2098.78
E	At1g02340	^LONG HYPOCOTYL IN FAR-RED1^BHLH026^ TF ^bHLH^bHLH^long hypocotyl in far-red 1 (HFR1) / reduced phytochrome signaling (REP1) / basic helix-loop-helix FBI1 protein (FBI1) / reduced sensitivity to far-red light (RSF1) / bHLH protein 26 (BHLH026) (BHLH26) identical to SP|Q9FE22 Long hypocotyl in far-red 1 (bHLH-like protein HFR1) (Reduced phytochrome signaling) (Basic helix-loop-helix FBI1 protein) …	-1.51598	0.25998	1.17116	1	1.47883	1	1.36882	1	1.97078	2.79899e-07	670.828	501.606	701.509	1007.96	1384.26	2085.99
C	At1g02610	^ ^electron transporter activity^ ^zinc finger (C3HC4-type RING finger) family protein contains Pfam profile: PF00097 zinc finger, C3HC4 type (RING finger)^	4.68459	4.46374e-34	1.26619	1	-1.07351	1	1.12911	1	1.00114	1	40.8187	168.168	210.914	250.993	224.086	252.078
E	At1g02640	^BETA-XYLOSIDASE 2^Glycoside Hydrolase Family 3;endomembrane system^ ^glycosyl hydrolase family 3 protein similar to beta-xylosidase GB:Z84377 GI:2102655 from [Aspergillus niger]^	-1.67115	2.13116e-06	-1.11455	1	1.00976	1	1.08018	1	1.2892	1	5044.55	3495.52	3837.1	4444.7	4635.41	5064.47
E	At1g02850	^ ^glucosidase;Glycoside Hydrolase Family 1;Glycoside Hydrolase Gene Families;endomembrane system^Glycoside Hydrolase Family 28^glycosyl hydrolase family 1 protein contains Pfam PF00232 : Glycosyl hydrolase family 1 domain; TIGRFAM TIGR01233: 6-phospho-beta-galactosidase; similar to hydroxyisourate hydrolase (GI:19569603) [Glycine max]^	-1.1557	1	-1.38775	1	1.34971	1	1.78421	2.24647e-05	1.55378	1	3201.22	2587.53	1607.3	1920.07	2903.74	4181.64
E	At1g02930	^ATGSTF3^ ^ ^glutathione S-transferase, putative similar to glutathione S-transferase GI:860955 from [Hyoscyamus muticus]^	-2.18426	0.062688	-1.03472	1	1.43126	1	2.94768	2.80655e-24	1.95689	1	1682.05	844.963	877.329	1358.31	4254.16	7553.97
E	At1g02940	^ ^ ^ ^glutathione S-transferase, putative similar to glutathione S-transferase GI:860955 from [Hyoscyamus muticus]^	-1.10144	1	-1.07444	1	1.02824	1	1.41938	1	2.15335	0.00231089	64.5666	53.857	62.687	66.632	133.918	315.994
B	At1g03040	^ ^BHLH007^ TF ^bHLH^bHLH^basic helix-loop-helix (bHLH) family protein component of the pyruvate dehydrogenase complex E3, contains PF|00010 helix-loop-helix DNA-binding domain. ESTs gb|T45640 and gb|T22783 come from this gene^	1.07199	1	1.21213	1	-1.13628	1	-1.36083	0.00399244	1.1736	1	6002.75	6197.98	7515.32	6590.64	5267.15	6356.9
A	At1g03170	^ ^ ^ ^expressed protein ^	-1.79036	0.0140967	-1.91089	0.0256919	1.12632	1	-1.10388	1	-1.16233	1	9954.61	6336.43	4110.28	4561.18	4506.09	3286.29
B	At1g03180	^ ^ ^ ^hypothetical protein ^	1.05578	1	1.12885	1	1.11562	1	1.10111	1	-1.51438	0.00471219	1901.59	2274.73	2154.66	2062.19	1869.98	1516.49
B	At1g03650	^ ^N-acetyltransferase activity^ ^GCN5-related N-acetyltransferase (GNAT) family protein low similarity to SP|P07347 N-terminal acetyltransferase complex ARD1 subunit (Arrest-defective protein 1) {Saccharomyces cerevisiae}; contains Pfam profile PF00583: acetyltransferase, GNAT family^	1.17827	1	-1.05112	1	-1.02855	1	1.05575	1	-1.30003	0.0123985	1374.98	1609.02	1500.72	1443.01	1405.18	1200.42
E	At1g03720	^ ^proteolysis and peptidolysis^ ^cathepsin-related contains weak similarity to Cathepsin L precursor (EC 3.4.22.15) (Major excreted protein) (MEP) (Cyclic protein-2) (CP-2) (Swiss-Prot:P07154) [Rattus norvegicus]^	-1.57409	1	-1.19034	1	2.00533	0.000574841	1.45133	1	1.05536	1	486.255	323.913	286.842	533.36	811.628	796.599
B	At1g03820	^ ^endomembrane system^ ^expressed protein similar to arabinogalactan-protein; AGP (GI:1087015) {Pyrus communis}; similar to Protein E6. (SP:Q01197) {Gossypium hirsutum}^	-1.36975	1	1.32198	1	1.01968	1	-1.41369	0.000686065	-1.41779	1	1392.89	1176.25	1417.82	1348.96	841.693	683.966
E	At1g03940	^ ^ ^ ^transferase family protein similar to anthocyanin 5-aromatic acyltransferase from Gentiana triflora GI:4185599, malonyl CoA:anthocyanin 5-O-glucoside-6'''-O-malonyltransferase from Perilla frutescens GI:17980232, Salvia splendens GI:17980234; contains Pfam profile PF02458 transferase family^	-2.52136	5.08423e-12	1.01166	1	1.48032	1	2.42867	2.14035e-21	1.97316	0.183883	388.533	205.997	238.494	470.546	1295.53	2126.58
B	At1g04010	^ ^Acyl Lipid Metabolism;endomembrane system^Phosphatidylcholine : Diacylglycerol Acyltransferase^lecithin:cholesterol acyltransferase family protein / LACT family protein weak similarity to SP|P40345 Phospholipid:diacylglycerol acyltransferase (EC 2.3.1.158) (PDAT) {Saccharomyces cerevisiae}; contains Pfam profile PF02450: Lecithin:cholesterol acyltransferase (phosphatidylcholine-sterol acyltran…	-1.01096	1	1.24582	1	-1.32772	1	-1.34335	1	1.65887	4.3173e-07	862.233	809.348	816.448	575.899	531.932	636.647
E	At1g04040	^ ^endomembrane system^ ^acid phosphatase class B family protein similar to SP|P15490 STEM 28 kDa glycoprotein precursor (Vegetative storage protein A) {Glycine max}, acid phosphatase [Glycine max] GI:3341443; contains Pfam profile PF03767: HAD superfamily (subfamily IIIB) phosphatase; supporting cDNA gi|13926197|gb|AF370572.1|AF370572^	-1.19312	1	1.21354	1	1.14126	1	1.05056	1	1.60846	0.00944158	416.459	295.887	301.271	316.298	442.576	569.36
E	At1g04110	^STOMATAL DENSITY AND DISTRIBUTION^subtilases (subtilisin ? like serine proteases) ;regulation of cell proliferation^ ^subtilase family protein contains similarity to subtilisin-like protease GI:3687307 from [Lycopersicon esculentum]^	-1.03428	1	1.16375	1	-1.00024	1	1.48477	1	1.96673	1.77649e-06	109.191	100.744	138.14	123.524	231.243	554.036
D	At1g04240	^SHORT HYPOCOTYL2^IAA3^ TF ^Aux/IAA^ ^auxin-responsive protein / indoleacetic acid-induced protein 3 (IAA3) identical to SP|Q38822 Auxin-responsive protein IAA3 (Indoleacetic acid-induced protein 3) {Arabidopsis thaliana}; EST gb|T04296 comes from this gene^	1.777	0.000505709	1.9496	5.42375e-05	1.19597	1	1.52038	0.26246	-1.13414	1	262.385	612.323	970.076	1235.71	1815.15	1748.22
D	At1g04250	^AXR3^IAA17^ TF ^Aux/IAA^ ^auxin-responsive protein / indoleacetic acid-induced protein 17 (IAA17) Identical to SP|P93830 Auxin-responsive protein IAA17 (Indoleacetic acid-induced protein 17) {Arabidopsis thaliana}; ESTs gb|H36782 and gb|F14074 come from this gene^	-1.29789	1	1.66166	0.000393058	1.39945	1	1.05621	1	-1.23124	1	2408.48	2514.4	3889.34	5113.33	5360.95	3997.6
A	At1g04360	^ ^C3H zinc finger family^ ^zinc finger (C3HC4-type RING finger) family protein contains Pfam profile: PF00097 zinc finger, C3HC4 type (RING finger)^	-1.52308	0.00538146	1.16583	1	1.06955	1	-1.10974	1	1.01537	1	577.892	411.107	416.78	443.414	425.367	414.083
B	At1g04650	^ ^ ^ ^hypothetical protein ^	1.10424	1	-1.01475	1	-1.27778	0.0108393	1.11338	1	-1.03638	1	1443.52	1672.2	1767.89	1348.87	1355.99	1242.77
D	At1g04900	^ ^mitochondrion^ ^expressed protein contains Pfam PF02636: Uncharacterized ACR, COG1565^	-1.02356	1	-1.33172	0.00207106	1.02773	1	1.14589	1	-1.21892	1	401.39	428.076	428.606	3454.91	4474.54	3466.35
E	At1g04920	^ ^Glycosyltransferase Family 4;Glycosyltransferase Gene Families;glycosyltransferase;sucrose biosynthesis^Glycosyltransferase- Family 4;SUCROSE-PHOSPHATE SYNTHASE^sucrose-phosphate synthase, putative similar to GB:Y11795 from [Craterostigma plantagineum]^	1.18631	1	-1.02342	1	1.14586	1	2.03251	3.66901e-06	1.57526	0.0133227	84.5436	99.2003	99.6853	122.355	208.17	371.623
A	At1g05370	^ ^ ^ ^expressed protein ^	-2.14191	1.09035e-10	-1.41944	1	-1.12758	1	-1.72088	1	1.96102	1	1047.72	586.664	436.084	339.682	296.675	567.044
D	At1g05480	^ ^Orphan family (SNF2/ISWI);nucleic acid binding activity^ ^SNF2 domain-containing protein / helicase domain-containing protein low similarity to SP|Q9U7E0 Transcriptional regulator ATRX homolog {Caenorhabditis elegans}; contains PFam profiles PF00271: Helicase conserved C-terminal domain, PF00176: SNF2 family N-terminal domain^	2.69238	1.4421e-11	1.80857	0.0257702	1.45935	1	1.44516	0.000738932	1.0837	1	319.415	716.943	1148.55	1598.27	2413.69	2618.82
E	At1g05540	^ ^mitochondrion^ ^expressed protein contains Pfam profile PF03478: Protein of unknown function (DUF295)^	1.30527	1	1.89122	1	2.10704	0.0509107	3.3598	1.58679e-07	1.45852	1	59.1784	70.7108	124.089	393.215	1209.78	1906
A	At1g05760	^RESTRICTED TEV MOVEMENT 1^sugar binding activity^ ^jacalin lectin family protein (RTM1) identical to gi:6503088 (GB:AAF14583) from [Arabidopsis thaliana] (Proc. Natl. Acad. Sci. U.S.A. 97 (1), 489-494 (2000)); contains Pfam profile PF01419 jacalin-like lectin domain^	-1.58227	7.41219e-10	-1.25017	1	-1.15228	1	-1.28462	1	-1.19586	1	688.43	511.543	483.222	566.391	431.597	315.827
A	At1g06030	^ ^fructokinase activity;sucrose degradation 1;sucrose biosynthesis^FRUCTOKINASE^pfkB-type carbohydrate kinase family protein contains Pfam profile: PF00294 pfkB family carbohydrate kinase^	-1.413	6.20471e-05	-1.24349	1	1.13494	1	-1.251	1	-1.13953	1	1570.56	979.609	947.912	1182.26	822.412	616.861
A	At1g06350	^ ^Acyl Lipid Metabolism;Lipid Metabolism Gene Families;endoplasmic reticulum^Acyl-CoA Desaturase-like;Delta 9 desaturase family^fatty acid desaturase family protein similar to delta 9 acyl-lipid desaturase (ADS1) GI:2970034 from [Arabidopsis thaliana]^	-2.84324	3.89557e-21	-1.30521	1	1.51979	0.52922	-1.23271	1	1.37356	1	614.08	375.061	352.143	433.887	381.345	429.323
E	At1g06360	^ ^Acyl Lipid Metabolism;Lipid Metabolism Gene Families;endoplasmic reticulum^Acyl-CoA Desaturase-like;Delta 9 desaturase family^fatty acid desaturase family protein similar to delta 9 acyl-lipid desaturase (ADS1) GI:2970034 from [Arabidopsis thaliana]^	-2.96025	3.94343e-06	1.3907	1	1.41037	1	1.43835	1	3.14821	3.52585e-11	793.016	351.78	629.866	1192.53	1311.15	2608.69
B	At1g06390	^GSK3/SHAGGY-LIKE PROTEIN KINASE 1^Abiotic stress--salt and drought;GSK3/Shaggy Like Protein Kinase ;glycogen synthase kinase 3 activity^Overexpression leads to enhanced salt and drought tolerance; induces salt-stress-responsive genes and anthocyanin accumulation^shaggy-related protein kinase iota / ASK-iota (ASK9) (GSK1) identical to shaggy-related protein kinase iota (ASK-iota) [Arabidopsis tha…	1.03353	1	-1.36598	1	-1.13081	1	-1.30597	1	1.9903	0.000485774	7325.39	7980.51	6946.71	5201.46	5666.05	7378.32
D	At1g06420	^ ^ ^ ^expressed protein ; expression supported by MPSS^	1.76173	0.000173989	1.06641	1	-1.17937	1	1.17324	1	-1.07564	1	873.333	1567.94	1974.5	2361.22	3200.53	3000.7
C	At1g06520	^ ^Acyl Lipid Metabolism;mitochondrion^Mitochondrial Glycerol-Phosphate Acyltransferase^phospholipid/glycerol acyltransferase family protein contains Pfam profile PF01553: Acyltransferase^	2.37935	5.68869e-06	-1.08826	1	1.06027	1	1.2827	1	-1.11069	1	82.5971	192.836	222.863	189.476	221.85	157.816
E	At1g06640	^ ^ ^ ^2-oxoglutarate-dependent dioxygenase, putative similar to 2A6 (GI:599622) and tomato ethylene synthesis regulatory protein E8 (SP|P10967); contains Pfam profile: PF00671 Iro scorbate oxidoreductase family^	-1.36547	1	1.05991	1	1.14107	1	2.67048	0	2.24873	0.26238	241.645	205.416	263.848	286.215	578.232	934.637
A	At1g07240	^ ^Glycosyl transferases;Glycosyltransferase Gene Families;glycosyltransferase^GT family 1;Glycosyltransferase- Family 1^UDP-glucoronosyl/UDP-glucosyl transferase family protein contains Pfam profile: PF00201 UDP-glucoronosyl and UDP-glucosyl transferase^	-1.84083	1.06297e-05	-1.19984	1	1.07156	1	-1.13533	1	-1.2545	1	2247.3	1474.23	988	925.709	777.34	766.761
B	At1g07260	^ ^Glycosyl transferases;Glycosyltransferase Family 1;Glycosyltransferase Gene Families;glycosyltransferase^GT family 1;Glycosyltransferase- Family 1^UDP-glucoronosyl/UDP-glucosyl transferase family protein contains Pfam profile: PF00201 UDP-glucoronosyl and UDP-glucosyl transferase^	-1.06988	1	-1.13656	1	-1.28643	1	-1.55068	1.03927e-08	-1.04585	1	1803.02	1773.6	1403.11	1106.9	673.553	583.302
C	At1g07270	^ ^chloroplast^ ^cell division control protein CDC6b, putative (CDC6b) identical to CDC6b protein (GI:18056482) {Arabidopsis thaliana}; contains Prosite PS00017: ATP/GTP-binding site motif A (P-loop); identical to cDNA CDC6b GI:18056481^	1.00907	1	1.18656	1	-1.67866	0.000198379	1.19971	1	1.45588	1	222.907	318.001	432.772	366.495	445.432	460.89
E	At1g07430	^ ^PP2C (Protein Phosphatase 2C) Phosphatases;protein amino acid dephosphorylation^ ^protein phosphatase 2C, putative / PP2C, putative similar to GB:CAB90633 from [Fagus sylvatica]^	1.35035	1	-1.10441	1	-1.21574	1	1.24869	1	2.00955	1.35611e-09	149.786	207.22	166.89	164.629	227.564	459.821
E	At1g07473	^ ^chloroplast^ ^hypothetical protein ^	-1.6162	1	1.03465	1	1.1872	1	-1.11687	1	2.71748	0.0295534	120.795	80.7582	87.2682	109.505	87.9473	291.734
C	At1g07500	^ ^ ^ ^expressed protein ; expression supported by MPSS^	1.45917	3.48761e-12	1.28088	1	-1.02262	1	-1.37907	0.52438	-1.54609	0.191216	641.544	890.569	1157.43	1014.8	597.381	404.582
A	At1g07600	^ATMT-2^metal ion binding activity^ ^metallothionein-like protein 1A (MT-1A) (MT-Q) (MT-2) identical to Metallothionein-like protein 1A (MT-1A) (MT-Q) (MT-2) SP:P43392 from (Arabidopsis thaliana)^	-1.36973	1	-2.1416	2.13667e-09	-1.09871	1	-1.1544	1	-1.40841	1	4345.57	2917.23	1954.3	1990.27	1909.51	1968.11
B	At1g07750	^ ^ ^ ^cupin family protein similar to legumin (11S-globulin) from Ginkgo biloba [GI:949869], 11S globulin from Avena sativa [GI:472867]^	1.01454	1	1.0618	1	-1.02704	1	-1.50202	0.000267791	-1.00409	1	2503.56	2759.58	2428.28	2487.8	1740.72	1704
B	At1g08180	^ ^ ^ ^expressed protein ^	1.41193	2.63926e-06	-1.42521	0.26297	1.16649	1	1.2279	1	1.04629	1	2000.61	2611.6	2192.93	2403.09	2490.5	2012.71
D	At1g08310	^ ^enzyme activity^ ^esterase/lipase/thioesterase family protein contains Interpro entry IPR000379^	1.14036	1	2.81496	2.76588e-05	1.35095	1	1.50241	3.0798e-05	1.10624	1	117.698	147.871	486.225	477.705	597.922	555.574
E	At1g08320	^ ^AtbZIP21^ TF ^bZIP^ ^bZIP family transcription factor contains Pfam profile: PF00170 bZIP transcription factor^	-1.09581	1	1.10856	1	1.26588	1	1.14353	1	1.62444	1.95861e-08	556.667	519.99	650.944	948.779	1306.19	1933.28
B	At1g08410	^ ^ATP binding activity^ ^GTP-binding family protein contains Pfam domain, PF01926: GTPase of unknown function^	-1.03034	1	1.79715	2.6863e-05	-1.41118	1	-1.39608	1	1.23802	1	895.843	940.037	1152.22	926.187	837.579	975.096
D	At1g08650	^ ^Phosphoenolpyruvate Carboxylase Kinase (PPCK) ;protein kinase activity^ ^phosphoenolpyruvate carboxylase kinase identical to phosphoenolpyruvate carboxylase kinase [Arabidopsis thaliana] gi|6318613|gb|AAF06968; contains protein kinase domain, Pfam:PF00069^	1.08122	1	1.69261	9.70533e-09	1.452	1	-1.12611	1	-1.14507	1	1676.23	2059.29	3417.76	3306.07	3144.39	3874.69
A	At1g08930	^ERD6^C2H2 zinc finger family;SUGAR TRANSPORTERS;MFS(Major Facilitator);Organic Solute Cotransporters;carbohydrate transporter activity^MONOSACCHARIDE-H+ SYMPORTERS;Putative sugar transporter family^early-responsive to dehydration stress protein (ERD6) / sugar transporter family protein identical to ERD6 protein {Arabidopsis thaliana} GI:3123712; contains Pfam profile PF00083: major facilitator s…	-2.11778	2.30081e-07	-1.62759	0.26297	1.08349	1	-1.10323	1	1.07427	1	2029.56	882.383	425.97	496.644	461.242	562.381
C	At1g08960	^ATCAX11^CaCA( Ca2+:Cation Antiporter);Antiporters;calcium:sodium antiporter activity^Potassium-dependent sodium-calcium exchanger like-family^cation exchanger, putative (CAX11) similar to sodium/calcium exchanger protein [Mus musculus] gi|13925661|gb|AAK49407; Ca2+:Cation Antiporter (CaCA) Family member PMID:11500563^	-1.04129	1	1.23297	1	1.56035	0.0013432	1.16392	1	1.17928	1	810.83	842.751	1019.56	1137.48	1120.52	993.263
A	At1g09310	^ ^ ^ ^expressed protein contains Pfam profile PF04398: Protein of unknown function, DUF538^	-2.63352	2.79804e-14	1.07191	1	1.94559	1.50787e-08	-1.02208	1	-1.09305	1	12038.5	5803.21	5556.34	7128.97	5367.79	4553.15
E	At1g09340	^ ^ ^ ^expressed protein ^	1.122	1	-1.02999	1	1.08594	1	1.28709	1	1.74881	2.65255e-06	9663.01	10422	10679.4	11274.5	10147.8	13704.8
A	At1g09390	^ ^lipase activity;glycerol biosynthesis^LIPASE^GDSL-motif lipase/hydrolase family protein Similar to early nodulin ENOD8 [Medicago sativa] GI:304037, lanatoside 15'-O-acetylesterase [Digitalis lanata] GI:3688284, elicitor-induced glycoprotein iEP4 [Daucus carota] GI:1911765; contains InterPro Entry IPR001087 Lipolytic enzyme, G-D-S-L family^	-1.95318	1.12754e-10	-1.21975	1	1.09745	1	-1.43699	0.00275111	1.2922	1	1061.4	611.446	592.792	703.402	495.894	558.85
B	At1g09415	^ ^ ^ ^NPR1/NIM1-interacting protein 3 (NIMIN-3) identical to NIMIN-3 protein [Arabidopsis thaliana] GI:12057158, cDNA NIMIN-3 protein (nimin-3 gene)GI:12057157^	-1.03014	1	-1.44279	6.45366e-09	1.0412	1	-1.21163	1	1.13031	1	4181.36	4821.23	3317.05	3121.87	2889.79	2916.19
D	At1g09460	^ ^endomembrane system^ ^glucan endo-1,3-beta-glucosidase-related similar to glucan endo-1,3-beta-glucosidase precursor SP:P52409 from [Triticum aestivum]^	-1.08569	1	1.02936	1	1.49536	0.0344903	1.09508	1	-1.0592	1	464.952	428.11	496.815	674.354	634.557	700.233
C	At1g09570	^ELONGATED HYPOCOTYL 8^Protein Kinase (Other);Histidine Kinase;cytoplasm^ ^phytochrome A (PHYA) identical to SP|P14712 Phytochrome A {Arabidopsis thaliana}^	1.81687	5.3106e-09	1.21446	1	-1.15313	1	1.01777	1	-1.06586	1	4472.3	7722.22	9952.37	8639.5	8109.23	7005.55
A	At1g09750	^ ^endomembrane system^ ^chloroplast nucleoid DNA-binding protein-related contains Pfam profile PF00026: Eukaryotic aspartyl protease;b similar to CND41, chloroplast nucleoid DNA binding protein (GI:2541876) [Nicotiana tabacum]^	-2.08293	2.29105e-05	-1.14544	1	1.4502	0.0781927	1.46985	1	1.22049	1	12811.7	6792.8	6799.74	7861.68	8806.39	11026
A	At1g09812	^ ^ ^ ^expressed protein ; expression supported by MPSS^	-1.75916	4.12331e-11	-1.2448	1	-1.13605	1	-1.40691	1	-1.01371	1	2677.25	1908.57	1413.75	1161.04	837.02	783.613
A	At1g09970	^ ^LRR XI & LRR XII ;Receptor kinase-like protein family;kinase activity^ ^leucine-rich repeat transmembrane protein kinase, putative Similar to A. thaliana receptor-like protein kinase (gb|RLK5_ARATH). ESTs gb|ATTS0475,gb|ATTS4362 come from this gene isoform contains a TG acceptor site at intron.^	-1.74063	1	-1.75084	0.00788955	-1.46743	1	-1.16513	1	1.38583	1	5335.23	4393.92	3916.4	3185.13	3384.5	3541.6
A	At1g09990	AT1G09990_1 unknown protein	-1.31301	1	1.20666	1	-2.70725	0.019807	-1.15729	1	1.13696	1	1346.33	1241.06	1341.83	883.222	1142.29	1380.19
D	At1g10060	^ ^mitochondrion^ ^branched-chain amino acid aminotransferase 1 / branched-chain amino acid transaminase 1 (BCAT1) nearly identical to SP|Q93Y32 Branched-chain amino acid aminotransferase 1, mitochondrial precursor (EC 2.6.1.42) (Atbcat-1) {Arabidopsis thaliana}; contains Pfam profile: PF01063 aminotransferase class IV^	1.06413	1	2.33956	0	1.67877	9.26802e-11	1.33834	1	1.08981	1	899.985	1063.65	2015.99	2923.87	3693.8	3769.46
D	At1g10360	^GLUTATHIONE S-TRANSFERASE 29^endomembrane system^ ^glutathione S-transferase, putative similar to glutathione S-transferase (sp|Q03666|GTX4_TOBAC); similar to EST gb|H36275 gb:AB039930.^	-1.27669	1	1.60026	0.00659352	1.34608	1	1.02882	1	-1.10459	1	2769.92	2290.33	2959.59	3850.04	3687.56	3744.95
B	At1g10450	^ ^mitochondrion^ ^paired amphipathic helix repeat-containing protein similar to Sin3 protein [Yarrowia lipolytica] GI:18076824; contains Pfam profile PF02671: Paired amphipathic helix repeat^	1.00433	1	1.16751	1	-1.26995	0.0145007	-1.00145	1	1.10601	1	4713.66	4751.37	3994.93	3544.89	4293.08	4065.27
B	At1g10540	^ ^NSCC2(Non-selective Cation Channel-2);NCS2(Nucleobase:Cation Symporter-2);Organic Solute Cotransporters;permease activity^Permease 1-like family^xanthine/uracil permease family protein contains Pfam profile: PF00860 permease family^	1.26193	1	1.00056	1	-1.29121	0.00129005	-1.70826	0.000622609	-1.00475	1	2324.42	2739.03	2476.07	2051.92	1457.91	1146.67
E	At1g10610	^ ^BHLH090^ TF ^bHLH^bHLH^basic helix-loop-helix (bHLH) family protein contains Pfam profile: PF00010 helix-loop-helix DNA-binding domain^	1.12926	1	1.03826	1	-1.23127	1	1.10459	1	1.72806	1.57685e-06	264.233	351.608	486.941	329.518	392.53	647.811
B	At1g10960	^ ^ ^ ^ferredoxin, chloroplast, putative strong similarity to FERREDOXIN PRECURSOR GB:P16972 [SP|P16972] from [Arabidopsis thaliana]^	-1.0315	1	1.58048	1	1.09043	1	1.39453	1	-1.94128	0.012161	15216.2	15926.1	17085.6	15781.5	15083.1	13928.3
E	At1g10980	^ ^endomembrane system^ ^expressed protein ; expression supported by MPSS^	-1.73748	0.0415753	-1.37254	0.78708	1.32337	1	1.40445	0.000365824	1.67492	0.000143185	1364.71	932.351	782.503	901.916	1228.53	2315.46
D	At1g11000	^ ^Barley Mlo protein isolog;MLO proteins^ ^seven transmembrane MLO family protein / MLO-like protein 4 (MLO4) identical to membrane protein Mlo4 [Arabidopsis thaliana] gi|14091578|gb|AAK53797; similar to MLO protein SWISS-PROT:P93766, NCBI_gi:1877221 [Hordeum vulgare][Barley]^	1.33875	1.34109e-11	1.25435	1	1.37298	1	1.07454	1	1.05351	1	1510.87	1965.58	2102.72	2379.36	2847.14	2797.81
A	At1g11080	^ ^serine carboxypeptidase activity^ ^serine carboxypeptidase S10 family protein similar to Serine carboxypeptidase II chains A and B (SP:P08819) (EC 3.4.16.6) [Triticum aestivum (Wheat)]^	-1.71549	0.0454836	-1.76613	1	-1.10501	1	-1.0895	1	1.2929	1	190.457	126.459	104.035	89.6443	76.8361	85.433
B	At1g11210	^ ^endomembrane system^ ^expressed protein contains similarity to cotton fiber expressed protein 1 [Gossypium hirsutum] gi|3264828|gb|AAC33276^	1.56763	1	1.01452	1	-1.31205	1	-1.30829	1	-1.49015	0.00264155	1058.23	2325.04	2044.14	1346.75	1137.8	917.98
A	At1g11520	^ ^endomembrane system^ ^pliceosome associated protein-related contains similarity to spliceosome associated protein SAP 145 GI:1173904 from [Homo sapiens]^	-1.62319	0.170334	1.07018	1	-1.2623	1	-1.32092	1	2.00363	1.31344e-09	625.72	470.522	562.222	509.559	363.091	425.421
B	At1g11710	^ ^mitochondrion^ ^pentatricopeptide (PPR) repeat-containing protein contains Pfam profile PF01535: PPR repeat^	1.85298	0.00234489	-1.15168	1	-1.16894	1	-1.05582	1	-1.46044	1	350.658	559.695	501.534	296.241	447.639	452.67
E	At1g11850	^ ^ Trihelix, Triple-Helix transcription factor family;endomembrane system ^ ^expressed protein ^	1.13396	1	1.12118	1	1.23799	1	1.28166	1	1.81411	3.08548e-05	668.247	734.385	753.258	889.413	1173.36	2022.34
E	At1g12080	^ ^ ^ ^expressed protein ^	-1.11896	1	-1.02032	1	1.37485	1	1.78291	0.00884836	1.80396	0.000883615	178.147	123.055	178.5	283.623	585.011	1057.82
A	At1g12200	^ ^ ^ ^flavin-containing monooxygenase family protein / FMO family protein low similarity to FMO2 from Homo sapiens [SP|Q99518]; contains Pfam profile: PF00743 Flavin-binding monooxygenase-like^	-2.35006	9.04522e-06	-1.38325	1	1.13906	1	-1.19283	1	-1.06768	1	858.989	384.81	374.284	318.475	230.307	311.148
D	At1g12240	^ ^ Glycoside Hydrolase Family 32;Glycoside Hydrolase Gene Families;sucrose catabolism, using beta-fructofuranosidase;sucrose degradation 1 ^Glycoside Hydrolase Family 32;BETA-FRUCTOSIDASE^beta-fructosidase (BFRUCT4) / beta-fructofuranosidase / invertase, vacuolar identical to beta-fructosidase GI:1871503 from [Arabidopsis thaliana]; contains Pfam profile PF00251:Glycosyl hydrolases family 32; id…	-1.38641	1	2.03765	1.73178e-17	1.09212	1	1.01562	1	1.02753	1	956.082	861.948	1257.85	1314.36	1681.49	1895.01
C	At1g12280	^ ^Pathogen Defense;endomembrane system^CNL(CC-NBS-LRR)^disease resistance protein (CC-NBS-LRR class), putative domain signature CC-NBS-LRR exists, suggestive of a disease resistance protein.^	1.19028	1	-1.01168	1	1.09144	1	1.425	1.07073e-05	-1.18058	1	623.28	902.973	1010.33	1006.5	1341.41	954.769
E	At1g12320	^ ^ATP binding activity^ ^expressed protein ^	-1.15545	1	-1.25126	1	1.25982	1	1.87903	3.54511e-09	1.17275	1	406.176	453.008	424.814	500.438	903.199	1148.49
E	At1g12330	^ ^chloroplast^ ^expressed protein ^	-1.21685	1	1.25388	1	1.36298	0.0289275	1.25928	1	1.41912	1	10543.1	9728.09	10510.2	11211.7	11591	13997.6
A	At1g12430	^ ^Kinesins;chloroplast^Kinesin-like proteins^armadillo/beta-catenin repeat family protein / kinesin motor family protein ^	-1.45245	5.26145e-10	-1.3801	1	-1.05612	1	1.06485	1	1.20195	1	11787.2	8811.49	7171.55	6340.44	7005.79	7039.76
B	At1g12600	^ ^ ^ ^hypothetical protein ^	-1.19656	1	-1.67551	0.00328662	-1.31801	1	-1.41451	1	1.04464	1	464.943	483.423	377.466	254.484	210.365	197.761
A	At1g12650	^ ^ ^ ^expressed protein similar to KED (GI:8096269) [Nicotiana tabacum]; similar to rRNA processing protein EBP2 (SP:P36049) [Saccharomyces cerevisiae]^	-1.90961	5.87197e-10	-1.03155	1	-1.18192	1	-1.0466	1	1.71431	6.14044e-05	6665.4	5228.94	5513.21	6562.32	5294.34	5841.81
B	At1g12730	^ ^ ^ ^cell division cycle protein-related contains 10 transmembrane domains; similar to PIG-U (GI:27372215) [Rattus norvegicus]; similar to Cell division cycle protein 91-like 1 (CDC91-like 1 protein) (PIG-U) (Swiss-Prot:Q9H490) [Homo sapiens]^	-1.05634	1	-1.07635	1	-1.30912	1	-1.15308	1	1.2725	1.59412e-05	768.039	829.796	773.327	627.308	605.776	611.086
E	At1g12845	^ ^endomembrane system^ ^expressed protein ^	-1.32234	1	1.01851	1	1.49612	1	2.45835	3.52044e-10	-1.15244	1	3504.93	2854.33	2747.15	4835.06	10208.9	11576.8
E	At1g12860	^ ^BHLH033^ TF ^bHLH^bHLH^basic helix-loop-helix (bHLH) family protein / F-box family protein contains Pfam profiles: PF00646 F-box domain, PF00010 helix-loop-helix DNA-binding domain^	1.05814	1	-1.04516	1	1.3369	1	2.25073	0.0251325	1.96735	1.82804e-05	174.164	189.935	203.92	248.911	315.667	5247.98
A	At1g12880	^ ^mitochondrion^ ^MutT/nudix family protein similar to diphosphoinositol polyphosphate phosphohydrolase [Homo sapiens] GI:3978224; contains Pfam profile PF00293: NUDIX domain^	-1.4038	1	-1.77839	0.0435567	1.03963	1	-1.36534	0.11864	-1.27899	1	3415.54	2954.32	1738.9	1593.43	1414.46	1145.85
A	At1g12980	^ENHANCER OF SHOOT REGENERATION1/DORNROSCHEN^ ^ TF ^AP2/ERF^ERF-EREBP^AP2 domain-containing transcription factor, putative / enhancer of shoot regeneration (ESR1) similar to gb|D38124 EREBP-3 from Nicotiana tabacum and contains PF|00847 AP2 domain; identical to cDNA enhancer of shoot regeneration ESR1 GI:18028939, enhancer of shoot regeneration ESR1 [Arabidopsis thaliana] GI:18028940^	-1.15774	1	-1.5726	7.64826e-08	-1.24505	1	-1.74463	0.212189	-1.97909	0.78471	2870.49	2335.37	1607.23	1678.12	985.68	499.614
C	At1g13020	^ ^Protein synthesis factors;translation initiation factor activity^eIF4B - eukaryotic initiation factor 4B^eukaryotic translation initiation factor, putative (EIF4B5) eukaryotic initiation factor 4B (GI:6739522) {Arabidopsis thaliana}; EST gb|T22808 comes from this gene^	-1.20232	1	1.26928	0.0282748	-1.09691	1	-1.0353	1	-1.00021	1	4186.53	4010.59	4923.58	4666.1	4668.87	4881.03
E	At1g13080	^CYTOCHROME P450 71B2^Cytochrome P450;cytochrome P450 activity^CYP71B^cytochrome P450 family protein identical to gb|D78605 cytochrome P450 monooxygenase from Arabidopsis thaliana and is a member of the PF|00067 Cytochrome P450 family. ESTs gb|Z18072, gb|Z35218 and gb|T43466 come from this gene^	1.38876	1	1.11162	1	1.50242	0.0691911	1.49834	4.56591e-05	1.67579	0.0092307	339.855	428.112	413.595	502.793	720.424	1144.91
D	At1g13230	^ ^chloroplast^ ^leucine-rich repeat family protein contains leucine rich-repeat (LRR) domains Pfam:PF00560, INTERPRO:IPR001611; contains similarity to gb|U42445 Cf-2.2 from Lycopersicon pimpinellifolium^	1.93825	1	3.08569	8.97557e-14	1.74364	1	1.82306	1	1.04483	1	107.891	230.463	517.014	792.481	1161.55	1045.49
D	At1g13400	^JAGGED-like^ ^ TF ^C2H2 (Zn)^ ^zinc finger (C2H2 type) family protein contains Pfam domain, PF00096: Zinc finger, C2H2 type^	3.58589	2.84887e-12	1.75156	7.91356e-20	1.73586	5.46038e-05	1.01545	1	-1.0835	1	341.307	1348.88	2070.09	3786.11	3898.19	3804.48
C	At1g13600	^ ^AtbZIP58^ TF ^bZIP^ ^bZIP transcription factor family protein contains Pfam profile: PF00170 bZIP transcription factor^	3.91929	0	-1.16498	1	-1.3755	1	-1.22443	1	-1.22514	1	913.03	2740.75	2291.21	2093.99	1719.16	1222.43
D	At1g13680	^ ^phospholipase C activity^ ^expressed protein ^	-1.32979	1	2.10433	1	3.2784	3.63623e-22	1.29695	1	-1.0368	1	46.0278	50.0183	114.765	394.605	537.719	453.231
C	At1g14030	^ ^chloroplast^ ^ribulose-1,5 bisphosphate carboxylase oxygenase large subunit N-methyltransferase, putative strong similarity to SP|P94026 Ribulose-1,5 bisphosphate carboxylase/oxygenase large subunit N- methyltransferase, chloroplast precursor (EC 2.1.1.127) ([Ribulose- bisphosphate-carboxylase]-lysine N-methyltransferase) {Nicotiana tabacum}; contains Pfam profile PF00856: SET domain; Rare GC …	1.55613	0.00666547	-1.14219	1	-1.02435	1	1.08026	1	1.05287	1	460.81	678.779	558.269	624.04	751.693	690.21
C	At1g14180	^ ^lyase activity^ ^expressed protein ^	1.01436	1	1.28783	0.00833868	-1.10549	1	-1.07731	1	-1.21217	1	1435.54	1630.12	2077.86	1889.08	1824.76	1815.26
C	At1g14450	^ ^ ^ ^expressed protein contains similarity to cytochrome c oxidase subunit I GI:5678701 from [Loligo pealei]^	1.1279	1	-1.17885	1	-1.00967	1	1.25973	1	-1.84705	0.000141071	10279.2	10332	10962.7	13401.2	12282.1	8490.34
E	At1g14580	^ ^ ^ TF ^C2H2 (Zn)^ ^zinc finger (C2H2 type) family protein similar to zinc finger protein ID1 GB:AAC18941 GI:3170601 from [Zea mays] contains Pfam domain, PF00096: Zinc finger, C2H2 type^	-1.80693	1.10711e-06	1.08339	1	1.30168	1	1.44865	1	1.58328	1	420.224	235.109	241.734	318.136	526.928	933.297
A	At1g14700	^ ^acid phosphatase activity^ ^purple acid phosphatase, putative contains Pfam profile: PF00149 calcineurin-like phosphoesterase; similar to purple acid phosphatase (GI:20257479) [Arabidopsis thaliana]^	-1.77729	1.51484e-05	1.02508	1	1.11933	1	-1.13074	1	1.29466	1	1232.56	784.224	787.194	820.436	784.486	1059.12
A	At1g14720	^ENDOXYLOGLUCAN TRANSFERASE A2^ Assembly, Architecture, and Growth;Glycoside Hydrolase Family 16;Glycoside Hydrolase Gene Families;endomembrane system ^Growth modifying proteins;Glycoside Hydrolase Family 16^xyloglucan:xyloglucosyl transferase / xyloglucan endotransglycosylase / endo-xyloglucan transferase (XTR2) identical to endoxyloglucan transferase [Arabidopsis thaliana] GI:5533311^	-2.59231	7.55752e-24	1.04278	1	1.02042	1	-1.08437	1	-1.28008	1	6295.47	3158.33	2840.78	3223.25	3320.01	2905.3
A	At1g14760	^ ^ ^ ^expressed protein ^	-2.57998	1.62459e-10	-1.5279	0.00153886	1.2215	1	1.4821	0.0147284	1.40858	0.0852703	1324.23	493.438	311.457	440.407	641.486	1012.55
B	At1g14920	^GA INSENSITIVE/RGA2^ ^ TF ^GRAS^ ^gibberellin response modulator (GAI) (RGA2) / gibberellin-responsive modulator identical to GAI GB:CAA75492 GI:2569938 [Arabidopsis thaliana] (Genes Dev. In press)^	1.28054	1	1.08342	1	-1.57325	4.50943e-08	1.11278	1	1.20142	1	7383.36	10014.2	8238.5	5278.95	6937.53	7460.98
A	At1g15160	^ ^MATE(Multi Antimicrobial Extrusion)^ ^MATE efflux family protein Strong similarity to gi|4734005 F3L12.7 hypothetical protein from Arabidopsis thaliana BAC gb|AC007178; similar to ripening regulated protein DDTFR18 [Lycopersicon esculentum] GI:12231296; contains Pfam profile PF01554: Uncharacterized membrane protein family^	-2.34276	0.0121624	-1.27087	1	1.32627	1	-1.25869	1	1.14223	1	498.457	274.962	236.87	238.429	147.603	122.079
E	At1g15210	^ ^ABC(ATP-Binding Cassette);ABC Superfamily;ABC transporters;ATP-binding cassette (ABC) transporter activity^PDR subfamily;Putative ABC transporter^ABC transporter family protein Similar to gb|Z70524 GI:1514643 PDR5-like ABC transporter from Spirodela polyrrhiza and is a member of the PF|00005 ABC transporter family. ESTs gb|N97039 and gb|T43169 come from this gene^	1.06222	1	1.26234	1	2.24028	2.85069e-05	1.36802	1	1.36715	1	66.9394	63.6148	83.1397	223.743	336.877	454.458
E	At1g15260	^ ^mitochondrion^ ^expressed protein EST gb|N65467 comes from this gene^	-1.18299	1	1.02319	1	4.34509	7.96984e-06	3.09406	5.95165e-12	1.92499	0.010445	144.494	137.646	152.816	750.649	2142.16	4576.58
B	At1g15310	^SIGNAL RECOGNITION PARTICLE 54 KDA SUBUNIT^nucleotide binding activity^ ^signal recognition particle 54 kDa protein 1 / SRP54 (SRP-54) (SRP-54A) identical to Swiss-Prot:P37106 signal recognition particle 54 kDa protein 1 (SRP54) [Arabidopsis thaliana]^	-1.12397	1	-1.56806	0.0141032	-1.27685	1	-1.58217	0.78531	-1.28259	1	1298.48	1073.84	971.307	669.332	396.833	366.171
C	At1g15350	^ ^ ^ ^expressed protein ^	1.37429	1	1.43985	7.05775e-07	1.11613	1	-1.11798	1	-1.247	1	318.408	469.863	728.306	725.864	617.018	534.932
E	At1g15360	^WAX INDUCER1/SHINE1^ ^ TF ^AP2/ERF^ERF-EREBP^AP2 domain-containing transcription factor family protein Similar to SP|P16146 PPLZ02 protein {Lupinus polyphyllus}; contains an PF|00847 AP2 domain. EST gb|AA728476 comes from this gene^	1.9314	0.0397495	1.16513	1	1.29119	1	2.37872	1	2.44157	6.65475e-06	83.2921	158.136	238.269	358.284	1293.99	3856.27
D	At1g15560	AT1G15560_1 hypothetical protein contains similarity to EnSpm-like transposon protein GI 4038059 from Arabidopsis thaliana	-1.56122	1	1.51252	0.000403666	1.61054	0.0903821	1.02288	1	1.197	1	555.364	373.84	690.573	896.957	741.961	750.561
A	At1g15670	^ ^F-box (FBX)^D^kelch repeat-containing F-box family protein similar to SP|Q9ER30 Kelch-related protein 1 (Sarcosin) {Rattus norvegicus}; contains Pfam profiles PF01344: Kelch motif, PF00646: F-box domain^	-3.09824	2.2881e-23	1.1783	1	1.21789	1	-1.63542	0.143291	-1.24981	1	9499.44	3150.67	3238.11	4151.92	3018.08	2915.04
A	At1g15960	^ATNRAMP6^Nramp(Metal Ion (Mn2+-iron) Transporter);Inorganic Solute Cotransporters;inorganic anion transporter activity^Nramp2 family^NRAMP metal ion transporter 6, putative (NRAMP6) identical to putative metal transporter [Arabidopsis thaliana] gi|12666983|emb|CAC28123; similar to NRAMP1 protein [Arabidopsis thaliana] gi|7108911|gb|AAF36535; member of the natural resistance-associated macrophage…	-2.00212	3.60427e-07	-1.15209	1	1.16483	1	-1.33245	1	-1.66777	4.8764e-07	866.728	569.331	583.346	623.651	457.723	366.435
B	At1g16490	^ ^AtMYB58^ TF ^MYB-(R1)R2R3^ ^myb family transcription factor (MYB58) contains PFAM profile: myb DNA binding domain PF00249^	-1.28219	1	1.43681	0.00357777	-1.15248	1	-1.1441	1	1.35419	1	1297.26	1282.08	1367.75	1140.02	1185.19	1466.16
D	At1g16705	^ ^ ^ ^p300/CBP acetyltransferase-related protein-related similar to p300/CBP acetyltransferase-related protein 2 [Arabidopsis thaliana] GI:12597461^	1.29841	1	3.46887	0.0016501	3.10656	0	1.69994	4.92821e-08	-1.02845	1	190.966	385.432	1170.12	3125.35	4451.9	4373.53
D	At1g16750	^ ^chloroplast^ ^expressed protein contains Pfam profile PF04784: Protein of unknown function, DUF547^	-1.03653	1	1.10764	1	1.63824	4.90691e-07	1.48194	0.247247	1.2397	1	712.906	618.086	798.526	1495.38	2018.43	2221.02
B	At1g16800	^ ^ATP binding activity^ ^tRNA-splicing endonuclease positive effector-related contains similarity to SEN1, a positive effector of tRNA-splicing endonuclease [Saccharomyces cerevisiae] gi|172574|gb|AAB63976^	-1.1793	1	1.11665	1	-1.49932	0.0190665	-1.13189	1	1.62374	1	1451.23	1370.25	1436.92	1155.93	1092.53	1217.08
A	At1g16850	^ ^endomembrane system^ ^expressed protein ^	-2.1414	0.000130322	-1.50199	1	1.47845	1	-1.06127	1	1.20494	1	170.222	119.857	87.8811	132.948	98.1959	112.777
E	At1g16960	^ ^ ^ ^expressed protein ^	1.07892	1	1.17239	1	-1.18373	1	1.23032	1	1.66382	0.00174973	236.512	224.658	172.939	159.475	190.006	396.926
D	At1g17190	^ ^ ^ ^glutathione S-transferase, putative One of three repeated glutathione transferases. 65% identical to glutathione transferase [Arabidopsis thaliana] (gi|4006934). Location of est 141C5T7 (gb|T46669); supported by fl cDNA gi:14326476gb:AF385691.^	-1.01656	1	1.46226	1	1.93616	9.65852e-08	1.72696	1.02599e-08	1.04293	1	1047.08	1005.76	1204.63	2141.91	3773.94	3788.43
A	At1g17230	^ ^LRR XI & LRR XII ;protein kinase activity^ ^leucine-rich repeat family protein / protein kinase family protein contains protein kinase domain, Pfam:PF00069; contains leucine-rich repeats, Pfam:PF00560^	-2.11413	5.67014e-07	-1.1167	1	1.1133	1	1.00542	1	-1.08464	1	447.079	288.152	269.986	255.876	243.283	246.38
A	At1g17380	^ ^ ^ ^expressed protein ^	-2.30274	8.4768e-07	-1.50749	0.240682	-1.05043	1	1.09814	1	1.05708	1	1034.8	495.273	538.195	536.227	615.635	839.819
B	At1g17455	^ ^ ^ ^expressed protein ^	-1.14494	1	1.39971	1	-1.53785	2.17752e-12	-1.06244	1	1.74708	1	2118.55	1981.51	2500.15	1951.2	1705.37	1829.36
D	At1g17830	^ ^mitochondrion^ ^expressed protein ^	-1.18056	1	2.06935	0.085683	1.9937	5.75813e-06	1.154	1	-1.77747	5.68071e-08	627.98	755.616	1033.39	1478.91	1711.02	1217.26
B	At1g17970	^ ^mitochondrion^ ^zinc finger (C3HC4-type RING finger) family protein similar to Pfam domain, PF00097: Zinc finger, C3HC4 type (RING finger)^	-1.02859	1	-1.2774	1	-1.43647	0.0025364	-1.05476	1	-1.1226	1	1579.47	1522.66	1363.55	995.61	1089.39	1034.14
D	At1g18040	^Cyclin-dependent kinase D1;3^CDC2 Kinase ;Core Cell Cycle Genes;protein kinase activity^ ^cell division protein kinase, putative similar to cell division protein kinase 7 [Homo sapiens] SWISS-PROT:P50613^	1.20281	1	1.14139	1	1.29683	1	1.10162	1	-1.38907	0.00167575	3794.73	3723.47	4002.65	5295.78	5171.51	4455.44
C	At1g18320	^ ^ ^ ^mitochondrial import inner membrane translocase subunit Tim17/Tim22/Tim23 family protein contains Pfam domain PF02466: Mitochondrial import inner membrane translocase subunit Tim17^	1.21109	1	1.18573	1	1.00848	1	-1.10456	1	-1.33351	0.014694	845.07	1060.91	1223.37	1074.75	1068.99	852.41
A	At1g19540	^ ^ ^ ^isoflavone reductase, putative similar to SP|P52577; contains isoflavone reductase domain PF02716^	-3.82552	1.23363e-23	-1.76662	1.70647e-06	1.55877	1	-1.86385	1	-1.00093	1	2065.19	688.226	405.793	323.864	161.94	178.056
D	At1g19640	^JASMONIC ACID CARBOXYL METHYLTRANSFERASE^jasmonic acid biosynthesis^S-adenosyl L-methionine:jasmonic acid carboxyl methyltransferase^S-adenosyl-L-methionine:jasmonic acid carboxyl methyltransferase (JMT) nearly identical to gi:13676829^	1.11723	1	2.03681	1.98129e-12	1.29998	1	1.21896	1	1.27441	1	145.019	141.148	210.628	238.122	245.89	286.929
C	At1g19690	^ ^chloroplast^ ^expressed protein similar to (SP:P76370) Protein yeeZ precursor. {Escherichia coli O157:H7}^	1.60467	0.0402695	-1.08761	1	-1.12849	1	-1.00798	1	-1.31134	1	2009.79	3004.17	2784.42	2808.63	2879.68	2371.6
A	At1g19770	^ ^DMT(The Drug/Metabolite Transporter);Organic Solute Cotransporters;purine transporter activity^Purine permease family^purine permease-related low similarity to purine permease [Arabidopsis thaliana] GI:7620007; contains Pfam profile PF03151: Domain of unknown function, DUF250^	-1.41745	0.25998	-1.11605	1	1.03582	1	-1.35934	1	2.01409	1.38637e-07	2948.95	2364.62	1979.36	2298.35	1300.64	2215.28
D	At1g19830	^ ^SAUR^ ^auxin-responsive protein, putative similar to auxin-induced protein TGSAUR21 (GI:10185818) [Tulipa gesneriana]^	-1.19574	1	1.21239	1	2.22524	0.000225247	1.85463	0.78531	1.14094	1	752.638	661.057	924.613	2028.79	3141.73	3106.7
D	At1g20020	^ ^ferredoxin-NADP reductase activity^ ^ferredoxin--NADP(+) reductase, putative / adrenodoxin reductase, putative strong similarity to Ferredoxin--NADP reductase, chloroplast precursor (EC 1.18.1.2) (FNR) from {Pisum sativum} SP|P10933, {Mesembryanthemum crystallinum} SP|P41343, {Spinacia oleracea} SP|P00455, [Capsicum annuum] GI:6899972^	1.34149	0.000713407	1.18339	1	1.00487	1	1.07609	1	1.25057	1	4070.48	5210.12	6093.03	6599.84	6594.03	7738.13
B	At1g20140	^ARABIDOPSIS SKP1-LIKE 4^ATP binding activity^ ^E3 ubiquitin ligase SCF complex subunit, putative similar to Skp1 GI:4959710 from [Medicago sativa]^	1.02579	1	-1.21028	1	-1.22632	1	-1.47699	1	-1.29433	0.00402496	10004.6	11668.5	9548.39	8927.67	7329.97	5993.49
B	At1g20160	^ ^subtilases (subtilisin ? like serine proteases) ;endomembrane system^ ^subtilase family protein similar to subtilisin-type protease precursor GI:14150446 from [Glycine max]^	1.43895	0.000153192	-1.00127	1	-1.07832	1	-1.27876	1	-1.3059	1	768.529	1010.52	944.01	770.675	568.4	563.248
B	At1g20530	^ ^ ^ ^hypothetical protein ^	-1.02142	1	-1.41458	0.00394865	-1.52207	1	-1.05391	1	-1.04792	1	930.645	814.927	831.974	659.612	637.775	597.652
A	At1g20620	^SENESCENCE 2^catalase reaction^ ^catalase 3 (SEN2) almost identical to catalase 3 SP:Q42547, GI:3123188 from [Arabidopsis thaliana]; identical to catalase 3 (SEN2) mRNA, partial cds GI:3158369^	-2.60867	0.000421536	-1.22165	1	1.27603	1	1.0584	1	1.02476	1	20999.6	16350.1	17918.4	21159.4	17477.8	16433.7
E	At1g20650	^ ^RLCK VII ;protein kinase activity^ ^protein kinase family protein contains Pfam domain PF00069: Protein kinase domain^	-1.03183	1	-1.12189	1	1.14579	1	1.7397	6.31984e-10	1.28159	1	4656.18	4853.95	4523.1	6323.24	9613.32	10796.6
D	At1g20850	^XYLEM CYSTEINE PEPTIDASE 2^endomembrane system^ ^cysteine endopeptidase, papain-type (XCP2) identical to papain-type cysteine endopeptidase XCP2 GI:6708183 from [Arabidopsis thaliana]^	-1.56839	0.101732	-1.51447	0.0277494	1.60454	1	1.22967	1	-1.11741	1	1647.14	1110.28	1052.78	2456.69	2950.25	1986.44
A	At1g20980	^ ^SPL14^ TF ^SBP (Zn)^ ^SPL1-Related2 protein (SPL1R2) strong similarity to SPL1-Related2 protein [Arabidopsis thaliana] GI:6006427; contains Pfam profile PF03110: SBP domain^	-1.39748	0.00193283	1.04426	1	1.26892	1	-1.05943	1	-1.02742	1	7527.75	5642.26	6509.97	6000.87	5973.72	7470.23
A	At1g21120	^ ^ ^ ^O-methyltransferase, putative similar to GI:2781394^	-2.19435	0.000482059	-1.06877	1	1.3622	1	-1.0351	1	1.28805	1	340.831	184.805	169.381	208.076	203.663	270.392
A	At1g21130	^ ^ ^ ^O-methyltransferase, putative similar to GI:2781394^	-2.73067	2.23176e-08	-1.18405	1	1.31898	1	-1.19482	1	1.43361	1	441.434	219.775	157.724	178.486	204.409	305.759
A	At1g21250	^CELL WALL-ASSOCIATED KINASE^Wall Associated Kinase-Like ;Receptor kinase-like protein family;kinase activity^ ^wall-associated kinase 1 (WAK1) identical to wall-associated kinase 1 [Arabidopsis thaliana] GI:3549626; expressed in leaves and stems & induced by pathogen infection (PMID:10380805)^	-1.5883	0.0334822	-1.53673	0.00208681	1.00922	1	-1.36079	1	1.10456	1	5336.61	3214.26	2084.22	1532.53	1070.69	1287.47
A	At1g21270	^ ^Wall Associated Kinase-Like ;response to salicylic acid stimulus^ ^wall-associated kinase 2 (WAK2) identical to wall-associated kinase 2 [Arabidopsis thaliana] GI:4826399; induced by salicylic acid or INA (PMID:10380805)^	-1.31883	0.000752866	-1.63952	1	-1.19757	1	-1.04832	1	1.17902	1	1389.65	818.227	524.496	439.209	458.207	470.266
E	At1g21310	^extensin 3^EMB;endomembrane system^Embryo Defective^proline-rich extensin-like family protein contains extensin-like region, Pfam:PF04554^	-1.21222	1	1.30463	1	-1.06189	1	1.56162	0.00470507	1.4017	1	2754.67	1917.22	2633.12	2753.54	2694.81	3291.14
A	At1g21400	^ ^Acyl Lipid Metabolism;alpha-ketoacid dehydrogenase activity;isoleucine degradation I;leucine degradation I;valine degradation I^ alpha-Ketoacid Decarboxylase E1 alpha subunit, branched chain alpha-ketoacid dehydrogenase complex;BRANCHED-CHAIN ALPHA KETO-ACID DEHYDROGENASE ^2-oxoisovalerate dehydrogenase, putative / 3-methyl-2-oxobutanoate dehydrogenase, putative / branched-chain alpha-keto aci…	-1.60321	0.000366237	-1.32366	1	-1.06018	1	-1.02209	1	1.44851	1	7841.88	5271.45	5039.75	5323.66	4897.63	5904.09
C	At1g21460	^ ^MTN3-like protein family;molecular_function unknown^ ^nodulin MtN3 family protein contains similarity to MTN3 (nodule development protein) GB:Y08726 GI:1619601 from [Medicago truncatula]^	11.1195	0	1.99678	1	1.50399	1	-1.19599	1	-1.37151	1	1201.07	11836.6	13581.9	13592.2	12989.6	9750.89
E	At1g21950	^ ^ ^ ^hypothetical protein ^	1.03061	1	1.10822	1	1.74782	0.00119966	1.60918	2.08442e-07	1.18121	1	128.11	118.018	140.268	256.135	398.729	551.528
A	At1g22180	^ ^ ^ ^SEC14 cytosolic factor family protein / phosphoglyceride transfer family protein contains Pfam profile: PF00650 CRAL/TRIO domain; similar to polyphosphoinositide binding protein Ssh1p (GI:|2739044) {Glycine max}; similar to Phosphatidylinositol Transfer Protein Sec14p (GI:2780955) [Saccharomyces cerevisiae]^	-1.99346	4.67457e-05	-1.21752	1	-1.43136	1	-1.30207	1	1.5344	1	645.671	387.902	266.342	193.41	177.035	210.369
E	At1g22370	^ ^Glycosyl transferases;Glycosyltransferase Family 1;Glycosyltransferase Gene Families;glycosyltransferase^GT family 1;Glycosyltransferase- Family 1^UDP-glucoronosyl/UDP-glucosyl transferase family protein glycosyltransferase family^	1.14208	1	1.12292	1	1.3265	1	1.80082	0.0416393	1.5099	1	112.84	110.851	93.8274	123.486	223.149	370.401
B	At1g22710	^SUCROSE-H+ SYMPORTER^SUGAR TRANSPORTERS;GPH-S(Glycoside-Pentoside-Hexuronide (GPH) Symporter);Organic Solute Cotransporters;plasma membrane^DISACCHARIDE-H+ (SUCROSE) SYMPORTERS;Sucrose-proton symporter family^sucrose transporter / sucrose-proton symporter (SUC2) nearly identical to sucrose-proton symporter SUC2 [Arabidopsis thaliana] GI:407092^	1.40492	1	-1.31733	1	-1.32139	1	-1.3653	1	-2.25812	0.0215465	1407.59	2525.86	1705.38	1098.96	947.999	515.517
D	At1g22910	^ ^ ^ ^RNA recognition motif (RRM)-containing protein contains InterPro entry IPR000504: RNA-binding region RNP-1 (RNA recognition motif) (RRM); similar to GB:AAC33496^	1.56964	1	2.31979	2.04208e-08	1.57861	2.72116e-07	1.82234	3.12191e-11	1.03827	1	149.422	236.38	419.3	597.677	925.027	1122.36
E	At1g23020	^ ^CytB-H+(Cytochrome b558 (CytB) H+-channel);FRO1-like protein; NADPH oxidase-like family;superoxide-generating NADPH oxidase activity^ ^ferric-chelate reductase, putative similar to ferric-chelate reductase (FRO1) [Pisum sativum] GI:15341529; contains Pfam profile PF01794: Ferric reductase like transmembrane component^	-1.33887	1	1.2075	1	1.38493	1	1.66808	5.77394e-07	1.41063	0.174729	3022.27	2404.23	2413.53	2949.63	4419.45	5506.37
B	At1g23080	^PIN-FORMED 7^AEC(Auxin Efflux Carrier);Organic Solute Cotransporters;transporter activity^Similarity to auxin transport protein family^auxin efflux carrier protein, putative similar to efflux carrier of polar auxin transport [Brassica juncea] gi|12331173|emb|CAC24691^	1.56859	0.0196889	-1.01937	1	-1.02551	1	1.02603	1	1.05038	1	2126.69	3456.37	2873.98	2494.59	2858.83	2790.3
A	At1g23090	^SULFATE TRANSPORTER 91^SulP(Sulfate Permease);Inorganic Solute Cotransporters;sulfate transporter activity^Putative sulfate transporter family^sulfate transporter, putative similar to sulfate transporter [Arabidopsis thaliana] GI:2285885; contains Pfam profiles PF00916: Sulfate transporter family, PF01740: STAS domain^	-1.53252	0.25998	-1.04962	1	-1.38146	1	-1.86197	0.00140842	-1.66383	1	479.689	314.665	333.066	174.9	88.2361	64.486
D	At1g23140	^ ^mitochondrion^ ^C2 domain-containing protein similar to zinc finger and C2 domain protein GI:9957238 from [Arabidopsis thaliana]^	1.35775	1	1.67094	6.51259e-05	1.19708	1	-1.18532	1	-1.0616	1	415.2	583.355	1193.86	1304.97	1324.09	1009.43
B	At1g23380	^ ^ ^ TF ^HB^HD-KNOX^homeobox transcription factor (KNAT6) nearly identical to homeodomain transcription factor KNAT6 (KNAT6L) GI:15991302 [Arabidopsis thaliana], homeodomain transcription factor KNAT6 (KNAT6S) [Arabidopsis thaliana] GI:15991300^	-1.20138	1	1.04135	1	1.01304	1	-1.61447	0.00333232	-1.35603	1	7909.35	7402.51	7617.5	8515.31	5768.16	3930.14
A	At1g23600	^ ^ ^ ^expressed protein contains Pfam profile PF02713: Domain of unknown function DUF220; expression supported by MPSS^	-1.64681	0.00462106	-1.35749	1	1.38488	1	-1.01256	1	-1.05062	1	488.566	306.084	253.622	299.596	239.958	249.254
B	At1g23800	^ALDH2B^ALDH(Aldehyde Dehydrogenase);aldehyde dehydrogenase activity^ ^aldehyde dehydrogenase, mitochondrial (ALDH3) nearly identical to mitochondrial aldehyde dehydrogenase ALDH3 [Arabidopsis thaliana] gi|19850249|gb|AAL99612; contains Pfam profile PF00171: aldehyde dehydrogenase (NAD) family protein^	-1.44219	1	-1.19212	1	-1.25521	1	-1.994	3.59667e-08	-1.16659	1	1269.89	1111.52	948.571	601.775	343.282	252.414
E	At1g24020	^ ^ ^ ^Bet v I allergen family protein similar to major pollen allergen Bet v 1 GB:CAA96544 GI:1321726 from [Betula pendula]; contains Pfam profile PF00407: Pathogenesis-related protein Bet v I family^	-1.56006	1	-1.66383	1	1.14343	1	2.22203	7.48275e-08	1.57111	1	14261.4	8816.61	9497.35	9922.19	11303.1	21965.8
E	At1g24050	^ ^ATP binding activity^ ^expressed protein ^	-1.78323	0.0183833	-1.05024	1	-1.12324	1	-1.27246	1	1.19947	1	25721.2	18194.2	18009.6	17225.8	18316.1	21755.9
B	At1g24180	^ ^Acyl Lipid Metabolism;pyruvate dehydrogenase activity^Plastidial Pyruvate Dehydrogenase E1alpha subunit^pyruvate dehydrogenase E1 component alpha subunit, mitochondrial, putative similar to SP|P52901 Pyruvate dehydrogenase E1 component alpha subunit, mitochondrial precursor (EC 1.2.4.1) (PDHE1-A) {Arabidopsis thaliana}; contains Pfam profile PF00676: Dehydrogenase E1 component^	-1.10426	1	-1.17562	1	-1.43546	1	-1.22349	1	1.37364	0.00635208	5819.37	5659.84	5470.61	4912.43	4360.14	4818.45
D	At1g24260	^SEPALLATA3^AGL9^ TF ^MADS^Type II (MIKCc)^MADS-box protein (AGL9) strongly similar to GB:O22456, MADS-box protein, Location of EST gb|H37053^	4.35686	0.000132154	3.70309	2.04797e-12	1.57213	1	1.11466	1	1.10835	1	879.578	3654.29	9042.75	12435.2	12502.1	11855.4
A	At1g24530	^ ^ ^ ^transducin family protein / WD-40 repeat family protein similar to Vegetatible incompatibility protein HET-E-1 (SP:Q00808) {Podospora anserina}; contains 7 WD-40 repeats (PF00400)^	-1.89125	0.0143057	-1.16017	1	1.24537	1	1.01754	1	2.01986	2.6868e-05	312.412	152.637	138.183	159.484	206.869	317.659
B	At1g24575	^ ^mitochondrion^ ^expressed protein ^	1.39641	1	-2.07443	2.72258e-11	-2.16862	1	-1.49058	1	-1.77531	1	1132.8	1665.36	976.239	649.953	415.122	223.865
C	At1g24590	^ ^ ^ TF ^AP2/ERF^ERF-EREBP^AP2 domain-containing transcription factor, putative contains AP2 DNA-binding domain^	2.1496	2.11197e-23	1.22448	1	-1.02415	1	-1.77224	0.00409789	-2.97531	4.13866e-10	3339.58	6693.26	8508.6	7072.03	4432.9	1940.35
A	At1g24735	^ ^ ^ ^caffeoyl-CoA 3-O-methyltransferase, putative similar to SP|Q43237 [Vitis vinifera], GI:684942 [Medicago sativa subsp. sativa]^	-1.78586	2.45436e-07	-1.46765	1.08514e-08	1.00942	1	-1.29729	1	-1.10092	1	566.74	403.66	332.524	299.16	242.496	211.325
C	At1g25230	^ ^endomembrane system^ ^purple acid phosphatase family protein contains Pfam profile: PF00149 calcineurin-like phosphoesterase; similar to purple acid phosphatase (GI:20257479) [Arabidopsis thaliana]^	-1.35204	1	2.59435	2.53304e-36	1.24291	1	-1.31181	1	1.06981	1	162.659	146.411	247.509	308.773	226.586	206.353
D	At1g25250	^ ^ ^ TF ^C2H2 (Zn)^ ^zinc finger (C2H2 type) family protein contains zinc finger, C2H2 type, domain, PROSITE:PS00028^	-1.12478	1	2.0599	2.44709e-14	1.61172	1	1.20533	1	-1.4234	1	313.604	248.645	576.142	841.759	863.928	813.678
A	At1g25310	^ ^BHLH108^ TF ^bHLH^bHLH^basic helix-loop-helix (bHLH) family protein contains Pfam profile: PF00010 helix-loop-helix DNA-binding domain^	-2.37921	4.3283e-09	-1.28542	1	1.08892	1	-1.03404	1	1.21507	1	203.802	83.329	72.4676	86.7609	79.4549	83.3516
E	At1g25340	^ ^AtMYB116^ TF ^MYB-(R1)R2R3^ ^myb family transcription factor (MYB116) contains Pfam profile: PF00249 myb-like DNA-binding domain^	1.05923	1	-1.24093	1	1.20324	1	2.01871	1	1.77979	0.00994332	44.5114	58.5396	57.6677	67.1614	130.606	187.5
E	At1g25450	^ ^Acyl Lipid Metabolism;Strong similarity to beta-keto-Coa synthase family^Ketoacyl-CoA Synthase^very-long-chain fatty acid condensing enzyme, putative nearly identical to fatty acid condensing enzyme CUT1 GI:5001734 from [Arabidopsis thaliana]^	-1.75889	1	1.161	1	1.14542	1	1.54262	1	2.08866	0.00163345	149.501	80.4335	112.387	145.056	173.144	360.522
A	At1g25530	^ ^AAAP(Amino Acid/Auxin Permease);Organic Solute Cotransporters;AAAP family;amino acid permease activity^Amino acid permease family^lysine and histidine specific transporter, putative similar to lysine and histidine specific transporter GI:2576361 from [Arabidopsis thaliana]; contains Pfam profile PF01490: Transmembrane amino acid transporter protein^	-2.08662	0.00739883	-1.23265	1	-1.10636	1	-1.44338	1	-1.40897	1	6327.15	4019.5	2488.49	2605.87	2134.95	1331.25
B	At1g25580	^ ^ANAC008^ TF ^NAC^ ^no apical meristem (NAM) family protein contains Pfam PF02365: No apical meristem (NAM) domain; similar to putative NAM protein (GP:21554371) (Arabidopsis thaliana)^	1.06813	1	-1.18171	1	-1.31412	0.0419063	-1.12223	1	-1.21655	1	2345.07	2394.02	2222.48	1734.94	1668.68	1541.95
C	At1g26180	^ ^mitochondrion^ ^expressed protein ^	1.18507	1	-1.05124	1	-1.01582	1	-1.12018	1	1.36839	0.0105504	1633.03	2141.59	2144.1	2358.83	1988.74	2588.65
A	At1g26190	^ ^pyrimidine ribonucleotide metabolism;pyrimidine ribonucleotide/ribonucleoside metabolism^URIDINE KINASE^phosphoribulokinase/uridine kinase family protein weak similarity to SP|Q59190 Uridine kinase (EC 2.7.1.48) (Uridine monophosphokinase) (Cytidine monophosphokinase) {Borrelia burgdorferi}; contains Pfam profile PF00485: Phosphoribulokinase / Uridine kinase family^	-2.11454	3.62753e-18	1.26349	1	1.10316	1	-1.429	1	1.01353	1	5273.62	2977.73	3505.67	3311.46	2649.63	3264.58
A	At1g26210	^ ^ ^ ^expressed protein similar to hypothetical protein GI:6524175 from [Arabidopsis thaliana]^	-2.54131	9.71698e-23	-1.33785	1	1.38964	1	1.27515	1	1.45999	1	977.128	479.488	397.055	515.27	656.671	850.968
A	At1g26310	^CAULIFLOWER^AGL10^ TF ^MADS^Type II (MIKCc)^MADS-box protein, putative strong similarity to DNA-binding protein [Brassica rapa subsp. pekinensis] GI:6469345, SP|Q41276 Floral homeotic protein APETALA1 (MADS C) {Sinapis alba}; contains InterPro accession IPR002100: Transcription factor, MADS-box^	-1.10529	1	-1.4731	1	1.06054	1	-1.60873	0.000715176	-1.36486	1	1288.57	1139.06	825.685	733.417	442.154	354.787
B	At1g26410	^ ^ ^ ^FAD-binding domain-containing protein similar to SP|P30986 reticuline oxidase precursor (Berberine-bridge-forming enzyme) (BBE) (Tetrahydroprotoberberine synthase) [Eschscholzia californica]; contains PF01565 FAD binding domain^	1.02734	1	-1.66148	0.000719505	-1.23186	1	-1.18982	1	-1.00921	1	1990.28	1999.61	1486.85	1384.23	1468.02	1349.98
D	At1g26600	^CLAVATA3/ESR-RELATED 9^protein binding activity^ ^CLE9, putative CLAVATA3/ESR-Related 9 (CLE9); similar to hypothetical protein GB:AAF67770 GI:7705091 from [Arabidopsis thaliana]^	1.07879	1	-1.06585	1	1.2221	2.69094e-05	1.23956	1	1.0301	1	600.157	627.883	610.938	838.644	968.405	928.972
B	At1g26630	^ ^Protein synthesis factors;translation initiation factor activity^eIF5A - eukaryotic initiation factor 5A^eukaryotic translation initiation factor 5A, putative / eIF-5A, putative strong similariy to SP|Q9AXQ6 Eukaryotic translation initiation factor 5A-1 (eIF-5A 1) {Lycopersicon esculentum}^	-1.11145	1	1.41337	1	1.2375	1	-2.48248	5.15671e-06	2.08875	1	27126.5	22835	27041.2	21186.1	18431.9	21448.2
A	At1g26770	^ARABIDOPSIS THALIANA EXPANSIN A10^ Assembly, Architecture, and Growth;Expansins;cell wall loosening (sensu Magnoliophyta) ^Growth modifying proteins;Alpha-Expansin Gene Family^expansin, putative (EXP10) similar to expansin At-EXP1 GI:1041702 from [Arabidopsis thaliana]; alpha-expansin gene family, PMID:11641069^	-2.02238	2.91008e-23	-1.2171	1	1.60743	1	1.00836	1	1.06606	1	9319.98	5081.54	4803.81	5687.08	4736.69	4455.09
D	At1g26945	^ ^ ^ ^expressed protein supported by full length cDNA gi:26453215 from [Arabidopsis thaliana]^	1.34604	1	1.56854	0.0269586	1.23868	1	1.79481	0.162698	-1.04287	1	1241.5	1340.46	1805.32	2126.81	3140.84	3193.34
C	At1g26960	^ ^ ^ TF ^HB^HD-Zip I^homeobox-leucine zipper protein, putative / HD-ZIP transcription factor, putative similar to homeobox-leucine zipper protein HAT7 (HD-ZIP protein 7) (HD-ZIP protein ATHB-3 (SP:Q00466| [Arabidopsis thaliana]; similar to Helianthus annuus gi|349379, and carrot, gi|1435022. Contains Homeobox domain motif^	1.23079	1	-1.11521	1	-1.2998	1	-1.08406	1	-1.78511	3.83789e-07	4429.15	4516.27	5090.21	5075.67	4348.02	2692.9
A	At1g27020	^ ^ ^ ^expressed protein ^	-3.59816	0	-2.21868	7.67462e-08	1.32322	1	-2.82225	1	-1.24822	1	2814.9	1192.22	624.097	463.653	192.194	159.908
E	At1g27030	^ ^ ^ ^expressed protein ^	-2.48731	3.18948e-10	-1.47968	1	2.25377	1	3.72443	6.41808e-37	1.69835	1	1763.75	884.696	538.724	834.865	2667.51	3705.18
B	At1g27120	^ ^Glycosyltransferase Family 31;Glycosyltransferase Gene Families;glycosyltransferase^Glycosyltransferase Family- 31^galactosyltransferase family protein contains Pfam profile:PF01762 galactosyltransferase^	-1.08015	1	1.04688	1	-1.31298	1	-1.24735	1	1.90257	0.000894196	344.129	319.747	323.406	267.498	269.024	298.055
D	At1g27300	^ ^ ^ ^expressed protein ^	1.22483	0.51916	-1.19373	1	1.41439	0.00071847	1.1612	1	-1.1931	1	2332.02	2665.53	2857.43	3722.03	3548.94	3386.15
B	At1g27420	^ ^F-box (FBX);chloroplast^D^kelch repeat-containing F-box family protein similar to MIPP proteins (gi|2191178, sp|P28575); contains Pfam profiles PF01344: Kelch motif, PF00646: F-box domain^	1.16249	1	-1.54052	2.87701e-07	-1.27763	1	1.07553	1	-1.08542	1	1207.72	1570.44	1043.48	823.401	949.189	893.328
D	At1g27540	^ ^chloroplast^ ^F-box family protein similar to F-box protein family, AtFBX7 (GI:20197899) [Arabidopsis thaliana]; confirmed by FLcDNA GI:16604421; contains uncharacterized Arabidoppsis domain shared by 33 Arabidopsis proteins^	1.2751	1	1.14721	1	-1.01718	1	-1.03117	1	1.50342	3.56762e-06	606.549	321.821	1048.55	863.079	2033.49	1799.51
A	At1g27660	^ ^BHLH110^ TF ^bHLH^(-b)HLH^ethylene-responsive protein -related contains similarity to ethylene-inducible ER33 protein [Lycopersicon esculentum] gi|5669656|gb|AAD46413^	-1.60526	0.000266175	1.0397	1	1.24562	1	-1.13683	1	-1.01173	1	621.728	413.811	446.137	531.997	447.438	466.333
C	At1g27760	^ ^ ^ ^interferon-related developmental regulator family protein / IFRD protein family contains Pfam PF05004: Interferon-related developmental regulator (IFRD); similar to IFR1 protein GI:16580630 [Gallus gallus]; similar to Interferon-related developmental regulator 1 (TPA induced sequence 7) (TIS7 protein) (SP:P19182) {Mus musculus}^	1.13754	1	1.08748	1	-1.08048	1	-1.33286	1	1.55377	8.47774e-05	3016.37	2964.31	4073.04	3412.38	3192.62	3687.87
B	At1g28210	^ATJ^mitochondrion^ ^DNAJ heat shock protein, putative strong similarity to mitochondrial DnaJ protein (AtJ1) GI:564030 from [Arabidopsis thaliana]; contains Pfam profiles PF00226: DnaJ domain, PF01556: DnaJ C terminal region, PF00684: DnaJ central domain (4 repeats); identical to cDNA DnaJ homolog AtJ1 (atj) GI:564029^	1.14691	1	-1.14338	1	1.02692	1	1.09125	1	-1.37069	5.6221e-07	2332.97	2523.73	2214.26	2416.42	2580.18	2180.54
E	At1g28230	^PURINE PERMEASE 1^DMT(The Drug/Metabolite Transporter);Organic Solute Cotransporters;purine transporter activity^Purine permease family^purine permease (PUP1) identical to purine permease GI:7620007 from [Arabidopsis thaliana]^	1.18761	1	-1.05768	1	1.08143	1	1.57963	1	1.50175	0.00114066	665.729	778.029	794.901	943.029	1561.94	2179.85
A	At1g28360	^ ^ ^ TF ^AP2/ERF^ERF-EREBP^ERF domain protein 12 (ERF12) identical to ERF domain protein 12(AtERF12) GI:15207791 from [Arabidopsis thaliana]^	-1.65218	1	1.09677	1	1.15586	1	-1.71652	5.76786e-06	1.24722	1	4716.61	3002.82	3145.92	3792.91	2373.84	2518.54
E	At1g28590	^ ^lipase activity^ ^lipase, putative similar to lipase [Arabidopsis thaliana] GI:1145627; contains InterPro Entry IPR001087 Lipolytic enzyme, G-D-S-L family^	1.42081	1	-1.22407	1	-1.08787	1	1.4826	1	1.92457	2.48225e-05	33.8647	38.3933	45.249	48.0553	61.1902	80.913
E	At1g28600	^ ^lipase activity^ ^lipase, putative similar to lipase [Arabidopsis thaliana] GI:1145627; contains InterPro Entry IPR001087 Lipolytic enzyme, G-D-S-L family^	1.02275	1	1.41965	1	1.14189	1	2.11343	4.2536e-06	1.65735	1	242.684	278.313	364.228	319.138	470.953	756.582
A	At1g28660	^ ^endomembrane system^ ^lipase, putative strong similarity to lipase [Arabidopsis thaliana] GI:1145627^	-1.62756	0.0196634	-1.67891	1	1.3019	1	1.07629	1	1.35779	1	441.9	315.375	256.915	284.218	320.006	375.234
B	At1g29320	^ ^ ^ ^transducin family protein / WD-40 repeat family protein contains 3 WD-40 repeats (PF00400); similar to meiotic recombination protein REC14 (GI:11139242) [Homo sapiens]; similar to unknown protein GI:13623493 [Homo sapiens]^	-1.03046	1	-1.07714	1	1.06057	1	-1.1724	1	1.70629	1.73231e-05	1990.44	1635.59	2140.6	1925.58	1648.74	1490.69
D	At1g29460	^ ^SAUR;mitochondrion^ ^auxin-responsive protein, putative similar to auxin-induced protein 6B (SP:P33083) [Glycine max]^	-1.50814	1	1.02241	1	1.57276	5.17204e-06	1.29039	1	-1.17034	1	592.083	424.451	575.286	1054.84	1309.32	1051.77
D	At1g29500	^ ^SAUR;mitochondrion^ ^auxin-responsive protein, putative similar to auxin-induced protein 6B (SP:P33083) [Glycine max]^	-1.28112	1	1.14307	1	1.84545	5.65934e-09	1.65118	0.243338	-1.25153	1	537.919	435.134	529.769	978.225	1359.58	1249.15
B	At1g29560	^ ^ ^ ^expressed protein ; expression supported by MPSS^	-1.03666	1	-1.27981	1	-1.59695	0.00446594	-1.19206	1	1.92071	1	1336.1	1294.06	1355.21	1067.15	1030.24	1111.93
D	At1g29670	^ ^lipase activity^ ^GDSL-motif lipase/hydrolase family protein similar to family II lipase EXL1 GI:15054382 from [Arabidopsis thaliana]; contains Pfam profile: PF00657 Lipase/Acylhydrolase with GDSL-like motif^	-1.56891	5.36754e-10	1.08891	1	1.9051	0.152047	1.29839	1	-1.12909	1	6427.79	4543.2	5204.17	6726.12	6544.55	6203.26
B	At1g30040	^ ^GA^putative gibberellin 2-oxidase^gibberellin 2-oxidase / GA2-oxidase (GA2OX2) identical to GI:4678368 ga2ox2^	-1.21493	1	1.30664	1	1.06834	1	-1.56856	0.00401873	-1.0735	1	1388.74	1370.21	1534.79	1727.62	1130.59	1011.47
B	At1g30100	^ ^abscisic acid biosynthesis^9-CIS-EPOXYCAROTENOID DIOXYGENASE^9-cis-epoxycarotenoid dioxygenase, putative / neoxanthin cleavage enzyme, putative / carotenoid cleavage dioxygenase, putative similar to 9-cis-epoxycarotenoid dioxygenase GI:6715257 from [Phaseolus vulgaris]^	3.13195	4.96099e-18	1.18235	1	-1.41698	1	1.06832	1	1.19301	1	114.74	390.851	378.241	241.265	275.42	303.197
E	At1g30170	^ ^mitochondrion^ ^hypothetical protein contains Pfam profile PF03478: Protein of unknown function (DUF295)^	1.01514	1	1.55924	1	2.21251	0.00240356	1.84809	0.186829	1.25206	1	68.4712	59.4361	79.3206	201.243	422.123	567.026
B	At1g30260	^ ^mitochondrion^ ^expressed protein ^	1.28113	1	1.11294	1	-1.10341	1	-1.33019	1	-1.60222	0.00196152	167.336	211.633	233.933	210.772	175.633	117.136
B	At1g30280	^ ^ ^ ^expressed protein contains low similarity to cyclin G-associated kinase GI:1902912 SP|P97874 from [Rattus norvegicus]^	-1.07114	1	-1.91117	5.26937e-06	-1.09962	1	-1.59267	1	-1.17119	1	452.138	472.987	306.539	191.628	115.771	114.559
A	At1g30320	^ ^chloroplast^ ^remorin family protein contains Pfam domain, PF03763: Remorin, C-terminal region^	-1.5971	0.00207452	1.10855	1	-1.31792	1	-1.35142	0.0324228	1.41829	1	2813.58	2061.19	1873	1391.59	1053.9	1157.77
C	At1g30360	^ ^endomembrane system^ ^early-responsive to dehydration stress protein (ERD4) nearly identical to ERD4 protein (early-responsive to dehydration stress) [Arabidopsis thaliana] GI:15375406; contains Pfam profile PF02714: Domain of unknown function DUF221^	1.29879	1	1.63262	1	1.01219	1	-1.6325	0.0305799	1.10344	1	8284.88	9215.51	12066.6	11288.1	7788.6	7877.13
D	At1g30530	^ ^Glycosyl transferases;Glycosyltransferase Family 1;Glycosyltransferase Gene Families;glycosyltransferase^GT family 1;Glycosyltransferase- Family 1^UDP-glucoronosyl/UDP-glucosyl transferase family protein contains Pfam profile: PF00201 UDP-glucoronosyl and UDP-glucosyl transferase^	-1.28359	1	1.73959	0.000114547	1.06478	1	-1.10389	1	1.03488	1	4181.46	3559.32	6737.82	7946.61	6233.03	7330.43
D	At1g30650	^ ^AtWRKY14^ TF ^WRKY^ ^WRKY family transcription factor contains Pfam profile: PF03106 WRKY DNA -binding domain^	2.14865	3.63064e-07	1.23782	1	1.18531	1	1.04577	1	-1.36571	1	1535.88	2955.87	3968.2	5222.82	5472.93	3957.22
C	At1g30840	^ ^DMT(The Drug/Metabolite Transporter);Organic Solute Cotransporters;purine transporter activity^Purine permease family^purine permease-related low similarity to purine permease [Arabidopsis thaliana] GI:7620007; contains Pfam profiles PF03151: Domain of unknown function, DUF250, PF00892: Integral membrane protein^	2.34321	6.623e-07	1.20177	1	-1.18395	1	-1.8413	1	-1.58566	1	2543.22	4926.41	7274.44	7861.09	4681.78	3371.44
B	At1g30950	^UNUSUAL FLORAL ORGANS^F-box (FBX);meristem organization^C5^unusual floral organ (UFO) / F-box family protein (FBX1) E3 ubiquitin ligase SCF complex F-box subunit; almost identical to unusual floral organs (UFO)GI:4376159 from [Arabidopsis thaliana] Landsberg-erecta; one amino acid difference^	2.30645	4.2156e-21	1.00636	1	-1.21032	1	-1.40577	1	-1.7361	0.0199388	3823.58	8471.97	7128.03	5822.42	4408.84	2336.72
D	At1g31210	AT1G31210_1 putative reverse transcriptase strong similarity to a multitude of putative reverse transcriptases	1.116	1	2.01542	0.000215201	1.26345	1	1.43219	0.131495	1.25056	1	208.653	181.506	276.138	385.624	412.034	534.172
D	At1g31290	^ ^Argonaute^ ^PAZ domain-containing protein / piwi domain-containing protein contains Pfam profiles PF02170: PAZ domain, PF02171: Piwi domain^	1.47046	1	1.85329	1.2138e-09	1.72653	1	1.0098	1	-1.37075	1	69.9769	98.1043	170.073	315.479	346.352	236.626
A	At1g31490	^ ^ ^ ^transferase family protein contains similarity to anthranilate N-hydroxycinnamoyl benzoyltransferase GI:3288180, GI:2239091 from (Dianthus caryophyllus); contains Pfam profile PF02458 transferase family^	-3.87244	0.000143722	-1.16673	1	-1.71637	1	-1.08282	1	2.15575	0.0180685	269.28	84.0781	83.7496	77.2419	84.528	169.966
E	At1g31550	^ ^endomembrane system^ ^GDSL-motif lipase, putative similar to lipase [Arabidopsis thaliana] GI:1145627; contains InterPro Entry IPR001087 Lipolytic enzyme, G-D-S-L family^	-1.21806	1	1.01323	1	1.1201	1	1.26098	1	1.70935	0.00163345	1002.13	910.87	1047.15	1087.1	1114.58	1473.21
A	At1g31710	^ ^endomembrane system^ ^copper amine oxidase, putative similar to copper amine oxidase [Lens culinaris] gi|15451834|gb|AAB34918^	-4.09247	1.66234e-13	-1.68796	1	1.0825	1	-2.27826	1	1.01125	1	468.718	149.81	74.6642	63.4665	35.7036	35.2621
A	At1g31750	^ ^ ^ ^proline-rich family protein contains proline rich extensin domains, INTERPRO:IPR002965^	-2.27182	9.65279e-06	-2.10961	0.00199165	1.23653	1	-1.76453	3.56279e-06	-1.23398	1	4614.81	2472.03	1506.77	1869.92	940.982	893.918
D	At1g32100	^ ^ ^ ^pinoresinol-lariciresinol reductase, putative similar to pinoresinol-lariciresinol reductase TH1 [Tsuga heterophylla][GI:7578915]; contains isoflavone reductase domain PF02716^	-1.60095	6.16425e-06	-1.43109	1	1.75971	1	1.54666	0.78531	-1.81561	1	962.202	767.735	631.586	1300.66	1760.99	974.384
A	At1g32240	^KANADI2^ ^ TF ^GARP^ ^myb family transcription factor (KAN2) contains Pfam profile: PF00249 myb-like DNA-binding domain; identical to cDNA GARP-like putative transcription factor KANADI2 (KAN2) GI:15723594^	-1.11943	1	-1.40396	0.0171383	1.14284	1	-1.03532	1	1.22559	1	5524.88	4225.95	3731.4	4094.3	3291.84	4451.2
A	At1g32280	^ ^Acyl Lipid Metabolism;endomembrane system^Lipid Transfer Protein type 3^protease inhibitor/seed storage/lipid transfer protein (LTP) family protein contains Pfam protease inhibitor/seed storage/LTP family domain PF00234^	-1.97784	1.21118e-09	-4.17732	3.89805e-12	-1.07077	1	-6.60438	1.88925e-21	1.07555	1	4280.92	2337.86	705.289	550.636	102.32	89.2492
A	At1g32450	^ ^POT(Proton-dependent Oligopeptide Transporter);Organic Solute Cotransporters;transporter activity^Similar to LeOPT1 family^proton-dependent oligopeptide transport (POT) family protein contains Pfam profile: PF00854 POT family^	-1.69915	0.000313565	-1.40243	1	1.01285	1	-1.37434	1	-1.01556	1	212.631	163.176	146.164	149.096	126.412	111.79
E	At1g32780	^ ^electron transport^ ^alcohol dehydrogenase, putative similar to alcohol dehydrogenase GB:CAA37333 GI:297178 from [Solanum tuberosum]; contains Pfam zinc-binding dehydrogenase domain PF00107^	-1.20869	1	1.01412	1	1.67261	1	2.19992	1	1.85174	5.79597e-05	72.7832	67.8482	62.9876	113.388	282.044	596.967
B	At1g32800	^ ^putative DNA-binding protein;DNA binding activity^ ^PHD finger protein-related contains low similarity to PHD-finger domain proteins^	-1.0473	1	-1.08381	1	-2.65089	9.37942e-15	-1.32211	1	1.07898	1	896.372	941.832	1350.68	774.846	1025.44	1076.8
B	At1g33080	^ ^MATE(Multi Antimicrobial Extrusion)^ ^MATE efflux family protein similar to ripening regulated protein DDTFR18 [Lycopersicon esculentum] GI:12231296; contains Pfam profile PF01554: Uncharacterized membrane protein family^	1.18141	1	-1.34517	0.00110411	-1.10214	1	-1.24817	1	-1.3524	1	805.763	836.536	720.195	599.694	522.091	419.331
E	At1g33170	^ ^mitochondrion^ ^dehydration-responsive family protein similar to early-responsive to dehydration stress ERD3 protein [Arabidopsis thaliana] GI:15320410; contains Pfam profile PF03141: Putative methyltransferase^	-2.18706	1.75821e-06	1.25986	1	1.47464	4.13416e-07	1.83231	9.22254e-26	1.06193	1	1163.88	592.864	708.323	991.202	1858.28	2627.51
E	At1g33590	^ ^endomembrane system^ ^disease resistance protein-related / LRR protein-related contains leucine rich-repeat domains Pfam:PF00560, INTERPRO:IPR001611; similar to Hcr2-5D [Lycopersicon esculentum] gi|3894393|gb|AAC78596^	-2.17617	2.62571e-15	1.16186	1	1.29613	1	-1.37459	1	-1.00935	1	6373.6	3616.72	3943.34	5910.94	6039.96	7369.79
A	At1g33700	^ ^ ^ ^expressed protein contains Pfam domain PF04685: Protein of unknown function, DUF608^	-2.10433	0.0423565	-2.23276	2.83211e-15	-1.04739	1	-1.70927	3.35047e-06	-1.00886	1	668.199	355.449	218.878	195.025	123.325	123.959
E	At1g33811	^ ^endomembrane system^ ^GDSL-motif lipase/hydrolase family protein similar to family II lipases EXL3 GI:15054386, EXL1 GI:15054382, EXL2 GI:15054384 from [Arabidopsis thaliana]; contains Pfam profile PF00657: GDSL-like Lipase/Acylhydrolase^	1.22022	1	-1.37168	1	1.03439	1	1.18168	1	4.41143	9.99889e-21	85.6842	103.226	86.6399	96.6333	158.57	658.483
E	At1g34245	^ ^endomembrane system^ ^expressed protein ^	1.67426	1	-1.06513	1	-1.11394	1	2.5123	2.26454e-29	1.1804	1	1022.68	1566.57	1395.5	1567.06	4405.69	4779.95
E	At1g34580	^ ^SUGAR TRANSPORTERS;MFS(Major Facilitator);Organic Solute Cotransporters;carbohydrate transporter activity^MONOSACCHARIDE-H+ SYMPORTERS;Putative sugar transporter family^monosaccharide transporter, putative similar to monosaccharide transporter 3 [Oryza sativa] GI:11991114, monosaccharide transporter [Nicotiana tabacum] GI:19885, monosaccharide transporter 1 [Oryza sativa] GI:11991110; contains…	1.1776	1	-1.02082	1	-1.27643	1	2.47545	0.0305799	2.3653	1	47.2146	47.0236	47.9548	49.5787	86.8196	211.075
B	At1g35280	At1g35280 CACTA-element transposase -related	1.72812	1	1.96744	1	1.00092	1	1.75914	1	-4.12522	0.0271838	84.0148	160.255	112.975	104.781	213.909	70.9454
A	At1g35290	^ ^chloroplast^ ^thioesterase family protein contains Pfam profile PF03061: thioesterase family protein^	-1.66179	1	-2.04949	1	-1.43413	1	-1.38663	1	-2.36418	2.8338e-20	4765.8	3441.22	1795.58	1504.29	1041.76	498.281
B	At1g35660	^ ^ ^ ^expressed protein ^	1.03246	1	-1.20865	1	-1.25227	1	-1.27229	1	1.73237	4.3254e-10	976.639	1073.18	786.87	539.721	556.191	722.458
E	At1g35730	^ ^ ^ ^pumilio/Puf RNA-binding domain-containing protein ^	-1.20236	1	1.86704	1	2.18961	1	1.17321	1	1.68956	0.00237696	90.8583	83.4869	128.75	215.254	303.14	571.196
A	At1g35750	^ ^ ^ ^pumilio/Puf RNA-binding domain-containing protein ^	-1.94946	0.000432058	-1.33802	1	-1.11819	1	-1.2395	1	-1.18867	1	236.214	160.182	117.52	129.019	97.6093	72.2986
B	At1g35910	^ ^ trehalose biosynthesis;trehalose degradation, low osmolarity;trehalose anabolism ^TREHALOSE-PHOSPHATASE^trehalose-6-phosphate phosphatase, putative similar to trehalose-6-phosphate phosphatase (AtTPPB) [Arabidopsis thaliana] GI:2944180; contains Pfam profile PF02358: Trehalose-phosphatase^	-1.21541	1	-1.26022	1	-1.4214	0.0232277	-1.9087	1.50622e-15	-1.24013	1	1730.65	1551.16	1231.77	889.015	503.866	335.471
C	At1g36390	^ ^heat shock protein activity^ ^co-chaperone grpE family protein similar to co-chaperone CGE1 precursor isoform b [Chlamydomonas reinhardtii] GI:15384279; contains Pfam profile PF01025: co-chaperone GrpE^	-1.01076	1	1.22379	1	-1.05501	1	-1.15818	1	1.56158	0.0390276	1658.95	1587.37	1783.76	2043.55	1622.09	2236.75
B	At1g36940	^ ^ ^ ^hypothetical protein ^	1.25904	1	-1.29144	1	-1.07916	1	-1.68457	0.00208497	-1.35639	1	2923.46	3438.96	2951.81	2311.55	1122.37	919.891
A	At1g37140	^ ^chloroplast^ ^RNA-binding protein, putative similar to terminal ear1 GI:3153237 from [Zea mays]^	-1.57711	0.00291675	-1.1258	1	-1.27875	1	1.00458	1	1.18692	1	1880.11	1323.49	1170.09	1108.99	939.826	1079.16
E	At1g41830	^SKS6^OFeT(Oxidase-dependent Fe2+ Transporter);endomembrane system^ ^multi-copper oxidase type I family protein similar to pollen-specific BP10 protein [SP|Q00624][Brassica napus]; contains Pfam profile: PF00394 Multicopper oxidase^	-1.20954	1	1.66913	0.00654081	1.57173	3.79438e-14	1.69379	1	1.26285	1	891.049	829.479	1151.12	1554.47	2581.88	4009.24
B	At1g42680	^ ^motor activity^ ^myosin-related contains similarity to myosin GI:433663 from [Arabidopsis thaliana]^	1.01329	1	2.91583	1	-5.67005	0	-1.61447	1	1.28004	1	338.88	545.062	689.349	128.001	326.983	245.55
C	At1g42990	^ ^AtbZIP60^ TF ^bZIP^ ^bZIP transcription factor family protein contains Pfam profile: PF00170: bZIP transcription factor^	1.25002	1	1.14017	1	1.05316	1	1.18528	1	-1.38175	1.86256e-05	5126.05	6057.07	5423.65	6665.44	6864.08	5631.86
C	At1g43000	^ ^ ^ TF ^PLATZ (Zn)^ ^zinc-binding family protein similar to zinc-binding protein [Pisum sativum] GI:16117799; contains Pfam profile PF04640 : Protein of unknown function, DUF597^	3.16962	0.0171021	1.74525	0.000153858	-1.05048	1	-1.76346	0.00031019	-1.51433	1	60.8531	162.493	206.48	172.346	117.806	74.3523
A	At1g43205	^ ^ ^ ^hypothetical protein ^	-1.71011	1.79724e-05	1.57404	1	-1.1006	1	1.12233	1	1.61005	1	828.568	574.914	518.3	356.007	373.207	438.444
A	At1g44100	^ ^AAAP(Amino Acid/Auxin Permease);Organic Solute Cotransporters;AAAP family;amino acid permease activity^Amino acid permease family^amino acid permease 5, putative (AAP5) nearly identical to amino acid permease (AAP5) GI:608673 from [Arabidopsis thaliana]^	-1.49776	0.51916	-1.74594	2.41499e-10	-1.02356	1	1.68379	0.00441465	1.07658	1	2445.75	1671.09	1157.58	1276.62	1846.24	1827.48
A	At1g44800	^ ^DMT(The Drug/Metabolite Transporter);Nodulin-like protein family;membrane^ ^nodulin MtN21 family protein similar to MtN21 [Medicago truncatula] GI:2598575; contains Pfam profile PF00892: Integral membrane protein^	-2.05953	3.328e-12	1.22806	1	1.54154	1	-1.08411	1	-1.39785	1	696.293	452.978	495.537	561.405	562.731	614.861
B	At1g45150	^ ^ ^ ^expressed protein ^	1.02693	1	-1.10173	1	-1.0405	1	1.08372	1	-1.36401	0.0353412	2697.31	2994.59	2850.61	2524.71	2537.09	2048.07
E	At1g45191	^ ^ ^ ^glycosyl hydrolase family 1 protein Since this genomic sequence region is unfinished, the annotated gene may be missing a stop codon or start codon^	-1.84585	1	-1.13897	1	1.05842	1	2.11634	0	1.59744	1	455.149	312.997	286.041	328.069	777.087	1262.4
D	At1g45688	^ ^chloroplast^ ^expressed protein ^	-1.10304	1	1.13069	1	1.06865	1	-1.2095	1	1.44556	0.00555891	2600.12	2422.81	2934.17	3645.46	2980.92	3528.3
A	At1g46264	^ ^AtHsfB4^ TF ^HSF^ ^heat shock transcription factor family protein contains Pfam profile: PF00447 HSF-type DNA-binding domain^	-1.27015	1	-1.66285	0.0290631	1.2444	1	-1.01621	1	1.18104	1	7753.55	5703.24	4296.24	4696.53	3741.13	3912.34
C	At1g47485	^ ^endomembrane system^ ^expressed protein ^	2.45927	7.18686e-12	-1.05715	1	-1.30123	1	-1.13527	1	-1.45778	1	167.337	391.209	437.416	316.374	274.436	202.705
D	At1g47610	^ ^ ^ ^transducin family protein / WD-40 repeat family protein contains 7 WD-40 repeats (PF00400); similar to En/Spm-like transposon protein (GI:2739374) [Arabidopsis thaliana]^	6.50723	3.38887e-21	1.62051	1	1.47971	1	1.22351	1	-1.25271	1	181.11	1037.67	1452.83	1521.92	1894.5	1602.81
C	At1g47760	^ ^AGL102^ TF ^MADS^Type I^MADS-box protein (AGL102) contains similarity to MADS-box protein GB:AAC26702 GI:3128222 from [Arabidopsis thaliana]; contains Pfam profile PF00319: SRF-type transcription factor (DNA-binding and dimerisation domain)^	1.1462	1	-1.16941	1	-1.47806	1	1.00424	1	-1.46094	0.0398172	509.848	657.461	893.815	830.674	754.126	549.874
D	At1g47860	AT1G47860_1 hypothetical protein similar to putative non-LTR retroelement reverse transcriptase GB AAC33226 GI 3461840 from Arabidopsis thaliana	1.2362	1	1.67089	5.74819e-06	1.14469	1	1.06102	1	1.15941	1	180.939	238.621	405.713	449.231	476.498	461.603
B	At1g48120	^ ^Serine/Threonine (ST) phosphatases;protein serine/threonine phosphatase activity^ ^calcineurin-like phosphoesterase family protein contains Pfam profile: PF00149 calcineurin-like phosphoesterase^	-1.04894	1	1.07062	1	-1.00672	1	-1.18781	1	1.83084	3.55137e-10	1143.93	1297.13	1269.49	977.475	1020.79	1267.95
B	At1g48410	^ARGONAUTE1^Argonaute;Protein synthesis factors;posttranscriptional gene silencing^eIF2C - eukaryotic initiation factor 2C^argonaute protein (AGO1) identical to SP|O04379 Argonaute protein (AGO1) {Arabidopsis thaliana}; contains Pfam profiles PF02171: Piwi domain, PF02170: PAZ domain^	-1.01749	1	1.08073	1	1.09175	1	-1.27347	8.17309e-05	-1.09647	1	3479.18	3001.35	3525.97	3551.19	3055.33	3152.07
E	At1g48470	^ ^glutamine biosynthesis;ammonium assimilation;nitrate assimilation pathway;glutamine biosynthesis I^glutamine synthetase;GLUTAMINE SYNTHETASE^glutamine synthetase, putative similar to glutamine synthetase, cytosolic isozyme (glutamate-- ammonia ligase, GS1) [Arabidopsis thaliana] SWISS-PROT:Q9LVI8^	-1.17433	1	-1.29778	1	1.32297	1	1.2404	1	2.39637	0.000145571	35.5499	46.6026	48.9168	56.3651	57.2788	108.548
E	At1g48660	^ ^Acyl-activating enzymes (AAE)^Clade III^auxin-responsive GH3 family protein similar to auxin-responsive GH3 product [Glycine max] GI:18591; contains Pfam profile PF03321: GH3 auxin-responsive promoter^	-1.21354	1	1.14836	1	1.18769	1	3.14333	5.53601e-38	1.64483	1	117.047	100.455	122.815	222.977	651.282	816.267
C	At1g48860	^ ^chorismate biosynthesis^ ^3-phosphoshikimate 1-carboxyvinyltransferase, putative / 5-enolpyruvylshikimate-3-phosphate, putative / EPSP synthase, putative strong similarity to 5-enolpyruvylshikimate-3-phosphate (EPSP) synthase SP|P05466 from (Arabidopsis thaliana)^	-1.0612	1	1.45559	0.000541702	-1.21495	1	-1.38084	1	-1.13981	1	1233	1387.26	1782.3	1887.79	1458.33	1506.62
B	At1g48960	^ ^ ^ ^universal stress protein (USP) family protein contains Pfam PF00582: universal stress protein family; similar to hypothetical protein GI:7770340 from [Arabidopsis thaliana]^	-1.05146	1	-1.04967	1	1.04944	1	-1.34546	0.0149379	-1.15411	1	1635.74	1641.65	1214.35	1201.59	1019.61	909.944
B	At1g49230	^ ^ ^ ^zinc finger (C3HC4-type RING finger) family protein contains Pfam domain, PF00097: Zinc finger, C3HC4 type (RING finger)^	1.42726	1.3189e-06	-1.52815	0.0014806	-1.21785	1	-2.22836	8.92038e-08	-1.36624	1	383.806	549.526	408.548	251.982	141.448	111.183
B	At1g49340	^ ^inositol/phosphatidylinositol kinase activity^ ^phosphatidylinositol 3- and 4-kinase family protein contains similarity to phosphatidylinositol 4-kinase 230 GI:2326227 from [Homo sapiens], from [Bos taurus] GI:2198791; contains Pfam profiles PF00454: Phosphatidylinositol 3- and 4-kinase, PF00613: Phosphoinositide 3-kinase family, accessory domain^	-1.17886	1	1.6752	1	-2.11629	2.213e-17	-1.13464	1	-1.08572	1	408.451	454.142	521.022	349.156	460.128	445.833
A	At1g49450	^ ^ ^ ^transducin family protein / WD-40 repeat family protein contains 7 WD-40 repeats (PF00400); similar to En/Spm-like transposon protein GI:2739374 from [Arabidopsis thaliana]; no characterized homologs^	-1.88828	0.00370365	-1.17265	1	-1.21761	1	-1.79953	4.85755e-05	1.69952	1	1658.44	1047.3	911.516	721.825	491.169	631.498
A	At1g49830	^ ^ ^ TF ^bHLH^bHLH^ethylene-responsive protein -related similarity to ER33 protein [Lycopersicon esculentum] GI:5669656^	-1.45226	4.30499e-05	-1.28323	1	1.06226	1	-1.16359	1	1.08632	1	905.167	673.279	512.803	451.656	362.907	380.823
E	At1g49975	^ ^chloroplast^ ^expressed protein ^	-1.13052	1	1.05339	1	1.10409	1	1.66257	0.000651679	1.56159	1	2692.09	2515.39	2423.38	2745.62	3438.83	3522.35
A	At1g50060	^ ^branched-chain amino acid aminotransferase activity^ ^pathogenesis-related protein, putative similar to prb-1b [Nicotiana tabacum] GI:19970; contains Pfam profile PF00188: SCP-like extracellular protein^	1.17328	1	1.27149	1	1.24289	1	1.25374	1	-1.66287	0.00110622	267.282	203.837	183.4	212.07	261.93	172.721
B	At1g50290	^ ^ATP binding activity^ ^expressed protein ^	-1.15304	1	-1.19143	1	-1.09813	1	-1.58744	0.00370216	-1.36262	1	18028.9	16183.9	11160.7	12373.2	11220.1	8631.57
B	At1g50460	^ ^hexokinase activity^ ^hexokinase, putative similar to hexokinase 1 [Spinacia oleracea] Swiss-Prot:Q9SEK3^	-1.49535	0.010173	-1.27838	1	-1.01514	1	-1.11786	1	-1.02464	1	6332.73	5397.54	5220.89	4842.89	5123.9	5310.73
A	At1g51270	^ ^structural molecule activity^ ^vesicle-associated membrane protein, putative / VAMP, putative similar to VAP27 GI:6688926 [Nicotiana plumbaginifolia]^	1.03906	1	-1.02844	1	1.27504	0.00165959	-1.20325	1	1.09809	1	2829.53	2316.03	2019.08	2564.68	2043.59	2432.18
E	At1g51805	^ ^LRR I ;endomembrane system^ ^leucine-rich repeat protein kinase, putative similar to light repressible receptor protein kinase [Arabidopsis thaliana] gi|1321686|emb|CAA66376; contains leucine rich repeat (LRR) domains, Pfam:PF00560; contains protein kinase domain, Pfam:PF00069^	-1.15298	1	-1.1075	1	1.06265	1	1.45353	1	2.25581	1.25036e-12	89.8512	65.4933	60.5118	46.6555	73.6329	189.241
C	At1g52030	^MYROSINASE-BINDING PROTEIN 2^ ^ ^myrosinase-binding protein, putative (F-ATMBP) identical to SP|Q9SAV1 Myrosinase binding protein-like f-AtMBP [Arabidopsis thaliana]; similar to myrosinase binding protein GI:1711295 from [Brassica napus]; contains Pfam PF01419: Jacalin-like lectin domain; identical to cDNA myrosinase-binding protein-like protein (MBP1.2) GI:6760446^	2.81318	2.06651e-05	3.87261	0.096452	-1.23656	1	-1.6459	1	1.17712	1	3272.68	5639.59	11777.4	8905.54	8177.75	7453.03
A	At1g52140	^ ^ ^ ^expressed protein ^	-1.40499	6.48099e-06	-1.01571	1	1.13415	1	-1.36107	0.00101154	-1.14297	1	703.28	542.034	493.047	492.043	376.161	371.242
B	At1g52190	^ ^POT(Proton-dependent Oligopeptide Transporter);Organic Solute Cotransporters;transporter activity^Similar to LeOPT1 family^proton-dependent oligopeptide transport (POT) family protein contains Pfam profile: PF00854 POT family^	-1.15394	1	-1.9238	0.00566822	-1.94377	0.52922	-1.15921	1	-1.42271	0.000599781	13071.2	13490.2	6701.17	4894.77	5380.09	3903.68
B	At1g52360	^ ^coatomer^ ^coatomer protein complex, subunit beta 2 (beta prime), putative contains 7 WD-40 repeats (PF00400) (1 weak); similar to (SP:O55029) Coatomer beta' subunit (Beta'-coat protein) (Beta'-COP) (p102) (SP:O55029) [Mus musculus]; similar to GI:298096 from [Homo sapiens]^	-1.09415	1	-1.30311	1	-1.70994	1	-1.21997	1	1.89532	6.72008e-08	1238.39	1363.67	1893.03	1010.03	1142.42	1015.08
C	At1g52400	^ BETA-1,3-GLUCANASE 1 ^glucosidase;Glycoside Hydrolase Family 1;Glycoside Hydrolase Gene Families;endomembrane system^Glycoside Hydrolase Family 1^glycosyl hydrolase family 1 protein / beta-glucosidase, putative (BG1) contains Pfam PF00232 : Glycosyl hydrolase family 1 domain; TIGRFAM TIGR01233: 6-phospho-beta-galactosidase; identical to GI:6651430 from [Arabidopsis thaliana]^	-1.08996	1	2.13323	9.48028e-07	-1.40475	1	-1.74665	1	-1.95356	7.86738e-05	19075.5	12022.9	22845.7	23065.1	16378.2	15422.5
B	At1g52620	^ ^chloroplast^ ^pentatricopeptide (PPR) repeat-containing protein contains Pfam profile PF01535: PPR repeat^	1.10661	1	-1.0548	1	-1.48891	0.0434961	-1.07139	1	1.34384	1	543.288	648.916	643.936	547.452	615.893	625.274
E	At1g52910	^ ^endomembrane system^ ^expressed protein ^	1.10616	1	1.12855	1	1.02191	1	1.10374	1	1.51442	5.6091e-11	186.202	212.165	207.941	197.43	211.303	325.542
B	At1g52980	^ ^ATP binding activity^ ^GTP-binding family protein contains Pfam domain, PF01926: GTPase of unknown function^	-1.10292	1	-1.39647	1	-1.13906	1	-1.15865	1	1.5426	0.00130753	4662.72	4504.37	4415.21	3523.85	3398.96	3316.85
D	At1g53070	^ ^protein kinase activity^ ^legume lectin family protein contains Pfam domain, PF00139: Legume lectins beta domain^	-1.38773	1	1.22079	1	1.56078	0.0196219	1.05096	1	1.27148	1	4886.03	3557.43	4636.08	6556	7322.2	7925.3
E	At1g53080	^ ^protein kinase activity^ ^legume lectin family protein ^	-1.2864	1	1.22591	1	2.97284	0.0226711	3.24441	1.91198e-36	1.25201	1	43.3333	34.0674	49.2292	124.867	350.826	501.171
B	At1g53110	^ ^ ^ ^expressed protein ^	1.21487	1	-1.09882	1	1.24726	1	1.15211	1	-1.43204	0.00664196	2283.44	2959.65	2642.57	2534	2537.95	2074.76
B	At1g53120	^ ^mitochondrion^ ^RNA-binding S4 domain-containing protein ^	-1.07534	1	-1.37631	0.0017216	-1.33477	1	-1.04709	1	1.11105	1	6204.8	6634.14	5670.61	4575.09	5469.25	5498.74
E	At1g53230	^ ^TCP3^ TF ^TCP^TEO-type^TCP family transcription factor 3 (TCP3) identical to transcription factor 3 (TCP3) [Arabidopsis thaliana] (GI:3243274); similar to flower development protein cycloidea (cyc3) GI:6358611 from [Misopates orontium]^	1.21361	1	1.14692	1	1.62966	1	1.90748	1.03047e-12	1.52085	1	411.934	565.06	572.932	844.39	1794.5	2467.73
A	At1g53560	^ ^ ^ ^expressed protein ^	1.10122	1	-1.61643	1	-1.1237	1	-1.4413	0.00449378	1.18699	1	992.454	999.771	510.484	449.256	387.5	425.669
B	At1g54060	^ ^ ^ TF ^Trihelix^ ^expressed protein similar to 6b-interacting protein 1 (NtSIP1) [Nicotiana tabacum] GI:18149189^	-1.03714	1	-1.47895	1	-1.40829	1	-1.16309	1	1.84046	3.01461e-08	2338.27	2588.46	2977.65	2620.96	2380.99	2304.49
C	At1g54530	^ ^EF-hand containing proteins:Group III;calcium ion binding activity^ ^calcium-binding EF hand family protein contains INTERPRO:IPR002048 calcium-binding EF-hand domain^	-1.05612	1	-1.05594	1	-1.19392	1	-1.03414	1	-1.60688	0.0329725	673.172	754.461	916.703	923.434	868.984	654.917
D	At1g55110	^ ^ ^ TF ^C2H2 (Zn)^ ^zinc finger (C2H2 type) family protein contains Pfam domain, PF00096: Zinc finger, C2H2 type^	1.26519	1	-1.32347	1	1.29458	1	1.45015	7.89248e-06	1.01839	1	5468.67	7569.25	7756.23	8588.38	9710.21	10410.2
D	At1g55330	^ ^GPI-anchored protein;Structural proteins;endomembrane system^AG peptides;Arabinogalactan-proteins (AGPs)^arabinogalactan-protein (AGP21) ^	2.0543	5.70348e-05	1.12266	1	1.1083	1	1.13323	1	1.40336	1	5817.27	11942.9	10568.7	10401	14017.3	14230.2
C	At1g55380	^ ^chloroplast^ ^DC1 domain-containing protein contains Pfam profile PF03107: DC1 domain^	1.14233	1	1.20094	1	1.01036	1	1.43949	0.00810971	1.15126	1	259.489	229.686	265.7	329.619	270.209	242.307
E	At1g55690	^ ^endomembrane system^ ^SEC14 cytosolic factor family protein / phosphoglyceride transfer family protein similar to similar to phosphatidylinositol transfer-like protein IV (GI:14486707) [Lotus japonicus] and Phosphatidylinositol Transfer Protein GB:2780955 GI:2780955 [Saccharomyces cerevisiae]^	-1.26389	1	1.47137	0.0306437	1.07642	1	1.34294	1	-1.1323	1	2732.62	2376.54	2854.25	2697.38	3605.35	4224.46
B	At1g55805	^ ^ ^ ^BolA-like family protein contains Pfam profile: PF01722 BolA-like protein^	-1.02567	1	-1.12503	1	1.02184	1	1.21372	1	-1.33076	0.0358673	14986.4	13509.8	12689.2	12737.9	13145.3	11411.4
A	At1g55810	^ ^Glycoside Hydrolase Gene Families;uracil phosphoribosyltransferase activity;pyrimidine ribonucleotide/ribonucleoside metabolism^Glycoside Hydrolase Family 36;URACIL PHOSPHORIBOSYLTRANSFERASE^uracil phosphoribosyltransferase, putative / UMP pyrophosphorylase, putative / UPRTase, putative similar to SP|O65583 Uracil phosphoribosyltransferase (EC 2.4.2.9) (UMP pyrophosphorylase) (UPRTase) {Arabid…	-2.02939	1.33071e-29	-1.135	1	-1.04116	1	-1.2695	1	-1.03087	1	1573.25	1102.81	1027.63	922.456	803.567	784.755
C	At1g56075	AT1G56075_1 elongation factor putative similar to ELONGATION FACTOR 2 GB O14460 from Schizosaccharomyces pombe supported by cDNA gi_14334675_gb_AY035011_1_	-1.26853	1	-1.1537	1	1.30215	1	2.71131	0.00502151	1.3437	1	20520.5	16888.8	23635.8	22027.2	17995.1	17546.7
A	At1g56150	^ ^SAUR;mitochondrion^ ^auxin-responsive family protein similar to SP:P33082 Auxin-induced protein X15. [Soybean] {Glycine max}^	-2.39954	3.92644e-08	-1.86386	0.0917293	1.55639	1	-1.26864	1	1.12316	1	529.601	230.339	129.797	182.408	150.828	165.885
C	At1g56170	^ ^ ^ TF ^CCAAT-box binding factor^HAP5^transcription factor, putative similar to Transcription factor GB:CAA74053 GI:2398533 from [Arabidopsis thaliana] similarity to transcription factor Hap5a similar to transcription factor Hap5a [Arabidopsis thaliana](GI:6523090)^	1.12282	1	1.30776	0.000544337	1.0245	1	-1.14327	1	-1.00895	1	5124.38	6230.72	7296.08	7214.56	5850.86	5834.38
A	At1g56430	^ ^ ^ ^nicotianamine synthase, putative similar to nicotianamine synthase [Lycopersicon esculentum][GI:4753801], nicotianamine synthase 2 [Hordeum vulgare][GI:4894912]^	-5.95288	1.4748e-17	-1.1427	1	1.5267	1	-1.72954	1	-1.06194	1	499.005	98.6252	79.4873	94.6406	46.5105	44.4107
E	At1g56630	^ ^Acyl Lipid Metabolism;lipase activity^Lipid Acylhydrolase-like^lipase class 3 family protein contains Pfam profile PF01764: Lipase^	-1.08083	1	-1.01962	1	1.13772	1	2.45862	1.15031e-05	1.13128	1	117.288	94.5163	89.1355	114.312	226.669	200.8
A	At1g56660	^ ^ ^ ^expressed protein ^	-1.49799	1	-1.85808	0.031435	-1.23322	1	-1.13256	1	1.44303	1	1286.42	846.267	896.842	997.862	821.556	682.06
E	At1g56720	^ ^RLCK V ;protein kinase activity^ ^protein kinase family protein contains protein kinase domain, Pfam:PF00069^	-1.29389	1	1.04044	1	-1.12395	1	1.68681	1	1.78241	0.00128637	2361.72	1762.73	2005.86	2411.28	3433.91	4689.05
D	At1g57560	^ ^AtMYB50^ TF ^MYB-(R1)R2R3^ ^myb family transcription factor (MYB50) similar to DNA-binding protein GI:19058 from [Hordeum vulgare]^	1.55507	1	1.90271	1	2.31002	0.000869984	1.00013	1	-1.13479	1	74.4373	114.413	208.809	411.023	443.131	345.674
B	At1g58050	^ ^chloroplast^ ^helicase domain-containing protein contains similarity to SP|P24785 Dosage compensation regulator (Male-less protein) (No action potential protein) {Drosophila melanogaster}; contains Pfam profiles PF04408: Helicase associated domain (HA2), PF00271: Helicase conserved C-terminal domain^	-1.04665	1	-1.30608	1	-1.70749	0.00204485	-1.38726	1	-1.16072	1	489.213	503.225	526.863	333.022	348.181	258.643
A	At1g58270	^ ^endomembrane system^ ^meprin and TRAF homology domain-containing protein / MATH domain-containing protein similar to ubiquitin-specific protease 12 [Arabidopsis thaliana] GI:11993471; contains Pfam profile PF00917: MATH domain^	-1.77634	7.05485e-08	-1.71054	1	1.00917	1	-1.15482	1	1.36801	1	811.72	480.452	415.487	385.534	289.118	377.094
B	At1g58310	^ ^F-box (FBX);calcium ion binding activity^B7^F-box family protein contains F-box domain Pfam:PF00646^	1.06336	1	-1.67109	0.00495419	-1.23799	1	-2.45744	3.61923e-07	-1.91158	4.21465e-08	1976.34	1997.64	1331.13	1141.54	664.253	355.122
A	At1g58340	^ZF14^MATE(Multi Antimicrobial Extrusion)^ ^MATE efflux protein-related contains Pfam profile: PF01554 uncharacterized membrane protein family UPF0013^	-2.8159	2.44334e-18	-1.01834	1	-1.2021	1	-1.35217	1	-1.29244	1	3216.38	1434.39	1395.64	1414.28	1005.3	1007.66
B	At1g58360	^NEUTRAL AMINO ACID TRANSPORTER 2^AAAP(Amino Acid/Auxin Permease);Organic Solute Cotransporters;AAAP family;plasma membrane^Amino acid permease family^amino acid permease I (AAP1) identical to amino acid permease I GI:22641 from [Arabidopsis thaliana]^	-1.00978	1	-1.21817	1	-1.19772	1	-1.35583	6.29875e-06	1.1675	1	3041.25	2975.52	3124.35	3131.4	2537.67	2715.6
E	At1g58430	^RXF26^endomembrane system^ ^GDSL-motif lipase/hydrolase family protein similar to family II lipases EXL3 GI:15054386, EXL1 GI:15054382, EXL2 GI:15054384 from [Arabidopsis thaliana]; contains Pfam profile PF00657: GDSL-like Lipase/Acylhydrolase^	-1.41259	1	1.23212	1	1.53645	1	2.56625	1.24464e-16	6.85106	1.24285e-16	155.443	124.009	143.209	286.716	1142.18	6314.09
E	At1g58460	^ ^ ^ ^expressed protein ^	-2.13044	1.0224e-06	-1.29825	1	1.73597	1	1.2063	1	1.31131	1	728.088	331.012	266.771	405.659	550.381	843.013
D	At1g60060	^ ^ ^ ^expressed protein ^	2.92494	1.68151e-38	1.59817	0.0154215	2.32364	0	1.68109	0.0257098	1.18691	1	234.755	682.689	953.287	2168.37	3179.5	4312.03
A	At1g60270	AT1G60270_1 glycosyl hydrolase family 1 similar to beta-glucosidase GI 9758949 from Arabidopsis thaliana	-3.54494	1.53341e-17	1.38739	1	1.33474	1	-1.36721	1	-1.13693	1	202.338	66.6587	85.6616	94.271	72.1814	72.0851
B	At1g60530	^ ^ATP binding activity^ ^dynamin family protein similar to mx2 protein GI:5578742 from [Mus musculus musculus]; contains Pfam profile PF00350: Dynamin family^	-1.37786	1	2.00805	1	-3.02062	2.90387e-05	-1.06013	1	1.38039	1	546.634	509.332	555.245	174.187	162.537	102.467
B	At1g60540	^ ^GTPase activity^ ^dynamin family protein similar to SP|Q91192 Interferon-induced GTP-binding protein Mx {Oncorhynchus mykiss}; contains Pfam profiles PF01031: Dynamin central region, PF00350: Dynamin family, PF02212: Dynamin GTPase effector domain^	-1.06835	1	-1.25804	1	-1.2742	1	-2.1748	0.00147179	1.01108	1	3423.59	2834.83	2615.58	1647.39	773.105	616.754
D	At1g60590	^ ^Glycoside Hydrolase Family 28;Glycoside Hydrolase Gene Families;chloroplast^Glycoside Hydrolase Family 28^polygalacturonase, putative / pectinase, putative similar to polygalacturonase PG1 (GI:5669846), PG2 (GI:5669848) from [Glycine max]; contains PF00295: Glycosyl hydrolases family 28 (polygalacturonases)^	-1.1262	1	1.67283	0.00709584	1.46651	0.062573	1.63635	0.0447967	-1.09848	1	740.707	713.422	1146.21	1787.7	3153.62	2760.24
A	At1g60630	^ ^LRR III ;Receptor kinase-like protein family;kinase activity^ ^leucine-rich repeat family protein similar to receptor kinase GI:498278 from [Petunia integrifolia]; contains protein kinase domain, Pfam:PF00069; contains leucine-rich repeats, Pfam:PF00560^	-1.61302	0.00251294	-1.11499	1	1.30143	1	-1.00013	1	1.2939	1	1382.49	882.564	867.435	1098.42	993.111	1201.33
A	At1g60680	^ ^VIC-Beta(Voltage Gated K+ Channel b-subunit);mitochondrion^ ^aldo/keto reductase family protein contains Pfam profile PF00248: oxidoreductase, aldo/keto reductase family^	-1.0608	1	-1.51224	1	1.01586	1	-1.04312	1	1.33885	0.0150094	427.061	372.02	306.82	344.548	304.528	323.975
A	At1g61120	^ ^metabolism^ ^terpene synthase/cyclase family protein similar to S-linalool synthase GI:1491939 from [Clarkia breweri][PMID: 8768373]^	-2.02022	0.00278589	-1.67498	1.65602e-13	-1.50335	1	-1.82115	0.000627884	-1.1211	1	1488.97	651.602	390.321	323.514	229.774	243.435
B	At1g61190	^ ^Pathogen Defense;apoptosis^CNL(CC-NBS-LRR)^disease resistance protein (CC-NBS-LRR class), putative domain signature CC-NBS-LRR exists, suggestive of a disease resistance protein.^	-1.60069	0.000503094	1.88569	1	-2.20772	1	-1.12264	1	1.67887	1	3049.2	2753.74	4563.29	2428.91	3467.61	2543.62
C	At1g61260	^ ^endomembrane system^ ^expressed protein contains similarity to cotton fiber expressed protein 1 [Gossypium hirsutum] gi|3264828|gb|AAC33276^	1.54104	4.66875e-08	-1.08406	1	-1.3672	1	1.03222	1	-1.12071	1	661.619	995.309	996.431	904.01	890.89	754.519
B	At1g61300	^ ^Pathogen Defense;endomembrane system^CNL(CC-NBS-LRR)^disease resistance protein (NBS-LRR class), putative domain signature NBS-LRR exists, suggestive of a disease resistance protein.^	-1.07699	1	1.67872	1	-2.35858	9.66287e-09	-1.04048	1	1.41181	1	615.666	587.917	752.649	392.515	494.48	498.889
A	At1g61810	^ ^glucosidase;Glycoside Hydrolase Family 1;Glycoside Hydrolase Gene Families;endomembrane system^Glycoside Hydrolase Family 1^glycosyl hydrolase family 1 protein contains Pfam PF00232 : Glycosyl hydrolase family 1 domain; TIGRFAM TIGR01233: 6-phospho-beta-galactosidase; similar to beta-glucosidase (GI:3820531) [Pinus contorta]; similar to beta-glucosidase GI:804655 from (Hordeum vulgare)^	-3.43888	3.28984e-08	-1.39926	1	1.47801	1	-1.7839	2.42694e-05	1.19856	1	609.415	212.866	169.277	160.628	110.695	147.321
B	At1g61930	^ ^mitochondrion^ ^expressed protein contains Pfam profile PF04520: Protein of unknown function, DUF584^	-1.25228	0.0300897	-1.15717	1	-1.03048	1	-1.4641	1	-1.08556	1	4170.56	3699.42	3150.37	2715.92	1681.85	1476.5
B	At1g62270	^ ^F-box (FBX)^A1^F-box family protein contains Pfam:PF00646 F-box domain^	1.11897	1	-1.58757	1.42326e-05	-1.09401	1	-1.05468	1	-1.19503	1	672.206	792.152	510.584	347.755	303.182	289.484
A	At1g62300	^ ^AtWRKY6^ TF ^WRKY^ ^WRKY family transcription factor similar to putative DNA-binding protein GI:7268215 from [Arabidopsis thaliana]^	-1.74998	0.000663466	-1.32918	1	1.02597	1	1.03978	1	1.02928	1	446.432	231.966	137.68	159.116	184.571	186.296
E	At1g62540	^ ^endomembrane system^ ^flavin-containing monooxygenase family protein / FMO family protein similar to flavin-containing monooxygenase GB:AAA21178 GI:349534 from Oryctolagus cuniculus [SP|P32417], SP|P97501 from Mus musculus; contains Pfam profile PF00743 Flavin-binding monooxygenase-like^	-1.64506	1	-1.88724	1	1.31739	1	1.59714	0.0608362	1.81127	0.00764607	730.567	460.233	405.315	429.635	595.854	1041.67
C	At1g62690	^ ^mitochondrion^ ^expressed protein ^	3.35134	3.58182e-34	-1.02444	1	-1.82665	4.80042e-07	-1.25482	1	-1.13486	1	844.969	2779.45	2601.37	1815.09	1490.5	1168.91
D	At1g62780	^ ^chloroplast^ ^expressed protein ^	-1.4452	1	-1.67695	1	-1.32645	1	1.67296	0.0059192	2.40723	1	1659.7	1440.46	2234.04	2392.3	2510.03	3112.14
A	At1g62870	^ ^protein modification^ ^expressed protein ^	-1.92321	1.61735e-07	1.1612	1	-1.38358	1	1.07127	1	1.14501	1	913.725	514.829	399.873	267.029	316.568	419.936
A	At1g62975	^ ^BHLH125^ TF ^bHLH^bHLH^basic helix-loop-helix (bHLH) family protein (bHLH125) contains Pfam profile: PF00010 helix-loop-helix DNA-binding domain; supporting cDNA gi|20805889|gb|AF506369.1|^	-4.27952	7.25179e-16	1.1299	1	1.02627	1	1.06441	1	1.37905	1	396.583	100.342	105.459	103.661	115.046	176.936
C	At1g63420	^ ^mitochondrion^ ^expressed protein ^	1.43737	0.0143057	1.35637	1	1.14863	1	1.18431	1	1.18469	1	140.36	181.148	210.411	209.293	228.748	260.433
A	At1g63650	^ENHANCER OF GLABRA3^BHLH002^ TF ^bHLH^bHLH^basic helix-loop-helix (bHLH) family protein similar to bHLH transcription factor (JAF13) GB:AAC39455 [Petunia x hybrida]; contains Pfam profile: PF00010 Helix-loop-helix DNA-binding domain^	-1.4524	1	1.36919	1	-1.1519	1	-1.06132	1	1.70513	0.0193336	4203.87	2912.77	3193.29	3015.83	2509.79	3175.7
B	At1g64060	^CYTOCHROME B245 BETA CHAIN HOMOLOG RBOHAP108^ABA;CytB-H+(Cytochrome b558 (CytB) H+-channel);EF-hand containing proteins:Group VI;Respiratory burst oxidase family^Positive regulator^respiratory burst oxidase protein F (RbohF) (RbohAp108) / NADPH oxidase identical to cytochrome b245 beta chain homolog RbohAp108 [GI:2654868], respiratory burst oxidase protein F [gi:3242456], from Arabidopsis thalia…	2.0913	0.000960425	1.0622	1	-1.30107	1	-1.41134	1	-1.11526	1	1814.42	3582.42	2886.48	2371.26	2235.94	1412.04
D	At1g64200	^ ^ F-ATPase( F-type, V-type and A-type ATPase);Primary Pumps (ATPases) Gene Families;hydrogen-translocating V-type ATPase activity ^V-Type ATPase^vacuolar ATP synthase subunit E, putative / V-ATPase E subunit, putative / vacuolar proton pump E subunit, putative similar to SP|Q39258 Vacuolar ATP synthase subunit E (EC 3.6.3.14) (V-ATPase E subunit) (Vacuolar proton pump E subunit) {Arabidopsis th…	-1.22464	1	-1.30502	1	1.47293	1	1.58834	6.05135e-05	-1.07459	1	305.746	269.675	297.699	429.545	527.369	541.435
C	At1g64625	^ ^ ^ ^expressed protein similar to cDNA bHLH transcription factor (bHLH epsilon gene) GI:32563003^	2.44425	0.0189318	-1.25074	1	1.0313	1	-1.13179	1	1.02911	1	538.815	1079.5	1109.66	1282.67	1068.47	931.54
C	At1g64680	^ ^mitochondrion^ ^expressed protein ^	1.35698	0.015873	-1.05462	1	1.14654	1	1.34797	1	-1.32441	0.01799	1425.65	1887.05	1816.65	1879.41	2261.76	1959.12
E	At1g64970	^VITAMIN E DEFICIENT 4^chloroplast^ ^expressed protein ^	-1.36459	0.0436605	-1.12109	1	1.06121	1	1.24357	1	-1.00958	1	5282.01	4222.72	4015.3	3992.47	4827.99	5666.77
B	At1g65295	^ ^endomembrane system^ ^expressed protein ^	1.06467	1	-1.10324	1	1.05546	1	1.32403	6.34306e-05	-1.02082	1	3117.85	3278.25	3102.06	3089.74	3299.42	3046.76
E	At1g65450	^ ^ ^ ^transferase family protein low similarity to anthranilate N-hydroxycinnamoyl/benzoyltransferase Dianthus caryophyllus GI:3288180, GI:2239091; contains Pfam profile PF02458 transferase family^	-1.34436	1	-1.01658	1	1.29212	1	1.7789	1	3.92758	8.42499e-32	87.6975	81.7388	94.1809	118.797	207.481	1028.26
E	At1g65490	^ ^endomembrane system^ ^expressed protein ^	1.00882	1	1.19965	1	1.25251	1	1.83008	0.00053795	1.57958	1	181.009	156.199	164.317	212.455	335.814	861.145
A	At1g65500	^ ^endomembrane system^ ^expressed protein ^	-1.02719	1	-2.13773	0.000716877	-1.11074	1	1.26724	1	1.35971	1	639.046	676.436	387.229	353.441	342.96	765.774
D	At1g65730	^ ^ ^ ^oligopeptide transporter OPT family protein similar to iron-phytosiderophore transporter protein yellow stripe 1 [Zea mays] GI:10770865; contains Pfam profile PF03169: OPT oligopeptide transporter protein^	1.25842	1	1.58629	0.00286297	1.89285	1	1.52915	9.9495e-05	1.02042	1	138.837	171.513	246.957	472.422	947.552	934.167
B	At1g65980	^PEROXIREDOXIN TPX1^ ^ ^peroxiredoxin type 2, putative strong similarity to type 2 peroxiredoxin [Brassica rapa subsp. pekinensis] GI:4928472; contains Pfam profile: PF00578 AhpC/TSA (alkyl hydroperoxide reductase and thiol-specific antioxidant) family^	-2.51197	0.000618779	-1.80559	1	-1.03504	1	-1.03663	1	-1.25524	1	23162.8	21962.5	23953.3	19704	17082.4	19475.2
A	At1g66140	^ ^ ^ TF ^C2H2 (Zn)^ ^zinc finger (C2H2 type) family protein contains Pfam domain, PF00096: Zinc finger, C2H2 type^	-1.77861	7.04661e-07	-1.5727	0.00173474	-1.18036	1	-1.44892	0.00283036	-1.03715	1	2119.89	1442.16	966.328	675.26	440.984	486.953
A	At1g66180	^ ^endomembrane system^ ^aspartyl protease family protein contains Pfam PF00026: Eukaryotic aspartyl protease profile; similar to CND41, chloroplast nucleoid DNA binding protein (GI:2541876) [Nicotiana tabacum]^	-1.64966	0.00815784	-1.0652	1	-1.10313	1	1.07819	1	1.09558	1	8489.17	6751.98	4888.27	4415.48	5594.78	6243.11
A	At1g66200	^GLN1;2^glutamine biosynthesis;ammonium assimilation;nitrate assimilation pathway;glutamine biosynthesis I^GLUTAMINE SYNTHETASE^glutamine synthetase, putative similar to glutamine synthetase, cytosolic isozyme (Glutamate-- ammonia ligase, GS1) [Lotus japonicus] SWISS-PROT:Q42899^	-1.94369	2.10232e-07	-1.87057	1.03579e-06	-1.02231	1	-1.22307	1	-1.15855	1	18128.8	11262.3	9804.13	9231.82	8652.09	7004.75
E	At1g66390	^PRODUCTION OF ANTHOCYANIN PIGMENT 1^AtMYB90^ TF ^MYB-(R1)R2R3^ ^myb family transcription factor, putative / production of anthocyanin pigment 2 protein (PAP2) contains Pfam profile: PF00249 myb-like DNA-binding domain; similar to GB:AAF66727 from [Petunia x hybrida] (Plant Cell 11 (8), 1433-1444 (1999)); identical to cDNA production of anthocyanin pigment 2 protein (PAP2) GI:11935172^	-3.42591	0.00341549	1.06305	1	1.22004	1	2.58458	6.64357e-11	1.34574	1	189.558	135.778	118.015	583.945	1613.17	1666.23
E	At1g66400	^ ^EF-hand containing proteins:Group IV;calcium ion binding activity^ ^calmodulin-related protein, putative similar to calmodulin-related protein 2, touch-induced from SP:P25070 [Arabidopsis thaliana]; contains Pfam profile: PF00036 EF hand (4 copies)^	-1.42627	1	-1.15487	1	-1.00164	1	2.71673	5.01663e-05	-1.09208	1	354.81	182.384	248.786	227.85	420.765	619.223
A	At1g66760	^ ^MATE(Multi Antimicrobial Extrusion)^ ^MATE efflux family protein contains TIGRfam profile: TIGR00797: MATE efflux family protein, Pfam profile PF01554: Uncharacterized membrane protein family^	-1.3093	1	-1.51927	1	1.43547	6.6585e-05	-1.70076	1	-1.25988	1	7560.38	4549.57	3487.59	4276.46	3014.09	2409.88
E	At1g66940	^ ^endomembrane system^ ^protein kinase-related ^	-2.31519	1.01449e-06	1.01347	1	2.153	0.000824817	2.42455	0.113909	1.75067	1	699.488	338.255	280.58	628.897	1536.65	2303.94
C	At1g67430	^ ^structural constituent of ribosome^ ^60S ribosomal protein L17 (RPL17B) similar to ribosomal protein GI:19101 from [Hordeum vulgare]^	-1.36625	1	-1.01935	1	1.34719	1	1.70208	1	-3.7561	1.8561e-28	14633.7	11837.1	19313.7	18712.3	13642	11489.8
D	At1g67600	^ ^endomembrane system^ ^expressed protein contains Pfam domain, PF02681: Uncharacterized BCR, COG1963^	1.3723	1	2.92455	9.32598e-17	1.09236	1	1.04128	1	-1.23018	1	713.901	1031.6	1951.23	2446.62	3032.45	2865.23
D	At1g67730	^ ^Lipid Metabolism Gene Families;endomembrane system^Putative b-keto acyl reductase family^b-keto acyl reductase, putative (GLOSSY8) similar to b-keto acyl reductase GI:2586127 from [Hordeum vulgare]^	-1.69529	9.42123e-05	-1.04373	1	1.32542	1	-1.14459	1	1.13261	1	9319.25	6875.54	9149.48	11767.8	9911.28	13048.3
A	At1g67770	^ ^chloroplast^ ^RNA-binding protein, putative similar to terminal ear1 gb|AAC39463.1^	-1.93288	1.27998e-29	-1.10515	1	1.06149	1	-1.20406	1	-1.02554	1	1371.31	845.331	855.338	693.685	520.308	548.813
A	At1g67860	^ ^ ^ ^expressed protein ^	-2.67651	4.94135e-26	-1.36694	1	-1.20629	1	-1.25251	1	-1.8502	1	3268.59	1617.78	1793.78	1425.15	1086.25	812.301
A	At1g67865	^ ^ ^ ^expressed protein ^	-2.16603	1.9215e-08	-1.7669	0.26297	1.41707	1	-1.18404	1	-1.31797	1	1772.76	851.125	650.097	528.308	438.004	500.908
A	At1g67870	^ ^mitochondrion^ ^glycine-rich protein contains non-consensus GG donor splice site at exon2; modeled to est match.^	-1.52722	1	-1.18194	1	-1.24958	1	-1.30052	1	-1.52626	1.40654e-06	636.025	456.941	496.458	478.397	361.902	279.337
C	At1g67900	^ ^signal transducer activity^ ^phototropic-responsive NPH3 family protein contains NPH3 family domain, Pfam:PF03000^	1.16078	1	1.03161	1	1.3148	1	1.1264	1	-1.44075	0.0186476	3814.25	4458.95	4889.94	5597.88	5215.41	4472.81
C	At1g67920	^ ^ ^ ^expressed protein ^	1.11148	1	1.6938	1.69455e-05	1.32292	1	-1.24727	1	-1.16968	1	407.128	449.857	623.51	651.458	556.841	418.006
B	At1g68130	^ ^ ^ TF ^C2H2 (Zn)^ ^zinc finger (C2H2 type) family protein contains Pfam domain, PF00096: Zinc finger, C2H2 type^	-1.11944	1	-1.16669	1	-1.26533	1	-1.51878	2.43534e-10	-1.28038	1	870.914	824.587	860.252	644.62	416.303	351.004
A	At1g68170	^ ^Nodulin-like protein family;endomembrane system^ ^nodulin MtN21 family protein similar to MtN21 GI:2598575 (root nodule development) from [Medicago truncatula]^	-1.79818	1.7819e-06	-1.74504	1	1.49272	1	-1.12996	1	-1.87801	1	1924.21	1012.17	732.953	703.884	575.412	348.213
B	At1g68320	^ ^AtMYB62^ TF ^MYB-(R1)R2R3^ ^myb family transcription factor (MYB62) similar to myb-related transcription factor (cpm7) GI:1002799 from [Craterostigma plantagineum]; contains PFAM profile: myb DNA binding domain PF00249^	2.18437	8.52177e-27	-1.96268	1.06581e-13	-1.73106	1	-1.63281	6.60498e-08	-1.59738	0.240197	589.905	1353.94	760.35	444.919	267.318	198.815
D	At1g68480	^JAGGED^ ^ TF ^C2H2 (Zn)^ ^zinc finger (C2H2 type) family protein contains Pfam profile: PF00096 zinc finger, C2H2 type^	2.33967	3.35626e-13	1.75432	0.0035249	1.24351	1	1.2142	1	-1.11417	1	181.695	478.843	1144.57	1593.5	1590.26	1287.49
A	At1g68530	^ECERIFERUM 6^Acyl Lipid Metabolism;Strong similarity to beta-keto-Coa synthase family;wax biosynthesis;very-long-chain fatty acid metabolism;epicuticular wax biosynthesis^Ketoacyl-CoA Synthase^very-long-chain fatty acid condensing enzyme (CUT1) identical to very-long-chain fatty acid condensing enzyme (CUT1) GB:AF129511 (required for cuticular wax biosynthesis and pollen fertility: Millar,A.A., …	-1.80992	1.08474e-14	-1.03572	1	1.34908	1	-1.1892	1	1.59362	2.7399e-05	14482.4	7278.81	8609.35	10317.1	8593.11	14190.6
A	At1g68570	^ ^POT(Proton-dependent Oligopeptide Transporter);Organic Solute Cotransporters;transporter activity^Similar to LeOPT1 family^proton-dependent oligopeptide transport (POT) family protein contains Pfam profile: PF00854 POT family^	-3.09653	0	1.07785	1	1.70073	0.00167283	1.39772	1	1.13961	1	4212.72	1724.21	1380.36	1850.94	2199.04	2106.53
B	At1g68640	^PERIANTHIA^AtbZIP46^ TF ^bZIP^ ^bZIP family transcription factor (PERIANTHIA) identical to transcription factor PERIANTHIA GB:AAD19660 GI:4378757 from [Arabidopsis thaliana]^	1.32553	1	1.07006	1	-1.27222	1	-2.42029	2.58713e-08	-1.14964	1	5658.17	6603.56	8361.11	7438.8	4275.46	4227.93
E	At1g68710	^ ^bZIP transcription factor family;Acyl Lipid Metabolism;P-ATPase;Primary Pumps (ATPases) Gene Families;P-type ATPase activity^Translocase;Putative P-type ATPase family^haloacid dehalogenase-like hydrolase family protein similar to Potential phospholipid-transporting ATPase (EC 3.6.3.1) from {Mus musculus} SP|P98200, {Bos taurus} SP|Q29449, {Homo sapiens} SP|O43520; contains InterPro accession I…	1.35309	0.25998	1.06558	1	1.11301	1	1.48942	3.00749e-07	1.15356	1	1568.52	2036.52	1935.21	2266.21	3327.3	4043.82
A	At1g68740	^ ^receptor activity^ ^EXS family protein / ERD1/XPR1/SYG1 family protein similar to PHO1 protein [Arabidopsis thaliana] GI:20069032; contains Pfam profiles PF03105: SPX domain, PF03124: EXS family^	-2.37027	1	-1.87461	1.03383e-07	1.46861	1	1.17835	1	1.03941	1	1496.37	689.632	501.996	501.276	712.278	607.135
B	At1g69040	^ACT REPEAT 4^enzyme activity^ ^ACT domain containing protein (ACR4) low similarity to uridylyltransferase [Gluconacetobacter diazotrophicus] GI:17226253; contains Pfam profile PF01842: ACT domain^	1.0018	1	-1.39856	1	-1.27346	1	1.21183	1	-1.37251	8.05313e-05	17359.3	18684.5	15121.4	14676.5	15001.7	12472.3
E	At1g69180	^CRABS CLAW^ ^ TF ^YABBY^ ^transcription factor CRC (CRABS CLAW) identical to transcription factor CRC (CRABS CLAW) GI:4836698 [Arabidopsis thaliana]^	1.14396	1	1.04207	1	1.86986	3.17563e-08	2.87956	2.8863e-22	1.65466	0.00248286	910.055	900.072	1031.06	1834.44	3682.04	6993.17
A	At1g69520	^ ^methyltransferase activity^ ^methyltransferase-related weak similarity to SP|Q05197 Phosphatidylethanolamine N-methyltransferase (EC 2.1.1.17) {Rhodobacter sphaeroides}; contains domain similarity with PF01209: methyltransferase, UbiE/COQ5 family^	-2.05137	1.15013e-09	-1.08531	1	1.38747	1	1.32198	0.00312098	-1.1643	1	1742.78	1035.05	872.859	1167.41	1289.63	1137.29
B	At1g69523	^ ^chloroplast^ ^UbiE/COQ5 methyltransferase family protein low similarity to SP|Q05197 Phosphatidylethanolamine N-methyltransferase (EC 2.1.1.17) [Rhodopseudomonas sphaeroides] {Rhodobacter sphaeroides}; contains Pfam profile PF01209: methlytransferase, UbiE/COQ5 family^	1.08717	1	1.17335	1	1.09629	1	1.29318	0.0284742	1.22105	1	845.932	910.85	824.632	660.531	830.046	997.071
E	At1g69530	^ARABIDOPSIS THALIANA EXPANSIN A1^ Assembly, Architecture, and Growth;Protein synthesis factors in ArabidopsisExpansins;molecular_function unknown ^Growth modifying proteins;Alpha-Expansin Gene Family^expansin, putative (EXP1) identical to expansin (At-EXP1) [Arabidopsis thaliana] GI:1041702; alpha-expansin gene family, PMID:11641069^	-1.44049	0.00147565	1.33228	1	1.66698	4.79484e-05	1.99986	0.52438	1.16648	1	1342.19	1070.77	1578.93	2104.31	4314.41	5393.25
B	At1g69560	^ ^AtMYB105^ TF ^MYB-(R1)R2R3^ ^myb family transcription factor (MYB105) contains Pfam profile: PF00249: Myb-like DNA-binding domain^	2.16491	3.52585e-26	-1.51327	1	-1.62518	0.7932	1.08984	1	1.3479	1	418.366	944.433	628.331	334.586	364.387	505.543
B	At1g69600	^ ^ ^ TF ^ZF-HB (Zn)^ ^zinc finger homeobox family protein / ZF-HD homeobox family protein ^	1.06754	1	1.05741	1	-1.21097	1	-1.54853	3.37985e-07	-1.03199	1	3621.27	3959.39	3946.09	4003.12	2286.75	1929.64
A	At1g69620	^RIBOSOMAL PROTEIN L34^structural constituent of ribosome^ ^60S ribosomal protein L34 (RPL34B) similar to SP:Q42351 from [Arabidopsis thaliana]^	-1.2123	1	-1.0497	1	-1.00588	1	-1.29099	1	1.39974	7.60188e-05	17322.9	13590.9	15712.3	15359.6	13374.5	14683.4
A	At1g69850	^NITRATE TRANSPORTER^POT(Proton-dependent Oligopeptide Transporter);Organic Solute Cotransporters;transporter activity^Similar to LeOPT1 family^nitrate transporter (NTL1) identical to nitrate transporter (NTL1) GI:3377517 [Arabidopsis thaliana]^	-1.4897	1	-1.20251	1	-1.00134	1	-1.7999	6.05818e-12	1.16678	1	856.575	547.903	457.954	357.903	228.174	256.536
A	At1g69870	^ ^POT(Proton-dependent Oligopeptide Transporter);Organic Solute Cotransporters;transporter activity^Similar to LeOPT1 family^proton-dependent oligopeptide transport (POT) family protein contains Pfam profile: PF00854 POT family^	-1.44399	0.000137155	1.19252	1	1.27725	1	-1.03918	1	-1.03288	1	3862.5	2748.46	3110.15	3272.17	3383.31	3816.97
D	At1g70000	^ ^ ^ TF ^MYB-related^ ^DNA-binding family protein contains Pfam domains, PF00249: Myb-like DNA-binding domain and PF00098: Zinc knuckle^	-1.62065	1	1.11663	1	1.57608	9.63653e-09	1.16528	1	1.21232	1	536.545	443.727	621.25	889.368	991.907	1177.09
A	At1g70170	^MATRIX METALLOPROTEINASE^GPI-anchored protein;endomembrane system^Metallo-Proteases^matrixin family protein similar to SP|P29136 Metalloendoproteinase 1 precursor (EC 3.4.24.-) (SMEP1) {Glycine max}; contains InterPro accession IPR001818: Matrixin^	-2.03173	0.00202201	-1.50939	1	1.09894	1	-1.15833	1	1.10647	1	190.418	95.4718	89.0204	105.691	79.9167	90.0804
B	At1g70310	^SPERMIDINE SYNTHASE 2^arginine catabolism to spermine;arginine spermine degradation;ornithine spermine biosynthesis;polyamine biosynthesis III^SPERMIDINE SYNTHASE^spermidine synthase 2 (SPDSYN2) / putrescine aminopropyltransferase 2 identical to SP|O48661 Spermidine synthase 2 (EC 2.5.1.16) (Putrescine aminopropyltransferase 2) (SPDSY 2) {Arabidopsis thaliana}^	-1.12907	1	1.02066	1	-1.34745	0.000298166	-1.12439	1	-1.32407	1	14715.3	13544.3	13081	10601	9895.99	8534.19
E	At1g70320	^UBIQUITIN-PROTEIN LIGASE 2^ ^ ^ubiquitin-protein ligase 2 (UPL2) nearly identical to ubiquitin-protein ligase 2 [Arabidopsis thaliana] GI:7108523; E3, HECT-domain protein family; similar to ubiquitin-protein ligase 2 GI:7108523 from [Arabidopsis thaliana]^	-1.02147	1	1.29127	1	-1.4683	1	-1.3271	1	2.01712	5.28106e-08	14690.6	13015.1	12527.7	10849.3	12236.9	15995.6
B	At1g70510	^ ^ATK1/KNAT2^ TF ^HB^HD-KNOX^homeobox protein knotted-1 like 2 (KNAT2) (K1) identical to homeobox protein knotted-1 like 2 ( KNAT2/ ATK1) SP: from [Arabidopsis thaliana]^	1.01395	1	1.12561	1	-1.09992	1	-1.40812	0.0163863	-1.06401	1	3000.22	3015.33	2734.28	2363.06	1736.53	1476.04
E	At1g70560	^ ^ ^ ^alliinase C-terminal domain-containing protein contains Pfam profiles: PF04864 allinase C-terminal domain, PF04863 alliinase EGF-like domain^	-1.84733	4.11199e-08	1.11856	1	1.79313	0.000540264	1.30755	1	-1.0658	1	4622.25	3103	2807.28	4421.06	5892.59	5687.2
C	At1g70710	^ ^Glycoside Hydrolase Family 9;Hydrolases;Glycoside Hydrolase Gene Families;endomembrane system^Endo-acting glucanases;Glycoside Hydrolase Family 9^endo-1,4-beta-glucanase (EGASE) / cellulase identical to endo-1,4-beta-glucanase GB:CAA67157 GI:2440035 from [Arabidopsis thaliana]^	1.11683	1	1.80345	0.000605386	1.20113	1	1.04679	1	1.02874	1	12094	13896.3	16578.7	13048.3	13775.5	15155.6
D	At1g70720	^ ^endomembrane system^ ^invertase/pectin methylesterase inhibitor family protein low similarity to pectinesterase from Lycopersicon esculentum SP|Q43143, Arabidopsis thaliana SP|Q42534, Phaseolus vulgaris SP|Q43111; contains Pfam profile PF04043: Plant invertase/pectin methylesterase inhibitor^	1.43706	1	1.64826	1	2.27057	1	3.27353	6.63137e-08	-1.1868	1	38.4312	55.4719	81.1646	178.918	383.032	344.808
C	At1g70790	^ ^C2H2 zinc finger family^ ^C2 domain-containing protein similar to zinc finger and C2 domain protein GI:9957238 from [Arabidopsis thaliana]^	1.33621	0.000153192	-1.14934	1	-1.06322	1	-1.06353	1	-1.22211	1	3260.81	4257.65	4233.66	4106.49	3767.28	3389.21
A	At1g70895	^CLAVATA3/ESR-RELATED 17^protein binding activity^ ^CLE17, putative CLAVATA3/ESR-Related 17 (CLE17)^	-1.13907	1	-1.2976	1	1.05789	1	-1.05117	1	-1.64495	0.0105764	4304.72	3580	2444.23	2853	2292.2	1552.52
E	At1g70940	^PIN-FORMED 3^auxin;AEC(Auxin Efflux Carrier);Organic Solute Cotransporters;plasma membrane^auxin efflux carrier;Similarity to auxin transport protein family^auxin transport protein, putative (PIN3) similar to auxin transport protein [Arabidopsis thaliana] gi|5817301|gb|AAD52695^	-1.63017	0.0026284	1.13089	1	1.21246	1	1.85826	6.37824e-06	1.30251	1	498.029	336.309	421.024	503.405	1018.35	1448.73
A	At1g70985	^ ^GPI-anchored protein;endomembrane system^Unknown/hypothetical^hydroxyproline-rich glycoprotein family protein contains proline-rich extensin domains, INTERPRO:IPR002965^	-1.63572	1.55376e-09	-1.06482	1	1.20787	1	-1.21438	1	1.0561	1	644.822	424.168	370.356	391.275	315.581	300.883
E	At1g71050	^ ^heavy metal ion transport^ ^heavy-metal-associated domain-containing protein / copper chaperone (CCH)-related low similarity to copper homeostasis factor [GI:3168840][PMID:9701579]; similar to farnesylated protein ATFP7 [GI:4097555]; contains heavy-metal-associated domain PF00403^	-1.55573	1	-1.08817	1	1.17105	1	1.46339	1	2.10549	8.43278e-09	335.504	164.658	127.4	250.353	367.899	782.664
C	At1g71230	^AJH2^ ^ ^COP9 signalosome subunit 5A / CSN subunit 5A (CSN5A) / c-JUN coactivator protein AJH2, putative (AJH2) COP9 complex subunit CSN5-2; identical to c-Jun coactivator protein AJH2 GI:3641312 from [Arabidopsis thaliana]; identical to cDNA CSN complex subunit 5A (CSN5A) GI:18056660; contains Pfam profile PF01398: Mov34/MPN/PAD-1 family^	1.32323	1	1.07937	1	1.31816	1	1.03819	1	-1.75913	2.36134e-11	2115.55	2778.66	2909.53	3426.92	3230.45	2138.57
D	At1g71695	^ ^Class III peroxidase;endomembrane system^ ^peroxidase 12 (PER12) (P12) (PRXR6) identical to SP|Q96520 Peroxidase 12 precursor (EC 1.11.1.7) (Atperox P12) (PRXR6) (ATP4a) {Arabidopsis thaliana}^	-1.26936	1	1.00518	1	1.53269	0.012219	1.06271	1	-1.04803	1	8341.57	6289.42	7270.93	9920.21	9586.1	10203.2
B	At1g71696	^SOL1 SPLICE VARIANT A1B1^endomembrane system^ ^carboxypeptidase D, putative similar to carboxypeptidase D [Anas platyrhynchos] gi|2789654|gb|AAB96915^	1.07649	1	-1.1462	1	1.03154	1	1.00243	1	-1.23494	0.0064577	2749.4	2811.44	2667.95	2829.24	2791.53	2417.63
C	At1g71870	^ ^MATE(Multi Antimicrobial Extrusion)^ ^MATE efflux family protein contains Pfam profile PF01554: Uncharacterized membrane protein family^	2.22416	0.0220681	1.39122	1	-1.2937	1	-1.21126	1	-1.0127	1	512.274	1285.68	1476.16	1170.79	999.879	803.118
B	At1g71880	^SUCROSE-H+ SYMPORTER^SUGAR TRANSPORTERS;GPH-S(Glycoside-Pentoside-Hexuronide (GPH) Symporter);Organic Solute Cotransporters;sucrose:hydrogen symporter activity^DISACCHARIDE-H+ (SUCROSE) SYMPORTERS;Sucrose-proton symporter family^sucrose transporter / sucrose-proton symporter (SUC1) identical to sucrose-proton symporter SUC1 [Arabidopsis thaliana] GI:407094^	-1.32322	0.0499102	1.25524	1	-1.34608	1	-1.21374	1	-1.047	1	12746.8	9733.95	12320.3	8293	5853.47	5879.88
B	At1g71970	^ ^chloroplast^ ^expressed protein ^	1.0535	1	1.20491	1	-1.74754	0.0245267	-1.06322	1	2.04897	1	427.996	492.185	573.382	261.014	303.344	278.953
C	At1g72100	^ ^endomembrane system^ ^late embryogenesis abundant domain-containing protein / LEA domain-containing protein low similarity to embryogenic gene [Betula pendula] GI:4539485; contains Pfam profile PF02987: Late embryogenesis abundant protein^	1.78962	0.00543334	1.17964	1	-1.04938	1	-1.13648	1	1.19564	1	286.111	522.713	727.329	802.096	673.778	695.822
D	At1g72430	^ ^chloroplast^ ^auxin-responsive protein-related similar to auxin-induced protein TGSAUR22 (GI:10185820) [Tulipa gesneriana]^	1.03375	1	1.14898	1	2.47029	1.28547e-16	2.10072	1.32066e-27	-1.10547	1	438.955	428.155	515.106	1247.35	2234.49	2411.48
E	At1g72610	^GERMIN-LIKE PROTEIN 1^Germin-like protein family^ ^germin-like protein (GER1) identical to germin-like protein subfamily 3 member 1 SP|P94040; contains Pfam profile: PF01072 Germin family^	-3.19283	1.56119e-21	2.09425	1	4.36891	3.26216e-25	1.74561	1	1.64372	1	3252.91	1506.46	1736.83	6341.39	12046.1	20254.3
A	At1g72660	^ ^ATP binding activity^ ^developmentally regulated GTP-binding protein, putative very strong similarity to developmentally regulated GTP binding protein (DRG1) [Arabidopsis thaliana] GI:2345150^	-1.22494	1	1.16966	1	-1.20889	1	1.27743	1	2.25771	0.00317844	1783.5	1265.32	1263.54	1023.82	879.648	1044.24
A	At1g72930	^TOLL/INTERLEUKIN-1 RECEPTOR-LIKE^Pathogen Defense;membrane^TN(TIR-NBS)^Toll-Interleukin-Resistance (TIR) domain-containing protein domain signature TIR exists, suggestive of a disease resistance protein.^	-1.01651	1	-1.70096	0.0414527	1.24981	1	-1.10322	1	1.2163	1	2141.96	2134.58	962.933	946.818	932.965	1183.58
D	At1g73010	^ ^ ^ ^expressed protein similar to phosphatase, orphan 1 (GI:20196841) [Mus musculus], (GI:20196839) [Homo sapiens]; contains TIGRFAM TIGR01489: 2,3-diketo-5-methylthio-1-phosphopentane phosphatase profile; contains TIGRFAM TIGR01488: HAD-superfamily hydrolase, subfamily IB (PSPase-like)^	1.1485	1	7.90244	7.5404e-22	1.329	1	1.01104	1	-1.23249	1	765	1255.2	5843.45	10171.2	8448.34	7213.21
E	At1g73050	^ ^endomembrane system^ ^(R)-mandelonitrile lyase, putative / (R)-oxynitrilase, putative similar to mandelonitrile lyase from Prunus serotina [SP|P52706, SP|52707]; contains Pfam protile PF00732 GMC oxidoreductase^	-1.91342	1	1.94251	0.0199645	1.55399	1	1.18424	1	1.15957	1	15265.9	9532.9	13157.8	15737.9	16835.2	17939.8
D	At1g73190	^ ^MIP(The Major Intrinsic Protein);Aquaporin Families;MIP family;water channel activity^Delta tonoplast integral protein family^tonoplast intrinsic protein, alpha / alpha-TIP (TIP3.1) identical to SP|P26587 Tonoplast intrinsic protein, alpha (Alpha TIP) [Arabidopsis thaliana] (Plant Physiol. 99, 561-570 (1992))^	3.67573	0.0106703	1.14587	1	-1.04853	1	1.03049	1	-1.2245	1	48.6459	126.731	267.65	277.201	269.323	264.794
A	At1g73370	^ ^Glycosyltransferase Family 4;sucrose biosynthesis^SUCROSE SYNTHASE^sucrose synthase, putative / sucrose-UDP glucosyltransferase, putative similar to sucrose synthase GI:6682841 from [Citrus unshiu]^	-1.47648	0.0033368	-1.12588	1	1.04502	1	-1.26573	1	-1.23096	1	787.81	608.427	640.409	588.498	477.228	428.541
A	At1g73550	^ ^Acyl Lipid Metabolism;endomembrane system^Lipid Transfer Protein type 5^protease inhibitor/seed storage/lipid transfer protein (LTP) family protein contains Pfam protease inhibitor/seed storage/LTP family domain PF00234^	-2.40154	0.00585264	-1.2137	1	1.09493	1	-1.25659	1	-1.04179	1	299.269	140.19	116.985	120.838	107.201	101.049
C	At1g73590	^PIN-FORMED 1^auxin;AEC(Auxin Efflux Carrier);Organic Solute Cotransporters;transporter activity^auxin efflux carrier;Similarity to auxin transport protein family^auxin efflux carrier protein, putative (PIN1) identical to putative auxin efflux carrier protein; AtPIN1 [Arabidopsis thaliana] GI:4151319; contains Pfam profile PF03547: Auxin Efflux Carrier^	1.45843	1	-1.18265	1	-1.10886	1	-1.18776	1	-1.31632	0.0474462	8628.58	11364.2	12126.1	12274.2	10605.2	8953.3
B	At1g73670	^ ^Mitogen Activated Protein Kinase (MAPK) ;MAP Kinase;mitochondrion^ ^mitogen-activated protein kinase, putative / MAPK, putative (MPK15) similar to mitogen-activated protein kinase GB:A56042 [Dictyostelium discoideum]; mitogen-activated protein kinase (MAPK)(AtMPK15), PMID:12119167; contains Pfam profile: PF00069 Eukaryotic protein kinase domain^	1.1274	1	1.03349	1	-1.09311	1	1.23846	1	-1.36242	0.0138234	4090.66	4793.76	4260.61	3555.38	4225.6	3457.12
D	At1g74040	^2-isopropylmalate synthase 1^cellular_component unknown;leucine biosynthesis^2-ISOPROPYLMALATE SYNTHASE^2-isopropylmalate synthase 1 (IMS1) identical to 2-isopropylmalate synthase (IMS1) [Arabidopsis thaliana] GI:12330687; identical to cDNA 2-isopropylmalate synthase (IMS1) GI:12330686^	1.41045	0.0240819	-1.00082	1	1.12336	1	1.15093	1	-1.27433	1	3809.42	4861.06	5179.19	6474.47	6848.82	6822.05
E	At1g74200	^ ^ ^ ^leucine-rich repeat family protein contains leucine rich-repeat (LRR) domains Pfam:PF00560, INTERPRO:IPR001611; contains similarity to disease resistance protein [Lycopersicon esculentum] gi|3894383|gb|AAC78591 disease resistance protein [Lycopersicon esculentum] gi|3894383|gb|AAC78591^	1.07186	1	1.46881	1	1.06054	1	-1.02414	1	1.53967	0.013586	231.017	216.519	244.252	260.605	273.173	332.534
C	At1g74430	^ ^AtMYB95^ TF ^MYB-(R1)R2R3^ ^myb family transcription factor (MYB95) contains Pfam profile: PF00249 myb-like DNA-binding domain^	1.6157	7.19467e-06	1.14854	1	1.09353	1	1.03191	1	-1.42293	1	3474.17	5681.22	7761.41	7511	7156.2	4882.07
E	At1g74670	^ ^GA^ ^gibberellin-responsive protein, putative similar to SP|P46690 Gibberellin-regulated protein 4 precursor {Arabidopsis thaliana} GASA4; contains Pfam profile PF02704: Gibberellin regulated protein^	-1.51204	1	-2.07955	6.23205e-36	1.58723	1	1.37641	1	2.82933	0.000353128	2307.9	1615.85	919.873	1003.77	1625.87	3299.8
C	At1g75140	^ ^endomembrane system^ ^expressed protein ^	1.31825	0.0129992	1.14978	1	1.00346	1	1.03759	1	-1.23249	1	3014.08	3478.18	3764.78	3759.2	4039.44	3533.63
C	At1g75240	^ ^ ^ TF ^ZF-HB (Zn)^ ^zinc finger homeobox family protein / ZF-HD homeobox family protein ^	1.01808	1	1.93086	2.45668e-09	-1.00682	1	-1.23765	1	1.03213	1	8563.07	8458.44	10794.1	9082.96	7717.66	8752.92
C	At1g75430	^ ^ ^ TF ^HB^HD-BELL^homeodomain-containing protein contains 'Homeobox' domain signature, Prosite:PS00027^	1.77787	1	3.16375	1.68801e-13	1.19699	1	-1.28024	1	1.22975	1	252.659	514.088	1077.41	1171.76	928.836	959.704
C	At1g75440	^ ^chloroplast^ ^ubiquitin-conjugating enzyme 16 (UBC16) E2; identical to gi:2801444, GB:AAC39325 from [Arabidopsis thaliana] (Plant Mol. Biol. 23 (2), 387-396 (1993))^	1.75634	2.99484e-07	1.24375	1	1.1619	1	1.07126	1	-1.0946	1	1070.81	1707.84	2252.28	2545.36	2218.93	1624.73
B	At1g75520	^ ^SRS5^ TF ^SRS (Zn)^ ^lateral root primordium (LRP) protein-related similar to lateral root primordium 1 (LRP1) [Arabidopsis thaliana] GI:882341; contains Pfam profile PF05142: Domain of unknown function (DUF702)^	1.18181	1	-1.11636	1	-1.28553	1	-1.66657	1.42842e-06	-1.3117	1	4148.95	4535.75	2616.6	2625.66	1578.02	1281.05
A	At1g75540	^ ^ ^ TF ^CO-like (Zn)^ ^zinc finger (B-box type) family protein similar to zinc finger protein GB:BAA33202 GI:3618312 from [Oryza sativa]^	-1.41554	0.77709	-1.16552	1	1.07781	1	-1.69917	0.0255262	1.2189	1	2809.21	1957.55	1634.49	1846.13	1191.51	1494.2
A	At1g75900	^ ^ ^ ^family II extracellular lipase 3 (EXL3) EXL3 (PMID:11431566); similar to anter-specific proline-rich protein (APG) SP:P40602 [Arabidopsis thaliana]^	-3.76275	6.12605e-13	-1.08077	1	1.85724	1.16994e-05	2.2433	0.52438	2.15013	2.70114e-28	6604.85	1634.71	1216.84	1349.85	2285.74	5229
D	At1g76090	^SMT3^BR biosynthesis;endomembrane system^sterol biosynthesis^S-adenosyl-methionine-sterol-C-methyltransferase identical to S-adenosyl-methionine-sterol-C-methyltransferase GI:2246456 from [Arabidopsis thaliana]^	1.61398	0.000295142	1.75265	0.00513925	1.95337	2.48285e-17	2.22363	2.92776e-07	1.25227	1	400.032	758.157	1180.47	2208.64	4201.58	4366.85
E	At1g76100	^ ^ ^ ^plastocyanin identical to plastocyanin GI:1865683 from [Arabidopsis thaliana]^	-1.2315	1	1.00632	1	1.36066	0.250425	1.48599	1	1.91557	4.02007e-06	1842.24	1479.96	1908.44	2859.29	3311.23	5065.34
A	At1g76110	^ ^ ^ TF ^ARID^ARID-HMG^high mobility group (HMG1/2) family protein / ARID/BRIGHT DNA-binding domain-containing protein low similarity to high mobility group protein [Plasmodium falciparum] GI:790198; contains Pfam profiles PF00505: HMG (high mobility group) box, PF01388: ARID/BRIGHT DNA binding domain^	-2.17716	2.75964e-08	-1.01818	1	1.45806	1	-1.27576	1	-1.28112	1	10897.5	6030.67	6661.21	10037.4	8890.36	7576.84
B	At1g76420	^CUP-SHAPED COTYLEDON3^ANAC031^ TF ^NAC^ ^no apical meristem (NAM) family protein N-term similar to N-term of NAM GB:CAA63101 [Petunia x hybrida] (apical meristem formation), CUC2 GB:BAA19529 [Arabidopsis thaliana], GRAB2 protein GB:CAA09372 [Triticum sp.]^	-1.11355	1	-1.09953	1	-1.24915	1	-1.53524	1	-1.64317	3.11197e-05	9129.25	7375.03	6948.28	7601.19	4886.22	2736.16
A	At1g76590	^ ^ ^ TF ^PLATZ (Zn)^ ^zinc-binding family protein similar to zinc-binding protein [Pisum sativum] GI:16117799; contains Pfam profile PF04640 : Protein of unknown function, DUF597^	-1.26038	1	-1.71632	0.00759861	1.25741	1	-1.32567	1	1.20027	1	147.967	137.294	100.16	133.503	89.4192	106.133
E	At1g76620	^ ^chloroplast^ ^expressed protein contains Pfam profile PF04784: Protein of unknown function, DUF547^	-1.07493	1	1.07406	1	1.57069	0.100439	1.74057	8.03441e-07	1.14122	1	625.774	594.794	568.535	665.487	1036.65	1363.97
B	At1g76660	^ ^ ^ ^expressed protein ^	-1.20743	1	1.18092	1	1.01936	1	-1.31909	0.000567036	1.09834	1	3900.42	3156.04	3495.84	3477.38	2501.95	2527.92
D	At1g76790	^ ^ ^ ^O-methyltransferase family 2 protein similar to caffeic acid O-methyltransferase [Catharanthus roseus][GI:18025321], catechol O-methyltransferase GB:CAA55358 [Vanilla planifolia]^	1.28029	1	2.88176	1.10839e-07	1.50886	1	1.24661	1	-1.24992	1	1007.46	1262.92	2728.54	3115.61	4664.98	3426.31
E	At1g76880	^ ^DF1L^ TF ^Trihelix^ ^trihelix DNA-binding protein, putative similar to DNA-binding protein DF1 [Pisum sativum] GI:13646986^	1.21233	1	1.10084	1	1.08306	1	1.43402	0.00247382	1.03812	1	1004.86	1160.42	1157.33	1305.14	1803.39	1925.2
D	At1g77110	^PIN-FORMED 6^AEC(Auxin Efflux Carrier);Organic Solute Cotransporters;transporter activity^Similarity to auxin transport protein family^auxin transport protein, putative similar to auxin transport protein EIR1 GI:3377507 from [Arabidopsis thaliana]^	1.26436	1	1.57846	0.0380304	1.40887	1	1.25727	1	1.119	1	401.048	570.873	811.742	1291.34	1514.1	1309.09
A	At1g77380	^ ^AAAP(Amino Acid/Auxin Permease);Organic Solute Cotransporters;AAAP family;amino acid permease activity^Amino acid permease family^amino acid carrier, putative / amino acid permease, putative strong similarity to amino acid carrier GI:3293031 from [Ricinus communis]; contains Pfam profile PF01490: Transmembrane amino acid transporter protein; identical to cDNA AAP3 (Amino Acid Permease) GI:3970…	-1.49865	1	-1.476	1	-1.23441	1	-1.96571	1.46553e-08	-1.51261	1	2268.7	1740.37	1017.46	761.995	442.978	298.6
A	At1g77660	^ ^chloroplast^ ^MORN (Membrane Occupation and Recognition Nexus) repeat-containing protein /phosphatidylinositol-4-phosphate 5-kinase-related low similarity to phosphatidylinositol-4-phosphate 5-kinase AtPIP5K1 [Arabidopsis thaliana] GI:3702691; contains Pfam profile PF02493: MORN repeat^	-2.14006	5.31489e-25	-1.31895	1	1.27806	1	-1.10581	1	-1.06677	1	5954.06	2993.68	2153.7	2302.09	1906.03	1989.02
B	At1g77855	^ ^ ^ ^hypothetical protein ^	1.31405	0.0324384	-1.06449	1	-1.05381	1	1.00709	1	1.04283	1	716.567	984.716	899.894	781.066	826.541	869.968
E	At1g77870	^ ^ubiquitin^ ^expressed protein similar to geranylgeranylated protein ATGP4 [GI:4097567]^	1.13911	1	-1.38649	0.0049805	1.49578	1	1.95656	2.82564e-09	-1.07075	1	491.411	577.093	446.698	674.322	1159.47	1447.96
A	At1g78370	^ ^mitochondrion^ ^glutathione S-transferase, putative similar to 2,4-D inducible glutathione S-transferase GI:2920666 from [Glycine max]^	-2.86324	0.000129272	1.0288	1	1.54744	1	1.01833	1	1.19769	1	8180.82	2906.66	3123.59	5318.44	5542.28	6729.45
C	At1g78440	^ ^GA^putative gibberellin 2-oxidase^gibberellin 2-oxidase / GA2-oxidase (GA2OX1) identical to gibberellin 2- oxidase ga2ox1 [GI:4678366] from [Arabidopsis thaliana]^	5.58533	0	-1.42439	1	1.07041	1	-1.01743	1	-1.30624	1	108.063	545.966	403.824	434.439	385.905	344.672
C	At1g78570	^ ^Nucleotide-sugar interconversion pathways^RHM & UER^NAD-dependent epimerase/dehydratase family protein similar to dTDP-glucose 4,6-dehydratase from Aneurinibacillus thermoaerophilus GI:16357461, RmlB from Leptospira borgpetersenii GI:4234803; contains Pfam profile PF01370 NAD dependent epimerase/dehydratase family^	-1.21763	1	2.14045	7.33288e-09	1.15495	1	-1.34343	1	-1.02589	1	14962.7	12179.7	19059	19006.1	15764.6	15073.2
C	At1g78860	^ ^endomembrane system^ ^curculin-like (mannose-binding) lectin family protein low similarity to Ser/Thr protein kinase [Zea mays] GI:2598067; contains Pfam profile PF01453: Lectin (probable mannose binding)^	2.44913	9.36778e-12	1.24387	1	-1.39456	1	-1.044	1	-1.08438	1	1308.91	2527.82	2845.41	2243.45	2289.59	1997.93
A	At1g78970	^ ^BR biosynthesis^sterol biosynthesis^lupeol synthase (LUP1) / 2,3-oxidosqualene-triterpenoid cyclase identical to lupeol synthase GI:1762150 from [Arabidopsis thaliana], 2,3-oxidosqualene-triterpenoid cyclase [Arabidopsis thaliana] GI:2738027; contains Pfam profile PF00432: Prenyltransferase and squalene oxidase repeat; contains TIGRfam profile TIGR01787: squalene/oxidosqualene cyclases; identi…	-1.32474	0.000758102	-1.1411	1	-1.0416	1	1.0456	1	1.09259	1	913.509	709.247	652.439	655.166	588.648	604.168
C	At1g79620	^ ^LRR VIII-1 ;Receptor kinase-like protein family;kinase activity^ ^leucine-rich repeat transmembrane protein kinase, putative similar to receptor protein kinase GI:1389566 from [Arabidopsis thaliana]^	-1.48547	1	1.6599	1	1.48393	1	-1.0932	1	-1.79179	6.91219e-09	207.138	165.338	265.759	303.522	274.602	184.333
A	At1g79840	^GLABRA2^ATHB10^ TF ^HB^HD-Zip IV / HD ZLZ START^homeobox-leucine zipper protein 10 (HB-10) / HD-ZIP transcription factor 10 / homeobox protein (GLABRA2) identical to homeobox protein (GLABRA2) (homeobox-leucine zipper protein ATHB-10) (HD-ZIP protein ATHB-10) GB:P46607 [Arabidopsis thaliana]^	-2.1211	6.81641e-08	1.02531	1	-1.1004	1	-1.40828	1	1.01727	1	573.94	278.583	287.786	207.534	147.645	148.367
A	At1g80050	^ADENINE PHOSPHORIBOSYL TRANSFERASE 2^Adenine phosphoribosyltransferase 1 APRT family;adenine phosphoribosyltransferase activity;nucleotide metabolism^ADENINE PHOSPHORIBOSYLTRANSFERASE^adenine phosphoribosyltransferase 2 (APT2) identical to SP|Q42563 Adenine phosphoribosyltransferase 2 (EC 2.4.2.7) (APRT) {Arabidopsis thaliana}^	-1.53158	1	-1.55435	1	-1.33322	1	-2.54504	1.22323e-15	-1.18655	1	11496.7	8364.72	5622.72	4939.06	2269.94	1860.09
E	At1g80080	^TOO MANY MOUTHS^Glycosylphosphatidylinositol (GPI)-anchored proteins;GPI-anchored protein;endomembrane system^Receptor like (Cf-2/Cf-5 like)^leucine-rich repeat family protein contains leucine rich-repeat domains Pfam:PF00560, INTERPRO:IPR001611; contains some similarity to Hcr2-5D [Lycopersicon esculentum] gi|3894393|gb|AAC78596^	1.80943	2.00431e-07	-1.24515	1	1.08105	1	2.16155	0.100264	1.41401	0.26238	2055.5	3338.02	2902.64	3358.31	6157.44	7657.01
B	At1g80100	^ ^Histidine Phosphotransfer Proteins^ ^phosphotransfer family protein similar to histidine-containing phosphotransfer protein [Catharanthus roseus] GI:13774348, ATHP3 [Arabidopsis thaliana] GI:4156245^	1.26304	1	-1.01504	1	-1.0642	1	-1.34773	1	-2.00168	0.0114481	4933.81	6363.81	6453.78	5575.35	3920.52	2134.52
C	At1g80200	^ ^endomembrane system^ ^expressed protein ; expression supported by MPSS^	1.26005	1	1.29763	1	1.14932	1	-1.08359	1	-1.61663	0.000557361	4404.88	4757.22	4896.52	5094.82	4481.26	3407.77
E	At1g80360	^ ^asparagine catabolism;asparagine degradation 1;aspartate biosynthesis and degradation;glutamate degradation VII^ASPARTATE AMINOTRANSFERASE^aminotransferase class I and II family protein low similarity to GI:14278621 Aromatic Aminotransferase from Pyrococcus horikoshii^	-1.01047	1	1.67897	1	1.72126	1	2.11634	1.31185e-19	1.91965	1	1101.86	1589.92	1876.76	2916.76	4135.95	6609.08
B	At1g80460	^GLI1^glycerol kinase activity;glycerol metabolism;aerobic glycerol catabolism^GLYCEROL KINASE^glycerol kinase, putative similar to glycerol kinase (ATP:glycerol 3-phosphotransferase, Glycerokinase, GK)[Mycobacterium tuberculosis] Swiss-Prot:O69664^	1.52478	0.00148349	1.15656	1	1.01963	1	1.37848	1	1.07903	1	2976.31	4234.02	3687.33	3501.26	3389.87	3548.98
E	At1g80510	^ ^AAAP(Amino Acid/Auxin Permease);AAAP family;amino acid permease activity^ ^amino acid transporter family protein similar to amino acid transporter system N2 [Rattus norvegicus] GI:14578932; contains Pfam profile PF01490: Transmembrane amino acid transporter protein^	1.0583	1	1.01401	1	1.1975	1	-1.0247	1	1.5542	0.000491064	784.399	800.422	856.393	1242.05	1020.1	1576.57
B	At1g80580	^ ^ ^ TF ^AP2/ERF^ERF-EREBP^ethylene-responsive element-binding family protein contains AP2 DNA-binding domain; similar to EREBP-3 (GI:1208496) [Nicotiana tabacum]^	1.73202	0.131884	-1.52622	1	-1.61758	8.3427e-06	-2.34373	0.000247432	-2.99043	1	687.333	1160.69	851.161	660.922	285.774	96.3698
B	At1g80615	AT1G80615_1 unknown protein similar to ribosomal protein S15 GB AAD36415 from Thermotoga maritima	-1.17113	1	1.17973	1	-1.06475	1	-1.22709	1	1.46378	0.00288774	1677.95	1651.55	1575.17	1314.12	1200.8	1424.04
E	At1g80640	^ ^Unknown ;Receptor kinase-like protein family;kinase activity^ ^protein kinase family protein contains protein kinase domain, Pfam:PF00069^	-1.03244	1	-1.14647	1	-1.07912	1	1.53611	6.53292e-10	1.21703	1	3767.13	3970.3	3552.57	4081.82	6062.62	5919.84
C	At1g80730	^ ^ ^ TF ^C2H2 (Zn)^ ^zinc finger (C2H2 type) family protein (ZFP1) identical to zinc finger protein, ZFP1 gi|790673|gb|AAA87297; contains zinc finger, C2H2 type, domain, Prosite:PS00028^	9.95403	3.47438e-32	-1.35393	1	1.17697	1	-1.00071	1	-1.60451	1	62.1205	588.457	470.514	449.125	335.121	216.389
A	At1g80760	^ ^MIP(The Major Intrinsic Protein);Aquaporin Families;MIP family;water channel activity^Delta tonoplast integral protein family^major intrinsic family protein / MIP family protein contains Pfam profile: MIP PF00230^	-1.82923	0.00123666	1.05761	1	1.32472	1	-1.05132	1	1.10408	1	389.863	197.904	184.25	271.85	211.181	253.865
B	At1g80810	^ ^ ^ ^expressed protein similar to androgen-induced prostate proliferative shutoff associated protein (GI:4559410) [Homo sapiens]; similar to bimD (GI:168025) [Emericella nidulans]^	-1.24139	1	-1.54321	1	-1.61655	0.00945928	1.14888	1	1.30438	1	2032.88	2037.71	2110.53	2097.27	1956.46	2214.69
A	At1g80990	^ ^ ^ ^XH domain-containing protein contains Pfam profile PF03469: XH domain^	-1.09786	1	1.40142	1	-1.52076	1	-1.04146	1	2.39195	7.6919e-11	108.274	95.0903	104.859	87.0332	67.9736	93.4779
D	At2g01150	^RING-H2 FINGER PROTEIN 2B^ubiquitin-protein ligase activity^ ^zinc finger (C3HC4-type RING finger) family protein contains Pfam profile: PF00097 zinc finger, C3HC4 type (RING finger)^	1.14201	1	1.2103	1	1.60039	0.000388667	1.34808	1	-1.0236	1	2175.56	2273.63	2870.24	5633.31	6986.34	7428.89
B	At2g01310	^ ^ ^ ^expressed protein ^	-1.05545	1	2.07682	0.109344	-1.19738	1	-1.16772	1	1.80991	0.00229242	345.133	395.502	515.374	386.049	325.573	367.676
E	At2g01420	^PIN-FORMED 4^auxin;EMB;AEC(Auxin Efflux Carrier);Organic Solute Cotransporters;transporter activity^auxin efflux carrier;Embryo Defective;Similarity to auxin transport protein family^auxin transport protein, putative similar to auxin transport protein PIN7[Arabidopsis thaliana] gi|5817305|gb|AAD52697^	1.06427	1	-1.0027	1	1.20441	1	2.25854	9.8605e-09	1.2384	1	719.531	837.007	897.815	860.055	1458.17	2201.08
C	At2g01430	^ ^ ^ TF ^HB^HD-Zip II^homeobox-leucine zipper protein 17 (HB-17) / HD-ZIP transcription factor 17 identical to (GI:18857716) homeodomain-leucine zipper protein ATHB-17 (GI:18857716) [Arabidopsis thaliana]^	2.54196	1.29107e-18	-1.06371	1	-1.43411	1	1.11116	1	1.51027	1	250.112	587.193	549.702	436.163	470.802	551.197
E	At2g01520	^ ^ ^ ^major latex protein-related / MLP-related low similarity to major latex protein {Papaver somniferum}[GI:169000] contains Pfam profile PF00407: Pathogenesis-related protein Bet v I family^	1.27781	1	1.05143	1	2.69921	0.7932	4.62106	4.75313e-15	1.565	1	308.934	404.761	505.737	1034.93	2676.76	4708.61
D	At2g01670	^ ^mitochondrion^ ^MutT/nudix family protein similar to SP|Q09790 Diadenosine 5',5'''-P1,P6-hexaphosphate hydrolase (EC 3.6.1.-) (Ap6A hydrolase) {Schizosaccharomyces pombe}; contains Pfam profile PF00293: NUDIX domain^	-1.06015	1	1.66893	0.0720147	2.17976	0.0131211	1.47504	1	1.12057	1	652.659	708.533	934.472	2078.3	3216.23	3291.57
E	At2g01890	^PURPLE ACID PHOSPHATASE PRECURSOR^endomembrane system^ ^purple acid phosphatase, putative contains Pfam profile: PF00149 calcineurin-like phosphoesterase; identical to purple acid phosphatase (GI:20257479) [Arabidopsis thaliana];^	-1.3176	1	-1.14938	1	1.31987	1	1.79147	7.55016e-11	1.20689	1	244.207	198.701	179.621	221.482	363.008	368.487
B	At2g01950	^ ^LRR XI & LRR XII ;mitochondrion^ ^leucine-rich repeat transmembrane protein kinase, putative similar to brassinosteroid insensitive protein^	1.16227	1	-1.54552	4.55134e-06	-1.27653	1	-1.1321	1	1.34328	3.27512e-06	2428.66	3201.44	1998.1	1536.75	1688.27	2483.24
E	At2g01990	^ ^ ^ ^expressed protein ^	-1.50305	1	-1.13616	1	1.13807	1	1.54151	1.13678e-11	1.02737	1	3579.62	3042.73	2949.41	3218.22	4725.09	5475.18
D	At2g02080	^ ^ ^ TF ^C2H2 (Zn)^ ^zinc finger (C2H2 type) family protein contains Pfam domain PF00096: Zinc finger, C2H2 type^	1.28419	1	1.73725	1.63199e-06	1.44571	1	1.30938	0.0247388	1.12063	1	332.494	342.22	448.44	694.121	908.267	1036.69
D	At2g02130	^ ^endomembrane system^ ^plant defensin-fusion protein, putative (PDF2.3) plant defensin protein family member, personal communication, Bart Thomma (Bart.Thomma@agr.kuleuven.ac.be)^	-2.12549	0.0306107	-1.12485	1	1.23055	1	1.19906	1	-1.27945	1	15779.2	12452.8	15502.7	18184.6	17323.3	15277.1
A	At2g02320	^ATPP2-B7^F-box (FBX);mitochondrion^E^F-box family protein / SKP1 interacting partner 3-related contains similarity to SKP1 interacting partner 3 GI:10716951 from [Arabidopsis thaliana]^	-1.54102	7.22133e-09	-1.47209	1	1.17819	1	1.15039	1	1.14956	1	10541.1	7252.22	7972.48	6607.22	7657.07	7441.98
D	At2g02795	^ ^ ^ ^hypothetical protein ^	1.26003	1	1.57666	1	1.81011	0.033961	1.48784	1	-1.29253	1	113.551	140.096	191.9	511.8	801.716	681.531
B	At2g03110	^ ^ ^ ^KH domain-containing protein ^	-1.33638	1	2.47539	1	-1.96091	1	1.33434	1	1.81928	0.0479679	296.9	302.326	370.964	210.025	291.1	129.224
E	At2g03130	^ ^structural constituent of ribosome^ ^ribosomal protein L12 family protein ^	-2.01632	0.00281207	-1.90795	1	1.87092	0.115006	1.69992	1	-1.02779	1	468.914	282.207	195.536	445.953	550.524	525.578
D	At2g03505	^ ^endomembrane system^ ^glycosyl hydrolase family protein 17 similar to Glucan endo-1,3-beta-glucosidase precursor (EC 3.2.1.39) ((1-3)-beta- glucan endohydrolase) ((1-3)-beta-glucanase) (Beta-1,3- endoglucanase) (Swiss-Prot:P52409) [Triticum aestivum]; similar to beta 1,3-glucanase (GI:924953) [Triticum aestivum]^	1.86097	0.00043731	1.62883	0.128276	1.23891	1	1.34487	1	-1.51826	0.244903	1092.45	1840	2566.88	2796.74	3176.59	2503.93
B	At2g03620	^ ^MRS2(Mitochondrial mRNA Splicing-2 Protein);AtMRS2;Magnesium Transporters^ ^magnesium transporter CorA-like family protein (MRS2-5) weak similarity to SP|Q01926 RNA splicing protein MRS2, mitochondrial precursor {Saccharomyces cerevisiae}; contains Pfam profile PF01544: CorA-like Mg2+ transporter protein; supporting cDNA gi|25360881|gb|AY150290.1|^	1.22795	1	1.11414	1	-1.02959	1	1.10227	1	-1.38257	0.00190865	2171.82	2821.01	2665.65	2428.49	2767.43	2495.05
C	At2g03710	^SEPALLATA4^AGL3^ TF ^MADS^Type II (MIKCc)^MADS-box protein (AGL3) ^	1.34169	1	1.02075	1	-1.10671	1	-1.39834	0.013333	-1.09295	1	6603.22	6283.86	8121.83	8010.85	7429.32	7698.45
B	At2g03810	^ ^ ^ ^18S pre-ribosomal assembly protein gar2-related contains weak similarity to Swiss-Prot:P41891 protein gar2 [Schizosaccharomyces pombe]^	1.23292	1	1.52259	1	-1.21357	1	-1.52161	1	1.69431	0.00651039	1075.6	1285.49	1581.63	1187.14	1091.95	1090.65
A	At2g04063	^ ^endomembrane system^ ^glycine-rich protein ^	-1.90167	0.00195898	-2.06909	2.32449e-36	1.05969	1	-1.95177	0.0129375	1.03878	1	2992.09	1496.36	765.848	683.281	346.311	410.397
E	At2g04160	^ ^subtilases (subtilisin ? like serine proteases) ;endomembrane system^ ^subtilisin-like protease (AIR3) almost identical to subtilisin-like protease AIR3 GI:4218991 from [Arabidopsis thaliana], missing 200 aa at N-terminus^	-1.11061	1	1.06367	1	1.1265	1	1.3692	0.000612034	1.71866	1	852.211	884.98	955.604	1152.35	1766.07	2656.31
E	At2g04570	^ ^endomembrane system^ ^GDSL-motif lipase/hydrolase family protein similar to family II lipase EXL3 (GI:15054386), EXL1 (GI:15054382), EXL2 (GI:15054384) [Arabidopsis thaliana]; contains Pfam profile PF00657: Lipase/Acylhydrolase with GDSL-like motif^	1.17852	1	1.30801	1	1.45155	0.0458796	1.66595	1	3.16374	1	1275.72	1478.43	1808.91	2638.51	5001.58	14471.6
A	At2g04795	^ ^mitochondrion^ ^expressed protein ^	-1.50012	1	-2.12479	0.00672567	1.04193	1	-1.46845	1	-1.04753	1	344.886	195.472	128.659	109.3	75.1419	59.6842
A	At2g05380	^GLYCINE-RICH PROTEIN 3 SHORT ISOFORM^endomembrane system^ ^glycine-rich protein (GRP3S) identical to cDNA glycine-rich protein 3 short isoform (GRP3S) GI:4206766^	-3.31463	3.29567e-10	-1.37761	1	1.88145	1	1.22531	1	2.05601	1	6600.88	3258.73	1939.85	2635.65	3136.05	6402.7
A	At2g05530	^ ^endomembrane system^ ^glycine-rich protein ^	-2.14682	5.63305e-10	-1.32115	1	1.21818	1	-1.00057	1	-1.0911	1	4042.46	2078.61	1481.61	1663.11	1354.15	1064.14
E	At2g05940	^ ^RLCK VII ;protein kinase activity^ ^protein kinase, putative similar to auxin-regulated dual specificity cytosolic kinase [Lycopersicon esculentum] gi|14484938|gb|AAK62821^	-1.07802	1	1.03321	1	1.13371	1	1.51663	0.00797793	1.18059	1	728.319	750.152	813.1	882.785	1038.58	1202.93
E	At2g06025	^ ^mitochondrion^ ^GCN5-related N-acetyltransferase (GNAT) family protein low similarity to streptothricin acetyltransferase homolog [Campylobacter jejuni] GI:6650363; contains Pfam profile PF00583: acetyltransferase, GNAT family^	3.16564	0.0397495	-1.35875	1	1.72217	1	2.04647	1	1.52002	1	735.459	1029.26	1082.97	1624.13	1413.65	2906.37
A	At2g07680	^ ^ABC(ATP-Binding Cassette);ABC Superfamily;ABC transporters;ATP-binding cassette (ABC) transporter activity^MRP subfamily;ABC transporter-like^ABC transporter family protein ^	-1.51394	1	-1.08592	1	-1.01648	1	-1.20489	1	-1.64158	4.06873e-05	1598.93	1392.54	1058.05	818.545	767.443	552.427
A	At2g07705	^ ^ ^ ^hypothetical protein ^	-1.56988	0.00540729	1.12488	1	1.20401	1	1.08179	1	-1.04523	1	561.585	395.167	454.535	445.348	479.274	434.871
B	At2g08986	^ ^ ^ ^hypothetical protein ^	1.14821	1	1.06435	1	-1.58673	2.4221e-20	-1.24804	1	1.38664	1	1649.72	2356.44	2668.72	2224.89	1583.83	1629.73
E	At2g10940	^ ^endomembrane system^ ^protease inhibitor/seed storage/lipid transfer protein (LTP) family protein similar to proline-rich cell wall protein [Medicago sativa] GI:3818416; contains Pfam profile PF00234 Protease inhibitor/seed storage/LTP family^	-2.77455	0.000211128	1.19579	1	2.52167	1.30847e-05	1.81209	1	2.66315	0.000631604	5073.07	2110.91	1757.34	3422.72	7206.39	14705.6
B	At2g11000	^MAK10^ ^ ^natC N(alpha)-terminal acetyltransferase, Mak10 subunit family protein contains Pfam PF04112: Mak10 subunit, NatC N(alpha)-terminal acetyltransferase; similar to corneal wound healing related protein (GI:8926320) [Rattus norvegicus]; weak similarity to Glucose repressible protein MAK10 (Swiss-Prot:Q02197) [Saccharomyces cerevisiae]^	1.00408	1	1.04036	1	-1.06254	1	1.20335	1	-1.52605	2.51664e-05	11237.1	11974.8	9208.38	9507.29	11867.2	9034.79
E	At2g11260	AT2G11260_1 unknown protein	4.18339	0.00307429	-1.19711	1	1.70671	1	14.4042	0.26246	2.37917	0.00255166	476.545	1246.73	933.99	588.679	1192.65	2713
D	At2g13580	AT2G13580_1 unknown protein	-1.0846	1	1.33266	1	2.17931	8.54912e-12	1.06466	1	-1.09217	1	2323.69	2136.91	2426.08	3810.98	3339.56	3533.28
B	At2g14210	^ANR1^AGL44^ TF ^MADS^Type II (MIKCc)^MADS-box protein (ANR1) identical to ANR1, MADS-box protein [Arabidopsis thaliana] GI:2959320^	-1.17093	1	-1.31125	1	-1.09332	1	-1.50516	0.00026464	1.05784	1	1631.88	1420.77	1214.97	921.745	600.046	462.478
B	At2g14500	^ ^F-box (FBX)^C5^F-box family protein contains F-box domain Pfam:PF00646^	1.16339	1	1.24696	1	1.05155	1	1.10193	1	-1.92725	5.3176e-05	677.064	805.503	552.243	558.898	756.193	634.845
C	At2g14660	^ ^ ^ ^expressed protein contains Pfam PF04543: Family of unknown function (DUF589); similar to cThy28kD (GI:995778) [Gallus gallus]; similar to thymocyte protein mThy28 (GI:23978374) [Mus musculus]^	1.09284	1	-1.25198	1	-1.19602	1	1.59314	1	1.99523	2.74814e-08	558.758	714.592	1027.93	897.304	755.634	771.474
B	At2g14800	^ ^ ^ ^hypothetical protein ^	-1.04444	1	1.07727	1	-1.25164	1	-1.05489	1	1.44935	1.26683e-05	533.219	557.31	594.435	463.43	454.27	521.93
D	At2g14890	^ARABINOGALACTAN PROTEIN 9^GPI-anchored protein;Structural proteins;chloroplast^Classical AGPs;Arabinogalactan-proteins (AGPs)^arabinogalactan-protein (AGP9) identical to gi|10880495|gb|AAG24277^	-1.68174	1	2.12822	0.000234321	1.92969	1	-2.04726	0.0170447	1.35791	1	15301.1	12736.2	14935	19971.1	12871.5	18312.2
A	At2g14900	^ ^endomembrane system^ ^gibberellin-regulated family protein similar to SP|P46690 Gibberellin-regulated protein 4 precursor {Arabidopsis thaliana} GASA4; contains Pfam profile PF02704: Gibberellin regulated protein^	-2.09586	1.76011e-12	-1.19801	1	1.32234	1	1.64023	0.181844	1.02001	1	2006.29	742.898	806.149	1022.47	1186.95	1252.43
A	At2g16060	^HEMOGLOBIN^response to hypoxia^ ^non-symbiotic hemoglobin 1 (HB1) (GLB1) identical to SP|O24520 Non-symbiotic hemoglobin 1 (Hb1) (ARAth GLB1) {Arabidopsis thaliana}^	-1.42305	1	-2.06164	5.90209e-05	1.31066	1	-1.08152	1	-1.35334	1	962.72	572.85	413.524	494.372	468.439	363.515
B	At2g16090	^ ^Arabidopsis ARIADNE gene family: subfamily A^ ^zinc finger protein-related contains similarity to zinc finger proteins and Pfam domain, PF01485: IBR domain^	1.16122	1	1.14499	1	-1.0014	1	-1.01181	1	-1.24992	4.65343e-05	2098.95	2208.48	2062.78	2109.13	2163.72	1924.54
E	At2g16660	^ ^Nodulin-like protein family;endomembrane system^ ^nodulin family protein similar to nodulin-like protein [Arabidopsis thaliana] GI:3329368, nodule-specific protein Nlj70 [Lotus japonicus] GI:3329366^	-1.21995	1	-1.00252	1	1.4568	1	1.48501	2.11533e-10	1.21491	1	4589.24	4281.93	3126.08	4289.94	6708.28	9221.8
B	At2g16700	^ACTIN DEPOLYMERIZING FACTOR 5^actin depolymerizing activity^ ^actin-depolymerizing factor 5 (ADF5) identical to SP|Q9ZNT3 Actin-depolymerizing factor 5 (ADF-5) (AtADF5) {Arabidopsis thaliana}^	1.00453	1	-1.29544	0.0385557	1.14279	1	-1.18221	1	-1.17154	1	5147.98	4898.56	3954.13	4019.16	3166.65	2455.92
B	At2g16720	^ ^AtMYB7^ TF ^MYB-(R1)R2R3^ ^myb family transcription factor contains Pfam profile: PF00249 myb-like DNA-binding domain^	-1.20421	1	1.12761	1	1.05417	1	-1.06664	1	-1.47425	0.031921	304.689	321.709	348.724	305.886	281.846	212.739
C	At2g17450	^RING-H2 FINGER PROTEIN RHA3A^ ^ ^zinc finger (C3HC4-type RING finger) family protein contains Pfam domain, PF00097: Zinc finger, C3HC4 type (RING finger)^	1.02258	1	1.67307	0.000480645	1.07683	1	-1.48463	1	-1.15974	1	7271.93	7458.81	8323.61	8713.21	8675.29	7994.7
A	At2g17770	^ ^AtbZIP27^ TF ^bZIP^ ^ABA-responsive element binding protein, putative similar to ABA response element binding factor [Triticum aestivum] gi|21693583|gb|AAM75354^	-1.91788	0.000881586	-1.21332	1	-1.12639	1	-1.62333	1	1.09711	1	5753.54	2699.83	2332.52	2615.3	1490.26	1645.75
B	At2g17950	^WUSCHEL^ ^ TF ^HB^WUS-like^homeodomain transcription factor (WUSCHEL) 99.4% identical to WUSCHELL (GI:4090200) [Arabidopsis thaliana]^	1.57174	1	-1.6812	0.52544	-1.50092	1	-1.63889	0.0141224	1.07077	1	1583.35	2154.79	1303.48	865.364	498.459	612.003
A	At2g18020	^EMBRYO DEFECTIVE 2296^EMB;structural constituent of ribosome^Embryo Defective^60S ribosomal protein L8 (RPL8A) ^	-1.11707	1	-1.07925	1	1.42894	1	-3.20654	2.19361e-05	1.3895	1	24436.6	17243.7	24420.8	21130.2	15976	18827
D	At2g18120	^ ^SRS4^ TF ^SRS (Zn)^ ^lateral root primordium (LRP) protein-related similar to lateral root primordium 1 (LRP1) [Arabidopsis thaliana] GI:882341; contains Pfam profile PF05142: Domain of unknown function (DUF702)^	1.42872	1	1.21138	1	1.89117	3.57445e-07	1.48323	0.52438	1.05593	1	990.184	1366.03	1654.31	2983.55	4040.35	4341.94
C	At2g18500	^ ^chloroplast^ ^ovate family protein 69% similar to ovate protein (GI:23429649) [Lycopersicon esculentum]; contains TIGRFAM TIGR01568 : uncharacterized plant-specific domain TIGR01568^	-1.00301	1	1.81423	3.35387e-06	1.06281	1	-1.30767	1	-1.06652	1	2053.56	2344.53	3910.33	4367.93	3192.97	2427.38
B	At2g18510	^EMBRYO DEFECTIVE 2444^EMB^Embryo Defective^pre-mRNA splicing factor, putative similar to SP|Q15427 Splicing factor 3B subunit 4 (Spliceosome associated protein 49) (SAP 49) (SF3b50) (Pre-mRNA splicing factor SF3b 49 kDa subunit) {Homo sapiens}; contains Pfam profile PF00076: RNA recognition motif. (a.k.a. RRM, RBD, or RNP domain)^	-1.17784	1	1.1276	1	-1.01561	1	-1.43778	3.50975e-06	1.06002	1	7405.35	6593.6	7517.26	8060.13	5827.44	6616.85
A	At2g18550	^ ^ ^ TF ^HB^HD-Zip I^homeobox-leucine zipper family protein similar to CRHB6 (GI:3868839) [Ceratopteris richardii]; contains Pfam PF00046: Homeobox domain^	-2.27531	3.99622e-06	-1.24243	1	-1.18415	1	-1.60365	0.26246	-1.17534	1	11044.7	8007.49	7604.93	7494.17	5319.33	4849.52
A	At2g18660	^ ^endomembrane system^ ^expansin family protein (EXPR3) identical to Expansin-related protein 3 precursor (Ath-ExpGamma-1.2) (Swiss-Prot:Q9ZV52) [Arabidopsis thaliana]; contains Prosite PS00092: N-6 Adenine-specific DNA methylases signature;^	-1.67983	0.000371493	-1.55577	0.0105331	1.04545	1	-1.18115	1	-1.07797	1	4936.02	3333.87	2178.16	2554.5	2092.89	2097.7
D	At2g19310	^ ^chloroplast^ ^expressed protein ^	1.71507	0.00538146	1.13168	1	1.17801	1	1.27188	1	-1.14733	1	373.72	641.06	665.643	691.346	1054.28	897.498
A	At2g19650	^ ^molecular_function unknown^ ^DC1 domain-containing protein contains Pfam profile PF03107: DC1 domain^	-1.40021	0.00059247	-1.24015	1	1.00965	1	1.22869	1	1.28812	1	1138.05	839.317	716.905	800.159	898.117	1058.02
A	At2g19800	^ ^ ^ ^expressed protein similar to myo-inositol oxygenase [Sus scrofa] gi|17432544|gb|AAL39076^	-5.45759	5.71872e-31	3.43935	0	1.56505	1	-1.72121	1.94417e-06	-1.66295	1	4914.36	1143.36	2731.7	3907.8	3075.55	2198.08
B	At2g19950	^ ^ ^ ^expressed protein contains 2 transmembrane domains; weak similarity to HPSR2 - heavy chain potential motor protein (GI:871048) [Giardia intestinalis]^	1.0591	1	1.11344	1	-1.41341	1	-1.5682	0.0139123	1.71729	8.07941e-05	550.018	671.727	722.723	496.287	507.844	586.511
B	At2g20400	^ ^ ^ TF ^GARP^ ^myb family transcription factor contains Pfam profile: PF00249 myb-like DNA-binding domain^	-1.1226	1	-1.67168	0.0123847	-1.36808	1	-1.09271	1	-1.05838	1	3236.51	3330.7	2545.17	2069.84	2079.96	2080.72
A	At2g20670	^ ^sugar porter activity^ ^expressed protein contains Pfam profile PF04720: Protein of unknown function (DUF506)^	-4.54997	0	1.60175	1	2.49527	0.00465168	-1.04212	1	-1.5	0.000136299	2449.43	1105.39	1111.18	2609.34	2011.46	1619.68
E	At2g20870	^ ^endomembrane system^ ^cell wall protein precursor, putative identical to Putative cell wall protein precursor (Swiss-Prot:P47925) [Arabidopsis thaliana]; weak similarity to mu-protocadherin (GI:7861967) [Rattus norvegicus]^	1.82097	1	1.42753	1	3.10231	0.000428534	2.54104	1	6.34026	0.00153015	274.55	548.493	899.054	1787.56	4957.76	28101.7
E	At2g20875	^ ^endomembrane system^ ^hypothetical protein ^	-1.05313	1	-1.16288	1	-1.01615	1	1.42609	1	2.25027	0.0216777	109.129	113.333	97.7492	106.828	257.782	461.567
B	At2g20890	^ ^chloroplast^ ^expressed protein ^	1.09087	1	-1.00222	1	-1.0019	1	-1.09721	1	1.52211	0.0157223	913.121	997.526	985.239	955.836	862.424	917.065
A	At2g21210	^ ^Nitrate Metabolism;SAUR;mitochondrion^NO3resp-Aux-ind^auxin-responsive protein, putative similar to small auxin-up regulated protein SAUR (GI:3043536) [Raphanus sativus]^	-1.69831	0.00258119	-1.32837	1	1.24186	1	-1.17914	1	-1.10368	1	1296.23	650.778	492.971	442.847	306.265	355.489
E	At2g21550	^ ^membrane;formylTHF biosynthesis;folic acid biosynthesis^DIHYDROFOLATE REDUCTASE^bifunctional dihydrofolate reductase-thymidylate synthase, putative / DHFR-TS, putative similar to THY-1 [SP| Q05762] and THY-2 [SP|Q05763] from Arabidopsis thaliana; contains Pfam profiles PF00303 thymidylate synthase and PF00186 dihydrofolate reductase^	-1.11006	1	1.63042	1	1.52878	1	1.91494	0.000548509	-1.00442	1	143.072	112.395	128.038	200.67	329.98	300.795
A	At2g21640	^ ^ ^ ^expressed protein ^	-1.34484	1	-1.63719	1.31439e-08	1.10367	1	-1.01907	1	-1.0764	1	3799.59	3156.4	2457.83	2444.25	1905.9	1661
C	At2g21780	^ ^ ^ ^expressed protein ^	1.20611	1	1.0129	1	1.21797	1	-1.09666	1	-1.46299	0.0147727	555.527	633.237	743.453	845.317	750.279	577.282
B	At2g21860	^ ^chloroplast^ ^violaxanthin de-epoxidase-related contains weak similarity to violaxanthin de-epoxidase precursor gi|1438875|gb|AAC49373^	-1.12864	1	1.02285	1	-2.26289	1	1.05074	1	2.05591	6.10697e-08	589.25	549.971	656.215	515.134	545.784	404.434
E	At2g21880	^ ^small GTPase(RAB);two-component signal transduction system (phosphorelay)^ ^Ras-related GTP-binding protein, putative similar to Ras family GTP-binding protein SP:Q43463 from [Glycine max]^	-1.30272	1	1.52065	9.68495e-06	1.51226	1	1.68334	3.38722e-10	1.91078	1	133.171	118.419	140.772	201.887	361.189	655.885
E	At2g22170	^ ^endomembrane system^ ^lipid-associated family protein contains PLAT/LH2 (Polycystin-1, Lipoxygenase, Alpha-Toxin/Lipoxygenase homology) domain Pfam:PF01477^	-1.82933	7.23462e-23	-1.54444	1	3.21608	3.45023e-36	3.10304	0	-1.03078	1	2659.25	1542.8	1289.84	3738.91	8137.46	10229.2
A	At2g22190	^ ^ trehalose biosynthesis;trehalose degradation, low osmolarity;trehalose anabolism ^TREHALOSE-6-PHOSPHATE PHOSPHATASE^trehalose-6-phosphate phosphatase, putative similar to trehalose-6-phosphate phosphatase (AtTPPB) [Arabidopsis thaliana] GI:2944180; contains Pfam profile PF02358: Trehalose-phosphatase^	-2.07119	2.20689e-09	-1.2487	1	-1.16109	1	-1.19788	1	1.36408	1	1527.74	936.27	849.658	626.419	547.182	668.713
A	At2g22540	^SHORT VEGETATIVE PHASE^AGL22^ TF ^MADS^Type II (MIKCc)^short vegetative phase protein (SVP) identical to cDNA short vegetative phase protein (SVP) GI:10944319;^	-1.6947	0.000160557	-2.16648	4.83107e-11	-1.29674	1	-2.49499	1.81216e-23	-1.74136	0.025524	8567.9	6298.03	4346.7	3569.13	1414.99	913.151
B	At2g22610	^ ^Kinesins;microtubule associated complex^Kinesin-like proteins^kinesin motor protein-related ^	1.13832	1	1.5515	0.0217072	-1.40155	1	1.02244	1	1.33774	1	3229.77	3168.19	3831.81	3382.58	2640.9	3435.56
E	At2g22680	^ ^ ^ ^zinc finger (C3HC4-type RING finger) family protein contains Pfam profiles PF00097: Zinc finger, C3HC4 type (RING finger), PF00092: von Willebrand factor type A domain^	-1.21684	1	1.14874	1	1.21882	1	1.58396	0.00117289	1.26059	1	4919.73	4392.89	4353.5	4934.06	7274.76	8589.75
E	At2g22960	^ ^ACA;endomembrane system^ ^serine carboxypeptidase S10 family protein contains Pfam profile: PF00450 serine carboxypeptidase ;similar to sinapoylglucose:malate sinapoyltransferase GI:8699619 from [Arabidopsis thaliana]^	-1.29688	1	1.67009	1	1.66207	2.56873e-10	1.43729	0.52438	1.12118	1	584.865	536.261	783.756	1166.89	1593.03	2099.03
A	At2g22970	^ ^endomembrane system^ ^serine carboxypeptidase S10 family protein similar to serine carboxypeptidase I precursor (SP:P37890) [Oryza sativa]^	-1.69517	4.91619e-10	-1.12033	1	-1.04408	1	-1.10789	1	1.10073	1	7200.35	4692.56	4233.4	3926.04	3783.21	3626.93
D	At2g22980	^ ^endomembrane system^ ^serine carboxypeptidase S10 family protein similar to serine carboxypeptidase I precursor (SP:P37890) from [Oryza sativa]^	1.02531	1	1.4624	1	1.31034	1	-1.07812	1	1.61241	0.0321836	396.118	391.424	616.811	600.882	750.529	587.266
E	At2g23010	^ ^endomembrane system^ ^serine carboxypeptidase S10 family protein similar to serine carboxypeptidase I precursor (SP:P37890) [Oryza sativa]^	1.03136	1	1.20865	1	-1.00385	1	2.34149	0.0223166	1.91512	1.59975e-10	60.1582	73.875	95.8353	82.7155	209.738	404.833
E	At2g23180	^ ^Cytochrome P450;cytochrome P450 activity^CYP96A^cytochrome P450, putative ^	-2.0982	1	1.52297	1	2.40674	1.60529e-06	1.6712	1.53523e-05	1.23151	1	268.059	119.858	151.317	430.587	786.71	1073.35
B	At2g23200	^ ^CRPK1L-1 ;Receptor kinase-like protein family;kinase activity^ ^protein kinase family protein contains protein kinase domain, Pfam:PF00069^	1.03788	1	-1.44634	0.000432863	-1.14491	1	1.14216	1	1.07447	1	2055.8	2390.35	1429.7	1293.69	1752.18	1492.32
D	At2g23430	^Kip-related protein 1^Core Cell Cycle Genes;mitochondrion^ ^kip-related protein 1 (KRP1) / cyclin-dependent kinase inhibitor 1 (ICK1) identical to cyclin-dependent kinase inhibitor (ICK1) [Arabidopsis thaliana] GI:3550262, GI:2052502^	1.19078	1	-1.19553	1	1.01479	1	1.57704	0.00255045	1.34005	1	139.119	161.146	294.448	315.748	363.061	433.851
E	At2g23560	^ ^endomembrane system^ ^hydrolase, alpha/beta fold family protein similar to ethylene-induced esterase [Citrus sinensis] GI:14279437, polyneuridine aldehyde esterase [Rauvolfia serpentina] GI:6651393; contains Pfam profile PF00561: hydrolase, alpha/beta fold family^	1.1635	1	1.16791	1	-1.07275	1	2.49415	0.194923	2.03268	2.33033e-14	30.5424	36.4085	37.2171	43.741	110.365	221.91
A	At2g23600	^ ^enzyme activity^ ^hydrolase, alpha/beta fold family protein similar to ethylene-induced esterase [Citrus sinensis] GI:14279437, polyneuridine aldehyde esterase [Rauvolfia serpentina] GI:6651393; contains Pfam profile PF00561: hydrolase, alpha/beta fold family^	-2.27036	6.79816e-06	-1.44275	1	-1.18719	1	-1.2164	1	-1.1799	1	1675.13	913.66	496.411	445.713	296.883	272.458
A	At2g23610	^ ^enzyme activity^ ^esterase, putative similar to ethylene-induced esterase [Citrus sinensis] GI:14279437, polyneuridine aldehyde esterase [Rauvolfia serpentina] GI:6651393; contains Pfam profile PF00561: hydrolase, alpha/beta fold family^	-2.34294	9.2372e-05	-1.78873	1.70734e-15	1.53694	1	-1.55566	1	1.01733	1	2024.44	1185.29	697.066	762.666	648.461	763.995
D	At2g23760	^ ^ ^ TF ^HB^HD-BELL^BEL1-like homeobox 4 protein (BLH4) ^	1.23039	1	2.43357	3.73156e-08	1.14982	1	1.09069	1	-1.09522	1	464.903	544.305	859.899	1239.38	1374.5	1286.76
A	At2g23950	^ ^LRR II & LRR X ;Receptor kinase-like protein family;kinase activity^ ^leucine-rich repeat family protein / protein kinase family protein contains Pfam domains PF00560: Leucine Rich Repeat and PF00069: Protein kinase domain^	-1.98539	2.23482e-11	1.02901	1	-1.02094	1	-1.0648	1	1.03506	1	4608.07	2870.42	3098.5	2949.79	2573.95	2934.95
A	At2g24070	^ ^chloroplast^ ^expressed protein contains Pfam domain, PF04484: Family of unknown function (DUF566)^	-1.75847	0.000118732	-1.419	1	1.0082	1	-1.17728	1	-1.08216	1	274.579	173.361	135.628	125.112	116.775	131.709
D	At2g24210	^ ^chloroplast^ ^myrcene/ocimene synthase (TPS10) nearly identical to GI:9957293; contains Pfam profile: PF01397 terpene synthase family^	1.63691	1	2.00831	0.00590615	1.27483	1	1.25537	1	1.10194	1	101.953	146.694	229.716	241.654	330.776	433.25
A	At2g24280	^ ^endomembrane system^ ^serine carboxypeptidase S28 family protein contains Pfam profile: PF05577 Serine carboxypeptidase S28^	-1.88247	0.000521473	1.0288	1	-1.12767	1	-1.1393	1	1.10182	1	2378.42	1194.94	1045.22	930.765	946.359	1216.36
E	At2g24560	^ ^endomembrane system^ ^GDSL-motif lipase/hydrolase family protein similar to family II lipase EXL3 GI:15054386 from [Arabidopsis thaliana]; contains Pfam profile PF00657: GDSL-like Lipase/Acylhydrolase^	-1.93902	0.0473062	1.18859	1	-1.13185	1	1.26232	1	3.65761	1	292.959	169.552	213.233	172.56	181.399	511.382
C	At2g24570	^ ^AtWRKY17^ TF ^WRKY^ ^WRKY family transcription factor identical to WRKY transcription factor 17 GI:15991743 from [Arabidopsis thaliana]^	-1.18734	1	1.54482	0.0385557	-1.01336	1	-1.28005	1	1.06802	1	2234.71	2169.09	3279.29	3416.96	2870.35	2985.93
A	At2g24762	^ ^ ^ ^expressed protein ^	-1.74558	9.3149e-12	-1.47648	1	1.15447	1	1.07008	1	-1.10335	1	692.556	457.147	336.751	423.948	400.238	345.235
C	At2g25170	^GYMNOS^Chromatin remodeling complex subunit R (SWI2/SNF2 homologs);nucleus^ ^chromatin remodeling factor CHD3 (PICKLE) identical to chromatin remodeling factor CHD3 [Arabidopsis thaliana] GI:6478518^	-1.14015	1	1.0714	1	-1.68716	4.65102e-18	1.0079	1	1.04567	1	437.056	454.647	526.118	467.285	536.978	465.23
B	At2g25750	AT2G25750_1 unknown protein	1.11008	1	-1.17481	1	-1.3392	0.0291918	-1.02561	1	-1.00863	1	10439.8	11901.8	10141.3	8842.8	10845.1	10393.9
E	At2g25790	^ ^LRR XI & LRR XII ;Receptor kinase-like protein family;kinase activity^ ^leucine-rich repeat transmembrane protein kinase, putative ^	1.39143	1	-1.22068	1	1.3742	1	2.79974	1.76738e-30	1.46056	1	340.477	435.251	407.196	479.502	1370.62	2282.74
D	At2g25810	^ ^MIP(The Major Intrinsic Protein);Aquaporin Families;MIP family;water channel activity^Delta tonoplast integral protein family^tonoplast intrinsic protein, putative similar to tonoplast intrinsic protein GI:4584429 from [Nicotiana tabacum]^	1.43175	1	1.98965	7.01342e-09	2.00065	0.000516331	1.31294	0.78531	1.00464	1	827.822	1234.69	2047.33	3614.79	5745.96	6210.83
B	At2g26010	^ ^ ^ ^plant defensin-fusion protein, putative (PDF1.3) plant defensin protein family member, personal communication, Bart Thomma (Bart.Thomma@agr.kuleuven.ac.be); similar to antifungal protein 1 preprotein [Raphanus sativus] gi|609322|gb|AAA69541^	1.11587	1	-2.35438	8.9797e-08	1.17494	1	-1.11813	1	-1.14086	1	941.986	1390.59	585.81	681.436	539.913	408.749
D	At2g26150	^ ^AtHsfA2^ TF ^HSF^ ^heat shock transcription factor family protein contains Pfam profile: PF00447 HSF-type DNA-binding domain^	2.73274	0.136544	-1.34869	1	1.30581	1	1.67174	1	-2.20297	1.6047e-05	511.668	1376.63	1072.7	1196.17	2062.2	1200.89
E	At2g26170	^ ^Cytochrome P450;cytochrome P450 activity^CYP711A^thromboxane-A synthase, putative / cytochrome P450 family protein simiar to Thromboxane-A synthase (TXA synthase) (TXS) (SP:P47787) [Sus scrofa]; contains Pfam profile: PF00067: Cytochrome P450; supported by cDNA: gi_15810029_gb_AY054283.1_^	-1.39577	0.25998	1.06012	1	1.26188	1	1.00844	1	1.63601	0.000118772	1379.41	1109.52	1036.16	1308.24	1198.67	1860.68
A	At2g26380	^ ^endomembrane system^ ^disease resistance protein-related / LRR protein-related contains leucine rich-repeat domains Pfam:PF00560, INTERPRO:IPR001611; similar to Hcr2-2A [Lycopersicon pimpinellifolium] gi|3894389|gb|AAC78594^	-1.69309	0.00275971	-1.09866	1	1.40439	1	-1.00095	1	-1.12077	1	1915.67	1074.46	1009.27	1490.41	1436.55	1501.72
D	At2g26400	^ ^ ^ ^acireductone dioxygenase (ARD/ARD') family protein similar to iron-deficiency induced gene [Hordeum vulgare] GI:14522834, SIPL [Homo sapiens] GI:16551383; contains Pfam profile PF03079: ARD/ARD' family^	-1.44869	1	2.68492	9.14269e-20	4.03476	4.85867e-09	2.04049	4.08839e-05	-1.09924	1	826.899	625.246	1169.73	4010.48	8661.77	9232.43
B	At2g26520	^ ^ATP binding activity^ ^expressed protein ^	1.03142	1	1.13339	1	-1.13673	1	1.11132	1	-1.55202	0.000326614	2801.28	3883.52	2812.28	2306.37	2060.19	1628.5
D	At2g26660	^ ^ ^ ^SPX (SYG1/Pho81/XPR1) domain-containing protein low similarity to NUC-2 [Neurospora crassa] GI:1399532, xenotropic and polytropic murine leukemia virus receptor [Mus musculus castaneus] GI:6093320; contains Pfam profile PF03105: SPX domain^	-1.19692	1	1.8973	1.3312e-06	1.22955	1	-1.07517	1	1.02125	1	3423.24	2845.64	5094.69	7199.41	6711.32	5757.43
E	At2g26740	^EPOXIDE HYDROLASE^Acyl Lipid Metabolism;enzyme activity^Epoxide Hydrolase^epoxide hydrolase, soluble (sEH) identical to ATsEH [Arabidopsis thaliana] GI:1109600^	-1.47735	0.00695333	-1.03111	1	1.33784	1	1.09974	1	1.05534	1	4514.17	3078.07	2611.3	3056.16	3945.92	4536.48
B	At2g26870	^ ^Acyl Lipid Metabolism;phospholipid biosynthesis;triglyceride biosynthesis^Non specific Phospholipase C;PHOSPHOLIPASE C^phosphoesterase family protein low similarity to SP|Q9RGS8 Non-hemolytic phospholipase C precursor (EC 3.1.4.3) (Phosphatidylcholine cholinephosphohydrolase) {Burkholderia pseudomallei}; contains Pfam profile PF04185: Phosphoesterase family^	1.11917	1	-1.01886	1	-1.03375	1	-1.06267	1	-1.37765	0.000979031	2204.23	2592.51	2664.53	2230.57	1811.07	1530.9
C	At2g27190	^PURPLE ACID PHOSPHATASE 1^endomembrane system^ ^iron(III)-zinc(II) purple acid phosphatase (PAP12) identical to iron(III)-zinc(II) purple acid phosphatase [precursor] SP:Q38924 from [Arabidopsis thaliana]^	-1.13147	1	1.49687	2.3938e-08	-1.08557	1	-1.29971	1	-1.31173	1	6604.78	6302.63	8350.95	9164.11	8170.82	8710.63
B	At2g27250	^CLAVATA 3^protein binding activity^ ^CLAVATA3 CLAVATA3/ESR-Related (CLE) family of proteins; ligand for CLV1; responsible for negative regulation of meristem cell differention and replacement^	1.39906	1	-1.11434	1	1.15274	1	-1.46072	1	-2.01533	1.51468e-11	898.747	1216.59	1008.57	1033.73	623.665	338.001
A	At2g27420	^ ^endomembrane system^ ^cysteine proteinase, putative contains similarity to cysteine protease SPCP1 GI:13491750 from [Ipomoea batatas]^	-2.9646	3.11255e-11	-1.25595	1	1.24602	1	-1.16859	1	1.05405	1	220.118	82.4547	74.2091	85.594	63.5112	64.4787
C	At2g27880	^ ^Argonaute^ ^argonaute protein, putative / AGO, putative similar to SP|O04379 Argonaute protein (AGO1) {Arabidopsis thaliana}; contains Pfam profiles PF02170: PAZ domain, PF02171: Piwi domain^	-1.14002	1	1.76009	0.000761956	-1.43253	1	-1.00185	1	1.62464	1	622.159	618.057	895.037	607.689	625.006	782.768
B	At2g28070	^ ^ABC(ATP-Binding Cassette);ABC Superfamily;ABC transporters;ATP-binding cassette (ABC) transporter activity^WBC subfamily;Putative ABC transporter^ABC transporter family protein ^	1.11399	1	1.09764	1	1.07983	1	-1.00045	1	-1.3867	0.00126519	7973.69	8095.1	8087.06	7277.1	7928.15	6745
A	At2g28085	^ ^ ^ ^auxin-responsive family protein similar to auxin-induced protein TGSAUR22 (GI:10185820) [Tulipa gesneriana]^	-2.52052	5.10085e-24	-2.59566	2.35637e-10	1.31594	1	-1.38448	1	-1.05028	1	8266.19	4740.32	1780	1600.27	834.689	742.029
E	At2g28140	^ ^mitochondrion^ ^expressed protein ^	-1.22977	1	-1.01266	1	1.41815	1	1.48722	0.039796	1.05232	1	373.151	282.755	295.991	463.961	612.366	732.76
B	At2g28320	^ ^ ^ ^pleckstrin homology (PH) domain-containing protein / lipid-binding START domain-containing protein contains Pfam profiles PF01852: START domain, PF00169: PH domain^	-1.03039	1	1.18753	1	-1.07433	1	-1.22094	1	1.40412	0.00083323	3632.25	3885.53	3812.84	3351.03	3196.13	4123.61
C	At2g28410	^ ^Glycosylphosphatidylinositol (GPI)-anchored proteins;GPI-anchored protein;endomembrane system^Unknown/hypothetical^expressed protein ^	1.12461	1	1.54755	7.1014e-12	1.20404	1	-1.16671	1	-1.02155	1	2472.57	2594.77	3742.24	4014.47	2917.5	2588.74
E	At2g28470	^ ^b-galactocidase;Glycoside Hydrolase Family 35;Hydrolases;Glycoside Hydrolase Gene Families;endomembrane system^Exo-acting glucanases;Glycoside Hydrolase Family 35^beta-galactosidase, putative / lactase, putative similar to Beta-galactosidase precursor SP:P48980 from [Lycopersicon esculentum]^	-1.19642	1	-1.08949	1	1.07346	1	1.85096	1.42402e-19	1.52006	0.252992	7153.99	5645.37	5318.92	5827.12	8691.43	11632.8
A	At2g28550	^TARGET OF EAT 1^ ^ TF ^AP2/ERF^AP2^AP2 domain-containing transcription factor RAP2.7 (RAP2.7) nearly identical to AP2 domain transcription factor RAP2.7 (GI:2281639) [Arabidopsis thaliana]^	-2.1307	2.59567e-19	-1.21911	1	-1.03267	1	1.03711	1	1.19718	1	644.259	347.834	325.124	354.31	352.445	448.619
B	At2g28605	^ ^chloroplast^ ^expressed protein ^	1.33716	0.000763338	-1.19625	1	1.12856	1	1.19967	1	1.10822	1	2779.07	4242.66	3348.36	3200.06	3937.26	3881.2
D	At2g28610	^PRESSED FLOWER^ ^ TF ^HB^WUS-like^homeobox-leucine zipper transcription factor (PRESSED FLOWER) identical to PRESSED FLOWER (GP:17907768) {Arabidopsis thaliana}^	1.21689	1	1.45549	0.137985	1.82055	5.1587e-18	1.30625	1	-1.2754	1	612.75	711.423	1199.6	1840.66	1748.99	1515.12
B	At2g28790	^ ^endomembrane system^ ^osmotin-like protein, putative similar to SP|Q41350 Osmotin-like protein precursor {Lycopersicon esculentum}; contains Pfam profile PF00314: Thaumatin family^	-2.66718	0.00860278	-2.33149	0.26297	-1.21773	1	1.39192	1	-1.67592	1	16218.5	12642	20400	16454.6	12598.9	10446
A	At2g28810	^ ^ ^ TF ^Dof (Zn)^ ^Dof-type zinc finger domain-containing protein similar to zinc finger protein OBP2 GI:5059394 from [Arabidopsis thaliana]^	-1.4572	0.000134259	-1.54641	0.00704315	1.08841	1	-1.09272	1	-1.13851	1	3235.86	2181.83	1907.07	1951	1383.28	1330.96
B	At2g30000	^ ^ ^ ^expressed protein contains Pfam domain PF03660: Uncharacterised protein family (UPF0123)^	-1.31336	1	1.01669	1	-3.52606	0.019543	-1.24652	1	2.52348	1	1731.25	1592.45	2445.59	1374.09	1347.2	857.03
A	At2g30010	^ ^chloroplast^ ^expressed protein ^	-1.6755	1.43294e-05	-1.72973	0.000785762	1.54452	1	1.37407	1	1.49959	1	6853.16	4564.14	2485.41	2530.13	3035.11	4846.88
A	At2g30370	^ ^chloroplast^ ^allergen-related weak similarity to pollen major allergen 2 protein [Juniperus ashei] gi|9955725|emb|CAC05582^	-1.32946	0.00441134	-1.01313	1	-1.30385	1	-1.04745	1	1.03384	1	351.235	297.879	237.234	186.446	171.412	193.384
C	At2g30490	^CINNAMATE-4-HYDROXYLASE^ Cytochrome P450;cytochrome P450 activity;phenylpropanoid pathway, initial reactions;phytoalexin biosynthesis;lignin biosynthesis ^CYP73A;cinnamate-4-hydroxylase;cinnamate 4-hydroxylase^trans-cinnamate 4-monooxygenase / cinnamic acid 4-hydroxylase (C4H) (CA4H) / cytochrome P450 73 (CYP73) (CYP73A5) identical to SP|P92994| Trans-cinnamate 4-monooxygenase (EC 1.14.13.11) (C…	1.05312	1	1.48923	2.71728e-07	1.01058	1	1.1431	1	-1.14472	1	6261.84	5978.97	7507.98	8994	8773.66	6142.58
B	At2g30540	^ ^endomembrane system^ ^glutaredoxin family protein contains INTERPRO Domain IPR002109, Glutaredoxin (thioltransferase)^	1.04487	1	-2.03013	8.71791e-05	-1.19232	1	-1.13742	1	-1.22743	1	579.994	635.227	393.756	309.919	279.888	225.857
A	At2g30750	^ ^Cytochrome P450;cytochrome P450 activity^CYP71A^cytochrome P450 71A12, putative (CYP71A12) Identical to Cytochrome P450 (SP:O49340) [Arabidopsis thaliana]; contains Pfam profile: PF00067 cytochrome P450^	-2.60388	8.12306e-13	-1.49182	1	1.45679	1	-1.92923	1	1.38169	1	343.831	106.398	61.5322	94.7009	38.7749	40.138
A	At2g30770	^ ^Cytochrome P450;cytochrome P450 activity^CYP71A^cytochrome P450 71A13, putative (CYP71A13) Identical to Cytochrome P450 71A13 (SP:O49342) [Arabidopsis thaliana]; similar to Cytochrome P450 (gi:5713172) [Nicotiana tabacum].^	-3.50023	2.93777e-24	-2.30424	1	2.32908	1	-2.25013	1	1.58485	1	876.717	307.486	153.874	235.584	109.458	112.97
B	At2g30890	^ ^endomembrane system^ ^membrane protein, putative similar to membrane protein SDR2 (GI:1747306) [Mus musculus]^	1.20024	1	-1.17282	1	-1.14426	1	-1.48221	0.007503	-1.19057	1	733.606	811.719	716.246	662.11	488.329	405.332
E	At2g31070	^ ^TCP10^ TF ^TCP^TEO-type^TCP family transcription factor, putative similar to TCP1 protein (GI:20269127) {Lupinus albus} and cycloidea (GI:12002867) [Lycopersicon esculentum]^	1.15374	1	1.15023	1	3.85135	1.04821e-25	2.1088	2.23788e-15	1.13549	1	414.44	396.948	589.341	2577.2	5098.61	6726.53
A	At2g31150	^ ^chloroplast^ ^expressed protein ^	-1.24131	1	-1.23647	0.00207106	-1.15008	1	1.12032	1	1.16225	1	4845.89	4045.94	3310.86	2949.78	3393.41	3738.02
A	At2g31160	^ ^chloroplast^ ^expressed protein contains Pfam profile PF04852: Protein of unknown function (DUF640)^	-2.27442	2.50852e-15	-1.47174	1	-1.07905	1	-1.27438	1	1.1256	1	10677.1	4997.69	3842.18	3970.58	2442.25	2792.31
A	At2g31390	^STO HOMOLOG^ribose metabolism;sucrose degradation 1;sucrose biosynthesis^FRUCTOKINASE^pfkB-type carbohydrate kinase family protein contains Pfam profile: PF00294 pfkB family carbohydrate kinase^	-1.50884	0.0122405	1.09961	1	-1.02878	1	-1.23529	1	-1.48445	0.52402	17628.9	12082.4	13168.7	13270.2	10473.4	9344.35
B	At2g31610	^ ^ ^ ^40S ribosomal protein S3 (RPS3A) ^	-1.66533	1	1.17864	1	-1.47026	1	1.19866	1	2.5605	1.78609e-07	18095.9	13336.9	16556.8	15252.5	11023.7	12564
B	At2g31730	^ ^ ^ ^ethylene-responsive protein, putative similar to ethylene-inducible ER33 protein [Lycopersicon esculentum] gi|5669656|gb|AAD46413^	1.27157	1	-1.15054	1	-1.05133	1	-1.0893	1	-1.46452	0.00021751	7513.01	10194.8	8606.54	8930.63	8615.52	6383.25
A	At2g31980	^ ^endomembrane system^ ^cysteine proteinase inhibitor-related contains similarity to extracellular insoluble cystatin GI:2204077 from [Daucus carota]^	-2.80958	5.7988e-11	-1.4496	1	1.37612	1	1.71548	0.00178381	-1.20033	1	2096.96	739.343	692.184	1296.25	1518.75	1552.88
B	At2g32060	^ ^ ^ ^40S ribosomal protein S12 (RPS12C) ^	-1.58824	1	-1.14556	1	-1.10253	1	1.18179	1	-2.93318	8.89843e-07	25044.5	18401.4	25481.5	22684.9	18131.5	18450.2
A	At2g32210	^ ^chloroplast^ ^expressed protein ^	-1.23618	1	-1.88059	9.01037e-21	1.2308	1	1.17094	1	-1.28365	1	763.753	744.06	432.381	486.709	635.135	741.056
C	At2g32610	^ATCSLB1^Cellulose-synthase-like genes ;Glycosyltransferase Family 2;Glycosyltransferase Gene Families;Plant Cell Wall Biosynthesis Families;cellulose synthase activity^CSLB;Glycosyltransferase- Family 2;Cellulose Synthase-like; AtCslB^cellulose synthase family protein similar to Zea mays cellulose synthase-3 [gi:9622878], -2 [gi:9622876], -1 [gi:9622874]^	1.33856	0.0171276	1.28663	1	1.1134	1	1.06372	1	-1.04671	1	540.708	601.976	581.819	732.248	644.815	596.657
A	At2g33040	^ ^mitochondrion^ ^ATP synthase gamma chain, mitochondrial (ATPC) identical to SP|Q96250 ATP synthase gamma chain, mitochondrial precursor (EC 3.6.3.14) {Arabidopsis thaliana}; contains Pfam profile: PF00231 ATP synthase^	-1.59315	0.0316548	1.04471	1	1.04657	1	-1.39932	1	1.25546	1	19731.3	15486.5	17325.7	16553.8	14752	18376.5
E	At2g33205	^ ^ ^ ^TMS membrane family protein / tumour differentially expressed (TDE) family protein contains Pfam domain, PF03348: TMS membrane protein/tumour differentially expressed protein (TDE)^	1.29661	1	1.46033	1	1.39999	1	1.37199	1	1.45755	0.0287651	57.6091	70.3727	89.4278	118.913	152.885	225.807
C	At2g33480	^ ^ANAC041^ TF ^NAC^ ^no apical meristem (NAM) family protein contains Pfam PF02365: No apical meristem (NAM) domain;^	-1.52801	0.0127381	1.18464	1	1.2446	1	-1.05018	1	-1.60755	1	3560.46	2709.61	4231.87	5275.11	4514.52	3510.25
C	At2g33530	^ ^endomembrane system^ ^serine carboxypeptidase S10 family protein similar to Serine carboxypeptidase II chains A and B (SP:P08819) (EC 3.4.16.6) [Triticum aestivum (Wheat)^	1.82388	2.77337e-17	1.1672	1	1.0275	1	1.18675	1	-1.08311	1	2014.76	3446.65	4086.21	3799.05	3759.09	3432.97
B	At2g33640	^ ^endomembrane system^ ^zinc finger (DHHC type) family protein contains Pfam profile PF01529: DHHC zinc finger domain^	1.03534	1	-1.09376	1	-1.00336	1	-1.00083	1	-1.34395	0.00307261	1532.92	1573.12	1687.15	1765.91	1478.97	1323.75
E	At2g33800	^ ^structural constituent of ribosome^ ^ribosomal protein S5 family protein contains Pfam profiles PF03719: Ribosomal protein S5, C-terminal domain, PF00333: Ribosomal protein S5, N-terminal domain^	-1.11897	1	1.24143	1	1.09456	1	1.19201	1	1.84843	6.41328e-14	4120.37	3713.98	4216.94	4797.42	5319.81	7875.14
C	At2g34340	^ ^ ^ ^expressed protein contains Pfam profile PF04520: Protein of unknown function, DUF584^	1.8025	6.9696e-05	1.13749	1	1.13522	1	-1.22776	1	-1.0033	1	191.848	371.496	466.184	517.758	414.895	383.819
A	At2g34490	^ ^Cytochrome P450;cytochrome P450 activity^CYP710A^cytochrome P450 family protein similar to Cytochrome P450 61 (C-22 sterol desaturase) (SP:P54781) {Saccharomyces cerevisiae}; contains Pfam profile: PF00067 cytochrome P450; supported by full-length cDNA: Ceres:158108.^	-1.54653	9.17528e-11	1.02557	1	1.3639	1	1.10493	1	1.06653	1	2141.96	1559.93	1646.79	1960.66	1817.05	2063.82
A	At2g34510	^ ^GPI-anchored protein;endomembrane system^Unknown/hypothetical^expressed protein contains Pfam profile PF04862: Protein of unknown function, DUF642^	-1.81425	4.40365e-08	-1.00023	1	1.05676	1	1.33559	1	1.3839	1	2935.92	1742.99	1676.96	1979.74	2176.67	2786.1
E	At2g34810	^ ^endomembrane system^ ^FAD-binding domain-containing protein similar to SP|P30986 reticuline oxidase precursor (Berberine-bridge-forming enzyme) (BBE) (Tetrahydroprotoberberine synthase) [Eschscholzia californica]; contains PF01565 FAD binding domain^	-2.64606	8.97289e-09	1.72809	1	1.38337	0.0329009	2.14363	1.29951e-11	2.33153	1	1990.99	979.834	1411.09	1902.55	3419.93	6175.85
A	At2g34850	^ ^galactose metabolism;UDP-glucose conversion;lactose degradation 4;colanic acid biosynthesis^UDP-GALACTOSE-4-EPIMERASE^NAD-dependent epimerase/dehydratase family protein similar to UDP-galactose 4-epimerase from Cyamopsis tetragonoloba GI:3021357, Lactococcus lactis GI:3703056; contains Pfam profile PF01370 NAD dependent epimerase/dehydratase family^	-1.43143	1	-1.64952	3.9713e-08	-1.28602	1	-1.20364	1	-1.03699	1	2318.05	1910.11	1325.8	1240.42	1207.81	1179.37
A	At2g35290	^ ^ ^ ^expressed protein ^	-1.73426	1.45456e-08	1.07711	1	1.41598	1	1.25954	1	1.02937	1	1461.7	1107.3	900.542	1200.36	1247.75	1397.4
D	At2g35310	^ ^B3 transcription factor family^ ^transcriptional factor B3 family protein contains Pfam profile PF02362: B3 DNA binding domain^	-1.09244	1	1.84493	5.98163e-05	1.18622	1	1.53978	0.0295266	1.10666	1	3616.46	3253.81	3918.74	5418.5	7567.07	7468.15
E	At2g35500	^ ^ ^ ^shikimate kinase-related low similarity to shikimate kinase precursor from Lycopersicon esculentum [SP|Q00497]^	1.00809	1	1.00025	1	-1.01459	1	1.07888	1	1.87995	7.59952e-08	1824.11	2131.78	1833.74	1755.88	1687.57	2705.71
B	At2g35585	^ ^mitochondrion^ ^expressed protein ^	1.15219	1	1.0457	1	-1.41126	1	-1.15537	1	-1.53848	0.0140338	1057.25	1131.77	1084.01	922.348	661.101	508.851
A	At2g35940	^ ^ ^ TF ^HB^HD-BELL^homeodomain-containing protein contains 'Homeobox' domain signature, Prosite:PS00027^	-1.27006	0.106398	-1.48889	0.00184328	-1.24354	1	1.03985	1	1.01368	1	1771.64	1452.96	1160.59	1055.63	875.367	986.82
B	At2g36000	^ ^chloroplast^ ^mitochondrial transcription termination factor-related / mTERF-related contains Pfam profile PF02536: mTERF^	1.12132	1	-1.10274	1	1.06519	1	1.32099	0.00059351	1.08606	1	3775.94	4303.57	3405.65	3408.1	4428.65	4279.04
A	At2g36380	^ ^ABC(ATP-Binding Cassette);ABC Superfamily;ABC transporters;ATP-binding cassette (ABC) transporter activity^PDR subfamily;Putative ABC transporter^ABC transporter family protein related to multi drug resistance proteins and P-glycoproteins^	-1.21577	1	-1.15486	1	-2.69989	4.02944e-08	-1.19374	1	2.26962	0.00415689	793.956	731.777	695.196	301.616	480.098	695.767
E	At2g36430	^ ^molecular_function unknown^ ^expressed protein contains Pfam profile PF03140: Plant protein of unknown function^	1.05379	1	1.11761	1	1.2216	1	2.47906	1.81821e-09	1.86668	0.071091	59.8046	60.5618	67.3222	88.7813	197.877	290.115
A	At2g36610	^ ^ ^ TF ^HB^HD-Zip I^homeobox-leucine zipper family protein similar to homeobox protein PpHB8 (GP:7415628) [Physcomitrella patens]; contains PfamPF00046: Homeobox domain^	-1.39075	1	-1.75926	0.000334656	-1.21585	1	-1.78518	0.000368461	1.11571	1	913.143	746.809	527.708	308.027	165.858	198.088
E	At2g36660	^POLY(A) BINDING PROTEIN 7^Protein synthesis factors;translation initiation factor activity^PABP - poly(A) binding protein^polyadenylate-binding protein, putative / PABP, putative ^	1.06879	1	-1.14137	1	1.12879	1	1.31272	0.000258816	1.18963	1	583.725	630.847	640.502	593.476	770.202	785.139
E	At2g36750	^ ^Glycosyl transferases;Glycosyltransferase Family 1;Glycosyltransferase Gene Families;glycosyltransferase^GT family 1;Glycosyltransferase- Family 1^UDP-glucoronosyl/UDP-glucosyl transferase family protein contains Pfam profile: PF00201 UDP-glucoronosyl and UDP-glucosyl transferase^	-1.31599	1	1.06708	1	-1.17964	1	1.76424	1	2.98581	1.65844e-10	58.7133	57.566	56.2887	62.8688	93.8543	252.984
A	At2g36870	^ ^ Assembly, Architecture, and Growth;Glycoside Hydrolase Family 16;Glycoside Hydrolase Gene Families;endomembrane system ^Growth modifying proteins;Glycoside Hydrolase Family 16^xyloglucan:xyloglucosyl transferase, putative / xyloglucan endotransglycosylase, putative / endo-xyloglucan transferase, putative similar to cellulase (xyloglucan endo-transglycosylase) GI:311835 from [Tropaeolum majus]^	-1.67669	4.5781e-06	1.02732	1	-1.00193	1	-1.238	1	-1.18416	1	5312.77	3179.78	3909.15	3942.76	2771.43	2630.8
D	At2g37210	^ ^ ^ ^expressed protein contains Pfam profile PF03641: decarboxylase family protein^	7.71618	0	2.34744	3.37718e-05	1.17486	1	1.09836	1	-1.20817	1	172.744	1293.52	2834.14	3537.42	3982.45	3351.84
A	At2g37260	^TRANSPARENT TESTA GLABRA 2^AtWRKY44^ TF ^WRKY^ ^WRKY family transcription factor (TTG2) contains Pfam profile: PF03106 WRKY DNA -binding domain^	-2.18573	1.70499e-31	1.04393	1	-1.15207	1	-1.38212	1	1.15952	1	775.732	453.114	487.243	295.391	223.658	280.653
E	At2g37470	^ ^Histone H2B;DNA binding activity^ ^histone H2B, putative strong similarity to histone H2B from Lycopersicon esculentum GI:3021483, GI:3021485, Capsicum annuum SP|O49118; contains Pfam profile PF00125 Core histone H2A/H2B/H3/H4^	1.50518	1	-1.63906	1	-1.05437	1	2.58807	9.39268e-05	-1.36075	1	25399.8	20872.4	25712.4	24086	21655.9	22473.2
C	At2g37640	^ARABIDOPSIS THALIANA EXPANSIN A3^ Assembly, Architecture, and Growth;Expansins;Putative expansin family;molecular_function unknown ^Growth modifying proteins;Alpha-Expansin Gene Family^expansin, putative (EXP3) identical to Alpha-expansin 3 precursor (At-EXP3)[Arabidopsis thaliana] SWISS-PROT:O80932; alpha-expansin gene family, PMID:11641069^	1.80298	0.000171887	-1.33931	0.0809559	-1.57282	1	1.28964	1	-1.35112	1	1214	2006.41	2206.44	1778.08	1831.03	1429.62
C	At2g37880	^ ^chloroplast^ ^expressed protein contains Pfam profile PF04759: Protein of unknown function, DUF617^	1.33385	1	1.3511	1	1.03154	1	1.17943	1	-1.56734	0.00140296	1921.64	2410.19	2904.78	3102.92	2904.14	2168.11
A	At2g37970	^ ^ ^ ^SOUL heme-binding family protein weak similarity to SOUL protein [Mus musculus] GI:4886906; contains Pfam profile PF04832: SOUL heme-binding protein^	-1.72334	4.57864e-12	-1.36468	1	-1.27414	1	-1.17104	1	-1.15629	1	8877.48	6666.57	6148.56	5481.02	5369.43	4254.81
E	At2g38110	^ ^Acyl Lipid Metabolism;metabolism^ER 2-Lysophosphatidate Acyltransferase (LPAAT)^phospholipid/glycerol acyltransferase family protein low similarity to SP|O87707 CicA protein {Caulobacter crescentus}; contains Pfam profile PF01553: Acyltransferase^	-1.11859	1	1.2676	1	1.0482	1	1.15791	1	3.49851	3.71505e-16	453.804	393.737	346.144	388.752	616.78	1893.86
B	At2g38120	^AUXIN RESISTANT 1^auxin;AAAP(Amino Acid/Auxin Permease);Organic Solute Cotransporters;AAAP family;amino acid permease activity^auxin influx carrier;AUX1 family^amino acid permease, putative (AUX1) identical to AUX1 GI:1531758 from [Arabidopsis thaliana]^	1.15823	1	1.06581	1	-1.06666	1	-1.55717	0.00488992	-1.32944	1	15390.8	18648.5	19151.2	16608.1	13781	10884.8
E	At2g38170	^RARE COLD INDUCIBLE4^Nitrate Metabolism;CaCA( Ca2+:Cation Antiporter);Antiporters;vacuolar membrane (sensu Magnoliophyta)^NO3resp-CAX1;Low affinity calcium antiporter CAX2 family^calcium exchanger (CAX1) identical to high affinity calcium antiporter CAX1 [Arabidopsis thaliana] gi|9256741|gb|AAB05913, except a possible frameshift at base 58008. Sequence has been confirmed with 5 sequencing reads.…	-1.32313	1	-1.14021	1	-1.04312	1	1.57152	2.18603e-06	1.63038	0.000181677	4441.33	3725.85	2629.2	3025.26	4320.03	6608.94
A	At2g38310	^ ^chloroplast^ ^expressed protein low similarity to early flowering protein 1 [Asparagus officinalis] GI:1572683, SP|P80889 Ribonuclease 1 (EC 3.1.-.-) {Panax ginseng}^	-3.19285	9.76393e-05	-1.74836	1	1.08239	1	-1.13043	1	-1.46353	1	21911.5	12179.2	6455.71	9271.99	8571.86	8272.12
B	At2g38340	^ ^ ^ TF ^AP2/ERF^ERF-EREBP^AP2 domain-containing transcription factor, putative (DRE2B) Similar to DREB2A (GP:3738230) and DREB2B (GP:3738232) [Arabidopsis thaliana]; DRE binding proteins may be involved in dehydration or low temp response^	1.26147	1	-1.38226	1	1.11766	1	-1.54177	1	-1.72091	1.13004e-11	628.489	726.409	589.026	440.403	294.531	181.254
B	At2g38430	^ ^ ^ ^expressed protein ^	1.26711	0.0144095	-1.07603	1	-1.02707	1	-1.03323	1	-1.16972	1	916.308	1184.01	1042.36	955.699	952.177	868.94
D	At2g38620	^Cyclin-dependent kinase B1;2^CDC2 Kinase ;Core Cell Cycle Genes;protein kinase activity^ ^cell divsion control protein, putative similar to SWISS-PROT:P25859 cell division control protein 2 homolog B [Arabidopsis thaliana]; contains protein kinase domain, Pfam:PF00069^	-1.01341	1	1.22625	1	1.04715	1	1.11717	1	1.55448	2.82797e-08	803.081	1143.52	1357.49	1461.35	1344.31	2077.13
A	At2g38640	^ ^ ^ ^expressed protein contains Pfam profile PF04525: Protein of unknown function (DUF567)^	-2.38144	2.6421e-05	-1.16566	1	1.0686	1	-1.43852	1	-1.27616	1	295.971	152.979	127.743	116.478	100.469	81.8337
D	At2g38740	^ ^metabolism^ ^haloacid dehalogenase-like hydrolase family protein similar to SP|P71447 Beta-phosphoglucomutase (EC 5.4.2.6) {Lactococcus lactis}; contains InterPro accession IPR005834: Haloacid dehalogenase-like hydrolase^	-1.01188	1	1.29931	0.000764582	1.08727	1	-1.03582	1	-1.05666	1	6357.34	6625.21	8487.52	10367.1	10854.8	9536.05
D	At2g38860	^ ^endomembrane system^ ^proteaseI (pfpI)-like protein (YLS5) contains Pfam profile PF01965: DJ-1/PfpI family; supporting cDNA gi|13122287|dbj|AB047808.1|; identical to proteaseI (pfpI)-like protein [Arabidopsis thaliana] GI:13122288, cDNA proteaseI (pfpI)-like protein GI:13122287^	-1.78423	1.78938e-05	1.77386	1	1.20006	1	-1.0696	1	1.13043	1	1619.51	1204.45	2108.7	2867.77	2685.4	2398.83
B	At2g38870	^ ^serine protease inhibitor activity^ ^protease inhibitor, putative similar to SP|P24076 Glu S.griseus protease inhibitor (BGIA) {Momordica charantia}; contains Pfam profile PF00280: Potato inhibitor I family^	1.37335	1	-1.47348	0.000197673	-1.05575	1	-1.00223	1	1.19708	1	5211.56	6356.51	4949.47	4551.54	4324.57	4887.36
C	At2g38940	^PHOSPHATE TRANSPORTER 2^MFS(Major Facilitator);Inorganic Solute Cotransporters;membrane fraction^Inorganic phosphate transporter family^phosphate transporter (PT2) identical to phosphate transporter (AtPT2) [Arabidopsis thaliana] GI:1502430^	-1.91408	1	2.48785	0.000294838	-1.12014	1	-1.18051	1	-1.0972	1	9752.05	6322.19	13858.6	12138.7	11877.8	8298.98
E	At2g38995	^ ^Acyl Lipid Metabolism^Bifunctional Wax Ester Synthase / DAGAT^expressed protein ^	-1.52454	0.0154027	1.05559	1	-1.31128	1	1.10588	1	3.6477	0.000172925	849.582	581.805	546.781	319.227	480.739	1358.4
D	At2g39010	^PIP2;6^MIP(The Major Intrinsic Protein);Aquaporin Families;MIP family;water channel activity^Delta tonoplast integral protein family^aquaporin, putative similar to plasma membrane aquaporin 2b GI:7209560 from [Raphanus sativus]^	4.23827	8.51858e-24	2.17465	4.21591e-10	1.54803	1	1.42557	1	-1.38658	1	1624.61	6857.92	10801.5	12055.6	15396.4	13979.6
B	At2g39220	^ ^Acyl Lipid Metabolism^Patatin-like Acyl-Hydrolase^patatin family protein similar to patatin-like latex allergen [Hevea brasiliensis][PMID:10589016]; contains patatin domain PF01734^	-1.19452	1	-1.12631	1	-1.39335	3.70616e-06	-1.09343	1	1.1119	1	3252.18	2952.98	2664.15	1877.18	1550.59	1676.1
B	At2g39280	^ ^ ^ ^RabGAP/TBC domain-containing protein contains Pfam profile PF00566: TBC domain^	-1.01248	1	1.13125	1	-1.39836	1	-1.25773	1	1.63966	5.84051e-08	1816.82	1930.3	1933.87	1416.38	1345.94	1590.3
D	At2g39290	^PHOSPHATIDYLGLYCEROLPHOSPHATE SYNTHASE^Acyl Lipid Metabolism;Lipid Metabolism Gene Families;chloroplast;phospholipid biosynthesis II^Plastidial Phosphatidylglycerol-Phosphate Synthase;Phosphatidylglycerophosphate synthase-like protein family^phosphatidylglycerolphosphate synthase (PGS1) identical to phosphatidylglycerolphosphate synthase GI:13365519 from [Arabidopsis thaliana]^	1.15979	1	1.35394	0.00870896	1.25143	1	1.14803	1	-1.32832	1	8190.16	7764.98	7966.77	10337.4	12405.1	11081
B	At2g39350	^ ^ABC(ATP-Binding Cassette);ABC Superfamily;ABC transporters;ATP-binding cassette (ABC) transporter activity^WBC subfamily;Putative ABC transporter^ABC transporter family protein ^	-1.05551	1	-1.59505	6.24055e-09	1.01965	1	-1.02354	1	1.0898	1	398.253	489.54	284.144	235.573	231.547	259.698
A	At2g39510	^ ^DMT(The Drug/Metabolite Transporter);Nodulin-like protein family;endomembrane system^ ^nodulin MtN21 family protein similar to MtN21 GI:2598575 (root nodule development) from [Medicago truncatula]^	-1.41269	0.0254915	-1.37984	1	1.07763	1	-1.11642	1	-1.09735	1	1217.19	1047.72	756.806	617.882	572.447	558.677
A	At2g39570	^ ^enzyme activity^ ^ACT domain-containing protein contains Pfam ACT domain PF01842^	-1.66979	1.22503e-12	1.42035	1	1.2952	1	1.01733	1	-1.09619	1	11416.5	6803.32	7213.29	8356.1	9330.25	8061.88
A	At2g39660	^ ^chloroplast^ ^protein kinase, putative similar to protein kinase gi|166809|gb|AAA18853^	-1.71969	1.68678e-06	-1.32206	1	-1.32142	1	-1.03369	1	1.20863	1	2956.36	1897.26	1657.94	1245.48	1164.86	1153.36
E	At2g39730	^RUBISCO ACTIVASE^enzyme regulator activity^ ^ribulose bisphosphate carboxylase/oxygenase activase / RuBisCO activase identical to SWISS-PROT:P10896 ribulose bisphosphate carboxylase/oxygenase activase, chloroplast precursor (RuBisCO activase, RA)[Arabidopsis thaliana]^	1.08713	1	1.07173	1	1.07792	1	1.08543	1	1.48832	0.00217068	10182.3	9794.6	10986.7	10655.7	10013.4	13773.1
A	At2g40130	^ ^chloroplast^ ^heat shock protein-related contains similarity to 101 kDa heat shock protein; HSP101 [Triticum aestivum] gi|11561808|gb|AAC83689^	-1.57607	0.000126638	-1.11184	1	-1.17393	1	1.11869	1	1.05079	1	7584.86	4916.94	3686.34	3391.69	4125.42	4082.17
B	At2g40205	^ ^ ^ ^60S ribosomal protein L41 (RPL41C) ^	-3.83138	0.00078963	-1.62686	1	1.00826	1	1.77156	1	-1.77352	1	16028.9	13054	15580	12587.6	11163.4	10028.1
A	At2g40230	^ ^ ^ ^transferase family protein similar to taxadienol acetyl transferase from Taxus cuspidata [gi:6978038]; contains Pfam transferase family domain PF002458^	-1.4051	0.013679	-1.29338	1	1.05418	1	-1.15377	1	1.3729	1	1319.56	1058.02	1021.17	1159.25	976.956	1164.09
D	At2g40250	^ ^endomembrane system^ ^GDSL-motif lipase/hydrolase family protein similar to family II lipases EXL3 GI:15054386, EXL1 GI:15054382, EXL2 GI:15054384 from [Arabidopsis thaliana]; contains Pfam profile PF00657: GDSL-like Lipase/Acylhydrolase^	1.20967	1	1.74011	1	2.42104	9.09856e-08	1.79941	0.00694925	1.3061	1	77.311	96.3775	171.208	352.243	537.456	734.032
D	At2g40475	^ ^ ^ ^expressed protein ^	1.76808	1.87715e-06	1.41926	0.0820076	1.55119	0.000399285	1.58019	1	1.24375	1	172.658	252.303	332.475	477.655	706.026	829.363
E	At2g40670	^RESPONSE REGULATOR 16^ARR-A class transcription factor family;Cytokinin;Response Regulator;two-component response regulator activity^Response Regulator: A- Type^two-component responsive regulator / response regulator 16 (ARR16) identical to response regulator 16 GI:11870067 from [Arabidopsis thaliana]^	1.31037	1	1.29707	1	-1.12536	1	4.24751	0.000173208	-1.14804	1	91.8961	134.8	187.777	159.047	595.045	800.784
A	At2g40970	^ ^ ^ TF ^GARP^ ^myb family transcription factor contains Pfam profile: PF00249 myb-like DNA-binding domain^	-1.31213	1	-1.19079	1	-1.13804	1	-1.49107	8.12032e-05	-1.33444	1	1827.82	1544.92	1276.05	953.884	589.065	530.559
A	At2g41070	^ENHANCED EM LEVEL^AtbZIP12^ TF ^bZIP^ ^basic leucine zipper transcription factor (BZIP12) nearly identical to basic leucine zipper transcription factor [Arabidopsis thaliana] GI:21694632; contains a bZIP transcription factor basic domain signature (PDOC00036)^	-1.40748	0.00158601	-1.66054	0.0285368	-1.0597	1	-1.29147	1	-1.00161	1	4613.48	3646.84	2342.98	1829.32	1676.1	1686.78
A	At2g41100	^CALMODULIN-LIKE 5^EF-hand containing proteins:Group IV;calcium ion binding activity^ ^touch-responsive protein / calmodulin-related protein 3, touch-induced (TCH3) identical to calmodulin-related protein 3, touch-induced SP:P25071 from [Arabidopsis thaliana]^	-1.7939	1	-2.53598	0.0254021	-1.37015	1	-1.81477	0.52438	1.47307	1	3758.58	2503.07	1328.23	1186.16	650.516	883.232
D	At2g41290	^ ^endomembrane system^ ^strictosidine synthase family protein similar to strictosidine synthase [Rauvolfia serpentina][SP|P15324]; contains strictosidine synthase domain PF03088^	1.73235	0.00341549	2.17667	3.8715e-12	-1.18054	1	-1.25906	1	1.52357	1	196.91	353.762	563.349	542.706	644.949	920.063
D	At2g41510	^ ^mitochondrion^ ^FAD-binding domain-containing protein / cytokinin oxidase family protein similar to cytokinin oxidase, Zea mays [gi:3882018] [gi:3441978]^	1.77895	1	1.24059	1	2.37208	1.2182e-11	1.84077	0.78531	1.14392	1	120.419	179.006	199.187	568.658	1134.96	1133.76
B	At2g41790	^ ^cysteine-type endopeptidase activity^ ^peptidase M16 family protein / insulinase family protein contains Pfam domain, PF05193: Peptidase M16 inactive domain; similar to insulin-degrading enzyme (Insulysin, Insulinase, Insulin protease) [Mouse] SWISS-PROT:Q9JHR7^	-1.29131	1	1.10294	1	-1.61694	1	-1.3792	1	1.55615	0.0345512	1547.57	1385.09	1456.62	742.155	882.172	1271.43
D	At2g41950	^ ^chloroplast^ ^expressed protein ^	1.53006	1	1.14376	1	1.04312	1	1.49935	1	-1.56994	0.011237	3730.12	4485.84	3806.3	4967.53	5614.28	4658.16
A	At2g41990	^ ^ ^ ^expressed protein ^	-1.62192	4.78962e-06	1.13862	1	1.40763	7.00448e-05	-1.02496	1	-1.06001	1	870.775	609.386	645.01	829.815	605.869	709.265
B	At2g42100	^ ^Actin family;motor activity^ ^actin, putative very strong similarity to SP|P53496 Actin 11 {Arabidopsis thaliana}, SP|P53493 Actin 3 {Arabidopsis thaliana}; contains Pfam profile PF00022: Actin^	-1.3782	1	1.09292	1	-1.21059	1	-1.3167	1	2.16086	2.27901e-37	1205.62	1178.41	1509.9	1182.87	946.654	988.364
B	At2g42150	^ ^Bromodomain proteins;DNA binding activity^ ^DNA-binding bromodomain-containing protein contains Pfam domains, PF00439: Bromodomain and PF00249: Myb-like DNA-binding domain^	-1.09579	1	1.01253	1	-1.20944	1	-1.46002	2.32393e-07	-1.31481	1	1690.25	1935.73	1664.46	1345.89	1048.81	861.951
A	At2g42200	^ ^SPL9^ TF ^SBP (Zn)^ ^squamosa promoter-binding protein-like 9 (SPL9) identical to squamosa promoter binding protein-like 9 [Arabidopsis thaliana] GI:5931673; contains Pfam profile PF03110: SBP domain^	-1.97229	3.339e-26	1.35901	1	1.16957	1	1.07752	1	1.26235	1	10249.1	5353.66	5883.98	6526.33	6888.78	8163.85
C	At2g42280	^ ^BHLH130^ TF ^bHLH^bHLH^basic helix-loop-helix (bHLH) family protein ^	1.63527	0.00611462	1.48484	1	1.19758	1	1.12086	1	-1.29216	1	392.525	620.316	753.281	775.727	776.257	599.588
D	At2g42410	^ ^ ^ TF ^C2H2 (Zn)^ ^zinc finger (C2H2 type) family protein contains Pfam profile: PF00096 zinc finger, C2H2 type^	1.7646	1.3564e-08	1.62409	0.00199423	1.37352	1	1.45939	1	1.22682	1	294.463	498.345	617.001	846.013	1119.78	978.58
D	At2g42570	^ ^endomembrane system^ ^expressed protein ^	-1.19406	1	1.60157	8.91112e-10	2.04458	0.26471	1.19123	1	-1.1775	1	7118.29	6280.46	6478	11092.2	15277	14896.5
A	At2g42820	^ ^mitochondrion^ ^abscisic acid-responsive HVA22 family protein contains Pfam profile PF03134: TB2/DP1, HVA22 family^	-1.53148	0.0256999	-1.96859	5.35705e-08	-1.47255	1	-1.28774	1	-1.19949	1	1358.29	1158.52	961.048	999.374	931.165	671.643
E	At2g42830	^SHATTERPROOF2^AGL5^ TF ^MADS^Type II (MIKCc)^agamous-like MADS box protein AGL5 / floral homeodomain transcription factor (AGL5) identical to SP|P29385 Agamous-like MADS box protein AGL5 {Arabidopsis thaliana}^	1.50917	1	-1.15626	1	-1.21501	1	2.93716	0.163474	3.01282	8.55712e-25	56.4957	74.1128	64.7631	58.1088	193.903	631.798
D	At2g42885	^ ^ ^ ^expressed protein ^	7.12779	0	2.40996	0.00791573	-1.1448	1	1.19285	1	-1.33747	1	2800.29	13237.4	18889.7	16105.9	20090.6	15833.3
E	At2g42960	^ ^RLCK V ;protein kinase activity^ ^protein kinase family protein contains protein kinase domain, Pfam:PF00069^	1.51627	0.0277402	-1.12061	1	-1.00444	1	1.96228	1.453e-05	1.07013	1	1849.78	2947.27	2621.62	2971.47	5193.84	5514.71
E	At2g42990	^ ^enzyme activity^ ^GDSL-motif lipase/hydrolase family protein similar to family II lipase EXL3 (GI:15054386), EXL1 (GI:15054382), EXL2 (GI:15054384) [Arabidopsis thaliana]; contains Pfam profile PF00657: Lipase/Acylhydrolase with GDSL-like motif^	1.06447	1	1.7326	0.0303807	1.67005	1	1.65712	1	4.5822	0	161.7	163.007	243.214	325.562	852.863	3604.09
B	At2g43490	^ ^ ^ ^RabGAP/TBC domain-containing protein similar to GTPase activating protein [Yarrowia lipolytica] GI:2370595; contains Pfam profile PF00566: TBC domain^	1.04255	1	-1.08648	1	-1.48231	1	-1.21666	1	1.98657	3.09987e-14	834.378	1014.33	1164.47	902.198	775.19	848.808
E	At2g43510	^TRYPSIN INHIBITOR^endomembrane system^ ^trypsin inhibitor, putative similar to SP|P26780 Trypsin inhibitor 2 precursor (MTI-2) {Sinapis alba}^	-1.82955	1.43054e-10	-1.51342	0.00479559	1.92249	1	3.37339	3.95678e-29	1.43409	1	1606.89	951.859	768.565	1295.5	3526.7	4381.95
A	At2g43520	^ ^endomembrane system^ ^trypsin inhibitor, putative similar to SP|P26780 Trypsin inhibitor 2 precursor (MTI-2) {Sinapis alba}^	-2.04609	0.25998	-2.00843	0.00226438	1.10965	1	1.31204	1	1.26014	1	16611.3	8690.08	5420.4	5112.89	5654.97	7332.17
E	At2g43620	^ ^Carbohydrate-Binding Module Family 18;Glycoside Hydrolase Gene Families;endomembrane system^Glycoside Hydrolase Family 19^chitinase, putative similar to basic endochitinase CHB4 precursor SP:Q06209 from [Brassica napus]^	-2.27696	4.01493e-05	-1.38679	1	1.23661	1	-1.05496	1	2.27644	0.000175044	626.466	325.936	272.911	317.122	356.222	721.469
B	At2g43670	^ ^endomembrane system^ ^glycosyl hydrolase family protein 17 similar to glucan endo-1,3-beta-glucosidase precursor SP:P52409 from [Triticum aestivum]; C terminal homology only^	1.29886	1	-1.86658	3.72918e-07	-1.18656	1	-1.39032	1	-1.15094	1	616.137	774.407	534.901	337.334	226.548	200.416
C	At2g43840	^ ^Glycosyl transferases;Glycosyltransferase Family 1;Glycosyltransferase Gene Families;glycosyltransferase^GT family 1;Glycosyltransferase- Family 1^UDP-glucoronosyl/UDP-glucosyl transferase family protein contains Pfam profile: PF00201 UDP-glucoronosyl and UDP-glucosyl transferase^	1.56337	0.000492577	-1.21551	1	1.0098	1	-1.10382	1	-1.02429	1	742.107	1139.45	1033.62	1160.4	1021.61	1111.7
B	At2g44070	^ ^Protein synthesis factors;translation initiation factor activity^eIF2Bdelta - eukaryotic initiation factor 2Bdelta^eukaryotic translation initiation factor 2B family protein / eIF-2B family protein similar to SP|Q63186 Translation initiation factor eIF-2B delta subunit (eIF-2B GDP-GTP exchange factor) {Rattus norvegicus}; contains Pfam profile PF01008: Initiation factor 2 subunit family^	-1.05283	1	1.12328	1	-1.3709	1	-1.0837	1	1.73287	0.00222625	1049.19	976.261	979.941	671.922	697.733	713.429
A	At2g44080	^ ^ ^ ^expressed protein ^	-1.97133	6.34545e-09	-1.8166	1.31784e-19	1.50411	1	-1.28393	1	1.50896	1	3453.89	1799.86	1335.99	1852.87	1468.06	1767.38
B	At2g44170	AT2G44170_1 putative N-myristoyltransferase supported by cDNA gi_13924515_gb_AF250957_1_AF250957	1.1449	1	1.07492	1	-1.01627	1	-1.06723	1	-1.48222	0.0369208	1055.62	1294.83	1143.28	983.662	1037.85	932.16
D	At2g44450	^ ^glucosidase;Glycoside Hydrolase Family 1;Glycoside Hydrolase Gene Families;endomembrane system^Glycoside Hydrolase Family 1^glycosyl hydrolase family 1 protein contains Pfam PF00232 : Glycosyl hydrolase family 1 domain; TIGRFAM TIGR01233: 6-phospho-beta-galactosidase; similar to amygdalin hydrolase isoform AH I precursor (GI:16757966) [Prunus serotina]^	1.50763	0.00860278	1.76247	1	1.26494	1	1.32512	2.20946e-05	1.14164	1	475.993	763.236	1171.3	1170.01	1536.29	1621.36
E	At2g44740	^ ^nucleus^ ^cyclin family protein similar to cyclin 2 [Trypanosoma brucei] GI:7339572, cyclin 6 [Trypanosoma cruzi] GI:12005317; contains Pfam profile PF00134: Cyclin, N-terminal domain^	-1.11288	1	-1.604	1	1.72754	1	2.18914	3.20556e-17	1.14193	1	312.368	317.488	227.863	461.435	1012.73	1277.11
A	At2g44940	^ ^ ^ TF ^AP2/ERF^ERF-EREBP^AP2 domain-containing transcription factor TINY, putative similar to transcription factor TINY (GI:1246403) [Arabidopsis thaliana]; contains pFAM domain (PF00847)^	-1.30624	1	-1.59165	0.00038245	1.01861	1	-1.06798	1	1.54085	1	1973.24	1666.46	1180.58	978.87	947.349	1412.21
B	At2g44960	AT2G44960_1 hypothetical protein similar to hypothetical protein GB AAC31828	-1.31933	1	1.72078	1	-2.83365	2.62687e-15	-1.39183	1	1.43467	1	882.854	863.431	1180.21	735.571	891.805	1064.18
A	At2g45080	^ ^nucleus^ ^cyclin family protein similar to cyclin 2 [Trypanosoma brucei] GI:7339572, cyclin 6 [Trypanosoma cruzi] GI:12005317; contains Pfam profile PF00134: Cyclin, N-terminal domain^	-2.23162	4.3126e-12	-1.37813	1	1.26682	1	1.19159	1	1.1669	1	602.465	290.585	192.671	240.44	337.237	342.913
D	At2g45180	^ ^endomembrane system^ ^protease inhibitor/seed storage/lipid transfer protein (LTP) family protein similar to 14 kDa polypeptide [Catharanthus roseus] GI:407410; contains Pfam protease inhibitor/seed storage/LTP family domain PF00234^	-2.08407	0.000518859	3.10634	5.23124e-11	2.26793	8.30887e-05	1.19784	1	1.36254	1	1563.99	938.04	1955.47	4153.48	6584.81	8137.38
D	At2g45190	^FILAMENTOUS FLOWER^ ^ TF ^YABBY^ ^axial regulator YABBY1 (YABBY1) / abnormal floral organs protein (AFO) / filamentous flower protein (FIL) identical to YABBY1 [Arabidopsis thaliana] GI:4928749, abnormal floral organs protein (AFO) [Arabidopsis thaliana] GI:4322477; supporting cDNA gi|4322476|gb|AF087015.1|AF087015^	1.11318	1	2.24594	9.85009e-12	1.51684	1	-1.12165	1	-1.03572	1	13821.2	12874	18378.7	22532.3	19136.4	16376.4
A	At2g45340	^ ^LRR IV ;endomembrane system^ ^leucine-rich repeat transmembrane protein kinase, putative ^	-2.01037	4.34656e-17	-1.22161	1	1.04713	1	-1.09793	1	1.46373	1	6174.74	3089.62	2733.55	2984.03	3013.84	4045.75
A	At2g45410	^ ^ASL23/LBD19^ TF ^AS2/LOB^Class I^LOB domain protein 19 / lateral organ boundaries domain protein 19 (LBD19) identical to SP|O22132 LOB domain protein 19 {Arabidopsis thaliana}^	-1.59932	0.00511914	-2.94592	8.25592e-07	-1.09523	1	-1.6204	2.78786e-05	-1.1085	1	6057.56	4028.11	1972.56	1834.02	805.588	638.886
A	At2g45420	^ ^ASL20/LBD18^ TF ^AS2/LOB^Class I^LOB domain protein 18 / lateral organ boundaries domain protein 18 (LBD18) identical to LOB DOMAIN 18 [Arabidopsis thaliana] GI:17227164; supported by full-length cDNA gi:17227163^	-1.48589	1	-2.2686	3.9127e-06	-1.34241	1	-1.36856	1	-1.0619	1	1529.57	944.887	454.73	367.469	221.398	243.443
A	At2g45660	^SUPPRESSOR OF OVEREXPRESSION OF CO 1^AGL20^ TF ^MADS^Type II (MIKCc)^MADS-box protein (AGL20) ^	-3.06028	1.50673e-27	-1.14939	1	1.15561	1	-1.45925	9.00791e-06	1.27196	1	18194.1	7400.16	7686.66	9956.95	7425.76	7519.88
C	At2g45770	^ CHLOROPLAST SRP RECEPTOR HOMOLOG, ALPHA SUBUNIT CPFTSY ^thylakoid (sensu Viridiplantae)^ ^signal recognition particle receptor protein, chloroplast (FTSY) similar to Cell division protein ftsY homolog (SP:O67066) {Aquifex aeolicus}; contains Pfam PF00448: SRP54-type protein, GTPase domain contains TIGRFAM TIGR00064: signal recognition particle-docking protein FtsY contains Pfam PF02881: SRP54-t…	1.22258	1	-1.0457	1	1.05846	1	1.01342	1	1.42436	0.0169874	1470.23	1773.22	1764.34	2014.08	1922.46	2057.96
A	At2g45870	^ ^chloroplast^ ^expressed protein contains Pfam profile PF05249: Uncharacterised protein family (UPF0187)^	-1.36799	1	1.25146	1	1.59448	0.00890229	-1.10168	1	1.19438	1	2587.18	1992.83	2215.27	2477.14	1938.27	2218.09
E	At2g45890	^ ^chloroplast^ ^expressed protein contains Pfam profile PF03759: Domain of unknown function (DUF315)^	-1.0191	1	-1.0256	1	1.14061	1	2.61248	1	2.98377	0.00280836	49.7029	58.1086	54.1455	49.705	119.373	282.33
B	At2g45920	^ ^Plant U-box protein (PUB) Class V;mitochondrion^ ^U-box domain-containing protein contains Pfam profile PF04564: U-box domain^	1.22619	1	-1.59406	0.0194892	1.03733	1	1.26408	1	-1.22011	1	1169.29	1194.36	972.192	1176.15	1290.27	905.618
B	At2g46010	AT2G46010_1 hypothetical protein predicted by genscan and genefinder	1.20343	1	1.05332	1	-2.5572	0.0238374	1.36779	1	1.53715	1	110.59	176.578	248.922	120.247	204.11	158.34
A	At2g46330	^ARABINOGALACTAN PROTEIN 16^GPI-anchored protein;Structural proteins;endomembrane system^AG peptides;Arabinogalactan-proteins (AGPs)^arabinogalactan-protein (AGP16) identical to gi|10880509|gb|AAG24284^	-1.23738	1	1.33458	1	1.45294	3.43656e-05	1.16994	1	-1.21385	1	12276.2	9720.83	9387.17	11634.1	11991.6	9533.45
A	At2g46410	^CAPRICE^ ^ TF ^MYB-related^ ^myb-related protein CAPRICE (CPC) identical to myb-related protein CAPRICE (CPC) GI:2346965 from [Arabidopsis thaliana]^	-1.83898	1	-1.43456	1	-1.25511	1	-1.45875	0.000236311	-1.27459	1	1337.09	827.372	899.49	739.125	455.525	329.19
A	At2g46430	^CYCLIC NUCLEOTIDE GATED CHANNEL 3^VIC(Voltage Gated Ion Channel);Ion Channel Families;CNGCs;membrane^Cyclic nucleotide gated channel family^cyclic nucleotide-regulated ion channel / cyclic nucleotide-gated channel (CNGC3) identical to cyclic nucleotide and calmodulin-regulated ion channel GI:4581201 from [Arabidopsis thaliana]^	-1.0974	1	-1.39389	0.000292193	1.21282	1	1.31722	1	1.19036	1	1636.79	1226.57	979.414	1122.17	1297.66	1428.38
A	At2g46630	AT2G46630_1 putative extensin	-1.60234	2.12039e-08	-1.18211	1	-1.05779	1	-1.43175	1	1.00332	1	1234.03	747.373	706.87	859.853	593.933	493.785
D	At2g46650	^ ^Cytochrome b5^Cytochromes b5^cytochrome b5, putative similar to cytochome b5 GI:2695711 from [Olea europaea]^	-2.461	9.42616e-24	2.23508	0	-1.08181	1	1.44015	0.26246	1.13891	1	1569.64	873.211	2079.44	1929.46	2219.37	2636.84
A	At2g46680	^ ^ATHB-7^ TF ^HB^HD-Zip I^homeobox-leucine zipper protein 7 (HB-7) / HD-ZIP transcription factor 7 identical to homeobox-leucine zipper protein ATHB-7 (HD-ZIP protein ATHB-7) (SP:P46897) [Arabidopsis thaliana];^	-1.03029	1	-1.51662	1	-1.68244	0.000896521	-1.14993	1	1.16221	1	2801.12	2724.39	1961.85	1837.33	2102.29	2815.01
B	At2g46690	^ ^SAUR^ ^auxin-responsive family protein similar to indole-3-acetic acid induced protein ARG7 (SP:P32295) [Phaseolus aureus]^	-1.19105	1	-1.73301	0.0183793	-1.16689	1	-1.21557	1	-1.46843	1	617.046	628.992	458.39	318.412	225.942	266.882
E	At2g46720	^HIGH CARBON DIOXIDE^Acyl Lipid Metabolism;Strong similarity to beta-keto-Coa synthase family;endomembrane system^Ketoacyl-CoA Synthase^fatty acid elongase 3-ketoacyl-CoA synthase, putative similar to GI:4091810; contains Pfam profile PF02797: Chalcone and stilbene synthases, C-terminal domain^	2.4055	7.70734e-05	1.36084	1	-1.02419	1	1.72434	2.9783e-06	2.42311	0.00125198	259.921	642.364	1014	875.614	1151.69	2042.35
B	At2g46900	^ ^ ^ ^expressed protein contains Pfam profile PF04910: Protein of unknown function, DUF654^	-1.14624	1	-1.42971	0.0398715	-1.10161	1	-1.07622	1	1.07328	1	8749.42	8434.74	6860.15	6676.52	7231.93	7149.59
D	At2g46950	^ ^Cytochrome P450;cytochrome P450 activity^CYP709B^cytochrome P450 family protein similar to cytochrome P450 72A1 (SP:Q05047) [Catharanthus roseus]; contains Pfam profile: PF00067: Cytochrome P450^	1.89843	0.18095	3.5721	0	1.31486	1	-1.24605	1	-1.33188	1	176.492	438.763	1251.97	1918.41	1503.3	1421.68
B	At2g47020	^ ^translation release factor activity^ ^peptide chain release factor, putative similar to peptide chain release factor 1 [Escherichia coli] GI:147567; contains Pfam profiles PF00472: Peptidyl-tRNA hydrolase domain, PF03462: PCRF domain^	-1.11641	1	1.01417	1	-1.18201	1	-1.41968	1	1.69954	0.000353128	1525.74	1514.66	1259.37	1063.4	1027.44	1135.2
E	At2g47510	^FUMARASE 1^ anaerobic respiration;TCA cycle, aerobic respiration;glutamate degradation VII;tyrosine degradation 1 ^FUMARASE^fumarate hydratase, putative / fumarase, putative similar to SP|P55250 Fumarate hydratase, mitochondrial precursor (EC 4.2.1.2) (Fumarase) {Rhizopus oryzae}; contains Pfam profile PF00206: Lyase^	-1.32132	0.00800076	1.3333	1	-1.39406	1	-1.32309	1	1.12944	1	2782.76	2547.49	2735.93	2410.55	2682.17	3339.29
B	At2g47760	^ ^Glycosyltransferase Family 58;Not56-like protei;mitochondrion^ ^ALG3 family protein contains Pfam profile: PF05208 ALG3 protein^	1.05118	1	1.05516	1	1.02134	1	1.14446	1	-1.38091	0.00021141	4833.35	5148.18	4398.22	4440.59	4410.37	3782.15
E	At2g47930	^ ^GPI-anchored protein;chloroplast^Classical AGPs^hydroxyproline-rich glycoprotein family protein contains proline-rich extensin domains, INTERPRO:IPR002965^	-1.50529	1	-1.01127	1	1.44109	0.00257618	1.16979	1	1.08422	1	2827.42	1472.57	1308.2	1899.81	2144.62	3005.98
B	At2g47940	^ ^chloroplast stromal thylakoid^ ^DegP2 protease (DEGP2) identical to DegP2 protease GI:13172275 from [Arabidopsis thaliana]; identical to cDNA DegP2 protease (DEGP2) nuclear gene for chloroplast product GI:13172274^	1.17577	1	1.0584	1	-1.36174	1	-1.14103	1	1.88152	0.00141617	4593.64	5004.71	5212.53	4067.18	4298.19	5704.57
A	At2g48020	^ ^SUGAR TRANSPORTERS;MFS(Major Facilitator);Organic Solute Cotransporters;carbohydrate transporter activity^MONOSACCHARIDE-H+ SYMPORTERS;Putative sugar transporter family^sugar transporter, putative similar to ERD6 protein {Arabidopsis thaliana} GI:3123712, sugar-porter family proteins 1 and 2 [Arabidopsis thaliana] GI:14585699, GI:14585701; contains Pfam profile PF00083: major facilitator super…	-1.7448	6.07292e-05	-1.18515	1	1.1425	1	-1.02029	1	1.00178	1	836.199	576.375	454.569	526.387	523.314	464.994
D	At3g01490	^ ^GmPK6/AtMRK1-like Protein Kinase ;MAPKKK;protein kinase activity^Raf subfamily^protein kinase, putative similar to ATMRK1 [Arabidopsis thaliana] gi|2351097|dbj|BAA22079^	2.30653	1	1.98442	1.04029e-05	1.18145	1	-1.26061	1	-1.15971	1	113.664	247.534	417.077	598.946	539.31	480.772
E	At3g01500	^CARBONIC ANHYDRASE 1^cyanate metabolism;cyanate catabolism^CARBONIC ANHYDRASE^carbonic anhydrase 1, chloroplast / carbonate dehydratase 1 (CA1) nearly identical to SP|P27140 Carbonic anhydrase, chloroplast precursor (EC 4.2.1.1) (Carbonate dehydratase) {Arabidopsis thaliana}^	-1.0315	1	1.00014	1	1.03774	1	1.43351	1	2.09952	8.38436e-06	439.425	442.423	455.922	460.497	583.74	1231.54
A	At3g01680	^ ^ ^ ^expressed protein ^	-1.54626	0.0252046	-1.31415	1	-1.1355	1	-1.37139	1	-1.60996	0.0029671	2566.91	1909.62	1754.02	1440.79	983.828	895.011
E	At3g01860	^ ^ ^ ^expressed protein ^	-1.18206	1	1.07561	1	1.60478	1	1.5282	7.10353e-07	1.43046	1	492.813	421.855	480.79	643.722	969.597	1356.23
C	At3g02040	^SENESCENCE-RELATED GENE 3^chloroplast^ ^glycerophosphoryl diester phosphodiesterase family protein contains Pfam profile PF03009: Glycerophosphoryl diester phosphodiesterase family^	-1.43613	1	5.57316	4.98766e-09	1.80925	1	1.00153	1	1.06614	1	6954.06	5300.79	19348.1	18466.9	14294.5	12439
E	At3g02150	^PLASTID TRANSCRIPTION FACTOR 1^TCP13^ TF ^TCP^TEO-type^TCP family transcription factor, putative similar to transcription factor PCF6 [Oryza sativa (japonica cultivar-group)] GI:20975255; contains Pfam profile PF03634: TCP family transcription factor^	-1.05891	1	-1.01247	1	5.18804	1.65577e-10	3.20927	1.04499e-22	1.17716	1	97.1004	97.9262	131.113	848.268	2213.37	2403.19
A	At3g02470	^S-ADENOSYLMETHIONINE DECARBOXYLASE^adenosylmethionine decarboxylase activity;polyamine biosynthesis III^ADENOSYLMETHIONINE DECARBOXYLASE^adenosylmethionine decarboxylase family protein contains Pfam profile: PF01536 adenosylmethionine decarboxylase^	-3.02638	0.0371429	1.19639	1	1.15156	1	-1.2392	1	1.01296	1	24154.4	14865.5	21653.9	21240.8	14353.9	16952.7
A	At3g02910	^ ^ ^ ^expressed protein contains Pfam domain PF03674: Uncharacterised protein family (UPF0131)^	-1.5543	1	-1.60717	1	1.33218	1	-1.66381	0.037162	-1.26762	1	3236.06	2603.86	1501.22	1823.72	1173.22	972.367
E	At3g03190	^GLUTATHIONE S-TRANSFERASE F11^ ^ ^glutathione S-transferase, putative identical to glutathione S-transferase GB:AAB09584 from [Arabidopsis thaliana]^	-1.29767	1	1.97843	9.82573e-07	-1.11317	1	-1.18417	1	1.00274	1	126.401	113.643	211.462	168.7	176.496	232.015
A	At3g03270	AT3G03270.2 expressed protein	-1.09229	1	-1.12295	1	1.20203	1	-1.51188	1	-2.05207	3.22199e-06	12093.2	9015.46	8859.37	9670.39	8220.07	4461.74
D	At3g03450	^RGA-LIKE2^ ^ TF ^GRAS^ ^gibberellin response modulator, putative / gibberellin-responsive modulator, putative similar to GAI (GI:2569938), RGA1 (GB:AAC67333) and RGA2 (GI:2339980) [Arabidopsis thaliana]; possible involvement in nitrogen metabolism^	2.5116	1.23964e-15	1.02986	1	-1.19652	1	1.37615	0.00026516	1.40138	1	1073.9	2261.4	2774.95	3135.07	4010.45	4607.65
B	At3g04140	^ ^protein kinase activity^ ^ankyrin repeat family protein contains ankyrin repeats, Pfam:PF00023^	1.47951	0.0434007	-1.04608	1	-1.06029	1	1.06783	1	-1.21573	1	969.461	1491.02	1299.63	1156.3	1175.97	1099.51
D	At3g04290	^ ^lipase activity^ ^GDSL-motif lipase/hydrolase family protein similar to family II lipases EXL3 GI:15054386, EXL1 GI:15054382, EXL2 GI:15054384 from [Arabidopsis thaliana]; contains Pfam profile: lipase/acylhydrolase with GDSL-like motif^	1.03411	1	3.60863	2.56722e-14	2.6451	1.46889e-10	3.96187	1	1.39841	1	8573.9	7745.57	14687.3	15610.4	16195.3	12454.8
A	At3g04510	^ ^chloroplast^ ^hypothetical protein contains Pfam profile PF04852: Protein of unknown function (DUF640)^	-3.20387	2.07371e-10	-1.25008	1	-1.1109	1	-1.05928	1	-1.31754	1	3798.18	1305.98	901.417	1046.49	671.39	545.367
A	At3g04520	^ ^L-allo-threonine aldolase activity^ ^threonine aldolase family protein similar to L-allo-threonine aldolase SP:O07051 from [Aeromonas jandaei]^	-1.40471	5.5566e-06	-1.08681	1	-1.20291	1	-1.11973	1	-1.24386	1	6613.39	5073.44	4670.32	4192.23	3749.26	3306.76
A	At3g04550	^ ^chloroplast^ ^expressed protein ^	-1.02191	1	1.13047	1	-1.05058	1	1.1016	1	1.42405	0.0252082	1300.66	1214.63	1197.87	1213.66	1211.63	1479.57
B	At3g05000	^ ^ ^ ^transport protein particle (TRAPP) component Bet3 family protein similar to Transport protein particle 33 kDa subunit (TRAPP 33 kDa subunit) (Swiss-Prot:Q99394) [Saccharomyces cerevisiae]; contains Pfam profile PF04051: Transport protein particle (TRAPP) component, Bet3^	1.04936	1	1.28666	1	1.15432	1	1.19281	1	-1.36411	0.011712	9043.98	9090.52	9522.1	8774.06	9311.09	7891.86
A	At3g05030	^NHX2^CPA1(Monovalent Cation:Proton Antiporter-1);Antiporters;sodium ion transporter activity^Sodium proton exchanger family^sodium proton exchanger, putative (NHX2) similar to sodium proton exchanger Nhx1 GB:AAD16946 [Arabidopsis thaliana]; Member of The Monovalent Cation:Proton Antiporter (CPA1) Family, PMID:11500563^	-1.46935	0.00559061	-1.13749	1	-1.08884	1	1.23542	1	-1.05333	1	1166.92	854.342	755.927	746.253	743.386	805.692
C	At3g05160	^ ^C2H2 zinc finger family;SUGAR TRANSPORTERS;MFS(Major Facilitator);Organic Solute Cotransporters;carbohydrate transporter activity^MONOSACCHARIDE-H+ SYMPORTERS;Putative sugar transporter family^sugar transporter, putative similar to sugar-porter family proteins 1 and 2 [Arabidopsis thaliana] GI:14585699, GI:14585701; contains Pfam profile PF00083: major facilitator superfamily protein^	2.09239	0.00372977	-1.03055	1	-1.28003	1	-1.20891	1	-1.34847	1	2813.76	4671.05	4856.62	4275.38	3440.18	3160.29
E	At3g05180	^ ^endomembrane system^ ^GDSL-motif lipase/hydrolase family protein similar to early nodulin ENOD8 [Medicago sativa] GI:304037, elicitor-induced glycoprotein iEP4 [Daucus carota] GI:1911765, lanatoside 15'-O-acetylesterase [Digitalis lanata] GI:3688284; contains InterPro Entry IPR001087 Lipolytic enzyme, G-D-S-L family^	-1.15606	1	1.16302	1	1.37365	1	1.56472	0.00760838	1.12774	1	5385.55	4529.17	4423.12	6208.79	9128.76	10094.8
A	At3g05210	^ ^putative DNA-binding protein;DNA binding activity^ ^nucleotide repair protein, putative similar to nucleotide repair protein [Lilium longiflorum] GI:3297891, SP|P07992 DNA excision repair protein ERCC-1 {Homo sapiens}; contains Pfam profile PF00633: Helix-hairpin-helix motif^	-1.2782	1	-1.03374	1	-1.04425	1	1.05259	1	1.44249	0.00828073	2767.52	2086.64	2450.28	2612.6	2443.25	3028.57
B	At3g05380	^ ^MYB domain transcription factor family;nucleic acid binding activity^ ^myb family transcription factor contains Pfam profile:PF00249 Myb-like DNA-binding domain^	1.03167	1	-1.0074	1	-1.30908	1	-1.42131	1	1.38731	0.00402496	2896.85	3221.97	2766.56	2241.32	2033.55	2571.66
D	At3g05630	^PLDZETA2^Acyl Lipid Metabolism;Phospholipase D;phospholipid biosynthesis;lipases pathway^Other Phospholipase D zeta;PXPH-PLD subfamily;PHOSPHOLIPASE D^phospholipase D, putative (PLDP2) identical to SP|Q9M9W8 Phospholipase D p2 (EC 3.1.4.4) (AtPLDp2) (Phospholipase D2 PHOX and PX containing domain) (Phospholipase D zeta 2) (PLDzeta2) {Arabidopsis thaliana}; similar to phospholipase D GB:BAA24577 …	-1.14675	1	2.80223	1.214e-22	1.14718	1	1.18764	1	1.00193	1	1242.14	1222.85	2629.3	2913.59	3142.76	3129.84
A	At3g05660	^ ^Receptor kinase-like protein family;kinase activity^ ^disease resistance family protein contains leucine rich-repeat (LRR) domains Pfam:PF00560, INTERPRO:IPR001611; similar to Cf-2.2 [Lycopersicon pimpinellifolium] gi|1184077|gb|AAC15780^	-1.42401	1.34839e-05	-1.01781	1	1.00397	1	-1.11268	1	1.04774	1	445.229	312.77	307.947	316.965	275.885	269.823
B	At3g05700	^ ^ ^ ^drought-responsive family protein contains similarity to drought-induced mRNA, Di19 [Arabidopsis thaliana] gi|469110|emb|CAA55321^	1.00028	1	-1.00299	1	1.20436	1	-1.35939	0.00145861	-1.12175	1	3800.83	3608.59	3886.4	4179.11	3509.92	3288.3
D	At3g05980	^ ^ ^ ^expressed protein ^	-1.0513	1	1.18233	1	1.67456	0.0482628	1.84543	4.91262e-14	1.16867	1	337.281	337.311	490.15	883.114	1404.77	1417.55
A	At3g06020	^ ^chloroplast^ ^expressed protein ; expression supported by MPSS^	-2.1682	0.0188801	-1.71688	1	1.23344	1	-1.36721	1	1.06043	1	143.536	63.8609	41.7327	42.1304	34.6945	33.1188
D	At3g06060	^ ^Acyl Lipid Metabolism;SDRs (short-chain dehydrogenase/reductase family);endomembrane system^Ketosphinganine Reductase^short-chain dehydrogenase/reductase (SDR) family protein contains INTERPRO family IPR002198 short-chain dehydrogenase/reductase (SDR) superfamily^	1.09668	1	1.29345	0.0176924	1.20039	1	-1.04236	1	-1.10446	1	3397.41	3310.72	3912.48	5205.07	5109.38	4893.53
E	At3g06120	^ ^BHLH045^ TF ^bHLH^bHLH^basic helix-loop-helix (bHLH) family protein contains Pfam profile: PF00010 helix-loop-helix DNA-binding domain^	-1.02018	1	-1.25821	1	-1.11106	1	5.46522	2.25334e-24	3.67183	8.07216e-18	18.8428	31.9812	37.4694	49.0163	251.749	662.744
B	At3g06270	^ ^PP2C (Protein Phosphatase 2C) Phosphatases;protein amino acid dephosphorylation^ ^protein phosphatase 2C, putative / PP2C, putative similar to protein phosphatase-2C (PP2C) GB:AAC36699 [Mesembryanthemum crystallinum]; contains Pfam profile: PF00481 protein phosphatase 2C^	1.29965	1	-1.20935	1	-1.04843	1	-1.17325	1	-1.40196	0.000949881	3985.62	4594.24	3457.21	3149.1	3457.58	2713.16
B	At3g06590	^ ^BHLH148^ TF ^bHLH^bHLH^expressed protein ^	-1.4101	1	-1.08818	1	1.03814	1	-1.73553	6.093e-07	1.19422	1	5432.31	3995.37	4532.94	5641.17	3816.18	3431.27
D	At3g06770	^ ^Glycoside Hydrolase Family 28;carbohydrate metabolism^ ^glycoside hydrolase family 28 protein / polygalacturonase (pectinase) family protein weak similarity to polygalacturonase [Persea americana] GI:166951; contains PF00295: Glycosyl hydrolases family 28 (polygalacturonases)^	-1.20646	1	1.09135	1	1.63614	0.0384627	1.25068	1	1.24197	1	2401.2	2097.72	2314.8	3914.81	4843.72	4732
D	At3g06840	^ ^ ^ ^expressed protein ^	-1.04062	1	1.12427	1	1.54042	1.26506e-08	1.4134	1	1.091	1	2204.53	1962.93	2286.15	3091.06	4130.88	4048.14
E	At3g06880	^ ^ ^ ^transducin family protein / WD-40 repeat family protein similar to PAK/PLC-interacting protein 1 (GI:4211689) {Homo sapiens}^	-1.61052	1	1.53745	1	1.01934	1	2.32612	4.26688e-10	1.76363	1	835.675	631.704	884.965	915.973	1499.23	2202.2
E	At3g07010	^ ^Lyases;Polysaccharide Lyase Family 1;Polysaccharide Lyase Gene Families;lyase activity^Pectate and pectin Lyases;Polysaccharide Lyase Family 1^pectate lyase family protein similar to pectate lyase GP:14531296 from [Fragaria x ananassa]^	1.16199	1	1.10639	1	1.15743	1	1.81118	0.0492689	1.32948	1	3686.59	3988.24	3632.11	3667.59	5770.73	7027.69
B	At3g07330	^ATCSLC6^Cellulose-synthase-like genes ;Glycosyltransferase Family 2;Glycosyltransferase Gene Families;Putative glucosyltransferase family;cellulose synthase activity^CSLC;Glycosyltransferase- Family 2^glycosyl transferase family 2 protein similar to beta-(1-3)-glucosyl transferase GB:AAC62210 GI:3687658 from [Bradyrhizobium japonicum], cellulose synthase from Agrobacterium tumeficiens [gi:710492…	1.17128	1	-1.11211	1	1.02604	1	-1.06585	1	-1.28113	0.047708	9074.07	11054.3	9713.29	9030.33	9163.07	7657.46
D	At3g08680	^ ^LRR III ;Receptor kinase-like protein family;kinase activity^ ^leucine-rich repeat transmembrane protein kinase, putative contains Pfam profile: PF00069 Eukaryotic protein kinase domain, PF00560 leucine Rich Repeat (5 copies)^	-1.02714	1	1.45131	0.0101104	1.21006	1	1.02946	1	-1.062	1	6513.04	6325.5	7878.58	9611.95	10043.9	9873.74
B	At3g08800	^ ^ ^ ^expressed protein ^	1.03156	1	1.0267	1	-1.11419	1	1.07238	1	-1.26367	1.78923e-10	1194.06	1394.14	1260.19	1075.91	1283.4	1116.27
D	At3g08860	^ ^transaminase activity^ ^alanine--glyoxylate aminotransferase, putative / beta-alanine-pyruvate aminotransferase, putative / AGT, putative similar to similar to SP|Q64565 Alanine--glyoxylate aminotransferase 2, mitochondrial precursor (EC 2.6.1.44) (AGT 2) (Beta-alanine-pyruvate aminotransferase) {Rattus norvegicus}; contains Pfam profile PF00202: aminotransferase, class III^	1.13819	1	1.16297	1	2.89615	3.42157e-18	-1.1061	1	-1.61003	1	189.903	194.738	283.372	616.178	525.587	326.369
A	At3g09260	^ ^glucosidase;Glycoside Hydrolase Family 1;Glycoside Hydrolase Gene Families;endomembrane system^Glycoside Hydrolase Family 1^glycosyl hydrolase family 1 protein contains Pfam PF00232 : Glycosyl hydrolase family 1 domain; TIGRFAM TIGR01233: 6-phospho-beta-galactosidase; almost identical to beta-glucosidase GI:1732570 from [Arabidopsis thaliana]; similar to beta-glucosidase 1 (GI:12043529) [Arabi…	-2.16913	0.213348	1.3209	1	1.40304	1	-1.5434	0.0255008	1.24212	1	739.567	420.283	374.34	467.72	479.415	513.275
C	At3g09350	^ ^ ^ ^armadillo/beta-catenin repeat family protein contains Pfam profile: PF00514 armadillo/beta-catenin-like repeat^	1.19969	1	-1.05991	1	-1.1018	1	1.29358	1	-1.44538	0.00413057	3403.95	4360.84	4480.83	4491.63	5176.94	3920.85
B	At3g09440	^ ^HSP70s^ ^heat shock cognate 70 kDa protein 3 (HSC70-3) (HSP70-3) identical to SP|O65719 Heat shock cognate 70 kDa protein 3 (Hsc70.3) {Arabidopsis thaliana}^	1.38929	0.158372	-1.38868	1	-1.50006	3.70755e-07	1.0153	1	1.75859	0.00261251	10641.7	13655.1	11250.6	10010.7	11141	13737.6
B	At3g09600	^ ^ ^ TF ^MYB-related^ ^myb family transcription factor contains Pfam profile: PF00249 myb-like DNA-binding domain^	-1.00608	1	1.25887	1	-1.13861	1	1.02413	1	1.94899	0.00830656	381.928	448.216	589.383	400.767	384.104	518.621
B	At3g09630	^ ^structural constituent of ribosome^ ^60S ribosomal protein L4/L1 (RPL4A) strong similarity to 60S ribosomal protein L1 GB:P49691^	-4.46255	3.44097e-06	1.12158	1	-1.1	1	-1.17984	1	1.85603	1	14959.2	10857.4	17538.3	14009.1	9558.02	11324
D	At3g09922	^ ^ ^ ^hypothetical protein no ATG start, annotated according to PMID:11123795; IPS1 mRNA, complete sequence GI:8164007^	1.50589	0.241085	6.00766	2.50938e-17	2.52843	7.13985e-29	2.16986	1	1.35129	1	131.585	226.873	1226.15	2545.68	4453.6	4329.33
D	At3g10190	^ ^EF-hand containing proteins:Group IV;mitochondrion^ ^calmodulin, putative similar to calmodulin NtCaM13 [Nicotiana tabacum] GI:14625425, calmodulin GB:AAA34015 [Glycine max]; contains INTERPRO:IPR002048 calcium-binding EF-hand domain^	1.20725	1	1.27631	1	1.24445	1	1.57484	0.0340031	1.02793	1	2120.93	3436.32	4458.77	4958.64	5888.6	5444.25
B	At3g10405	^ ^chloroplast^ ^expressed protein ^	1.11898	1	-1.20137	1	1.01291	1	1.46149	0.00100893	-1.21019	1	2667.07	2916.19	2424.44	2203.83	2428.03	2252.89
D	At3g10525	^ ^ ^ ^expressed protein ^	-1.08471	1	1.2054	1	1.16576	1	1.41149	4.4068e-05	-1.24972	1	1095.35	1168.73	1234.89	1490.78	1643.63	1463.37
E	At3g10720	^ ^Carbohydrate Esterase Family 8;Esterases;Carbohydrate Esterase Gene Families;endomembrane system^Pectin methyl esterases;Carbohydrate Esterase Family 8^pectinesterase, putative contains similarity to pectinesterase from Vitis vinifera GI:15081598, Prunus persica SP|Q43062; contains Pfam profile PF01095 pectinesterase^	-2.13223	0.000190583	-1.37112	1	1.69727	0.0134128	2.09963	3.97785e-13	1.39447	1	2069.87	1176.31	1004.36	1201.46	2323.67	4201.9
E	At3g10960	^ ^chloroplast^ ^xanthine/uracil permease family protein contains Pfam profile: PF00860 permease family^	-1.02496	1	1.31194	1	1.21172	1	1.75028	4.35961e-06	1.04807	1	448.738	513.223	480.332	511.406	891.556	1002.27
D	At3g11000	^ ^ ^ ^expressed protein ^	1.9411	0.000156608	1.2876	1	1.14821	1	1.07318	1	-1.05044	1	378.922	581.926	649.054	665.984	731.062	794.612
C	At3g11090	^ ^ASL12/LBD21^ TF ^AS2/LOB^Class I^LOB domain family protein / lateral organ boundaries domain family protein (LBD21) identical to SP|Q9SRL8 Putative LOB domain protein 21 {Arabidopsis thaliana}; similar to lateral organ boundaries (LOB) domain-containing proteins from Arabidopsis thaliana^	1.53527	0.00669145	1.4167	1	1.50603	1	1.18733	1	-2.01506	0.000316004	3008.9	4518.75	4829.58	5286.08	5255.1	3264.72
B	At3g11230	^ ^ ^ ^yippee family protein similar to qdgl-1 [Coturnix coturnix] GI:10441650, Yippee protein [Homo sapiens] GI:5713281; contains Pfam profile PF03226: Yippee putative zinc-binding protein^	1.39338	4.84913e-07	-1.37301	1	-1.61606	1	-1.06189	1	-1.06212	1	1386.66	1821.76	1721.85	1463.6	1438.98	1205.29
E	At3g11260	^WUSCHEL-related homeobox5^WOX5^ TF ^HB^WUS-like^homeobox-leucine zipper transcription factor family protein similar to wuschel protein (GI:22087128) [Arabidopsis thaliana]; supporting cDNA gi|24953994|gb|AY150812.1|^	-1.04344	1	-1.54502	1	3.03918	1	2.53568	0.00101944	1.22103	1	58.6794	48.0943	36.7501	93.1852	207.433	207.636
E	At3g11280	^ ^ ^ TF ^MYB-related^ ^myb family transcription factor contains Pfam profile: PF00249 Myb-like DNA-binding domain^	-1.74208	0.00185678	1.03324	1	1.51483	1	1.81844	1	1.58643	1	202.583	134.645	157.42	211.218	291.689	382.108
A	At3g11580	^ ^ ^ TF ^ABI3/VP1^ ^DNA-binding protein, putative similar to DNA-binding proteins from [Arabidopsis thaliana] RAV1 GI:3868857 and RAV2 GI:3868859, AP2 domain containing protein RAP2.8 [Arabidopsis thaliana] GI:2281641; contains Pfam profile PF02362: B3 DNA binding domain^	-1.922	0.0017648	-1.11179	1	1.05313	1	-1.23036	1	-1.11729	1	3805.61	1835.2	1572.3	1499.68	1017.72	955.95
A	At3g11680	^ ^Bax inhibitor-1 / TEGT protein homolog family^ ^expressed protein contains Pfam profile PF01027: Uncharacterized protein family UPF0005^	-3.82088	1.35502e-07	-1.58339	1	1.26943	1	-1.2355	1	1.03674	1	657.405	168.742	118.569	115.074	76.5292	90.0002
B	At3g12040	^ ^putative DNA-binding protein;DNA binding activity^ ^DNA-3-methyladenine glycosylase (MAG) identical to DNA-3-methlyadenine glycosylase (MAG) SP:Q39147 from [Arabidopsis thaliana]; contains Pfam profile: PF02245 methylpurine-DNA glycosylase (MPG)^	-1.00551	1	1.04045	1	-1.139	1	1.09841	1	-1.48377	3.0058e-05	1318.16	1430.32	1269.21	1136.41	1102.12	828.515
B	At3g12590	^ ^chloroplast^ ^expressed protein ^	1.05894	1	1.01717	1	-1.09557	1	1.0351	1	-1.29691	0.000456591	672.411	744.447	783.745	753.493	694.372	592.355
D	At3g12610	^DNA-DAMAGE REPAIR/TOLERATION 100^chloroplast^ ^DNA-damage-repair/toleration protein, putative (DRT100) similar to DNA-damage-repair/toleration protein DRT100 [Precursor] SWISS-PROT:Q00874, NCBI_gi:5701788; contains multiple LRR repeats Pfam profile: PF00560^	1.37622	7.9959e-15	1.27173	0.0846381	1.52302	2.85669e-09	1.84795	0.00141101	1.07394	1	5741.48	7514.52	8192.78	9746.12	12681.7	13483.3
E	At3g12760	^ ^ ^ ^expressed protein similar to RP42 protein [Homo sapiens] GI:9896486; contains Pfam profile PF00627: UBA/TS-N domain, PF03556: Domain of unknown function (DUF298)^	1.10825	1	1.31535	1	1.14087	1	1.26777	1	6.22655	7.40892e-33	108.71	119.031	138.263	178.225	518.39	1958.03
A	At3g12830	^ ^SAUR;mitochondrion^ ^auxin-responsive family protein similar to auxin-induced protein (SP:P33082) [Glycine max]^	-2.42013	9.45791e-14	1.24135	1	-1.04638	1	-1.31459	1	-1.46808	1	18216.5	7400.69	7167.43	7501.08	4627.92	4052.78
A	At3g12890	^ ^ ^ ^expressed protein ^	-2.74618	2.24112e-10	-1.26152	1	1.3808	1	-1.13532	1	-1.2952	1	451.947	188.206	162.561	162.882	146.183	129.335
B	At3g13010	^ ^ ^ ^hAT dimerisation domain-containing protein contains Pfam profile PF04937: Protein of unknown function (DUF 659), weak hit to PF05699: hAT family dimerisation domain^	1.48101	0.00469947	1.23951	1	-1.13825	1	-1.08777	1	-1.22576	1	150.397	212.944	223.37	178.031	162.124	129.829
A	At3g13130	^ ^endomembrane system^ ^hypothetical protein ^	-3.81084	8.43368e-08	-1.8113	1	1.11613	1	-2.24719	9.97196e-10	-1.23212	1	6116.03	1871.14	1602.99	1458.72	584.763	723.937
A	At3g13190	^ ^ ^ ^myosin heavy chain-related contains weak similarity to Myosin II heavy chain, non muscle (Swiss-Prot:P05659) [Acanthamoeba castellanii]^	-1.89312	0.0452239	-1.28372	1	-1.04886	1	-1.3055	1	1.45801	1	9194.72	5997.42	5749.3	6174.43	6751.11	6579.28
C	At3g13310	^ ^chloroplast^ ^DNAJ heat shock N-terminal domain-containing protein similar to J11 protein [Arabidopsis thaliana] GI:9843641; contains Pfam profile: PF00226 DnaJ domain^	1.21202	1	1.65402	0.00179302	-1.34064	1	-1.32489	1	-1.1168	1	2726.7	3038.19	5402.76	4160.67	3016.9	2846.1
A	At3g13445	^TATA BINDING PROTEIN 1^Global transcription factor group F (TBP homologs);transcription initiation factor activity^ ^transcription initiation factor IID-1 (TFIID-1) / TATA-box factor 1 / TATA sequence-binding protein 1 (TBP1) identical to Swiss-Prot:P28147 transcription initiation factor TFIID-1 (TATA-box factor 1)(TATA sequence-binding protein 1) (TBP-1) [Arabidopsis thaliana]^	-2.11741	3.40186e-10	-1.18944	1	-1.33675	1	-1.53726	3.0373e-08	-1.03906	1	2012.93	1283.29	1179.45	860.63	622.665	674.343
B	At3g13480	^ ^endomembrane system^ ^expressed protein ; expression supported by MPSS^	1.59116	0.00865458	-1.08798	1	-1.08294	1	-1.05948	1	-1.09939	1	2936.57	4526.31	3340.87	3478.99	4084.8	3442.4
A	At3g13662	^ ^endomembrane system^ ^disease resistance-responsive protein-related / dirigent protein-related similar to pathogenesis-related protein [Pisum sativum] gi|4585273|gb|AAD25355; similar to dirigent protein [Forsythia x intermedia] gi|6694695|gb|AAF25358^	-2.69569	1.90735e-13	-1.20889	1	1.15127	1	1.06528	1	-1.03244	1	291.906	129.205	111.218	119.265	118.538	106.091
D	At3g14060	^ ^chloroplast^ ^expressed protein ^	3.66676	6.09376e-33	1.58349	1	1.07466	1	1.11243	1	-1.41078	3.48395e-05	649.797	2347.33	3809.6	4790.76	4807.3	3557.37
D	At3g14190	^ ^ ^ ^expressed protein ^	1.1169	1	1.43291	9.71958e-07	1.1256	1	1.07016	1	-1.19594	1	12927.5	11460.2	14661.4	17491.3	16796.1	14284.3
B	At3g14370	^ ^IRE/NPH/Phosphoinositide dependent/Ribosomal Protein S6 ;protein kinase activity^ ^protein kinase family protein contains protein kinase domain, Pfam:PF00069^	1.22467	1	-1.55501	5.22046e-07	-1.58358	3.94598e-06	-1.79711	2.68842e-07	1.10515	1	538.74	776.901	511.494	292.049	195.054	197.687
E	At3g14395	^ ^ ^ ^expressed protein ^	-1.52766	1	-1.36623	1	1.79332	0.0192782	1.23807	1	1.38793	1	1300.1	1020.73	659.644	1014.85	1319.1	2196.56
A	At3g14590	^ ^endomembrane system^ ^C2 domain-containing protein low similarity to SP|Q16974 Calcium-dependent protein kinase C (EC 2.7.1.-) {Aplysia californica}; contains Pfam profile PF00168: C2 domain^	-1.85282	6.1996e-07	-1.47857	0.214163	-1.24896	1	-1.1128	1	1.04185	1	672.889	437.998	366.087	253.864	187.207	175.792
E	At3g14760	^ ^endomembrane system^ ^expressed protein ^	1.19268	1	-1.11296	1	-1.08705	1	2.12231	6.8708e-08	1.47467	1	230.837	304.337	292.806	246.86	523.119	661.168
A	At3g14770	^ ^MTN3-like protein family;molecular_function unknown^ ^nodulin MtN3 family protein similar to MtN3 GI:1619602 (root nodule development) from [Medicago truncatula]^	-1.62927	5.7943e-06	1.29075	1	1.34477	1	-1.04764	1	1.17019	1	1208.38	810.031	780.095	814.449	978.971	963.476
E	At3g14840	^ ^S-Domain Kinase (Type 1) ;receptor activity^ ^leucine-rich repeat family protein / protein kinase family protein contains Pfam domains PF00560: Leucine Rich Repeat and PF00069: Protein kinase domain; contains 2 predicted transmembrane domains^	-1.31078	1	1.04316	1	-1.18119	1	1.24695	1	1.28244	0.0282384	1544.08	1303.27	1425.57	1477.58	1688.45	2277.43
A	At3g14840	AT3G14840.2 receptor-like serinethreonine kinase putative similar to receptor-like serinethreonine kinase GB AAC50043 GI 2465923 from Arabidopsis thaliana	-1.52643	1.01806e-05	-1.12447	1	1.12442	1	1.1356	1	1.29111	1	1544.08	1303.27	1425.57	1477.58	1688.45	2277.43
E	At3g15030	^ ^TCP4^ TF ^TCP^TEO-type^TCP family transcription factor, putative similar to TCP3 GB:AAC24010 [Arabidopsis thaliana]^	-1.02746	1	1.16483	1	2.0092	1	1.94011	3.36067e-10	1.21567	1	95.6307	88.3434	95.1225	138.454	203.794	294.457
C	At3g15170	^CUP-SHAPED COTYLEDON1^ANAC054^ TF ^NAC^ ^cup-shaped cotyledon1 protein / CUC1 protein (CUC1) identical to CUP-SHAPED COTYLEDON1 (CUC1) (GI:12060422) [Arabidopsis thaliana]^	1.67112	3.41542e-21	1.5721	1	1.30922	1	-1.58941	1	-1.43963	1	5239.1	8313.64	8701.14	10132.3	7258.69	6257.92
B	At3g15210	^ ^ ^ TF ^AP2/ERF^ERF-EREBP^ethylene-responsive element-binding factor 4 (ERF4) identical to ethylene responsive element binding factor 4 SP:O80340 from [Arabidopsis thaliana]^	1.30457	0.000831649	-1.16349	1	-1.1005	1	1.30536	1	1.01939	1	6891.99	7842.61	7313.35	6278.15	6239.98	6418.8
D	At3g15270	^ ^SPL5^ TF ^SBP (Zn)^ ^squamosa promoter-binding protein-like 5 (SPL5) identical to squamosa promoter binding protein-like 5 [Arabidopsis thaliana] GI:5931629; contains Pfam profile PF03110: SBP domain^	-1.31604	1	-1.49116	1	1.51225	1	1.70867	0.0171232	1.19569	1	9497.96	7884.03	7648.93	12027.9	12332.7	13942.1
C	At3g15300	^ ^chloroplast^ ^VQ motif-containing protein contains PF05678: VQ motif^	1.59958	0.000889447	-1.08785	1	1.22755	1	1.11777	1	-1.32576	1	613.636	977.493	1004.63	1023.01	911.635	722.924
E	At3g15360	^ ^thioredoxin^ ^thioredoxin M-type 4, chloroplast (TRX-M4) nearly identical to SP|Q9SEU6 Thioredoxin M-type 4, chloroplast precursor (TRX-M4) {Arabidopsis thaliana}^	1.02402	1	-1.23431	1	1.23613	1	1.23073	1	1.85335	0.00105059	5132.85	5441.49	5460.16	6907.93	7050.65	9621.67
D	At3g15530	^ ^methyltransferase activity^ ^expressed protein ^	1.18323	1	2.14434	3.57418e-09	-1.11469	1	-1.23538	1	1.26434	1	3787.48	4088.7	5375.95	6008.7	5372.98	6269.83
B	At3g15650	^ ^Acyl Lipid Metabolism;lysophospholipase activity^Lysophospholipase^phospholipase/carboxylesterase family protein low similarity to lysophospholipase I [Mus musculus] GI:1864159; contains Pfam profile PF02230: Phospholipase/Carboxylesterase family^	1.11259	1	-1.48722	3.93547e-05	-1.16624	1	-1.85271	0.0019662	-1.51491	1	11311.5	11936.6	7757.2	7101.96	4493.08	3325.31
C	At3g15720	^ ^Glycoside Hydrolase Family 28;GPI-anchored protein;Glycoside Hydrolase Gene Families;endomembrane system^Polygalacturonase;Glycoside Hydrolase Family 28^glycoside hydrolase family 28 protein / polygalacturonase (pectinase) family protein similar to polygalacturonase [Cucumis sativus] GI:6624205; contains Pfam profile PF00295: Glycosyl hydrolases family 28 (polygalacturonases)^	1.82385	0.00289069	-1.28831	1	-1.24956	1	1.17898	1	1.08628	1	999.884	2130.55	2016.27	1681.72	1738.44	1467.53
B	At3g15750	^ ^ ^ ^expressed protein ^	-1.0205	1	1.41933	1	-1.58029	4.45389e-07	-1.15429	1	1.28927	1	1009.13	1127.88	1199.47	903.32	929.42	878.011
E	At3g15820	^ ^chloroplast^ ^phosphatidic acid phosphatase-related / PAP2-related contains Pfam profile PF01569: PAP2 superfamily^	1.06932	1	1.08784	1	1.25371	1	1.34597	1	1.84522	6.47449e-07	1352.71	1568.72	1652.62	1785.48	1884.58	2758.64
E	At3g16150	^ ^asparaginase activity;asparagine degradation 1^L-ASPARAGINASE^L-asparaginase, putative / L-asparagine amidohydrolase, putative similar to Swiss-Prot:P30364 L-asparaginase (EC 3.5.1.1) (L-asparagine amidohydrolase) [Lupinus angustifolius]^	-1.31894	0.0114551	1.13402	1	1.19092	1	1.36738	1	1.16578	1	4069.83	4038.68	3538.63	3691.91	4286.45	5055.73
A	At3g16340	^ ^ABC(ATP-Binding Cassette);ABC Superfamily;ABC transporters;ATP-binding cassette (ABC) transporter activity^PDR subfamily;Putative ABC transporter^ABC transporter family protein similar to PDR5-like ABC transporter GI:1514643 from [Spirodela polyrhiza]; contains Pfam profile: PF00005 ABC transporter^	-2.64992	3.8151e-20	-1.0993	1	1.11912	1	1.06225	1	1.11748	1	2769.2	1173.64	943.435	1038.58	1132.73	1229.02
E	At3g16380	^POLY(A) BINDING PROTEIN 6^Protein synthesis factors;translation initiation factor activity^PABP - poly(A) binding protein^polyadenylate-binding protein, putative / PABP, putative similar to polyadenylate-binding protein (poly(A)-binding protein) from {Arabidopsis thaliana} SP|P42731, [Cucumis sativus] GI:7528270, {Homo sapiens} SP|Q13310, {Arabidopsis thaliana} SP|Q05196; contains InterPro entry…	1.12137	1	-1.05505	1	-1.00059	1	1.54797	1.78998e-06	1.67824	1.43046e-06	131.683	135.063	133.396	130.871	218.171	350.896
A	At3g16390	^ ^lectin^ ^jacalin lectin family protein similar to myrosinase-binding protein homolog [Arabidopsis thaliana] GI:2997767, epithiospecifier [Arabidopsis thaliana] GI:16118845; contains Pfam profiles PF01419 jacalin-like lectin family, PF01344 Kelch motif^	-1.31782	1	-1.53219	0.0143932	-1.37386	1	-1.63368	0.198579	-1.04686	1	2990.72	2387.8	1705.37	1248.79	846.639	677.971
A	At3g16400	^MYROSINASE-BINDING PROTEIN-LIKE PROTEIN-470^JA;lectin^ ^jacalin lectin family protein similar to myrosinase-binding protein homolog [Arabidopsis thaliana] GI:2997767, epithiospecifier [Arabidopsis thaliana] GI:16118845; contains Pfam profiles PF01419 jacalin-like lectin family, PF01344 Kelch motif^	-1.55228	1	-1.69364	0.00170575	-1.46947	1	-1.49117	1	-1.40993	1	15473	11597.2	9813.58	8834.69	7100.39	4244.55
D	At3g16430	^ ^JA;lectin^ ^jacalin lectin family protein similar to myrosinase binding protein [Brassica napus] GI:1711296; contains Pfam profile PF01419 jacalin-like lectin domain^	-1.60504	0.00820999	-1.02554	1	2.43696	0.0273383	1.09708	1	-1.28504	1	756.438	465.75	499.359	1109.21	1565.88	1445.75
A	At3g16565	^ ^alanine-tRNA ligase activity^ ^alanyl-tRNA synthetase-related low similarity to SP|Q56273 Alanyl-tRNA synthetase (EC 6.1.1.7) (Alanine--tRNA ligase) (AlaRS) {Thiobacillus ferrooxidans}^	-1.08205	1	-1.0167	1	1.03816	1	-1.22263	1	1.35397	0.00656307	835.484	814.626	700.077	666.764	675.226	815.482
C	At3g16730	^ ^ ^ ^expressed protein ; expression supported by MPSS^	-1.02836	1	1.43705	1	-1.46297	0.0256936	1.02438	1	-1.42504	1	2051.26	2144.01	2802.2	2276.5	2571.3	2233.25
B	At3g16750	^ ^ ^ ^expressed protein ; expression supported by MPSS^	1.05975	1	-1.0805	1	-1.15246	1	-1.06772	1	-1.77711	0.000108679	1034.23	1155.38	1146.86	1162.68	1007.42	703.876
D	At3g17010	^ ^B3 transcription factor family^ ^transcriptional factor B3 family protein contains Pfam profile PF02362: B3 DNA binding domain^	4.6623	2.64225e-10	5.19802	9.9443e-20	3.64136	3.28951e-35	1.58515	0.000627884	1.2301	1	110.821	725.736	3113.61	8910.09	10823.2	13174.9
D	At3g17070	^ ^Class III peroxidase;endomembrane system^ ^peroxidase, putative similar to peroxidase GB:AAD37376 [Glycine max]^	1.20009	1	1.54244	9.44437e-10	1.22061	1	1.23163	1	1.33643	1	199.138	255.068	470.331	668.964	824.686	1024.91
B	At3g17100	^ ^BHLH147^ TF ^bHLH^bHLH^expressed protein ^	1.06915	1	1.00077	1	-1.09553	1	-1.43111	0.00578751	-1.11011	1	2086.27	2132.81	2194	2300.09	1652.61	1654.96
A	At3g17200	^ ^ ^ ^hypothetical protein ^	-2.22198	0.0147233	-1.14455	1	-1.06312	1	1.08939	1	1.26741	1	251.427	130.104	126.041	110.161	119.872	179.926
C	At3g17290	AT3G17290_1 hypothetical protein predicted by genmark similar to PUTATIVE AC TRANSPOSASE (ORFA)GB P08770 from Zea mays	-1.24235	1	2.01239	1	-1.1288	1	-1.13865	1	1.98095	4.57382e-05	319.192	282.079	532.62	328.955	489.764	482.736
A	At3g17380	^ ^ ^ ^meprin and TRAF homology domain-containing protein / MATH domain-containing protein similar to ubiquitin-specific protease 12 [Arabidopsis thaliana] GI:11993471; contains Pfam profile PF00917: MATH domain^	-1.56014	3.51346e-05	-1.17253	1	1.10805	1	-1.08831	1	-1.12059	1	1039.03	566.997	460.247	510.784	485.567	520.647
B	At3g17430	^ ^DMT(The Drug/Metabolite Transporter);Organic Solute Cotransporters;organic anion transporter activity^Putative phosphate/phosphoenolpyruvate translocator protein family^phosphate translocator-related low similarity to phosphoenolpyruvate/phosphate translocator precursor [Mesembryanthemum crystallinum] GI:9295275, SP|P52178 Triose phosphate/phosphate translocator, non-green plastid, chloroplast…	1.26467	0.0149061	-1.0353	1	-1.12368	1	-1.08111	1	-1.17542	1	2972.19	3330.21	3231.47	2949.52	2694.28	2646.79
D	At3g17580	^ ^chloroplast^ ^hypothetical protein similar to hypothetical protein GB:AAD49763 from [Arabidopsis thaliana]^	1.2622	1	1.56243	1	2.81115	2.21602e-09	2.03188	1.63438e-09	1.03238	1	61.1333	71.4647	178.614	662.151	1542.41	1767.11
B	At3g17600	^ ^IAA31^ TF ^Aux/IAA^ ^auxin-responsive protein, putative similar to SP|O24410 Auxin-responsive protein IAA20 (Indoleacetic acid-induced protein 20) {Arabidopsis thaliana}; contains Pfam profile: PF02309: AUX/IAA family^	-1.10389	1	-1.0952	1	-1.44236	2.17167e-07	-1.28166	1	-1.18283	1	1229.48	1245.11	928.603	533.847	393.714	363.907
B	At3g17609	^HY5-HOMOLOG^AtbZIP64^ TF ^bZIP^ ^bZIP transcription factor family protein / HY5-like protein (HYH) nearly identical to HY5-like protein [Arabidopsis thaliana] GI:18042111; similar to TGACG-motif binding factor GI:2934884 from [Glycine max]; contains Pfam profile: PF00170 bZIP transcription factor^	-1.34834	1	-1.11156	1	1.01358	1	-1.1883	1	-1.25744	1.14019e-06	3337.74	3619.49	3831.83	3561.77	2644.74	2192.84
E	At3g17640	^ ^endomembrane system^ ^leucine-rich repeat family protein contains leucine rich-repeat domains Pfam:PF00560, INTERPRO:IPR001611; contains some similarity to receptor-like protein kinase INRPK1 [Ipomoea nil] gi|14495542|gb|AAB36558^	2.00417	0.000944673	1.12408	1	-1.00685	1	1.93765	0.26246	-1.08617	1	500.88	822.012	750.751	757.025	1361.47	1591.01
A	At3g17760	^ ^GAD;glutamate decarboxylation to succinate;glutamate degradation I^GLUTAMATE DECARBOXYLASE^glutamate decarboxylase, putative similar to glutamate decarboxylase GB:Q07346 [Petunia x hybrida] (J. Biol. Chem. 268 (26), 19610-19617 (1993))^	-3.06581	1.67365e-22	-1.67625	1	-1.03772	1	-1.55683	1	1.15911	1	434.167	190.905	250.378	159.098	102.344	113.099
C	At3g17790	^ ^phosphoric monoester hydrolase activity^ ^acid phosphatase type 5 (ACP5) contains Pfam profile: PF00149 calcineurin-like phosphoesterase; nearly identical to acid phosphatase type 5 (GI:10278031) [Arabidopsis thaliana]^	-1.39639	1	3.13285	5.7463e-18	-1.02677	1	-1.41305	1	1.16538	1	16113.7	10121	21949.6	19504.4	15447.7	15109.2
E	At3g17930	^ ^chloroplast^ ^expressed protein ^	1.11044	1	1.15908	1	1.52604	0.000420564	1.94928	0.00201104	1.68849	1	1441.95	1634	1740.02	2074.83	4536.52	6959.4
A	At3g18000	^N-METHYLTRANSFERASE 1^Acyl Lipid Metabolism;methyltransferase activity;CO<SUB>2</SUB> formation from methanol;carbon monoxide dehydrogenase pathway^Phosphoethanolamine N-Methyltransferase;METHYLTRANSFERASE^phosphoethanolamine N-methyltransferase 1 / PEAMT 1 (NMT1) identical to Phosphoethanolamine N-methyltransferase 1 (EC 2.1.1.103) (PEAMT 1) (AtNMT1) (SP:Q9FR44){Arabidopsis thaliana}; strong si…	-1.48368	1	1.81182	1.38075e-05	1.28795	1	1.26193	1	1.1985	1	29731.7	19301.1	25522.4	21840.5	19519.9	19820.7
B	At3g18740	^ ^structural constituent of ribosome^ ^60S ribosomal protein L30 (RPL30C) similar to 60S RIBOSOMAL PROTEIN L30 GB:O49884 from [Lupinus luteus]^	-1.13778	1	-1.9402	1	1.21468	1	-2.51887	1.16447e-08	1.07256	1	19961.5	22625.1	19451.2	21986.7	17746.6	16155.4
B	At3g19010	^ ^iron ion binding activity;flavonoid biosynthesis^FLAVONOL SYNTHASE^oxidoreductase, 2OG-Fe(II) oxygenase family protein contains similarity to flavonol synthase (FLS) from [Solanum tuberosum] SP|Q41452, {Petunia hybrida} SP|Q07512; contains Pfam profile PF03171: oxidoreductase, 2OG-Fe(II) oxygenase family^	1.12545	1	-1.03088	1	-1.42284	1	-1.07893	1	-1.58033	0.00828073	3915.27	4261.31	4155.97	4168.23	4243.62	3034.39
B	At3g19130	^ATRBP47B^ ^ ^RNA-binding protein, putative similar to RNA Binding Protein 47 [Nicotiana plumbaginifolia] GI:9663769, DNA binding protein ACBF GB:AAC49850 from [Nicotiana tabacum]; contains InterPro entry IPR000504: RNA-binding region RNP-1 (RNA recognition motif) (RRM)^	-1.00988	1	-1.24391	0.0156849	1.01869	1	1.03756	1	-1.29976	1	5337.76	5384.04	4920.05	4701.18	4230.88	3622.62
B	At3g19180	^ ^chloroplast^ ^cell division protein-related weak similarity to cell division protein Ftn2 [Synechococcus sp. PCC 7942] GI:16226084^	-1.04687	1	1.32715	0.000318732	-1.17529	1	-1.25002	1	-1.25883	1	1021.83	1189.99	1156.49	904.124	852.584	781.581
A	At3g19660	^ ^ ^ ^expressed protein ^	-1.76961	0.000226134	-1.37704	1	-1.05166	1	-1.07542	1	-1.11216	1	303.328	198.379	178.42	170.382	179.016	176.4
B	At3g19750	^ ^ ^ ^hypothetical protein ^	-1.02826	1	1.30534	1	-1.99786	0.0107335	-1.07434	1	1.02223	1	958.041	880.008	1068.63	869.011	937.188	1184.89
A	At3g19850	^ ^signal transducer activity^ ^phototropic-responsive NPH3 family protein contains NPH3 family domain, Pfam:PF03000^	-1.88623	2.87075e-10	-1.15029	1	1.00044	1	-1.2062	1	-1.00467	1	1112.53	838.135	762.032	664.444	564.011	513.384
B	At3g19860	^ ^BHLH121^ TF ^bHLH^bHLH^basic helix-loop-helix (bHLH) family protein contains Pfam profile: PF00010 helix-loop-helix DNA-binding domain^	-1.1032	1	-1.24254	1	1.18185	1	-1.29228	0.00412417	1.02792	1	5622.55	5084.82	3725.3	3861.05	3373.23	3282.44
B	At3g19990	^ ^ ^ ^expressed protein ^	1.52901	0.0462643	-1.3643	1	-1.01497	1	-1.03034	1	-1.01328	1	2720.99	3860.22	2676.57	2371.01	2576.03	2217.42
C	At3g20180	^ ^ ^ ^hypothetical protein ^	1.43508	0.00909903	1.08237	1	1.00299	1	1.13944	1	1.00035	1	626.395	837.387	852.922	937.592	957.823	891.53
A	At3g20380	^ ^ ^ ^meprin and TRAF homology domain-containing protein / MATH domain-containing protein weak similarity to ubiquitin-specific protease 12 [Arabidopsis thaliana] GI:11993471; contains Pfam profile PF00917: MATH domain^	-2.92919	0.000131631	-1.20162	1	-1.21987	1	-1.05391	1	-1.29971	1	248.456	103.653	76.1243	77.3621	73.9464	78.0227
E	At3g20820	^ ^endomembrane system^ ^leucine-rich repeat family protein contains similarity to Cf-2.1 [Lycopersicon pimpinellifolium] gi|1184075|gb|AAC15779; contains leucine rich-repeat domains Pfam:PF00560, INTERPRO:IPR001611^	-1.10199	1	1.26864	1	1.08371	1	-1.09855	1	1.59761	3.43463e-06	9372.33	6798.32	9389.9	10319.3	8898.56	12322.2
C	At3g21175	^ ^ZML1^ TF ^GATA (Zn)^ ^zinc finger (GATA type) family protein similar to zinc finger protein ZIM gi:8918533 from [Arabidopsis thaliana]; contains Pfam PF00320: GATA zinc finger^	1.22298	0.0214938	-1.08964	1	1.01817	1	-1.03986	1	-1.39592	1	2886.58	3246.11	3464.16	3572.61	3294.24	2781.87
A	At3g21420	^ ^iron ion binding activity^ ^oxidoreductase, 2OG-Fe(II) oxygenase family protein similar to SP|Q9ZWQ9 Flavonol synthase (EC 1.14.11.-) {Citrus unshiu}; contains Pfam profile PF03171: oxidoreductase, 2OG-Fe(II) oxygenase family^	-1.41525	1	-1.00377	1	-1.01344	1	-1.52129	0.00026516	-1.58123	1	4458.08	3031.42	2687.17	2192.64	1555.25	1235.77
C	At3g21430	^ ^ ^ ^expressed protein ^	1.13676	1	-1.01445	1	-1.0447	1	1.14351	1	-1.43548	0.0168302	2030.42	2559.71	2759.04	2599.93	2294.34	1886.04
A	At3g21510	^HISTIDINE-CONTAINING PHOSPHOTRANSMITTER 3^Cytokinin;Histidine Phosphotransfer Proteins;two-component signal transduction system (phosphorelay)^ ^two-component phosphorelay mediator 3 (HP3) identical to ATHP3 [Arabidopsis thaliana] GI:4156245^	-1.553	1	-1.80311	0.000775172	1.25425	1	1.08477	1	1.19357	1	2529.4	1604.86	852.577	885.253	859.653	1058.9
D	At3g21550	^ ^ ^ ^expressed protein contains Pfam profile PF05078: Protein of unknown function (DUF679)^	-1.67231	0.00135481	-1.36033	0.0535737	2.59863	1	1.59227	4.36896e-08	-1.11306	1	807.566	516.072	507.748	1267.01	1545.59	1011.63
D	At3g21560	^ ^Glycosyl transferases;Glycosyltransferase Family 1;metabolism^GT family 1^UDP-glucosyltransferase, putative similar to UDP-glucose:sinapate glucosyltransferase GI:9794913 from [Brassica napus]^	-1.20215	1	2.48497	1.14823e-12	1.06062	1	-1.11137	1	1.03538	1	1336.13	1277.26	3071.87	4605.81	3494.75	3825.19
D	At3g21670	^ ^POT(Proton-dependent Oligopeptide Transporter);Organic Solute Cotransporters;transporter activity^Similar to LeOPT1 family^nitrate transporter (NTP3) nearly identical to nitrate transporter [Arabidopsis thaliana] GI:4490323; contains Pfam profile: PF00854 POT family^	2.69739	1.03255e-11	1.47777	0.00125534	1.0558	1	1.06042	1	1.00428	1	449.324	853.957	1337.52	1391.98	1731.5	1796.51
E	At3g21690	^ ^MATE(Multi Antimicrobial Extrusion)^ ^MATE efflux family protein similar to ripening regulated protein DDTFR18 [Lycopersicon esculentum] GI:12231296; contains Pfam profile: PF01554 MatE uncharacterized membrane protein family^	-1.8604	0.00352005	1.44948	1	1.21688	1	1.04971	1	1.22655	1	7557.14	5095.5	4996.33	6762.56	9912.31	9345.78
B	At3g21770	^ ^Glycosyl transferases;Class III peroxidase;glycosyltransferase^GT family 1^peroxidase 30 (PER30) (P30) (PRXR9) identical to SP|Q9LSY7 Peroxidase 30 precursor (EC 1.11.1.7) (Atperox P30) (PRXR9) (ATP7a) {Arabidopsis thaliana}^	-1.1155	1	-1.25514	1	-1.2914	1	-1.50886	0.0276854	-1.90126	0.00195629	8698.15	8164.38	6681.84	5111.07	3835.16	2326.59
D	At3g21890	^ ^ ^ TF ^CO-like (Zn)^ ^zinc finger (B-box type) family protein contains Pfam profile: PF01760 CONSTANS family zinc finger^	1.30457	1	1.54912	0.00019529	1.02448	1	1.09995	1	1.04042	1	235.251	310.885	426.138	432.02	440.224	617.706
A	At3g22140	AT3G22140_1 hypothetical protein predicted by genscan+	-1.44183	1	1.23197	1	1.29608	1.10335e-05	1.01455	1	-1.27303	1	1629.27	910.365	1025.38	1453.73	1370.71	1367.02
C	At3g22160	^ ^chloroplast^ ^VQ motif-containing protein contains PF05678: VQ motif^	3.09818	0	2.60569	1.34355e-05	1.76099	0.00173659	1.15945	1	-1.1995	1	788.03	1686.49	2167.66	2044.01	1711.28	1053.95
D	At3g22370	^ ^Alternative oxidase family;alternative oxidase activity^ ^alternative oxidase 1a, mitochondrial (AOX1A) identical to GB:Q39219 [SP|Q39219] from [Arabidopsis thaliana]^	1.62217	1.54848e-07	-1.0833	1	1.33713	1	1.28852	1	-1.25577	1	1028.15	1777.31	1558.29	1800.24	2433.84	2240.79
C	At3g22530	^ ^endomembrane system^ ^expressed protein contains Pfam profile:PF00011 HSP20:Hsp20/alpha crystallin family^	1.20131	1	-1.09018	1	1.14467	1	1.2516	1	-1.56321	0.00317844	3620.7	3985.59	3918.6	4591.63	4883.46	3507.21
A	At3g22540	^ ^ ^ ^expressed protein ^	-1.42928	0.51916	-1.51973	1	-1.23096	1	-1.64532	1.25918e-05	-1.32261	1	16932	11571.6	10859.7	8078.86	5728.36	4178.67
A	At3g22550	^ ^mitochondrion^ ^senescence-associated protein-related similar to senescence-associated protein SAG102 (GI:22331931) [Arabidopsis thaliana]^	-1.85358	1	-1.34488	1	1.0276	1	-1.82222	5.3302e-09	1.00858	1	18032.4	10689.9	10503.8	8868.94	5717.82	5820.43
A	At3g22560	^ ^N-acetyltransferase activity^ ^GCN5-related N-acetyltransferase (GNAT) family protein contains Pfam profile:PF00583 Acetyltransf:Acetyltransferase (GNAT) family^	-1.54572	1	-2.43301	2.10032e-06	-1.77765	0.130086	-1.38735	0.0139123	-1.28207	1	3816.9	3006.86	1561.19	1184.76	911.357	731.293
D	At3g23130	^SUPERMAN^ ^ TF ^C2H2 (Zn)^ ^superman protein (SUP) / zinc finger (C2H2 type) family protein identical to superman protein GB:S60325 from [Arabidopsis thaliana]; contains Pfam domain, PF00096: Zinc finger, C2H2 type^	1.57082	1	4.12707	8.79549e-20	2.17252	4.32702e-11	-1.00459	1	-1.65027	1	95.1907	173.958	918.456	2101.18	1839.88	1235.9
A	At3g23290	^ ^chloroplast^ ^expressed protein contains Pfam profile PF04852: Protein of unknown function (DUF640)^	-3.1599	2.99354e-33	1.05146	1	1.6962	1	1.12781	1	-1.04299	1	6353.33	2099.35	2545.48	4438.23	4125.94	3941.59
A	At3g23295	^ ^mitochondrion^ ^expressed protein ^	-2.30608	0.0151413	-1.06565	1	1.67336	0.000468442	1.51329	1	-1.34907	1	6782.97	2494.06	2655.6	4439.41	3642.44	3428.56
E	At3g23410	^ ^Acyl Lipid Metabolism;endomembrane system^Fatty Acid Alcohol Oxidase^alcohol oxidase-related similar to long chain fatty alcohol oxidase from Candida cloacae [GI:6983581], Candida tropicalis [GI:6983594]^	1.15209	1	1.03748	1	1.56607	1	2.05227	3.28422e-14	2.53777	4.73351e-26	116.843	122.53	120.004	189.791	437.769	1121.93
E	At3g23480	^ ^cyclopropane-fatty-acyl-phospholipid synthase activity^ ^cyclopropane fatty acid synthase-related similar to cyclopropane synthase [Sterculia foetida] GI:21069167^	1.03131	1	1.06235	1	1.05487	1	1.47334	1	2.43771	0.00114327	67.913	67.8216	68.9576	86.3754	137.871	312.537
B	At3g23560	^ABERRANT LATERAL ROOT FORMATION 1^MATE(Multi Antimicrobial Extrusion);response to toxin^ ^MATE efflux family protein similar to ripening regulated protein DDTFR18 [Lycopersicon esculentum] GI:12231296; contains Pfam profile: PF01554 uncharacterized membrane protein family^	-1.00418	1	-1.51735	0.0427664	-1.22071	1	1.3493	1	1.09536	1	12979.1	15679	10857.9	8355.55	12367.9	14078.6
A	At3g23570	^ ^ 1,4-dichlorobenzene catabolism;1,4-dichlorobenzene degradation pathway ^DIENELACTONE HYDROLASE^dienelactone hydrolase family protein similar to SP|Q9ZT66 Endo-1,3;1,4-beta-D-glucanase precursor (EC 3.2.1.-) {Zea mays}; contains Pfam profile: PF01738 dienelactone hydrolase family^	-2.03126	5.01771e-05	1.04138	1	1.21342	1	1.02731	1	-1.13881	1	1942.69	1161.87	1193.77	1217.67	1383.78	1175.15
B	At3g23605	^ ^ ^ ^UBX domain-containing protein contains Pfam profile PF00789: UBX domain^	1.07154	1	-1.27612	1	-1.26723	1	1.11934	1	-1.47826	0.00399863	1975.6	2325.31	2608.64	2303.76	2221.91	1666.01
E	At3g23810	^ ^adenosylhomocysteinase activity^ ^adenosylhomocysteinase, putative / S-adenosyl-L-homocysteine hydrolase, putative / AdoHcyase, putative strong similarity to SP|P50248|SAHH_TOBAC Adenosylhomocysteinase (EC 3.3.1.1) (S-adenosyl-L-homocysteine hydrolase) (AdoHcyase) {Nicotiana sylvestris}; contains Pfam profile PF00670: S-adenosyl-L-homocysteine hydrolase, NAD binding domain^	-1.50624	1	1.46687	1	-1.18621	1	-1.14242	1	2.38609	1.90233e-05	10947.4	6580.14	8867.46	9479.08	7909.25	13987.2
E	At3g24140	^FAMA^BHLH097^ TF ^bHLH^bHLH^basic helix-loop-helix (bHLH) family protein contains Pfam profile: PF00010 Helix-loop-helix DNA-binding domain^	1.33942	1	1.2087	1	1.33375	1	1.61916	1	2.40147	0.0463954	35.5286	35.5439	36.4343	36.9515	86.487	237.589
C	At3g24225	^CLAVATA3/ESR-RELATED 19^protein binding activity^ ^CLE19, putative CLAVATA3/ESR-Related 19 (CLE19)^	1.35135	1	1.55679	0.0440813	1.21942	1	-1.20631	1	-1.56398	1	371.52	474.215	591.915	669.181	516.115	340.66
A	At3g24450	^ ^endomembrane system^ ^copper-binding family protein similar to copper homeostasis factor gi:3168840 from Arabidopsis thaliana; contains Pfam profile PF00403: Heavy-metal-associated domain^	-1.7529	1.60746e-06	-1.03318	1	1.21655	1	1.11921	1	-1.08442	1	6286.51	4467.17	3147.43	3052.23	4373.55	4710.33
A	At3g24520	^ ^AtHsfC1^ TF ^HSF^ ^heat shock transcription factor family protein contains Pfam profile: PF00447 HSF-type DNA-binding domain^	-1.50348	0.000589859	-1.00231	1	1.03301	1	-1.12991	1	-1.02351	1	1086.96	782.651	687.544	625.728	503.503	536.073
A	At3g24780	^ ^chloroplast^ ^hypothetical protein ^	-1.39259	0.0225908	-1.42424	1	1.02655	1	1.15269	1	-1.23364	1	374.82	303.44	221.386	170.752	166.98	141.879
D	At3g25130	^ ^ ^ ^expressed protein ^	1.67016	5.49245e-05	1.04816	1	1.19993	1	1.69155	0.0032531	1.17904	1	847.282	1321.19	1305.64	1774.27	2741.71	2934.38
D	At3g25240	^ ^ ^ ^hypothetical protein contains Pfam profile PF04720: Protein of unknown function (DUF506)^	1.05913	1	2.47809	5.45027e-15	1.81758	0.180852	1.13248	1	1.02655	1	177.626	211.135	562.355	1116.57	961.52	882.109
A	At3g25500	^FORMIN HOMOLOGY 1^actin binding activity^ ^formin homology 2 domain-containing protein / FH2 domain-containing protein contains formin homology 2 domain, Pfam:PF02181^	-1.52056	0.0161867	-1.03337	1	1.16807	1	1.00287	1	1.00136	1	9496.08	7034.31	7793.58	7901.54	6719.92	6848.81
A	At3g25640	^ ^ ^ ^expressed protein contains Pfam profile PF04759: Protein of unknown function, DUF617^	-2.09689	3.83786e-06	-1.95648	7.09316e-09	1.07795	1	-1.23577	1	-1.35876	0.78471	8319.59	4806.15	2900.99	2720.09	1791.76	1285.77
E	At3g25760	^ ^Acyl Lipid Metabolism;chloroplast^Allene Oxide Cyclase^early-responsive to dehydration stress protein (ERD12) nearly identical to early-responsive to dehydration (ERD12) protein [GI:15320414]; similar to allene oxide cyclase GI:8977961 from [Lycopersicon esculentum]; identical to cDNA ERD12 partial cds GI:15320413^	-1.02167	1	1.07397	1	1.33422	1	3.352	0.000204758	1.07544	1	80.7093	77.1222	86.7393	145.54	399.32	388.046
A	At3g26190	^ ^Cytochrome P450;cytochrome P450 activity^CYP71B^cytochrome P450 71B21, putative (CYP71B21) identical to Cytochrome P450 71B21 (SP:Q9LTM2) [Arabidopsis thaliana]; similar to cytochrome P450 GB:O65784 [Arabidopsis thaliana]^	-1.74666	4.11602e-09	-1.08749	1	1.09818	1	1.09582	1	1.06744	1	798.456	544.143	483.321	553.213	559.948	672.728
A	At3g26200	^ ^Cytochrome P450;cytochrome P450 activity^CYP71B^cytochrome P450 71B22, putative (CYP71B22) Identical to cytochrome P450 71B22 (SP:Q9LTM1)[Arabidopsis thaliana];contains Pfam profile: PF00067 cytochrome P450^	-2.84361	1.05884e-17	-1.42377	1	1.57327	6.44567e-05	-1.27587	1	1.04749	1	4992.02	2175.91	1594.43	1634.34	1471.92	1897.2
B	At3g26210	^ ^Cytochrome P450;cytochrome P450 activity^CYP71B^cytochrome P450 71B23, putative (CYP71B23) Identical to Cytochrome P450 71B23 (SP:Q9LTM0)[Arabidopsis thaliana];contains Pfam profile: PF00067 cytochrome P450^	2.20992	0.0131559	-1.78345	1	1.27229	1	-1.10431	1	-1.41075	1	73.8948	146.605	110.001	91.4115	92.7646	72.288
C	At3g26500	^ ^ ^ ^leucine-rich repeat family protein ^	2.2816	0.00978043	1.01077	1	1.03091	1	1.01588	1	-1.04674	1	110.765	218.385	243.982	215.703	213.524	244.501
D	At3g26510	^ ^ ^ ^octicosapeptide/Phox/Bem1p (PB1) domain-containing protein contains Pfam profile PF00564: PB1 domain^	-1.03511	1	-1.03483	1	1.3787	0.00027689	1.08245	1	1.03164	1	1141.49	1093.77	1373.17	2007.19	1811.25	1798.38
D	At3g26744	^INDUCER OF CBF EXPRESSION 1^BHLH116^ TF ^bHLH^bHLH^basix helix-loop-helix (bHLH) family protein contains Pfam profile: PF00010 helix-loop-helix DNA-binding domain^	1.10688	1	1.17696	1	1.48778	1	1.79995	1.46091e-05	-1.35078	1	7433.41	8469.33	8109.28	8528.95	10081.6	9367.02
E	At3g26800	^ ^ ^ ^expressed protein ^	1.16274	1	-1.48201	1	-1.05206	1	1.85546	1.05483e-05	1.38932	1	3591.13	4017.62	3298.44	3885.78	5000.1	5419.44
E	At3g26840	^ ^chloroplast^ ^esterase/lipase/thioesterase family protein contains Pfam profile PF03096: Ndr family^	-1.02144	1	1.00637	1	1.15115	1	1.42219	0.000500907	1.28164	1	321.472	299.799	292.191	380.555	508.818	646.207
E	At3g26960	^ ^endomembrane system^ ^expressed protein ^	1.30323	1	-1.01163	1	1.44487	1	2.35846	0.000339341	-1.26541	1	580.57	774.301	790.192	1091.28	2339.7	2889.51
B	At3g27100	^ ^ ^ ^expressed protein ^	-1.28712	1	-1.14979	1	-1.21204	1	-1.94537	4.85085e-09	-1.60488	7.52573e-09	5113.81	4451.21	3981.97	4031	2887.1	1849.74
B	At3g27560	^ ^ATN1-like Protein Kinase ;MAPKKK;protein amino acid phosphorylation^Raf subfamily^protein kinase (ATN1) almost identical (1 amino acid difference) to protein kinase ATN1 [Arabidopsis thaliana] gi|1054633|emb|CAA63387^	-1.00698	1	-1.06492	1	1.18106	1	1.05418	1	-1.70576	1.84587e-11	465.705	516.003	521.831	474.926	432.205	321.894
E	At3g27690	^ ^Chloroplast and Mitochondria gene families;chlorophyll binding activity^Chlorophyll a/b-binding protein family^chlorophyll A-B binding protein (LHCB2:4) nearly identical to Lhcb2 protein [Arabidopsis thaliana] GI:4741950; similar to chlorophyll A-B binding protein 151 precursor (LHCP) GB:P27518 from [Gossypium hirsutum]; contains Pfam PF00504: Chlorophyll A-B binding protein^	-1.09572	1	1.0891	1	1.04846	1	1.04325	1	2.2745	1.89865e-10	1045.98	909.379	941.456	1268.93	1294.25	2259.27
D	At3g28345	^ ^ABC(ATP-Binding Cassette);ABC transporters;ATP-binding cassette (ABC) transporter activity^P-glycoprotein-2^ABC transporter family protein similar to P-glycoprotein [Arabidopsis thaliana] GI:3849833; contains Pfam profiles PF00005: ABC transporter, PF00664: ABC transporter transmembrane region^	4.39294	1.50411e-27	1.87115	1	1.00701	1	1.13941	1	-1.42168	1	160.078	681.547	1086.74	1008.24	1369.47	1047.39
A	At3g28540	^ ^ ^ ^AAA-type ATPase family protein contains Pfam profile: ATPase family PF00004^	-1.99307	3.77749e-05	-1.28128	1	-1.11871	1	-1.35967	0.00581372	1.05515	1	4667.38	2566.03	2259.28	1985.79	1387.53	1379.46
A	At3g28560	^ ^ ^ ^hypothetical protein similar to mitochondrial protein-like protein (GI:11559424) [Cucumis sativus]^	-1.57792	1.77932e-06	-1.125	1	-1.14148	1	-1.57504	0.0149901	1.39096	1	1618.27	1217.58	928.757	729.665	559.073	588.944
A	At3g28570	^ ^mitochondrion^ ^AAA-type ATPase family protein contains Pfam profile: ATPase family PF00004^	-1.5684	1	-1.24333	1	-1.09806	1	-2.06198	7.85525e-05	-1.92482	4.82329e-07	2482.69	1717.89	1506.11	1458.57	821.483	451.866
A	At3g28650	^ ^DNA binding activity^ ^DC1 domain-containing protein similar to hypothetical protein GI:4204272 from [Arabidopsis thaliana] contains weak PHD zinc finger motifs contains weak PHD zinc finger motifs DC1 domain, a divergent protein kinase C domain of unknown function.^	-2.74631	0.00235794	-1.02328	1	1.0859	1	-1.14544	1	-1.00885	1	235.488	106.308	108.548	119.984	117.276	124.824
A	At3g28690	^ ^RLCK VII ;protein kinase activity^ ^protein kinase, putative similar to protein kinase APK1A [Arabidopsis thaliana] Swiss-Prot:Q06548^	-1.43863	0.0486092	-1.00859	1	1.03969	1	1.14716	1	1.52863	1	503.957	395.69	330.759	280.47	323.85	451.133
B	At3g28930	^AVRRPT2-INDUCED GENE 2^response to pathogenic bacteria^ ^avrRpt2-induced AIG2 protein (AIG2) identical to SP|P54121 AIG2 protein (avrRpt2-induced gene) {Arabidopsis thaliana}^	-1.22187	1	-1.65108	3.96191e-05	-1.13791	1	1.04558	1	-1.54888	1	4754.55	4685.85	3387.17	2745.89	2295.77	1582.55
A	At3g28990	^ ^endomembrane system^ ^hypothetical protein ^	-2.40071	6.21715e-10	-1.52752	1	1.02481	1	-1.31758	1	1.13968	1	388.715	227.345	145.155	195.047	143.564	125.994
E	At3g29030	^ARABIDOPSIS THALIANA EXPANSIN A5^ Assembly, Architecture, and Growth;Expansins;molecular_function unknown ^Growth modifying proteins;Alpha-Expansin Gene Family^expansin, putative (EXP5) identical to expansin At-EXP5 GB:AAB38071 from [Arabidopsis thaliana]; alpha-expansin gene family, PMID:11641069^	-1.01092	1	1.17801	1	1.77803	1.09007e-05	2.41222	1.35486e-21	1.30976	1	318.814	352.91	423.185	770.856	1769.14	2224.59
B	At3g29035	^ ^ANAC059^ TF ^NAC^ ^no apical meristem (NAM) family protein contains Pfam PF02365 : No apical meristem (NAM) protein; similar to cup-shaped cotyledon CUC2 (GI:1944132) [Arabidopsis thaliana]^	-1.16588	1	-1.19719	1	1.01185	1	-2.09826	2.79227e-06	1.07517	1	402.115	433.43	315.132	198.419	103.93	110.503
D	At3g29300	^ ^endomembrane system^ ^hypothetical protein ^	-1.03797	1	1.30457	1	1.70619	4.90121e-05	1.56742	1	-1.16324	1	851.28	822.879	963.451	1743.56	2467.52	2257.24
E	At3g29370	^ ^mitochondrion^ ^expressed protein ^	-1.36932	1	1.19758	1	1.27446	1	1.60927	3.738e-14	1.36173	1	3902.32	2751.19	2996.19	3986.18	5810.86	5650.34
E	At3g29590	^ ^acyltransferase activity^ ^transferase family protein similar to anthocyanin 5-aromatic acyltransferase from Gentiana triflora GI:4185599, malonyl CoA:anthocyanin 5-O-glucoside-6'''-O-malonyltransferase from Perilla frutescens GI:17980232, Salvia splendens GI:17980234; contains Pfam profile PF02458 transferase family^	-1.73945	1	-1.1217	1	1.22871	1	2.86906	6.33714e-33	1.55761	1	354.426	247.185	214.249	381.56	1093.03	1460.45
D	At3g29690	^ ^mitochondrion^ ^transferase-related similar to anthocyanin 5-aromatic acyltransferase from Gentiana triflora GI:4185599, malonyl CoA:anthocyanin 5-O-glucoside-6'''-O-malonyltransferase from Perilla frutescens GI:17980232, Salvia splendens GI:17980234^	1.59583	1	3.07511	1.27531e-20	1.53974	1	1.21653	1	-1.34383	1	1387.99	2731.34	7838.37	11226.8	12232.6	10604.2
B	At3g29810	^ ^GPI-anchored protein;Arabidopsis COBRA subfamily1;endomembrane system^COBRA^phytochelatin synthetase family protein / COBRA cell expansion protein COBL2 similar to phytochelatin synthetase [Hordeum vulgare subsp. vulgare] GI:29570314; identified in Roudier, et al, Plant Phys. (2002) 130:538-548 (PMID:12376623); contains Pfam profile PF04833: Phytochelatin synthetase-like conserved region^	1.17773	1	-1.03672	1	-1.06569	1	-1.47579	0.00106438	-1.11107	1	865.972	865.622	674.24	643.784	501.051	484.968
A	At3g29970	^ ^endomembrane system^ ^germination protein-related similar to HvB12D [Hordeum vulgare subsp. vulgare] gi|471319|emb|CAA54065^	1.27605	1	-1.87163	4.65763e-06	1.44133	1	-1.22126	1	-1.19528	1	1875.7	1591.38	955.305	1400.95	1157.7	722.86
B	At3g30140	AT3G30140_1 unknown protein contains non-consensus TG donor splice site at exon 1	-1.18144	1	1.09012	1	-1.55649	1	-1.15258	1	2.1081	0.00171539	381.936	388.407	427.191	269.684	347.613	388.635
D	At3g30180	^ ^BR biosynthesis;endomembrane system^brassinosteroid biosynthesis^cytochrome P450, putative similar to cytochrome P450 homolog (SP:U54770) [Lycopersicon esculentum]^	2.09848	9.90125e-22	1.0661	1	1.06139	1	1.49709	1	-1.33098	1	3645.98	7384.58	5719.19	5802.58	8191.42	7415.66
A	At3g30350	^ ^endomembrane system^ ^expressed protein ^	-2.18952	1.90817e-05	-1.95719	1	1.04119	1	-1.71922	1	-1.65201	1	383.613	199.221	112.406	113.124	69.0435	40.9166
E	At3g30775	^PROLINE OXIDASE^proline dehydrogenase activity;4-hydroxyproline degradation;arginine glutamate degradation^PROLINE DEHYDROGENASE^proline oxidase, mitochondrial / osmotic stress-responsive proline dehydrogenase (POX) (PRO1) (ERD5) nearly identical to SP|P92983 Proline oxidase, mitochondrial precursor (EC 1.5.3.-) (Osmotic stress- induced proline dehydrogenase) [Arabidopsis thaliana]; identical to…	-3.45641	0.000274071	1.10577	1	1.71324	1	1.60708	1	1.5574	1	3743.12	946.195	1365.14	2092.49	2775.95	3042.8
E	At3g32240	AT3G32240_1 unknown protein similar to putative PttA2-like transposon protein GB AAD25688 GI 4586071 from Arabidopsis thaliana	-1.0117	1	-1.23655	1	1.13962	1	1.32185	0.00816224	1.10115	1	4853.9	4714.09	4443.61	4669.89	5803.63	6574.75
B	At3g32917	At3g32917 retrotransposon gag protein family	1.08001	1	1.10348	1	1.21507	1	1.42545	1	-1.60131	0.0324462	2917.86	3890.44	2725.25	3921.21	3540.13	2586.65
A	At3g42670	^ ^Chromatin remodeling complex subunit R (SWI2/SNF2 homologs);nucleic acid binding activity^ ^SNF2 domain-containing protein / helicase domain-containing protein low similarity to SP|P41410 DNA repair protein rhp54 (RAD54 homolog) {Schizosaccharomyces pombe}; contains PFam profiles PF00271: Helicase conserved C-terminal domain, PF00176: SNF2 family N-terminal domain^	-1.81213	0.0138357	1.10024	1	-1.07651	1	1.05754	1	-1.0655	1	2160.47	1626.13	1460.69	1210.15	1452.28	1387.53
D	At3g43110	^ ^endomembrane system^ ^expressed protein ^	1.34116	1	3.69003	1.06952e-21	1.34366	1	-1.17033	1	-1.11418	1	176.086	260.938	774.024	1001.64	1254.09	1223.44
A	At3g43190	^ ^Glycosyltransferase Family 4;Glycosyltransferase Gene Families;glycosyltransferase;sucrose biosynthesis^Glycosyltransferase- Family 4;SUCROSE SYNTHASE^sucrose synthase, putative / sucrose-UDP glucosyltransferase, putative strong similarity to SP|P49040 Sucrose synthase (EC 2.4.1.13) (Sucrose-UDP glucosyltransferase) {Arabidopsis thaliana} (SUS1)^	-3.10922	7.10133e-05	-3.35855	0.00248162	-1.02823	1	-1.37499	1	1.30939	1	995.545	384.755	245.938	279.445	133.78	126.264
C	At3g43800	^ ^ ^ ^glutathione S-transferase, putative glutathione transferase, papaya, PIR:T09781^	-1.02346	1	1.83143	4.99814e-18	1.36228	0.159193	1.09395	1	-1.74064	4.36601e-06	3782.37	4263.76	8606.5	9453.53	8312.03	5705.62
B	At3g43810	^CALMODULIN 7^EF-hand containing proteins:Group IV;calcium ion binding activity^ ^calmodulin-7 (CAM7) almost identical to calmodulin GI:16227 from [Arabidopsis thaliana], SP|P59220 Calmodulin-7 {Arabidopsis thaliana}^	1.07077	1	1.01421	1	1.16567	1	1.06979	1	-1.60111	0.000390256	17679.1	17425.7	18295	15791.4	17238.9	14483.3
D	At3g43960	^ ^GPI-anchored protein;endomembrane system^Cys-Proteases^cysteine proteinase, putative contains similarity to cysteine proteinase RD21A (thiol protease) GI:435619, SP:P43297 from [Arabidopsis thaliana]^	-1.05375	1	1.96065	0.00133221	1.86588	0.7932	1.91119	6.97706e-08	-1.04623	1	571.165	596.485	959.699	1839.54	3199.66	3181.15
A	At3g44290	^ ^ANAC060^ TF ^NAC^ ^no apical meristem (NAM) family protein contains Pfam PF02365: No apical meristem (NAM) domain; NAC2 - Arabidopsis thaliana, EMBL:AF201456^	-3.7282	2.53165e-14	-1.59555	1	1.04873	1	-1.11575	1	1.23512	1	177.346	103.942	74.5162	75.1623	78.6679	76.4196
D	At3g44320	^NITRILASE 3^nitrilase activity;auxin biosynthesis^ ^nitrilase 3 (NIT3) identical to SP|P46010 Nitrilase 3 (EC 3.5.5.1) {Arabidopsis thaliana}^	1.21939	1	1.8134	0.004081	1.2626	1	-1.18368	1	-1.06507	1	1005.38	1178.17	1864.28	2444.61	1959.77	2200.29
C	At3g44500	^ ^peptidase activity^ ^Ulp1 protease family protein similar to At1g32840, At4g04010, At2g06430, At2g15140, At2g04980, At2g14130, At2g15190, At3g47260, At5g34900, At3g29210, At2g02210, At3g32900^	1.07157	1	2.02023	1.06238e-06	-1.11625	1	-1.16155	1	1.16559	1	471.271	419.309	585.473	594.87	519.503	520.889
D	At3g44510	^ ^ ^ ^expressed protein ^	1.09796	1	3.4687	7.56459e-19	1.46265	0.141197	1.21784	1	1.05274	1	120.771	142.243	438.67	583.639	724.178	677.096
E	At3g44770	^ ^mitochondrion^ ^hypothetical protein contains Pfam profile PF04776: Protein of unknown function (DUF626)^	1.1855	1	1.30377	0.52544	1.09408	1	1.66198	1.08663e-05	1.27924	1	848.684	1062.43	1081.38	1244.62	1974.21	2235.8
B	At3g44800	^ ^ ^ ^meprin and TRAF homology domain-containing protein / MATH domain-containing protein ^	1.1428	1	-1.23367	0.0230011	-1.09346	1	1.05696	1	-1.05212	1	375.781	451.782	422.418	379.861	362.967	334.586
E	At3g44960	^ ^ ^ ^expressed protein ; expression supported by MPSS^	1.175	1	-1.09696	1	1.01129	1	1.52823	0.00269841	1.03094	1	787.978	844.092	849.071	894.048	1165.38	1274.07
B	At3g45010	^ ^carboxypeptidase activity^ ^serine carboxypeptidase III, putative similar to serine carboxypeptidase III from Oryza sativa SP|P37891, Matricaria chamomilla GI:6960455, Hordeum vulgare SP|P21529, Triticum aestivum SP|P11515; contains Pfam profile PF0450 serine carboxypeptidase^	1.05937	1	1.14191	1	-1.31072	1	-1.41845	0.00105382	-1.57059	1	5555.43	6094.15	5952.53	4786.09	3833.48	2714.72
E	At3g45140	^LIPOXYGENASE 2^Acyl Lipid Metabolism;JA;chloroplast;lipoxygenase pathway^ Plastidial Lipoxygenase ;Involved in JA synthesis, Lipoxygenase ^lipoxygenase (LOX2) identical to SP|P38418^	-1.32698	1	-1.23854	1	1.27547	1	7.03848	7.88741e-30	3.54351	0	201.393	205.138	173.034	427.392	2492.78	9311.76
D	At3g45780	^NONPHOTOTROPIC HYPOCOTYL 1^IRE/NPH/Phosphoinositide dependent/Ribosomal Protein S6 ;phototropism^ ^protein kinase / nonphototropic hypocotyl protein 1 (NPH1) / phototropin identical to SP|O48963 Nonphototropic hypocotyl protein 1 (EC 2.7.1.37) (Phototropin) {Arabidopsis thaliana}, cDNA nonphototropic hypocotyl 1 (NPH1) GI:2832240; contains Pfam profiles PF00069:Protein kinase domain and PF00785:…	-1.8035	7.28585e-05	1.39051	1	1.19938	1	1.34395	1	-1.06657	1	2658.53	1675.81	2468.14	3023.98	3800.35	4055.81
E	At3g46670	^ ^Glycosyl transferases;Glycosyltransferase Family 1;glycosyltransferase^GT family 1^UDP-glucoronosyl/UDP-glucosyl transferase family protein contains Pfam profile: PF00201 UDP-glucoronosyl and UDP-glucosyl transferase^	1.64032	1	1.46158	1	1.51957	1	3.34247	1.41211e-12	1.94161	0.52402	49.9064	74.1254	90.9958	134.566	404.472	812.017
E	At3g46740	^ ^ ^ ^chloroplast outer envelope protein, putative similar to chloroplastic outer envelope membrane protein (OEP75) [Pisum sativum] GI:633607; contains Pfam profile PF01103: outer membrane protein, OMP85 family^	1.01579	1	1.27757	1	-1.43134	1	-1.12395	1	2.05186	4.09061e-21	5343.25	5239.27	5695.02	4509.44	4696.15	7317.62
E	At3g46770	^ ^B3 transcription factor family^ ^transcriptional factor B3 family protein contains Pfam profile PF02362: B3 DNA binding domain^	-1.03516	1	1.98547	0.52544	2.03489	1	2.01898	0.000884532	1.02171	1	100.057	96.8429	160.672	310.507	736.26	847.822
B	At3g46970	^ ^Glycosyltransferase Family 35;Glycosyltransferase Gene Families;glycosyltransferase^Glycosyltransferase Family- 35^starch phosphorylase, putative similar to alpha-glucan phosphorylase, H isozyme SP:P32811 from [Solanum tuberosum]^	-1.15431	1	-1.03136	1	-1.36774	0.0028446	-1.04517	1	1.17309	1	13539	11900.3	12105.3	9330.2	9960.25	10834.7
A	At3g47210	^ ^chloroplast^ ^expressed protein contains Pfam profile PF03140: Plant protein of unknown function^	-1.92849	1.15807e-05	-1.43904	1	-1.01774	1	-1.24887	1	1.28159	1	512.089	291.62	168.925	127.978	92.0233	116.157
D	At3g47295	^ ^endomembrane system^ ^expressed protein ^	-1.2542	1	-1.10198	1	1.41332	1	2.00706	0.000720446	-1.04328	1	9219.51	7572.78	8035.95	9413.26	9695.07	10240.4
A	At3g47470	^ ^chlorophyll binding activity^ ^chlorophyll A-B binding protein 4, chloroplast / LHCI type III CAB-4 (CAB4) identical to SP|P27521 Chlorophyll A-B binding protein 4, chloroplast precursor (LHCI type III CAB-4) (LHCP) {Arabidopsis thaliana}^	-2.02171	0.00139153	1.33471	1	1.38334	1	1.14685	1	-1.37168	1	27313.8	19401.7	21346.1	21284.4	18203	17368.2
A	At3g47950	^ ^P-ATPase;Primary Pumps (ATPases) Gene Families;ATPase activity^Plasma membrane H+-ATPase family^ATPase, plasma membrane-type, putative / proton pump, putative strong similarity to P-type H(+)-transporting ATPase from Nicotiana plumbaginifolia [SP|Q08435, SP|Q08436], Lycopersicon esculentum [GI:5901757, SP|P22180], Solanum tuberosum [GI:435003]; contains InterPro accession IPR001757: ATPase, E1…	-1.26645	1	-1.2856	0.043819	-1.27422	1	1.42987	0.78531	1.53711	1	503.037	450.302	342.656	296.066	393.786	581.326
B	At3g47960	^ ^POT(Proton-dependent Oligopeptide Transporter);Organic Solute Cotransporters;transporter activity^Similar to LeOPT1 family^proton-dependent oligopeptide transport (POT) family protein contains Pfam profile: PF00854 POT family^	-1.12807	1	1.01301	1	-1.17702	1	-1.09938	1	1.57463	0.0198347	1924.79	1953.29	2175.59	1743.71	1701.18	2048.6
E	At3g48460	^ ^lipase activity;glycerol biosynthesis^LIPASE^GDSL-motif lipase/hydrolase family protein similar to lipase [Arabidopsis thaliana] GI:1145627; contains InterPro Entry IPR001087 Lipolytic enzyme, G-D-S-L family^	1.62363	1	1.29521	1	1.36513	1	-1.0171	1	1.77071	4.51771e-19	213.532	322.899	402.435	483.231	546.851	1046.65
C	At3g48620	^ ^ ^ ^chloroplast outer membrane protein-related weak similarity to chloroplastic outer envelope membrane protein (OEP75) [Pisum sativum] GI:633607^	-1.03454	1	-1.17735	1	1.00753	1	1.12467	1	1.48822	0.00167834	406.355	422.277	446.12	448.523	463.208	509.476
B	At3g48640	^ ^endomembrane system^ ^expressed protein ^	1.57328	1	-2.3397	0.0149989	-1.00025	1	1.08058	1	1.65701	1	492.434	680.379	293.413	250.937	197.429	264.745
A	At3g48660	^ ^endomembrane system^ ^hypothetical protein ^	-1.19924	1	-1.22364	1	-1.13597	1	1.35062	1	-1.88891	0.00010018	4963.09	3656.89	2856.27	3227.2	3179.93	2285.29
A	At3g48670	^ ^putative transcription regulator^ ^XH/XS domain-containing protein / XS zinc finger domain-containing protein contains Pfam domains PF03469: XH domain, PF03468: XS domain and PF03470: XS zinc finger domain^	-1.48124	1	-1.88716	0.00127122	1.00428	1	-1.01827	1	1.18028	1	1066.32	909.259	890.226	866.826	828.811	749.951
A	At3g48740	^ ^MTN3-like protein family;molecular_function unknown^ ^nodulin MtN3 family protein similar to MtN3 GI:1619602 (root nodule development) from [Medicago truncatula]^	-1.52373	0.00281207	-2.00048	0.003313	1.19467	1	-1.34284	1	1.16594	1	1282.59	1112.53	500.892	517.013	399.12	427.676
A	At3g49110	^ ^Class III peroxidase;endomembrane system^ ^peroxidase 33 (PER33) (P33) (PRXCA) / neutral peroxidase C (PERC) identical to SP|P24101 Peroxidase 33 precursor (EC 1.11.1.7) (Atperox P33) (ATPCa) (Neutral peroxidase C) (PERC) {Arabidopsis thaliana}^	-3.29801	2.7743e-19	-1.2864	1	1.01505	1	1.02183	1	-1.03572	1	988.115	389.761	261.22	195.272	205.729	227.083
A	At3g49120	^PROLINE OXIDASE^Class III peroxidase;endomembrane system^ ^peroxidase, putative identical to peroxidase [Arabidopsis thaliana] gi|405611|emb|CAA50677^	-2.84086	0.51916	-2.49131	1.68326e-09	1.53323	1	-1.08004	1	2.87853	1	6565.93	1848.89	1080.5	1647.01	819.003	2716.24
B	At3g49210	^ ^Acyl Lipid Metabolism^Bifunctional Wax Ester Synthase / DAGAT^expressed protein ^	1.01259	1	1.45703	4.22765e-05	-1.05071	1	-1.16816	1	1.03937	1	367.853	373.515	402.903	389.156	402.307	389.205
D	At3g49260	^ ^ ^ ^calmodulin-binding family protein low similarity to SF16 protein [Helianthus annuus] GI:560150; contains Pfam profile PF00612: IQ calmodulin-binding motif^	3.22309	1.33226e-10	1.18169	1	-1.0282	1	1.07092	1	1.28635	1	177.179	716.001	1048.88	999.759	1070.6	1331.29
D	At3g49570	^ ^ ^ ^expressed protein ^	-2.77283	1	-1.01291	1	2.32836	0.000217809	-1.36867	0.199884	-1.69818	1	1384.3	878.634	963.123	2155.53	1749.89	1005.37
E	At3g49670	^ ^LRR XI & LRR XII ;endomembrane system^ ^leucine-rich repeat transmembrane protein kinase, putative CLAVATA1 receptor kinase, Arabidopsis thaliana, EMBL:ATU96879^	-1.09195	1	1.18683	1	1.07406	1	1.25799	0.26246	1.45007	0.00100022	8150.62	7744.63	8248.62	10078.1	15038.1	16256.4
B	At3g49680	^ ^transaminase activity^ ^branched-chain amino acid aminotransferase 3 / branched-chain amino acid transaminase 3 (BCAT3) identical to SP|Q9M401 Branched-chain amino acid aminotransferase 3, chloroplast precursor (EC 2.6.1.42) (Atbcat-3){Arabidopsis thaliana}^	-1.31715	0.039228	1.2729	1	1.32437	1	-1.17972	1	-1.04287	1	6354.85	5377.66	6498.98	6272.87	5369.14	5247.21
B	At3g49760	^ ^AtbZIP5^ TF ^bZIP^ ^bZIP transcription factor family protein similar to bZIP transcription factor GI:1769891 from [Arabidopsis thaliana]^	3.01072	0.51916	1.694	1	-1.3832	1	-1.10175	1	-2.03245	2.82554e-07	145.44	396.224	442.294	251.238	202.504	163.899
D	At3g50170	^ ^molecular_function unknown^ ^hypothetical protein contains Pfam profile PF03140: Plant protein of unknown function^	-1.89502	1	1.34851	1	1.52021	0.177688	1.28704	1	1.44922	5.38754e-08	320.961	195.48	447.295	742.545	874.222	1097.77
E	At3g50270	^ ^chloroplast^ ^transferase family protein similar to anthranilate N-hydroxycinnamoyl/benzoyltransferase, Dianthus caryophyllus [gi:2239091]; contains Pfam transferase family domain PF002458^	-2.22255	2.38367e-16	1.12925	1	1.19435	1	1.06739	1	1.34235	1	720.871	376.95	396.807	549.456	632.7	923.704
A	At3g50280	^ ^ ^ ^transferase family protein similar to anthranilate N-hydroxycinnamoyl/benzoyltransferase, Dianthus caryophyllus, PIR:T10717 [gi:2239091]; contains Pfam transferase family domain PF002458^	-1.90896	1.3189e-06	-1.06628	1	1.20173	1	1.02258	1	1.19665	1	1938.56	1250.46	1067.26	1160.62	1052.71	1231.65
B	At3g50630	^Kip-related protein 2^Core Cell Cycle Genes;cyclin-dependent protein kinase inhibitor activity^ ^kip-related protein 2 (KRP2) / cyclin-dependent kinase inhibitor 2 (ICK2) / cdc2a-interacting protein identical to Cdc2a-interacting protein (ICK2) (cyclin-dependent kinase inhibitor) [Arabidopsis thaliana] GI:7160669^	1.06668	1	1.00503	1	-1.12115	1	-1.61725	4.38603e-06	-1.53418	0.0212568	5624.99	5912.43	3996.49	4294.05	4213.69	2659.68
A	At3g50740	^ ^Glycosyl transferases;Glycosyltransferase Family 1;glycosyltransferase^GT family 1^UDP-glucoronosyl/UDP-glucosyl transferase family protein contains Pfam profile: PF00201 UDP-glucoronosyl and UDP-glucosyl transferase^	-1.40857	0.0133389	-1.18724	1	1.25535	1	1.13235	1	1.00071	1	736.027	552.143	389.194	403.942	425.792	454.813
E	At3g50800	^ ^ ^ ^expressed protein ^	1.47659	1	-1.41519	1	1.02184	1	1.72492	0.00168595	1.59623	1	510.709	609.439	411.126	318.458	609.768	906.661
A	At3g50930	^ ^endomembrane system^ ^AAA-type ATPase family protein contains Pfam profile: ATPase family PF00004^	1.06129	1	-2.05029	1.67098e-11	-1.69471	1	-1.40705	1	-1.31929	1	546.623	402.895	359.194	222.709	154.121	121.198
E	At3g51240	^TRANSPARENT TESTA 6^flavonoid biosynthesis^FLAVANONE 3-HYDROXYLASE^naringenin 3-dioxygenase / flavanone 3-hydroxylase (F3H) identical to GI:3790548^	-1.60393	1	1.84433	3.09198e-08	1.16257	1	-1.09943	1	1.07891	1	15792.7	12041.2	18150.1	18433.8	15169.6	22236.3
C	At3g51660	^ ^ ^ ^macrophage migration inhibitory factor family protein / MIF family protein contains Pfam profile: PF01187 Macrophage migration inhibitory factor family(MIF)^	7.2407	0	-1.03813	1	1.06666	1	1.01497	1	-1.02125	1	357.678	2407.82	2690.8	2858.22	2530.16	2212.61
A	At3g51860	^CAX3^CaCA( Ca2+:Cation Antiporter);Antiporters;vacuolar membrane (sensu Magnoliophyta)^Low affinity calcium antiporter CAX2 family^cation exchanger, putative (CAX3) similar to high affinity calcium antiporter CAX1 [Arabidopsis thaliana] gi|9256741|gb|AAB05913; Ca2+:Cation Antiporter (CaCA) Family member PMID:11500563; non-consensus AT-acceptor splice site at intron 1^	-1.80507	9.02641e-05	1.29198	1	-1.06445	1	-1.19206	1	1.62384	1	3914.82	2333.08	2633.61	2658.79	2424.73	3558.64
D	At3g51895	^SULFATE TRANSPORTER 1^sulfate porter activity^ ^sulfate transporter (ST1) identical to sulfate transporter [Arabidopsis thaliana] GI:2285885^	1.28196	1	-1.07734	1	1.07777	1	1.43216	6.41903e-08	1.07214	1	1899.37	2126.73	2539.81	3172.68	3992.38	4715.72
B	At3g52410	^ ^mitochondrion^ ^hypothetical protein contains Pfam profile PF03778: Protein of unknown function (DUF321)^	1.15339	1	1.03385	1	-1.05305	1	-1.83765	1.71025e-06	1.12336	1	1443.64	2270.76	1732.73	1359.31	1075.63	1064.9
E	At3g52480	^ ^endomembrane system^ ^expressed protein ^	-1.74011	7.66541e-12	-1.21641	1	1.41483	1	1.4339	1	1.09078	1	1084.65	686.582	640.015	847.21	1147.23	1453.47
C	At3g52580	^ ^ ^ ^40S ribosomal protein S14 (RPS14C) ribosomal protein S14 -Zea mays,PIR2:A30097^	-1.42529	1	1.15223	1	-1.03194	1	-2.38398	0.0118563	1.1149	1	21891.9	18549.1	25679.5	22829.8	20514.5	15723.5
B	At3g52590	^EMBRYO DEFECTIVE 2167^EMB;ribosome^Embryo Defective^ubiquitin extension protein 1 (UBQ1) / 60S ribosomal protein L40 (RPL40B) identical to GI:166929, GI:166930^	-3.49613	7.03138e-13	-1.26922	1	-1.17162	1	-1.55415	1	-1.50802	1	20529.9	15115.3	19981.2	17467.6	12350.2	12064.4
E	At3g52840	^ ^ b-galactocidase;Glycoside Hydrolase Family 35;Hydrolases;Glycoside Hydrolase Gene Families;lactose catabolism;galactose, galactoside and glucose catabolism;lactose degradation 4;lactose degradation 2;lactose degradation 3 ^Exo-acting glucanases;Glycoside Hydrolase Family 35;BETA-GALACTOSIDASE^beta-galactosidase, putative / lactase, putative similar to beta-galactosidase precursor GI:3869280 f…	-1.41658	1	-1.23265	1	1.29527	1	4.12192	2.6658e-09	1.87346	0.0456063	77.484	62.8048	60.2911	71.478	255.101	543.831
C	At3g53140	^ ^ ^ ^O-diphenol-O-methyl transferase, putative similar to GI:6688808 [Medicago sativa subsp. x varia], caffeic acid O-methyltransferase (homt1), Populus kitakamiensis, EMBL:PKHOMT1A^	2.0904	1.25067e-11	1.05676	1	-1.20846	1	-1.12408	1	1.05599	1	3847.32	7844.66	7646.68	6516.15	6100.8	6045.1
A	At3g53280	^CYTOCHROME P450 71B5^Cytochrome P450;cytochrome P450 activity^CYP71B^cytochrome P450 71B5 (CYP71B5) Identical to Cytochrome P450 71B5 (SP:O65784) [Arabidopsis thaliana]^	-1.74256	7.47938e-12	1.008	1	1.11573	1	1.22088	1	-1.30319	1	2542.27	1508.77	1425.98	1248.67	1388.01	1293.15
E	At3g53310	^ ^B3 transcription factor family;endomembrane system^ ^transcriptional factor B3 family protein contains Pfam profile PF02362: B3 DNA binding domain^	-1.47675	1	1.2182	1	1.36461	0.011662	1.15526	1	2.24664	0	1746.87	1568.65	1960.22	2569.77	3173.04	7187.28
A	At3g53530	^ ^chloroplast^ ^heavy-metal-associated domain-containing protein low similarity to gi:3168840 copper homeostasis factor; contains Pfam heavy-metal-associated domain PF00403^	-1.66009	0.0059049	1.00623	1	1.37521	1	1.28411	0.241772	-1.11836	1	2227.88	1806.71	1752.69	2141.71	2189.53	2284.22
D	At3g53560	^ ^ ^ ^chloroplast lumen common family protein ^	-1.10562	1	1.75218	7.23434e-12	1.35284	1	-1.21512	1	1.06046	1	2529.93	2213.29	3744.93	4141.48	4032.15	3982.14
B	At3g53760	^ ^ ^ ^tubulin family protein similar to SP|Q9SC88 Gamma-tubulin complex component 4 homolog {Medicago truncatula}, SP|Q9UGJ1|GCP4_HUMAN Gamma-tubulin complex component 4 {Homo sapiens}; contains Pfam profile PF04130: Spc97 / Spc98 family^	1.04183	1	1.03395	1	-1.29458	1	-1.23449	1	1.69182	5.22262e-07	2953.74	3096.11	3177.95	2492.12	2197.08	2844.17
C	At3g53950	^ ^endomembrane system^ ^glyoxal oxidase-related contains similarity to glyoxal oxidase precursor [Phanerochaete chrysosporium] gi|1050302|gb|AAA87594^	1.12293	1	1.39907	1	-1.10382	1	-1.01201	1	-1.53055	1.51838e-08	879.517	1243.36	1656.2	1800.44	1795.03	1240.72
B	At3g54110	^UNCOUPLING PROTEIN^MC(Mitochondrial Carrier);Uncoupling protein family;uncoupling protein activity^ ^plant uncoupling mitochondrial protein (PUMP) identical to plant uncoupling mitochondrial protein [Arabidopsis thaliana] GI:3115108^	-1.12901	1	-1.18703	1	1.05128	1	-1.00125	1	-1.34435	1.12581e-05	13587.1	12881.4	11970.7	11565	10856.4	8828.57
E	At3g54140	^ ^POT(Proton-dependent Oligopeptide Transporter);Organic Solute Cotransporters;transporter activity^Similar to LeOPT1 family^proton-dependent oligopeptide transport (POT) family protein contains Pfam profile: PF00854 POT family^	-1.54441	4.1605e-07	-1.28524	1	1.46451	1	2.32996	4.86759e-40	1.1722	1	649.612	434.193	297.722	331.558	749.515	929.822
C	At3g54210	^ ^structural constituent of ribosome^ ^ribosomal protein L17 family protein contains Pfam profile: PF01196 ribosomal protein L17^	1.01337	1	1.36699	1	1.24849	1	1.4667	0.00359666	-1.13013	1	8019.47	9044.54	9469.6	9780.12	10220.5	10372.7
C	At3g54340	^APETALA3^ ^ TF ^MADS^Type II (MIKCc)^floral homeotic protein APETALA3 (AP3) ^	9.61764	7.7314e-16	7.53982	2.69882e-16	1.20598	1	-1.33767	1	-1.73281	1	1383.43	9415	20262.6	18423	14455	10959
B	At3g54350	^EMBRYO DEFECTIVE 1967^FHA transcription factor;EMB^Embryo Defective^forkhead-associated domain-containing protein / FHA domain-containing protein MSP58 - nucleolar protein, Mus musculus, EMBL:AF015309^	-1.10285	1	1.02398	1	-1.15431	1	1.11704	1	1.38135	0.00500321	7248.94	6416.47	6115.61	5177.9	5151.7	6246.44
A	At3g54530	^ ^ ^ ^hypothetical protein ^	-1.1701	1	-1.74667	0.014445	-1.09534	1	-1.2738	1	-1.14027	1	3056.49	2810.81	1708.92	1493.46	1385.91	1179.38
A	At3g54780	^ ^mitochondrion^ ^zinc finger (C3HC4-type RING finger) family protein low similarity to SP|P79263 Inter-alpha-trypsin inhibitor heavy chain H4 precursor {Sus scrofa}; contains Pfam profiles PF00097: Zinc finger, C3HC4 type (RING finger), PF00092: von Willebrand factor type A domain^	-1.04431	1	-1.06059	1	-1.07658	1	-1.14211	1	-1.44859	0.000259727	1766.27	1643.72	1374.85	1388.06	1305.07	1154.54
D	At3g54810	^ ^ ^ TF ^GATA (Zn)^ ^zinc finger (GATA type) family protein GATA transcription factor 3, Arabidopsis thaliana, Y13650^	-1.08151	1	1.16098	1	1.25845	1	-1.01246	1	1.49954	0.0311308	1954.42	1867.89	2283.67	2926.22	3189.31	3844.8
C	At3g54960	^ ^isomerase activity^ ^thioredoxin family protein similar to protein disulfide isomerase GI:5902592 from [Volvox carteri f. nagariensis], GI:2708314 from Chlamydomonas reinhardtii; contains Pfam profile: PF00085 Thioredoxin^	1.31441	0.0106703	1.31402	1	1.06199	1	1.10498	1	-1.02628	1	6969.38	8178.11	9288.76	9510.8	9651.01	9718.56
E	At3g55130	^ ^ABC(ATP-Binding Cassette);ABC Superfamily;ABC transporters;ATP-binding cassette (ABC) transporter activity^WBC subfamily;Putative ABC transporter^ABC transporter family protein breast cancer resistance protein 1 BCRP1, Mus musculus, EMBL:NP_036050^	-1.3143	1	1.32812	1	2.2	0.52922	2.29479	0.00517989	1.15245	1	1008.24	733.263	825.672	1680.1	3405.83	3928.56
C	At3g55290	^ ^Acyl Lipid Metabolism;SDRs (short-chain dehydrogenase/reductase family);metabolism^Plastidial Ketoacyl-ACP Reductase^short-chain dehydrogenase/reductase (SDR) family protein contains similarity to 3-oxoacyl-[acyl-carrier protein] reductase SP:P51831 from [Bacillus subtilis]^	1.72562	1	1.29424	1	-1.07583	1	1.51021	1	2.22057	7.44268e-05	272.139	498.212	507.731	423.61	433.003	541.78
C	At3g55660	^ ^chloroplast^ ^expressed protein contains Pfam profile PF03759: Domain of unknown function (DUF315)^	1.12321	1	1.5077	1.29442e-10	1.06425	1	1.09472	1	-1.48187	1	5195.3	5199.33	5427.91	5576.91	7123.68	5432.67
E	At3g56220	^ ^ bHLH,Basic Helix-Loop-Helix family ^ ^expressed protein ^	-1.41663	0.00433273	1.40146	1	1.57274	0.126116	3.98998	2.55527e-10	1.32107	1	1871.29	1545.1	1848.23	2490.08	7045.65	7536.56
E	At3g56260	^ ^ ^ ^expressed protein ^	1.10251	1	-1.47654	1	1.17409	1	1.64284	1	3.74523	8.22914e-13	103.374	112.517	85.518	96.9353	265.013	1269.58
B	At3g56300	^ ^amino acid activation^CYSTEINE-TRNA LIGASE^tRNA synthetase class I (C) family protein similar to cysteinyl-tRNA synthetase [Methanococcus maripaludis] GI:6599476; contains Pfam profile PF01406: tRNA synthetases class I (C)^	1.04322	1	1.01815	1	1.2029	1	1.09276	1	-1.40952	0.0209936	1209.23	1558.52	1420.73	1345.84	1258.99	1205.12
B	At3g56360	^ ^chloroplast^ ^expressed protein unknown protein 110K5.12 - Sorghum bicolor, TREMBL:AF124045_5^	2.00693	1.33487e-10	-2.30005	0.00461048	1.06217	1	-1.07773	1	-1.14069	1	2142.17	3205.51	1639.76	1979.62	1953.72	1930.52
A	At3g56400	^ ^AtWRKY70^ TF ^WRKY^ ^WRKY family transcription factor DNA-binding protein 4 WRKY4 - Nicotiana tabacum, EMBL:AF193771^	-1.86484	1.55702e-05	-1.22036	1	1.07889	1	1.01791	1	1.19829	1	9635.84	6046.74	4130.4	4535.23	4066.55	5078.54
A	At3g57170	^ ^mitochondrion^ ^N-acetylglucosaminyl transferase component family protein / Gpi1 family protein similar to SP|O14357 N-acetylglucosaminyl-phosphatidylinositol biosynthetic protein gpi1 {Schizosaccharomyces pombe}; contains Pfam profile PF05024: N-acetylglucosaminyl transferase component (Gpi1)^	-1.05431	1	1.01753	1	1.12194	1	-1.18266	1	1.34093	0.0287651	3996.86	3867.32	2888.91	2982	3091.82	3866.12
C	At3g57200	^ ^chloroplast^ ^hypothetical protein ^	1.08979	1	1.11346	1	1.07341	1	1.18708	1	-1.54526	0.0070119	1037.78	1077.91	1188.19	1348.89	1198.66	865.739
E	At3g57600	^ ^ ^ TF ^AP2/ERF^ERF-EREBP^AP2 domain-containing transcription factor, putative various proteins containing an AP2 transcription factor domain, Arabidopsis thaliana^	1.1777	1	-1.05613	1	1.1796	1	2.13281	5.26463e-22	2.27058	4.82781e-08	187.065	209.724	192.261	289.627	747.076	1336.7
C	At3g57720	^ ^Wall Associated Kinase ;protein kinase activity^ ^protein kinase, putative contains protein kinase domain, Pfam:PF00069^	3.66905	3.4199e-28	-1.28557	1	-1.11454	1	-1.13175	1	-1.22879	1	223.307	724.761	805.53	866.428	580.809	714.186
D	At3g57780	^ ^chloroplast^ ^expressed protein ^	-2.24536	2.61731e-20	-1.60251	1	1.03186	1	1.22669	1	1.83296	1	73.9438	71.1797	69.5216	181.28	231.721	142.722
B	At3g57810	^ ^chloroplast^ ^OTU-like cysteine protease family protein contains Pfam profile PF02338: OTU-like cysteine protease^	1.59798	4.09386e-05	-1.51067	1	1.03486	1	1.03277	1	1.05349	1	1013.66	1274.45	991.371	925.483	955.199	929.315
D	At3g58210	^ ^chloroplast^ ^meprin and TRAF homology domain-containing protein / MATH domain-containing protein similar to ubiquitin-specific protease 12 [Arabidopsis thaliana] GI:11993471; contains Pfam profile PF00917: MATH domain^	-1.46803	1	2.52988	6.48625e-05	2.04265	1.73465e-08	1.12616	1	-1.51536	1	835.591	656.434	1895.29	3290.37	3618.37	2837.13
E	At3g58220	^ ^ ^ ^meprin and TRAF homology domain-containing protein / MATH domain-containing protein weak similarity to ubiquitin-specific protease 12 [Arabidopsis thaliana] GI:11993471; contains Pfam profile PF00917: MATH domain^	-1.05617	1	1.17342	1	-1.08084	1	1.19867	1	1.36868	5.87529e-05	2643.92	2610.47	2432.47	2232.47	2676.11	3465.3
B	At3g58760	^ ^Ankyrin Repeat Domain Protein Kinase ;MAPKKK;mitochondrion^Raf subfamily^ankyrin protein kinase, putative similar to ankyrin-kinase [Medicago truncatula] gi|18700701|gb|AAL78674^	-1.19843	1	-1.37774	0.00192012	-1.10536	1	1.0146	1	1.09112	1	4277.46	3822.81	3497.38	3133.21	3243.05	3130.98
B	At3g58770	^ ^ ^ ^expressed protein ; expression supported by MPSS^	-1.09477	1	-1.41017	0.000963511	-1.18456	1	-1.30775	1	-1.30321	1	10584.3	10482.4	8355.63	6875.31	5652.96	4621.95
E	At3g59080	^ ^endomembrane system^ ^aspartyl protease family protein contains similarity to CND41, chloroplast nucleoid DNA binding protein (GI:2541876) [Nicotiana tabacum]; contains Pfam profile PF00026: Eukaryotic aspartyl protease^	-1.00841	1	-1.13778	1	1.17266	1	1.55688	1.78095e-09	1.11824	1	519.458	444.433	310.439	343.705	523.915	759.475
B	At3g59200	^ ^F-box (FBX);nucleic acid binding activity^B7^F-box family protein contains F-box domain Pfam:PF00646^	1.08922	1	1.07447	1	1.02662	1	-1.37153	0.0247906	1.12206	1	1183.61	1298.81	1285.17	1074.15	881.948	855.113
B	At3g59210	^ ^F-box (FBX)^B7^F-box family protein contains F-box domain Pfam:PF00646^	1.00277	1	-1.43667	0.00429284	-1.31714	1	-1.09474	1	-1.20377	1	6792.11	7033.5	5849.86	5012.22	4696.73	3982.14
A	At3g59270	^ ^EF-hand containing proteins:Group I;calcium ion binding activity^ ^syntaxin-related family protein contains a novel domain similar to F-box that is shared among other proteins in Arabidopsis; similar to proteins At1g56610, At3g54160, At1g47920 (syntaxin SYP81), At5g41830, At3g44180, At1g48390, At3g59270 [Arabidopsis thaliana]^	-1.79695	0.00904728	-1.88955	1.46109e-13	1.13033	1	-1.52802	0.120468	-1.26929	1	1546.16	1393.32	524.79	534.138	404.924	406.238
B	At3g59320	^ ^endomembrane system^ ^integral membrane protein, putative contains Pfam profile PF00892: Integral membrane protein; identical to anthocyanin-related membrane protein 2 (GI:16416385) [Arabidopsis thaliana]^	-1.07351	1	-1.47913	0.0144191	-1.19652	1	-1.09635	1	1.02476	1	6417.94	6266.45	3849.26	3319.89	3434.74	3053.59
B	At3g59380	^PLURIPETALA^C-terminal protein prenylation^ ^farnesyltransferase alpha subunit, putative / FTA, putative / protein farnesyltransferase, putative similar to farnesyltransferase alpha subunit [GI:2246442][Pisum sativum]^	-1.07108	1	1.25215	1	1.03082	1	-1.33957	1	1.76567	9.79817e-10	2294.79	1966.05	2193.84	2037.97	1613.94	1970.02
E	At3g59530	^ ^endomembrane system^ ^strictosidine synthase family protein similar to strictosidine synthase [Rauvolfia serpentina][SP|P15324]^	1.19366	1	1.06524	1	1.35725	1	1.59629	0.00203477	1.20869	1	726.175	883.507	923.925	1123.65	1869.45	2214.26
B	At3g59690	^ ^ ^ ^calmodulin-binding family protein similar to SF16 protein [Helianthus annuus] GI:560150; contains Pfam profile PF00612: IQ calmodulin-binding motif^	1.31832	1	1.01524	1	-1.01009	1	-1.67064	0.0123839	-1.23117	1	469.605	644.725	694.026	737.558	421.61	314.116
A	At3g59845	^ ^ ^ ^NADP-dependent oxidoreductase, putative similar to probable NADP-dependent oxidoreductase (zeta-crystallin homolog) P1 [SP|Q39172][gi:886428] and P2 [SP|Q39173][gi:886430], Arabidopsis thaliana; allyl alcohol dehydrogenase - Nicotiana tabacum, EMBL:AB036735^	-2.1785	9.46803e-06	-1.56721	1	-1.37682	1	-1.26064	1	-1.06457	1	1357.26	613.633	406.561	326.197	239.191	230.85
D	At3g60160	^ ^ABC(ATP-Binding Cassette);ABC Superfamily;ABC transporters;ATP-binding cassette (ABC) transporter activity^MRP subfamily;ABC transporter-like^ABC transporter family protein similar to ATP-binding cassette transporter MRP8 GI:18031899 from [Arabidopsis thaliana]^	-1.04367	1	1.13504	1	1.0134	1	1.3634	0.000171623	1.38993	1	410.377	442.611	580.152	707.289	868.202	1010.1
B	At3g60640	^ ^ ^ ^autophagy 8g (APG8g) identical to autophagy 8g [Arabidopsis thaliana] GI:19912163; contains Pfam profile PF02991: Microtubule associated protein 1A/1B, light chain 3; supporting cDNA gi|19912162|dbj|AB073181.1|^	-1.00087	1	-1.29089	0.00307481	1.13303	1	-1.20637	1	-1.26546	1	6391.31	6575.82	5606.79	5840.99	5394.04	4744.49
C	At3g60670	^ ^ ^ TF ^PLATZ (Zn)^ ^zinc-binding protein, putative similar to zinc-binding protein [Pisum sativum] GI:16117799; contains Pfam profile PF04640 : Protein of unknown function, DUF597^	1.62059	2.27148e-08	1.02024	1	-1.23941	1	1.05606	1	-1.03201	1	745.524	1166.65	1229.27	1100.89	983.106	891.758
B	At3g60890	^ ^chloroplast^ ^hypothetical protein ^	1.40779	1	-1.89657	1	-1.00672	1	-1.13545	1	-1.6141	0.00658929	2096.22	2947.95	2031.26	1867.46	1302.97	797.911
D	At3g60930	^ ^chloroplast^ ^expressed protein ^	1.24086	1	1.47977	0.00230407	1.30452	1	1.59223	0.00430907	1.34276	1	957.14	1358.47	1558.56	1913.97	2751.52	3108.39
B	At3g60960	^ ^ ^ ^pentatricopeptide (PPR) repeat-containing protein contains Pfam profile PF01535: PPR repeat^	-1.05178	1	-1.65261	0.000130749	-1.79463	0.0665426	-1.36548	1	-1.07999	1	742.668	876.617	624.963	364.09	311.376	255.324
B	At3g61150	^ ^ ^ TF ^HB^HD-Zip IV / HD ZLZ START^homeobox-leucine zipper family protein / homeodomain GLABRA2 like protein 1 (HD-GL2-1) similar to Anthocyaninless2 (ANL2) (GP:5702094) Arabidopsis thaliana, EMBL:AF077335^	1.2691	1	1.15128	1	1.09822	1	-1.31652	1	2.24313	6.6845e-23	1387.55	1800.99	1745.14	1564.86	1551	2083.06
B	At3g61250	^ ^AtMYB17^ TF ^MYB-(R1)R2R3^ ^myb family transcription factor (MYB17) contains PFAM profile: Myb-like DNA-binding domain PF00249^	-1.20678	1	1.29043	1	1.22656	1	-1.49955	0.0144122	-1.13208	1	16283.7	13968.3	14653.2	15379.1	12108.5	10610.8
B	At3g61420	^ ^General Transcription^ ^transcription factor-related low similarity to SP|Q9DBA9 TFIIH basal transcription factor complex p62 subunit {Mus musculus}; contains Pfam profile PF03909: BSD domain^	-1.07655	1	1.011	1	-1.0204	1	-1.20449	1	1.48004	0.0287651	1447.7	1408.22	1479.3	1284.53	1058.21	1378.35
D	At3g61490	^ ^Glycoside Hydrolase Family 28;Glycoside Hydrolase Gene Families;endomembrane system^Glycoside Hydrolase Family 28^glycoside hydrolase family 28 protein / polygalacturonase (pectinase) family protein weak similarity to SP|P27644 Polygalacturonase (EC 3.2.1.15) (Pectinase) {Agrobacterium tumefaciens}; contains PF00295: Glycosyl hydrolases family 28^	-1.46018	0.0246045	1.12282	1	1.25918	1	-1.04516	1	1.30395	1	7195.29	5066.31	6616.56	7149.31	6220.53	7816.33
A	At3g61630	^ ^ ^ TF ^AP2/ERF^ERF-EREBP^AP2 domain-containing transcription factor, putative transcription factor Pti6 - Lycopersicon esculentum, PIR:T07728^	-1.50992	1	-1.05246	1	1.12207	1	-1.63178	1.05178e-12	1.15583	1	731.177	572.471	470.376	382.054	289.37	318.648
D	At3g61950	^ ^BHLH067^ TF ^bHLH^bHLH^basic helix-loop-helix (bHLH) family protein contains Pfam profile: PF00010 helix-loop-helix DNA-binding domain^	-1.25657	1	-1.09218	1	1.07854	1	1.2771	1	1.39089	0.0303428	171.6	138.411	772.725	955.823	1190.32	1548.3
D	At3g61970	^ ^ ^ TF ^ABI3/VP1^ ^DNA-binding protein, putative similar to DNA-binding proteins from [Arabidopsis thaliana] RAV1 GI:3868857 and RAV2 GI:3868859, AP2 domain containing protein RAP2.8 [Arabidopsis thaliana] GI:2281641; contains Pfam profile PF02362: B3 DNA binding domain^	1.36082	1	3.12371	2.3619e-08	2.21777	2.44746e-13	1.89701	6.8034e-11	-1.13025	1	162.449	232.45	579.301	1394.89	2429.01	2301.75
C	At3g62050	^ ^ ^ ^expressed protein contains Pfam profile PF04396: Protein of unknown function, DUF537^	1.16321	1	1.01119	1	-1.13849	1	1.30321	1	-1.53322	9.16837e-05	3136.28	3738.26	3391.28	3709.56	4068.57	3036.09
E	At3g62700	^ ^ABC(ATP-Binding Cassette);ABC Superfamily;ABC transporters;ATP-binding cassette (ABC) transporter activity^MRP subfamily;ABC transporter-like^glutathione-conjugate transporter, putative similar to glutathione-conjugate transporter AtMRP4 GI:2959767 from [Arabidopsis thaliana]^	-1.04859	1	-1.21787	1	-1.1015	1	1.42348	0.000273084	1.34255	0.00695924	5621.18	5426.88	5082.32	4869.71	7508	8506.4
A	At3g62740	^ ^glucosidase;Glycoside Hydrolase Family 1;Glycoside Hydrolase Gene Families;endomembrane system^Glycoside Hydrolase Family 1^glycosyl hydrolase family 1 protein contains Pfam PF00232 : Glycosyl hydrolase family 1 domain; similar to hydroxyisourate hydrolase (GI:19569603) [Glycine max]^	-1.42627	9.52965e-09	1.49136	1	-1.129	1	1.04416	1	1.28065	1	1194.48	921.463	924.615	909.067	869.479	1162.53
A	At3g62750	^ ^glucosidase;Glycoside Hydrolase Family 1;Glycoside Hydrolase Gene Families;endomembrane system^Glycoside Hydrolase Family 1^glycosyl hydrolase family 1 protein contains Pfam PF00232 : Glycosyl hydrolase family 1 domain; similar to hydroxyisourate hydrolase (GI:19569603) [Glycine max]^	-1.06787	1	-1.11991	1	1.09693	1	1.34639	0.00152197	1.06099	1	952.48	907.03	795.993	791.139	931.248	1096.45
E	At3g63140	^ ^mRNA binding activity^ ^mRNA-binding protein, putative similar to mRNA binding protein precursor (GI:26453355) [Lycopersicon esculentum]^	1.12438	1	1.11785	1	-1.08879	1	-1.3768	1	1.62744	0.00299348	2855.68	3446.38	3354.74	3279.27	3140.45	5073.16
C	At3g63450	^ ^nucleic acid binding activity^ ^RNA recognition motif (RRM)-containing protein contains InterPro entry IPR000504: RNA-binding region RNP-1 (RNA recognition motif) (RRM)^	1.28753	1	1.59332	0.0385557	1.29165	1	1.01837	1	-1.05223	1	2195.52	2375.4	3056.45	3300.32	2905.55	2929.28
B	At4g00040	^ ^acyltransferase activity;flavonoid biosynthesis^CHALCONE SYNTHASE^chalcone and stilbene synthase family protein similar to chalcone synthase homolog PrChS1, Pinus radiata, gb:U90341; similar to anther-specific protein [Nicotiana sylvestris][GI:2326774], YY2 protein [Oryza sativa][GI:2645170]^	-1.0075	1	-1.09728	1	1.13883	1	-1.1406	1	-1.5403	0.0435006	3564.66	3696.47	3190.28	3030.59	2729.54	2077.74
A	At4g00050	^ ^BHLH016^ TF ^bHLH^bHLH^basic helix-loop-helix (bHLH) family protein contains Pfam profile: PF00010 helix-loop-helix DNA-binding domain^	-2.08342	6.90768e-10	1.0539	1	-1.05713	1	1.13492	1	1.01347	1	2035.89	1007.09	765.399	809.383	658.824	674.63
C	At4g00150	^ ^SCL6^ TF ^GRAS^ ^scarecrow-like transcription factor 6 (SCL6) ^	-1.14719	1	1.18736	1	-1.02456	1	-1.39978	0.000789223	1.18066	1	1795.55	1774.44	2174.05	2584.43	1973.95	2282.63
D	At4g00180	^YABBY3^ ^ TF ^YABBY^ ^axial regulator YABBY3 (YABBY3) identical to YABBY3 [Arabidopsis thaliana] GI:4928753^	1.03169	1	1.70531	1	2.01891	3.87309e-11	1.12966	1	1.00713	1	1273.12	1234.73	2920.53	5250.85	5621.77	5401.75
B	At4g00340	^ ^S-Domain Kinase (Type 2) ;protein kinase activity^ ^S-locus glycoprotein family protein / curculin-like (mannose-binding) lectin family protein / PAN domain-containing protein contains Pfam profiles: PF01453 lectin (probable mannose binding), PF00954 S-locus glycoprotein family, PF00024 PAN domain^	-1.0522	1	-1.21211	1	-1.23322	0.00757444	1.01269	1	-1.08467	1	3511.62	3948.07	3222.94	2672.16	2440.03	2568.46
E	At4g00460	^ ^ ^ ^expressed protein contains Pfam profile PF03759: Domain of unknown function (DUF315)^	-1.13255	1	1.46666	0.0143408	1.09173	1	1.21016	1	1.17095	1	634.445	625.354	662.192	656.267	769.485	901.467
B	At4g00490	^ ^Glycoside Hydrolase Family 14;Glycoside Hydrolase Gene Families;chloroplast^Glycoside Hydrolase Family 14^beta-amylase, putative / 1,4-alpha-D-glucan maltohydrolase, putative similar to beta-amylase from SP:O64407 [Vigna unguiculata]; contains Pfam profile PF01373: Glycosyl hydrolase family 14^	1.08153	1	1.23721	1	1.23844	1	1.59362	0.0434808	-1.20597	1	9702.62	10126.4	9433.24	8901.76	11092	9874.3
C	At4g00500	^ ^Acyl Lipid Metabolism;Calmodulin-binding heat-shock - like family;CB-HSPs;calmodulin binding activity^Lipid Acylhydrolase-like^lipase class 3 family protein / calmodulin-binding heat-shock protein-related ^	1.32026	0.0308712	1.16432	1	1.18175	1	-1.05123	1	-1.32113	1	1132.21	1760.45	2242.33	2445.21	2467.47	2056.44
D	At4g00810	^ ^structural constituent of ribosome^ ^60S acidic ribosomal protein P1 (RPP1B) similar to acidic ribosomal protein p1^	-1.75682	1	-2.20855	0.005298	-1.13633	1	1.0992	1	-1.13395	1	21488.8	22662.2	22466.6	22773.2	22415.3	21783.2
A	At4g00970	^ ^DUF26 Kinase ;receptor activity^ ^protein kinase family protein contains Pfam domain PF00069: Protein kinase domain^	-1.17804	1	1.44134	1	-1.28883	1	-1.06514	1	1.96818	9.54007e-05	2052.31	1827.2	1752.82	1342.29	1343.23	1851.71
D	At4g01060	^ ^ ^ TF ^MYB-related^ ^myb family transcription factor contains PFAM profile: PF00249 myb-like DNA binding domain^	2.27174	5.56026e-37	1.78402	0.0241361	1.93159	4.51872e-25	1.77724	3.73548e-11	-1.18523	1	145.711	338.194	568.947	1063.51	1508.36	1346.79
C	At4g01170	^ ^ ^ ^hypothetical protein ^	1.73258	1	4.22957	2.82161e-06	1.44194	1	-1.23959	1	-1.89952	1	33.3657	47.8334	171.284	213.228	163.199	75.2074
E	At4g01330	^ ^RLCK V ;protein kinase activity^ ^protein kinase family protein contains protein kinase domain, Pfam:PF00069; contains serine/threonine protein kinase domain, INTERPRO:IPR002290^	-1.05875	1	1.11188	1	-1.15249	1	-1.17966	1	1.6732	0.0091785	1889.47	2256.38	2069.91	1998.05	2130.13	2717.85
A	At4g01360	^ ^chloroplast^ ^expressed protein ^	-1.99347	0.000143722	-1.45874	1	-1.02137	1	-1.0195	1	1.04279	1	302.231	134.843	82.9835	83.9864	77.5624	77.5847
E	At4g01410	^ ^ ^ ^harpin-induced family protein / HIN1 family protein / harpin-responsive family protein similar to harpin-induced protein hin1 ( GI:1619321) [Nicotiana tabacum]^	-1.07147	1	-1.00225	1	1.36959	1	1.46197	1	1.55784	0.0266569	5005.6	5035.6	4178.85	4883.89	7012.72	8410.33
C	At4g01480	^ ^phosphatase^ ^inorganic pyrophosphatase, putative [soluble] / pyrophosphate phospho-hydrolase, putative / PPase, putative strong similarity to SP|Q43187 Soluble inorganic pyrophosphatase (EC 3.6.1.1) (Pyrophosphate phospho- hydrolase) (PPase) {Solanum tuberosum}; contains Pfam profile PF00719: inorganic pyrophosphatase^	2.08627	0.000139777	-1.29348	1	-1.21486	1	1.02554	1	-1.51802	1	830.326	1631.95	1589.68	1513.54	1264.45	943.133
E	At4g01500	^ ^ ^ TF ^ABI3/VP1^ ^DNA-binding protein, putative similar to DNA-binding proteins from [Arabidopsis thaliana] RAV1 GI:3868857, RAV2 GI:3868859; contains Pfam profile PF02362: B3 DNA binding domain^	-1.11608	1	1.02534	1	1.2266	1	1.4606	1	1.74878	0.000136299	185.305	147.191	154.181	186.99	278.572	412.256
A	At4g01600	^ ^ ^ ^GRAM domain-containing protein / ABA-responsive protein-related similar to ABA-responsive protein [Hordeum vulgare] GI:4103635; contains Pfam profile PF02893: GRAM domain^	-2.26005	0.00341549	-1.51327	1	-1.05813	1	-1.22182	1	-1.08493	1	277.262	137.335	103.774	96.7195	75.7481	72.1271
E	At4g01700	^ ^Glycoside Hydrolase Family 19;Glycoside Hydrolase Gene Families;endomembrane system^Glycoside Hydrolase Family 19^chitinase, putative similar to peanut type II chitinase GI:1237025 from [Arachis hypogaea]^	-1.35504	1	1.00164	1	1.15754	1	1.36744	1	1.90013	3.22513e-07	85.0177	60.3719	66.345	116.931	274.087	467.658
A	At4g01970	^ ^Glycoside Hydrolase Family 36;Glycoside Hydrolase Gene Families^Glycoside Hydrolase Family 36^galactinol-raffinose galactosyltransferase, putative similar to galactinol-raffinose galactosyltransferase GI:6634701 from [Vigna angularis]^	-5.47101	3.14954e-22	-1.19896	1	1.48381	1	-1.21602	1	1.02063	1	3661.53	1141.56	715.078	833.606	602.867	587.329
A	At4g02130	^ ^Glycosyltransferase Family 8;Glycosyltransferase Gene Families;glycosyltransferase^Glycosyltransferase- Family 8^glycosyl transferase family 8 protein low similarity to lgtC of Neisseria sp., GenBank accession number U14554, U65788; contains Pfam glycosyl transferase family 8 domain PF01501^	-1.87417	2.27439e-07	1.13749	1	1.26428	1	-1.09055	1	-1.11024	1	882.58	485.245	477.26	689.861	598.856	592.245
A	At4g02280	^ ^Glycosyltransferase Family 4;Glycosyltransferase Gene Families;glycosyltransferase;sucrose biosynthesis^Glycosyltransferase- Family 4;SUCROSE SYNTHETASE^sucrose synthase, putative / sucrose-UDP glucosyltransferase, putative strong similarity to sucrose synthase GI:6682841 from [Citrus unshiu]^	-1.71816	6.57385e-05	-2.0183	5.15807e-05	-1.49793	1	-2.45803	4.33319e-06	1.31564	1	1197.35	912.444	506.791	272.686	121.954	183.942
A	At4g02360	^ ^endomembrane system^ ^expressed protein contains Pfam profile PF04398: Protein of unknown function, DUF538^	-1.18642	1	1.13111	1	1.48995	0.0283978	-1.08075	1	-1.20109	1	1694.15	1283.26	1354.36	1868.43	1790.59	1565.72
A	At4g02380	^SENESCENCE-ASSOCIATED GENE 21^Nitrate Metabolism;chloroplast^NO3resp-SAG21^late embryogenesis abundant 3 family protein / LEA3 family protein similar to several small proteins (~100 aa) that are induced by heat, auxin, ethylene and wounding such as Phaseolus aureus indole-3-acetic acid induced protein ARG (SW:32292); contains Pfam profile PF03242: Late embryogenesis abundant protein^	-1.4476	1	-2.17184	0.0417136	1.17289	1	-1.87084	0.52438	1.12154	1	667.271	448.3	233.339	258.722	186.026	360.83
E	At4g02410	^ ^Legume Lectin Domain Kinase ;Receptor kinase-like protein family;kinase activity^ ^lectin protein kinase family protein contains Pfam domains, PF00069: Protein kinase domain, PF00139: Legume lectins beta domain and PF00138: Legume lectins alpha domain^	-1.15312	1	-1.3077	1	1.27974	1	1.51822	1	2.05342	1.56074e-14	155.698	126.107	92.5415	84.3984	134.843	364.981
E	At4g02420	^ ^Legume Lectin Domain Kinase ;Receptor kinase-like protein family;kinase activity^ ^lectin protein kinase, putative similar to receptor lectin kinase 3 [Arabidopsis thaliana] gi|4100060|gb|AAD00733; contains protein kinase domain, Pfam:PF00069; contains legume lectins alpha and beta domains, Pfam:PF00138 and Pfam:PF00139^	-1.03481	1	-1.08147	1	1.07079	1	1.6544	4.156e-08	2.33225	5.05537e-36	237.138	218.032	203.493	239.918	539.897	1125.89
A	At4g02520	^ATPM24^ ^ ^glutathione S-transferase, putative ^	-1.66206	1	-1.8541	7.12783e-12	1.23545	1	-1.55354	0.110765	-1.27475	1	1741.72	1379.49	557.913	604.292	454.579	466.152
A	At4g02530	^ ^ ^ ^chloroplast thylakoid lumen protein SP:022773 ;TL16_ARATH^	-1.31889	0.0282614	1.02378	1	1.02571	1	-1.05681	1	1.32297	1	13041.4	10739.4	11188.1	10193.7	9493.27	10009.9
B	At4g02580	^ ^NADH dehydrogenase (ubiquinone) activity^ ^NADH-ubiquinone oxidoreductase 24 kDa subunit, putative similar to NADH-ubiquinone oxidoreductase 24 kDa subunit, mitochondrial precursor (EC 1.6.5.3) (EC 1.6.99.3) (Polypeptide II) (Swiss-Prot:P04394) [Bos taurus]^	-1.14152	1	1.04344	1	1.10159	1	-1.44161	0.0266317	1.04298	1	14992.9	13162.5	14923.9	14962.5	12899.9	14641.1
C	At4g02630	^ ^RLCK V ;protein serine/threonine kinase activity^ ^protein kinase family protein contains protein kinase domain, Pfam:PF00069; contains serine/threonine protein kinase domain, INTERPRO:IPR002290^	1.60223	1.84796e-07	-1.44651	0.00450466	-1.27873	1	1.06995	1	-1.15843	1	2921.36	4539.91	4074.17	4108.18	4356.98	3606.17
D	At4g02670	^ ^ ^ TF ^C2H2 (Zn)^ ^zinc finger (C2H2 type) family protein similar to potato PCP1 zinc finger protein, GenBank accession number X82328 contains Pfam domain, PF00096: Zinc finger, C2H2 type^	2.63871	2.33785e-12	1.63035	1	1.3373	1	1.46377	1	-1.28105	1	643.838	1345.36	1786.54	2080.27	2729.2	2624.77
B	At4g02990	^ ^mitochondrion^ ^mitochondrial transcription termination factor family protein / mTERF family protein weak similarity to mtDBP protein [Paracentrotus lividus] GI:4584695; contains Pfam profile PF02536: mTERF^	-1.00195	1	-1.02107	1	-1.04745	1	-1.01669	1	1.33602	0.00299348	2794.76	2718.39	2685.98	2718.59	2618.27	3343.89
E	At4g03050	^ ^ ^ ^2-oxoglutarate-dependent dioxygenase, putative (AOP3) strong similarity to AOP3 [Arabidopsis thaliana] GI:16118893; contains Pfam profile PF03171: 2OG-Fe(II) oxygenase superfamily domain; identical to cDNA AOP3 GI:16118892^	-1.52136	1	1.52537	1	1.24122	1	2.31482	0.0243978	1.55569	0.000203981	410.152	292.745	330.083	315.475	722.627	1159.58
B	At4g03175	^ ^protein kinase activity^ ^protein kinase family protein contains similarity to Swiss-Prot:P51566 protein kinase AFC1 [Arabidopsis thaliana]^	1.05528	1	-1.37633	1	1.23998	1	1.12732	1	-1.49301	0.0248132	1374.43	1470.76	1149.32	1175.16	1068.45	938.338
B	At4g03320	^ ^Chloroplast and Mitochondria gene families;chloroplast^Putative chloroplast protein import component^chloroplast protein import component-related similar to P. sativum Tic20 chloroplast protein import component (GI:3769673)^	-1.00145	1	-1.06623	1	1.06861	1	1.03888	1	-1.59848	0.0411325	2039.21	1958.26	1631.97	1727.4	1389.78	986.026
A	At4g03330	^ATSYP123^Syntaxin;membrane^SYP12 Gene Family^syntaxin, putative (SYP123) similar to SP|Q9ZSD4 Syntaxin 121 (AtSYP121) (Syntaxin-related protein At-Syr1) {Arabidopsis thaliana}^	-1.10633	1	-1.49927	0.000881261	1.42063	1	1.32351	1	1.23671	1	701.488	590.811	415.312	589.994	595.401	625.317
D	At4g03400	^DWARF IN LIGHT 2^Acyl-activating enzymes (AAE);electron transporter activity^Clade III^auxin-responsive GH3 family protein similar to auxin-responsive GH3 product [Glycine max] GI:18591; contains Pfam profile PF03321: GH3 auxin-responsive promoter^	1.07895	1	1.32249	1	1.41381	1	1.47964	0.000387002	1.17365	1	1673.51	2004.22	1939.76	2675.87	3365.97	2922.37
D	At4g04130	^ ^mitochondrion^ ^Ulp1 protease family protein contains Pfam profile PF02902: Ulp1 protease family, C-terminal catalytic domain; similar to At2g11345, At3g42690^	1.17576	1	-1.35567	1	1.06424	1	2.05332	2.74155e-07	1.26078	1	40.2243	62.8379	75.3302	112.355	208.329	183.755
B	At4g04690	^ ^F-box (FBX)^A1^F-box family protein (FBX15) contains F-box domain PF:00646^	-1.47163	1	-1.12482	1	1.05633	1	-1.40207	0.000252991	-1.37241	1	7168.13	5148.09	5318.49	5683.07	4108.34	3221.21
E	At4g05050	^UBIQUITIN 11^ubiquitin-dependent protein catabolism^ ^polyubiquitin (UBQ11) identical to GI:304117^	-2.3673	1.54122e-05	1.26729	1	-1.04772	1	-1.17185	1	1.32402	1	27856.3	18904.2	23601.4	24957	17586.9	25648.3
B	At4g05120	^ ^ENT(Equilibrative Nucleoside Transporter);Organic Solute Cotransporters;EF-hand containing proteins:Group II;nucleoside transporter activity^Putative nucleoside transporter family^equilibrative nucleoside transporter, putative (ENT3) identical to putative equilibrative nucleoside transporter ENT3 [Arabidopsis thaliana] GI:16518993; contains similarity to SWISS-PROT:O54699 equilibrative nucleos…	1.37744	1	-1.01433	1	-1.13028	1	-1.46238	0.000439966	1.03859	1	579.343	861.605	872.083	760.428	579.658	554.544
B	At4g05136	^ ^mitochondrion^ ^hypothetical protein contains Pfam profile PF03778: Protein of unknown function (DUF321)^	1.22888	1	1.02918	1	-1.36179	1	-2.11689	6.2861e-08	1.40274	1	1230.38	1988.99	1706.98	1236.03	849.599	866.618
E	At4g05240	^ ^ ^ ^ubiquitin family protein contains INTERPRO:IPR000626 ubiquitin domain^	1.86443	1	1.18099	1	1.40095	1	5.45718	0	1.83602	0.020387	104.862	182.867	207.514	271.123	1028	1560.82
B	At4g05380	^ ^nucleotide binding activity^ ^AAA-type ATPase family protein contains similarity to mitochondrial ATPase (AAA family) Bcs1p, Saccharomyces cerevisiae, Swiss Prot:P32839^	1.79334	1	-1.13391	1	-1.2986	1	-1.27253	1	-1.68646	2.77711e-10	805.498	1236.07	986.254	934.095	711.587	482.52
B	At4g07650	AT4G07650_1 hypothetical protein	1.13999	1	-1.1378	1	-1.48023	9.67504e-06	-1.61119	0.000418779	1.10222	1	182.159	272.456	267.686	166.341	130.905	154.658
A	At4g08770	^ ^Class III peroxidase;endomembrane system^ ^peroxidase, putative identical to class III peroxidase ATP38 [Arabidopsis thaliana] gi|17530568|gb|AAL40851; similar to peroxidase C2 precursor [Armoracia rusticana] SWISS-PROT: P17179; identical to cDNA class III peroxidase ATP38 GI:17530567^	-2.70543	4.29162e-15	-1.01352	1	1.06873	1	-1.13486	1	1.1507	1	695.806	273.132	172.649	178.678	140.159	119.235
A	At4g08780	^ ^Class III peroxidase;endomembrane system^ ^peroxidase, putative similar to peroxidase isozyme [Armoracia rusticana] gi|217932|dbj|BAA14143^	-3.11335	9.87493e-22	-1.22869	1	1.19134	1	-1.37727	1	-1.26295	1	901.812	342.994	382.573	349.072	238.957	158.541
B	At4g08850	^ ^LRR XI & LRR XII ;Receptor kinase-like protein family;kinase activity^ ^leucine-rich repeat family protein / protein kinase family protein contains Pfam domains PF00560: Leucine Rich Repeat and PF00069: Protein kinase domain^	1.56555	1.91225e-09	-1.37239	1	-1.28062	1	1.16133	1	1.2	1	487.737	724.464	571.3	479.519	501.573	505.479
E	At4g08950	^ ^endomembrane system^ ^phosphate-responsive protein, putative (EXO) similar to phi-1 (phosphate-induced gene) [Nicotiana tabacum] GI:3759184; contains Pfam profile PF04674: Phosphate-induced protein 1 conserved region^	1.95	1	-1.32704	1	1.21737	1	1.03159	1	1.91259	0.0237327	9786.2	18351.1	11697.3	14488.7	15358.5	17994.4
D	At4g09030	^ ^GPI-anchored protein;Structural proteins;chloroplast^Classical AGPs;Arabinogalactan-proteins (AGPs)^arabinogalactan-protein (AGP10) identical to gi|10880497|gb|AAG24278; supported by Ceres cDNA 265772^	1.47162	1	1.31826	1	1.53531	2.07565e-05	1.01174	1	-1.20161	1	1910.82	2607.45	2813.47	4787.34	5188.75	4747.8
B	At4g09140	^MLH1^mismatch repair^ ^DNA mismatch repair protein MLH1 (MLH1) identical to MLH1 protein [Arabidopsis thaliana] GI:3893081^	-1.01717	1	1.08948	1	-1.25119	1	1.34996	1	-1.52347	0.0227057	3751.79	3845.01	3736.15	3290.05	4059.96	3056.28
A	At4g09350	^ ^ ^ ^DNAJ heat shock N-terminal domain-containing protein similar to SP|Q45552 Chaperone protein dnaJ {Bacillus stearothermophilus}; contains Pfam profile PF00226: DnaJ domain^	-1.12088	1	1.21103	1	1.20445	1	1.22738	1	1.44725	3.69657e-05	342.425	306.455	357.722	366.711	329.966	408.564
B	At4g09550	^ ^subtilase activity^ ^expressed protein ^	1.20803	1	-1.06417	1	-1.06114	1	1.15272	1	-1.67112	0.00304624	6245.04	6875.78	5884.37	6146.44	6706.91	4585.56
A	At4g10060	^ ^ ^ ^expressed protein contains Pfam domain PF04685: Protein of unknown function, DUF608^	-1.91754	6.23087e-05	-1.55049	1	1.30663	1	-1.18114	1	1.02082	1	5700.53	3666.41	2580.63	2574.9	2403.58	2820.93
A	At4g10260	^ ^fructokinase activity;sucrose degradation 1;sucrose biosynthesis^FRUCTOKINASE^pfkB-type carbohydrate kinase family protein contains Pfam profile: PF00294 pfkB family carbohydrate kinase^	1.03565	1	-1.72553	0.00281006	-1.2234	1	1.29781	1	-1.3049	1	2976.51	2397.2	1571.64	1345.55	1598.07	1551.86
A	At4g10265	^ ^ ^ ^wound-responsive protein, putative similar to wound induced protein [Lycopersicon esculentum] GI:19320^	-1.31437	1	1.16113	1	1.12808	1	1.03061	1	-1.99356	0.000562648	12458	6896.9	7101.83	7855.6	11328.9	7435.24
B	At4g10340	^LIGHT HARVESTING COMPLEX OF PHOTOSYSTEM II 5^Chloroplast and Mitochondria gene families;chlorophyll binding activity^Chlorophyll a/b-binding protein family^chlorophyll A-B binding protein CP26, chloroplast / light-harvesting complex II protein 5 / LHCIIc (LHCB5) identical to SP|Q9XF89 Chlorophyll A/B-binding protein CP26, chloroplast precursor (Light-harvesting complex II protein 5) (LHCB5) (LHC…	-3.16582	3.93584e-05	-1.11629	1	1.54278	1	-1.44281	1	-1.30002	1	20360.2	15651.2	17990.1	16522.3	12159.5	14426.8
A	At4g10910	^ ^chloroplast^ ^expressed protein ^	-1.42678	1	-1.46267	1	-1.01925	1	1.03789	1	1.64679	4.88427e-09	293.625	240.897	205.084	213.066	222.92	360.945
A	At4g11190	^ ^endomembrane system^ ^disease resistance-responsive family protein / dirigent family protein similar to dirigent protein [Forsythia x intermedia] gi|6694693|gb|AAF25357; similar to disease resistance response protein 206-d [Pisum sativum] gi|508844|gb|AAB18669^	-4.73326	0.000574081	1.18277	1	1.26716	1	-1.5054	1	1.06912	1	757.732	171.937	181.356	191.655	148.57	255.671
A	At4g11910	^ ^chloroplast^ ^expressed protein hypothetical protein F7H19.100 -Arabidopsis thaliana,PID:e1310060^	-1.85309	0.0205783	-1.08907	1	1.09569	1	1.06603	1	-1.00092	1	245.878	131.032	115.118	156.932	188.065	220.381
A	At4g12330	^ ^Cytochrome P450;cytochrome P450 activity^CYP706A^cytochrome P450 family protein contains Pfam profile:PF00067 cytochrome p450^	-1.26379	0.0473062	1.11931	1	-1.00068	1	-1.08933	1	1.0204	1	985.241	734.137	879.921	874.376	593.685	563.086
A	At4g12440	^ ^adenine phosphoribosyltransferase activity;nucleotide metabolism^ADENINE PHOSPHORIBOSYLTRANSFERASE^adenine phosphoribosyltransferase, putative strong similarity to SP|P31166 Adenine phosphoribosyltransferase 1 (EC 2.4.2.7) (APRT) {Arabidopsis thaliana}; contains Pfam profile PF00156: Phosphoribosyl transferase domain^	-2.66547	7.33809e-05	1.29659	1	1.0334	1	-1.91448	0.26246	-1.33701	1	230.453	122.085	174.222	154.498	84.7613	56.4141
C	At4g12850	^ ^ ^ ^far-red impaired responsive family protein / FAR1 family protein weak similarity to far-red impaired response protein [Arabidopsis thaliana] GI:5764395; contains Pfam profile PF03101: FAR1 family^	1.37495	5.09674e-05	1.01137	1	-1.11182	1	1.10806	1	-1.12906	1	1864.28	2526.73	2080.04	2320.98	2831.83	2418.71
A	At4g12890	^ ^endomembrane system^ ^gamma interferon responsive lysosomal thiol reductase family protein / GILT family protein similar to SP|P13284 Gamma-interferon inducible lysosomal thiol reductase precursor {Homo sapiens}; contains Pfam profile PF03227: Gamma interferon inducible lysosomal thiol reductase (GILT)^	-1.32908	1	-2.29855	6.6894e-08	1.51684	1	-1.12672	1	-1.75791	0.00383989	565.286	423.828	272.2	240.431	166.48	99.923
E	At4g12910	^ ^serine carboxypeptidase activity^ ^serine carboxypeptidase S10 family protein SERINE CARBOXYPEPTIDASE I PRECURSOR - Hordeum vulgare, SWall:CBP1_HORVU^	-1.11834	1	1.19323	1	1.88318	5.41178e-06	1.23974	1	1.17015	1	178.913	164.157	167.447	267.327	310.129	374.531
E	At4g12980	^ ^ ^ ^auxin-responsive protein, putative similar to auxin-induced protein AIR12 GI:11357190 [Arabidopsis thaliana]^	1.00589	1	1.14911	1	1.33325	1	2.24535	6.54508e-07	1.62965	1	1318.11	1448.57	1534.11	2071.47	4590.27	6838.13
E	At4g13510	^AMMONIUM TRANSPORT 1^Nitrate Metabolism;Amt(Ammonium Transporter);Inorganic Solute Cotransporters;ammonium transporter activity^NO3resp-AMT1;Ammonium transporter family^ammonium transporter 1, member 1 (AMT1.1) identical to SP|P54144 High affinity ammonium transporter (AtAMT1;1) {Arabidopsis thaliana}^	-1.48509	0.0298292	1.34835	1	1.29273	1	1.02993	1	1.66703	1	5235.3	3159.42	4282.64	5372.93	5532.93	7046.26
E	At4g13540	^ ^ ^ ^expressed protein ^	-2.5142	1.66441e-10	-1.36969	1	1.5566	1	1.45808	1	1.46671	1	7073.38	3822.71	3264.45	4347.94	5639.62	8644.75
A	At4g13950	^RALF-LIKE 31^ ^ ^rapid alkalinization factor (RALF) family protein similar to RALF precursor [Nicotiana tabacum] GI:16566316^	-1.18412	1	1.50602	0.0298546	-1.27103	1	-1.15394	1	1.43657	1	6872.87	5064.9	5763.51	5785.14	5063.02	6681.97
A	At4g14040	^ ^selenium binding activity^ ^selenium-binding protein, putative contains Pfam profile PF05694: 56kDa selenium binding protein (SBP56); similar to Putative selenium-binding protein (Swiss-Prot:O23264) [Arabidopsis thaliana]; similar to selenium binding protein (GI:15485232) [Arabidopsis thaliana]^	-2.74156	0	1.14456	1	1.65707	1	1.48102	1	-1.07533	1	4678.58	2065.66	1460	2241.31	3360.38	3992
E	At4g14090	^ ^Glycosyltransferase Family 1;mitochondrion^ ^UDP-glucoronosyl/UDP-glucosyl transferase family protein contains Pfam profile: PF00201 UDP-glucoronosyl and UDP-glucosyl transferase ;similar to UDP-glucose:anthocyanin 5-O-glucosyltransferase GI:4115563 from [Verbena x hybrida]^	-1.89329	0.0179126	-1.24918	1	1.41739	1	4.37875	3.39598e-34	1.73136	1	708.103	577.464	363.836	558.84	2515.83	3896.59
C	At4g14120	^ ^ ^ ^expressed protein ^	-1.01701	1	1.53586	0.0214965	1.00444	1	1.05326	1	-1.0012	1	2091.17	2347.47	2734.2	2500.43	2709.86	2986.38
A	At4g14130	^XYLOGLUCAN ENDOTRANSGLYCOSYLASE 7^ Assembly, Architecture, and Growth;Glycoside Hydrolase Family 16;Glycoside Hydrolase Gene Families;endomembrane system ^Growth modifying proteins;Glycoside Hydrolase Family 16^xyloglucan:xyloglucosyl transferase, putative / xyloglucan endotransglycosylase, putative / endo-xyloglucan transferase, putative (XTR7) almost identical to xyloglucan endotransglycosylas…	-1.1874	1	-1.31304	1	-1.20743	1	-2.80494	0.0028566	1.35056	1	626.737	441.451	417.029	285.775	136.079	190.357
A	At4g14365	^ ^ ^ ^zinc finger (C3HC4-type RING finger) family protein / ankyrin repeat family protein contains Pfam profile: PF00097 zinc finger, C3HC4 type (RING finger) and Pfam profile: PF00023 ankyrin repeat^	-1.26565	1	-2.90134	3.21775e-05	-1.15999	1	-1.41358	1	1.29801	1	585.914	477.348	173.765	180.504	181.112	242.825
E	At4g14440	^ ^ Carnitine racemase like family;carnitine racemase activity;carnitine metabolism;carnitine metabolism, CoA-linked ^CARNITINE RACEMASE^enoyl-CoA hydratase/isomerase family protein low similarity to PhaB [Pseudomonas putida] GI:3253198, SP|P31551 Carnitine racemase {Escherichia coli}; contains Pfam profile PF00378 enoyl-CoA hydratase/isomerase family protein^	-1.9999	9.31765e-09	1.0494	1	1.32107	1	1.23794	1	1.50339	1	3063.18	1866.26	1810.56	2070.23	2067.89	3392.09
E	At4g14620	^ ^chloroplast^ ^expressed protein contains Pfam profile PF04720: Protein of unknown function (DUF506)^	-1.2722	0.0109837	1.00667	1	1.06904	1	1.06119	1	1.33458	1	2877.7	2576.08	2587.87	2736.19	2611.8	3562.67
E	At4g14650	^ ^endomembrane system^ ^expressed protein ^	1.03715	1	-1.07451	1	-1.99234	1	1.66656	1	2.41466	2.38003e-08	45.2914	53.7415	57.0686	29.5124	55.7795	139.145
B	At4g15093	^ ^ ^ ^catalytic LigB subunit of aromatic ring-opening dioxygenase family contains Pfam PF02900: Catalytic LigB subunit of aromatic ring-opening dioxygenase^	1.06804	1	-1.15178	1	-1.10928	1	-1.18233	1	-1.28411	0.000549419	1469.67	1549.51	1350.76	1212	1130.01	898.948
D	At4g15160	^ ^endomembrane system^ ^protease inhibitor/seed storage/lipid transfer protein (LTP) family protein similar to SP|Q00451|PRF1_LYCES 36.4 kDa proline-rich protein Lycopersicon esculentum, proline-rich cell wall protein [Medicago sativa] GI:3818416; contains Pfam profile PF00234 Protease inhibitor/seed storage/LTP family^	1.06863	1	2.19022	0.0158694	2.34292	9.85267e-10	1.15099	1	-1.36964	1	541.588	601.208	1144.36	2552.29	2538.14	2130.32
C	At4g15210	^BETA-AMYLASE^Glycoside Hydrolase Family 14;Glycoside Hydrolase Gene Families;beta-amylase activity;starch and cellulose biosynthesis^Glycoside Hydrolase Family 14;BETA-AMYLASE^beta-amylase (BMY1) / 1,4-alpha-D-glucan maltohydrolase identical to Beta-amylase (EC 3.2.1.2) (1,4-alpha-D-glucan maltohydrolase) SP:P25853 [Arabidopsis thaliana]^	-1.21855	1	1.15334	1	1.20833	1	-1.77204	0.0126475	-1.11174	1	10695.5	11583.5	12459.2	12207.6	10742.4	12442.9
B	At4g15250	^ ^COL11^ TF ^CO-like (Zn)^ ^zinc finger (B-box type) family protein ^	1.86259	1	2.8532	2.19965e-05	-1.20185	1	-1.66946	1	-1.00329	1	162.039	161.455	243.53	198.116	176.568	211.822
E	At4g15440	^ ^Acyl Lipid Metabolism;JA;Cytochrome P450;cytochrome P450 activity;lipoxygenase pathway^Hydroperoxide Lyase;CYP74B^hydroperoxide lyase (HPL1) identical to hydroperoxide lyase GI:3822403 from [Arabidopsis thaliana]^	1.25387	1	-1.08748	1	1.33823	1	2.3296	5.41457e-05	1.24894	1	953.193	1356.21	1309.62	1654.15	3062.47	4161.6
D	At4g15620	^ ^ ^ ^integral membrane family protein contains TIGRFAM TIGR01569 : plant integral membrane protein TIGR01569; contains Pfam PF04535 : Domain of unknown function (DUF588)^	-1.92889	0.00559061	1.9624	0.00135869	1.93224	1.82662e-10	1.22264	1	-1.05076	1	3598.18	2240.28	3023.01	5160.02	8072.9	7347.8
C	At4g15630	^ ^ ^ ^integral membrane family protein contains TIGRFAM TIGR01569 : plant integral membrane protein TIGR01569; contains Pfam PF04535 : Domain of unknown function (DUF588)^	-1.05052	1	1.34379	0.0239784	1.18453	1	-1.03342	1	-1.31756	1	7843.96	7991.57	9738.16	9441.43	10661.8	8901.88
B	At4g15765	^ ^ ^ ^monooxygenase family protein similar to monooxygenase 1 (MO1) [gi:3426062], MO2 [gi:3426064]^	1.54053	0.0300897	-1.1081	1	-1.60607	0.0464082	-1.69192	1	-1.35716	1	348.093	574.629	474.562	306.321	201.379	138.924
A	At4g15920	^ ^MTN3-like protein family;cytochrome^ ^nodulin MtN3 family protein similar to MtN3 GI:1619602 (root nodule development) from [Medicago truncatula]^	-2.19137	3.36811e-36	-1.20997	1	1.26134	1	1.29198	1	1.05613	1	5591.47	3052.45	2979.24	3371.66	3367.02	3591.77
E	At4g16050	^ ^ ^ ^expressed protein ^	-1.01363	1	1.17573	1	1.15843	1	1.9696	4.2137e-10	1.83305	8.54374e-06	110.011	121.853	147.331	142.616	263.061	474.906
E	At4g16160	^ ^ ^ ^mitochondrial import inner membrane translocase subunit Tim17/Tim22/Tim23 family protein contains Pfam PF02466: Mitochondrial import inner membrane translocase subunit Tim17^	1.5595	1	1.01656	1	1.0903	1	1.56998	0.000413494	1.0004	1	175.532	288.376	288.968	435.872	480.063	746.088
D	At4g16265	^ ^putative DNA-binding protein;DNA binding activity^ ^DNA-directed RNA polymerase II, putative similar to SP|P36958 DNA-directed RNA polymerase II 15.1 kDa polypeptide (EC 2.7.7.6) {Drosophila melanogaster}; contains Pfam profile PF02150: RNA polymerases M/15 Kd subunit^	1.30885	0.00716297	1.03595	1	1.07846	1	1.273	1	-1.25674	1	7551.38	8671.46	6278.95	7304.79	12052.9	8572.42
E	At4g16270	^ ^Class III peroxidase;endomembrane system^ ^peroxidase 40 (PER40) (P40) identical to SP|O23474 Peroxidase 40 precursor (EC 1.11.1.7) (Atperox P40) {Arabidopsis thaliana}^	2.7214	0.51916	2.16958	1	2.42367	1.8953e-19	4.15755	1.24493e-06	1.40983	1	60.3716	144.779	271.832	874.096	3492.28	4420.64
D	At4g16370	^OLIGOPEPTIDE TRANSPORTER^EMB;OPT(Oligopeptide Transporter);Organic Solute Cotransporters;oligopeptide transporter activity^Embryo Defective;Putative oligopeptide transporter ISP4-like family^oligopeptide transporter OPT family protein similar to oligopeptide transporter Opt1p [Candida albicans] GI:2367386; contains Pfam profile PF03169: OPT oligopeptide transporter protein^	-1.11955	1	1.8594	5.99265e-07	1.04735	1	1.09278	1	1.1259	1	1745.2	2109.15	3090.95	4189.98	4099.73	3975.73
A	At4g16447	^ ^mitochondrion^ ^expressed protein ^	-1.66243	0.010225	-1.59409	1	1.25671	1	1.01694	1	-1.26357	1	10514.8	6882.14	3686.7	4305.73	5185.1	5310.16
D	At4g16550	^ ^ ^ ^heat shock protein-related contains similarity to Swiss-Prot:P31170 small heat shock protein, chloroplast precursor [Arabidopsis thaliana]^	1.47093	1	5.62252	1.06162e-23	1.69676	1	1.24398	1	1.03517	1	269.157	511.609	2030.79	4425.45	6027.04	6240.24
E	At4g16560	^ ^ ^ ^heat shock protein-related contains similarity to SWISS-PROT:P31170 small heat shock protein, chloroplast precursor [Arabidopsis thaliana]^	-1.5435	0.00422786	-1.07676	1	2.43147	3.0479e-21	2.39557	1.48052e-10	1.73982	1	556.095	415.61	420.338	1154.81	2576.04	4922.51
E	At4g16590	^ATCSLA1^Cellulose-synthase-like genes ;Glycosyltransferase Family 2;Glycosyltransferase Gene Families;Putative glucosyltransferase family;cellulose synthase activity^CSLA;Glycosyltransferase- Family 2^glucosyltransferase-related low similarity to beta-(1-3)-glucosyl transferase [Bradyrhizobium japonicum] GI:3687658^	-2.47712	1.90885e-06	-1.02007	1	3.3498	1	1.44275	1	1.11151	1	478.699	250.793	231.928	612.146	783.012	1087.95
C	At4g16780	^ ^ATHB-2/HAT4^ TF ^HB^HD-Zip II^homeobox-leucine zipper protein 4 (HAT4) / HD-ZIP protein 4 SP|Q05466|HAT4_ARATH Homeobox-leucine zipper protein HAT4 (HD-ZIP protein 4) (SP:Q05466) [Arabidopsis thaliana] (HD-ZIP homeotic protein Athb-2^	1.39126	0.00357245	-1.09655	1	-1.10166	1	1.05434	1	1.00433	1	754.615	983.584	916.612	968.462	905.498	937.377
B	At4g16860	^RECOGNITION OF PERONOSPORA PARASITICA 4^Pathogen Defense;Disease Resistance;chloroplast^TNL(TIR-NBS-LRR);NB-LRR^disease resistance protein (TIR-NBS-LRR class), putative domain signature TIR-NBS-LRR exists, suggestive of a disease resistance protein.^	-1.10018	1	1.42399	1	-2.44343	1.04366e-08	-1.48354	1	1.76734	1	288.477	299.385	454.849	226.328	353.304	221.351
B	At4g17460	^ ^HAT1^ TF ^HB^HD-Zip II^homeobox-leucine zipper protein 1 (HAT1) / HD-ZIP protein 1 identical to Homeobox-leucine zipper protein HAT1 (SP:P46600) [Arabidopsis thaliana]^	-1.09469	1	-1.21546	1	1.31935	0.0120069	1.13233	1	-1.23313	1	6634.75	7364.78	5048.58	6529.08	8490.49	6073.87
C	At4g17770	^TPS5^Glycosyltransferase Family 20;Glycosyltransferase Gene Families;Trehalose Biosynthesis Gene Families;glycosyltransferase;trehalose biosynthesis;trehalose anabolism^Glycosyltransferase- Family 20;Class II AtTPS;TREHALOSE-6-PHOSPHATE SYNTHASE^glycosyl transferase family 20 protein / trehalose-phosphatase family protein contains Pfam profile: PF02358 trehalose-phosphatase^	1.19325	1	1.22516	1	1.05871	1	1.24925	0.00386068	-1.03822	1	2952.4	3630.77	4270.08	4080.56	4401	4334.47
A	At4g17990	^ ^ ^ ^hypothetical protein contains Pfam profile PF04776: Protein of unknown function (DUF626)^	-2.47751	1	-2.63128	1.8088e-05	-1.09444	1	-1.05362	1	1.08686	1	1091.6	441.648	218.39	244.915	168.236	160.78
B	At4g18120	^ ^ ^ ^RNA recognition motif (RRM)-containing protein Mei2-like protein, Arabidopsis thaliana, gb:D86122^	-1.02638	1	-1.00884	1	1.04949	1	-1.38883	1	1.82551	2.42363e-09	2192.2	2372.09	2262.67	2097.31	1657.63	2230.57
A	At4g18200	^ ^Organic Solute Cotransporters;purine transporter activity^Purine permease family^purine permease family protein similar to purine permease [Arabidopsis thaliana] GI:7620007; contains Pfam profile PF03151: Domain of unknown function, DUF250^	-1.81519	1.95031e-05	-1.22218	1	-1.00233	1	1.04753	1	-1.00722	1	648.788	340.932	237.049	255.585	230.222	244.07
A	At4g18280	^ ^ ^ ^glycine-rich cell wall protein-related glycine-rich protein 1.0 precursor, Phaseolus vulgaris, PIR1:S01821^	-1.78671	6.49078e-07	-1.39526	1	1.06583	1	-1.1157	1	1.48267	1	672.965	442.783	365.764	333.685	297.081	455.448
D	At4g18390	^ ^TCP2^ TF ^TCP^TEO-type^TCP family transcription factor, putative similar to TFPD (GI:6681577) [Arabidopsis thaliana]; teosinte branched1 protein - Zea mays, PIR2:T04347^	-1.12219	1	1.48842	1	1.44725	1	1.54896	2.21203e-05	1.36324	1	831.294	840.007	1195.78	1757.81	2407.87	3034.2
B	At4g18400	^ ^chloroplast^ ^expressed protein ^	-1.07831	1	-1.05516	1	1.02537	1	-1.03523	1	-1.50665	0.018332	9645.09	9298.47	7636.77	7670.9	7330.53	6018.71
D	At4g18425	^ ^ ^ ^expressed protein contains Pfam profile PF05078: Protein of unknown function (DUF679)^	-1.02879	1	-1.41673	1	1.49124	1	1.66733	0.00164896	-1.57878	1	504.345	502.102	401.533	721.067	869.131	535.491
B	At4g18720	^ ^putative transcription regulator;transcription^ ^transcription elongation factor-related contains weak similarity to transcription elongation factors^	-1.05198	1	-1.06652	1	-1.24975	1	1.44766	1	1.8945	8.71913e-08	186.8	211.765	221.872	179.057	211.923	209.425
D	At4g18960	^AGAMOUS^ ^ TF ^MADS^Type II (MIKCc)^floral homeotic protein AGAMOUS (AG) contains an ACG start codon (Riechmann, Ito, and Meyerowitz, Mol Cell Biol, 1999); supported by cDNA gi|16155|emb|X53579^	5.43634	0	3.16526	1	1.02785	1	-1.12465	1	2.39019	6.8265e-08	627.014	3030.27	7103.25	7056.19	6282.56	11155.6
D	At4g18970	^ ^endomembrane system^ ^GDSL-motif lipase/hydrolase family protein similar to family II lipases EXL3 GI:15054386, EXL1 GI:15054382, EXL2 GI:15054384 from [Arabidopsis thaliana]; contains Pfam profile PF00657: GDSL-like Lipase/Acylhydrolase^	-1.72828	1	1.40595	1	3.15684	2.88814e-33	2.77367	1.6666e-07	1.71805	1	1375.12	906.321	1445.72	3938.04	5828.53	6788.88
A	At4g19230	^ ^Cytochrome P450;cytochrome P450 activity^CYP707A^cytochrome P450 family protein cytochrome P450, Arabidopsis thaliana; supported by cDNA: gi_15293092_gb_AY050980.1_^	-2.42084	1.63631e-14	1.06531	1	1.26591	1	-1.32489	1	1.01061	1	4988.41	2121.17	1998.77	1738.37	1132.06	1500.29
E	At4g19380	^ ^Acyl Lipid Metabolism^Fatty Acid Alcohol Oxidase^alcohol oxidase-related similar to long chain fatty alcohol oxidase from Candida cloacae [GI:6983581], Candida tropicalis [GI:6983594]^	-1.36178	1	1.06191	1	1.53352	1	3.13301	0.0135173	1.50309	1	32.4241	28.354	29.4774	39.7503	153.826	250.735
B	At4g19420	^ ^Carbohydrate Esterase Family 13;Carbohydrate Esterase Gene Families;endomembrane system^Carbohydrate Esterase Family 13^pectinacetylesterase family protein contains Pfam profile: PF03283 pectinacetylesterase^	1.05336	1	-1.05862	1	1.20934	0.0405833	1.05986	1	-1.1736	1	446.791	457.184	416.739	482.659	449.162	416.622
E	At4g19430	^ ^chloroplast^ ^expressed protein ^	-1.01986	1	1.04781	1	1.61527	0.0225393	1.44456	1	1.8589	3.2979e-05	147.7	174.927	192.181	347.904	517.449	772.067
B	At4g20040	^ ^endomembrane system^ ^expressed protein C70DMY30S^	1.65864	0.000137678	-1.0483	1	1.04391	1	-1.02548	1	-1.40191	1	1024.36	1499.52	1181.52	1103.56	1034.32	754.954
E	At4g20130	^ ^ ^ ^ribulose-1,5 bisphosphate carboxylase/oxygenase large subunit N-methyltransferase-related contains weak similarity to Swiss-Prot:P94026 ribulose-1,5 bisphosphate carboxylase/oxygenase large subunit N- methyltransferase, chloroplast precursor (Ribulose- bisphosphate-carboxylase]-lysine N-methyltransferase, RuBisCO methyltransferase, RuBisco LSMT, rbcMT) [Nicotiana tabacum]^	-1.0431	1	-1.0341	1	1.01642	1	1.2415	1	1.24732	0.0226538	4555.36	4740.21	4416.26	4281.05	6023.5	7179.69
D	At4g20260	^ ^ ^ ^DREPP plasma membrane polypeptide family protein contains Pfam profile: PF05558 DREPP plasma membrane polypeptide^	1.602	0.00372977	1.21357	1	1.27303	1	1.37129	0.0629407	1.00538	1	1543.95	2305.76	2607.5	3573.69	4585.56	5037.67
B	At4g20270	^ ^LRR XI & LRR XII ;endomembrane system^ ^leucine-rich repeat transmembrane protein kinase, putative CLAVATA1 receptor kinase, Arabidopsis th., PATX:G2160756^	1.05417	1	-1.21374	1	-1.69874	0.0114765	-1.07845	1	1.0895	1	12314.1	12852.3	11189.6	8747.29	9476.16	9535.04
B	At4g20720	^ ^ ^ ^dentin sialophosphoprotein-related contains weak similarity to dentin sialophosphoprotein precursor (Swiss-Prot:Q9NZW4) [Homo sapiens]^	1.0348	1	1.12031	1	-1.3577	1	-1.05907	1	1.60682	2.98256e-06	3880.68	3978.86	3620.07	2817.03	2851.29	3515.34
C	At4g21105	^ ^ ^ ^expressed protein ^	-1.57992	0.000125324	-1.21611	1	-1.16992	1	-1.01854	1	1.42408	1	19379.5	15820.7	18487.1	18706.3	17010.5	16947.7
D	At4g21200	^ ^ ^ ^oxidoreductase, 2OG-Fe(II) oxygenase family protein similar to gibberellin 20-oxidase from A. thaliana [gi:1109699], Phaseolis vulgaris [gi:2262201]; contains Pfam domain PF03171, 2OG-Fe(II) oxygenase superfamily^	-1.20389	1	1.08967	1	2.50815	8.3357e-12	1.63701	1	1.30282	1	261.897	295.21	291.302	587.434	1010.04	1035.93
D	At4g21270	^KINESIN-LIKE PROTEIN A^Kinesins;minus-end kinesin complex^Kinesin-like proteins^kinesin-like protein A (KATA) ^	-1.04831	1	-1.02004	1	-1.34525	1	-1.0789	1	1.46366	2.28777e-06	4561.63	3835.21	5226.04	5541.41	5502.31	7067.45
B	At4g21480	^ ^SUGAR TRANSPORTERS;MFS(Major Facilitator);Organic Solute Cotransporters;carbohydrate transporter activity^MONOSACCHARIDE-H+ SYMPORTERS;Putative sugar transporter family^glucose transporter, putative similar to glucose transporter (Sugar carrier) STP1, Arabidopsis thaliana, SP|P23586; contains Pfam profile PF00083: major facilitator superfamily protein^	2.32287	3.03012e-10	1.10746	1	-1.56115	7.38371e-06	-1.51896	0.0168607	-1.17127	1	609.481	1343.62	1384.09	906.293	656.889	528.877
B	At4g21490	^ ^Chloroplast and Mitochondria gene families;NADH dehydrogenase activity^Putative NADH dehydrogenase family^pyridine nucleotide-disulphide oxidoreductase family protein similar to GI:3718005 alternative NADH-dehydrogenase {Yarrowia lipolytica}; contains Pfam profile PF00070: Pyridine nucleotide-disulphide oxidoreductase^	1.21312	1	1.06032	1	-1.5205	0.0363461	-1.21859	1	1.29101	1	438.601	596.136	704.299	473.645	365.925	312.13
B	At4g21560	^ ^ ^ ^vacuolar protein sorting-associated protein 28 family protein / VPS28 family protein contains similarity to Swiss-Prot:Q02767 vacuolar protein sorting-associated protein VPS28 [Saccharomyces cerevisiae]^	1.49255	1.11317e-05	-1.17442	1	-1.14496	1	-1.62384	1.60658e-06	-1.10379	1	9174.06	12218.3	12081	11758.8	8775.44	6876.68
D	At4g21590	^ ^nuclease activity^ ^bifunctional nuclease, putative similar to bifunctional nuclease [Zinnia elegans] gi|4099833|gb|AAD00694^	1.68854	0.000142936	3.24355	1.29431e-24	1.5431	1	1.34851	1	-1.38504	1	1855.23	3443.3	9290.64	12523.3	13301	12295.8
B	At4g21690	^ ^GA^putative gibberellin 3-beta-hydroxylase^gibberellin 3 beta-hydroxylase family protein similar to gibberellin 3 beta-hydroxylase [GI:4164145][Lactuca sativa], 3b-hydroxylase, Solanum lycopersicum, AB010992; contains PF03171 2OG-Fe(II) oxygenase superfamily domain^	1.17911	1	-1.16041	1	-1.4916	1	-2.66709	4.3806e-17	-1.18128	1	456.862	575.372	548.511	375.323	163.884	124.343
D	At4g21850	^ ^ ^ ^methionine sulfoxide reductase domain-containing protein / SeIR domain-containing protein low similarity to pilin-like transcription factor [Homo sapiens] GI:5059062, SP|P14930 Peptide methionine sulfoxide reductase msrA/msrB (EC 1.8.4.6) {Neisseria gonorrhoeae}; contains Pfam profile PF01641: SelR domain^	-1.49268	0.00739883	2.70902	0.000278922	1.79417	3.09442e-07	1.1713	1	-1.51812	1	828.056	600.97	1673.11	3139.79	3558.25	2712.32
E	At4g21970	^ ^ ^ ^expressed protein contains Pfam profile PF04520: Protein of unknown function, DUF584; expression supported by MPSS^	-1.43316	2.63163e-05	-1.0043	1	1.53865	1	1.40767	0.78531	1.32076	1	2315.4	1868.43	1826.41	2410.21	3060.44	3860.78
D	At4g22230	^ ^endomembrane system^ ^expressed protein ^	1.052	1	1.15985	1	1.6998	1	1.21361	1	-1.78777	0.0149043	356.178	399.442	453.432	845.207	1099.27	688.95
A	At4g22490	^ ^Acyl Lipid Metabolism;endomembrane system^Lipid Transfer Protein type 6^protease inhibitor/seed storage/lipid transfer protein (LTP) family protein contains Pfam protease inhibitor/seed storage/LTP family domain PF00234^	-1.9661	9.80212e-10	-2.18836	0.0409262	1.38305	1	-5.21841	0	-2.72217	1.50499e-06	9108.56	5905.02	2952.47	2758.26	918.258	687.067
B	At4g22540	^ ^steroid metabolism^ ^oxysterol-binding family protein similar to SP|P16258 Oxysterol-binding protein 1 {Oryctolagus cuniculus}; contains Pfam profiles PF00169: PH domain, PF01237: Oxysterol-binding protein^	-1.0245	1	-1.32724	1	-1.41798	1	-1.5578	0.006606	1.01422	1	2697.95	2463.07	2142.83	1693.91	1066.22	983.143
A	At4g22570	^ ^adenine phosphoribosyltransferase activity;nucleotide metabolism^ADENINE PHOSPHORIBOSYLTRANSFERASE^adenine phosphoribosyltransferase, putative strong similarity to Adenine phosphoribosyltransferase [Hordeum vulgare subsp. vulgare] GI:9711921; contains Pfam profile PF00156: Phosphoribosyl transferase domain^	-2.35466	1.69933e-28	-1.49507	1	1.10167	1	1.11069	1	1.19775	1	15925.9	8179.48	7095.07	6989.35	8914.12	11872.4
E	At4g22753	^ ^metabolism^ ^sterol desaturase family protein similar to sterol 4-alpha-methyl-oxidase GI:16973471 from [Arabidopsis thaliana]; contains Pfam profile PF01598: Sterol desaturase^	1.10771	1	1.05117	1	1.30666	1	2.36172	6.23306e-08	1.4151	1	696.526	856.763	844.277	969.139	2151.8	2489.26
E	At4g22870	^ ^anthocyanin biosynthesis^ANTHOCYANIDIN SYNTHASE^leucoanthocyanidin dioxygenase, putative / anthocyanidin synthase, putative similar to SP|P51091 [Malus domestica]; contains Pfam domain PF03171, 2OG-Fe(II) oxygenase superfamily^	-4.02212	1.77069e-10	-1.46115	1	2.28703	1.32707e-05	7.15779	0	2.03446	1	932.551	311.317	268.824	526.046	3239.01	4970.98
E	At4g22880	^TANNIN DEFICIENT SEED 4^cellular_component unknown;anthocyanin biosynthesis^LEUCOANTHOCYANIDIN DIOXYGENASE^leucoanthocyanidin dioxygenase, putative / anthocyanidin synthase, putative similar to SP|P51091 [Malus domestica]; contains PF03171 2OG-Fe(II) oxygenase superfamily^	-2.01171	1	-1.10423	1	1.41983	1	6.16633	0	1.92985	4.69022e-07	940.416	522.769	333.905	767.032	4030.98	6202.07
B	At4g22950	^ ^AGL19^ TF ^MADS^Type II (MIKCc)^MADS-box protein (AGL19) MADS-box protein AGL14, Arabidopsis thaliana, gb:U20184^	1.46633	0.0041755	-1.08515	1	-1.02879	1	-1.17686	1	-1.22002	1	469.155	560.142	528.194	573.856	434.997	282.906
C	At4g23000	^ ^ ^ ^calcineurin-like phosphoesterase family protein contains Pfam profile: PF00149 calcineurin-like phosphoesterase^	1.11564	1	1.63535	1.39242e-17	-1.05917	1	1.05505	1	-1.28521	1	283.219	329.37	506.618	393.2	386.441	379.201
B	At4g23050	^ ^CTR1/EDR1-like Protein Kinase ;MAPKKK;protein serine/threonine kinase activity^Raf subfamily^protein kinase, putative similar to MAP3K delta-1 protein kinase [Arabidopsis thaliana] gi|2253010|emb|CAA74591; contains Pfam PF00069 Protein kinase domain and PF00989 PAS domain^	1.47243	2.18169e-07	1.02498	1	-1.03039	1	1.02822	1	-1.03035	1	669.06	1066.67	977.874	892.356	839.607	691.993
A	At4g23170	^ ^endomembrane system^ ^protein kinase family protein contains Pfam PF01657: Domain of unknown function; similar to receptor-like protein kinase 5 (GI:13506747) {Arabidopsis thaliana}; similar to receptor-like protein kinase 4 (GI:13506745) [Arabidopsis thaliana]^	-1.05563	1	-1.74803	1.75833e-05	1.24466	1	-1.02971	1	1.99769	0.26238	222.512	179.412	108.376	131.741	126.3	218.279
A	At4g23180	^CYSTEINE-RICH RLK10^DUF26 Kinase ;protein serine/threonine kinase activity^ ^receptor-like protein kinase 4, putative (RLK4) nearly identical to receptor-like protein kinase 4 [Arabidopsis thaliana] GI:13506745; contains Pfam domain, PF00069: Protein kinase domain; identical to cDNA receptor-like protein kinase 4 (RLK4) GI:13506744^	-1.0036	1	-1.12792	1	-1.04507	1	1.14367	1	1.54693	1.13195e-09	610.539	611.744	514.396	438.673	531.324	679.112
A	At4g23340	^ ^receptor activity^ ^oxidoreductase, 2OG-Fe(II) oxygenase family protein similar to gibberellin c20-oxidase [Pisum sativum] GI:6855711; contains Pfam profile PF03171: oxidoreductase, 2OG-Fe(II) oxygenase family^	-2.90675	5.99513e-14	-1.44728	1	-1.01298	1	-1.24894	1	1.08078	1	780.36	274.136	178.071	149.514	113.226	153.449
B	At4g23400	^PIP1;5^MIP(The Major Intrinsic Protein);Aquaporin Families;MIP family;water channel activity^Delta tonoplast integral protein family^major intrinsic family protein / MIP family protein contains Pfam profile: MIP PF00230^	1.2843	0.000831649	-1.14375	1	1.2199	1	-1.11834	1	1.02699	1	5451.27	7132.66	4590.82	5054.4	5168.08	5022.53
E	At4g23600	^CORONATINE INDUCED 1^ tyrosine degradation 1;phenylalanine biosynthesis, Bacillus subtilis ^TYROSINE TRANSAMINASE^coronatine-responsive tyrosine aminotransferase / tyrosine transaminase similar to nicotianamine aminotransferase from Hordeum vulgare [GI:6498122, GI:6469087]; contains Pfam profile PF00155 aminotransferase, classes I and II; identical to cDNA coronatine-regulated tyrosine aminotran…	-1.79007	1	-1.18466	1	7.85776	0	5.49306	4.54138e-18	1.3385	1	546.662	355.054	367.388	2524.17	11168.6	13404.8
D	At4g23630	^ ^molecular_function unknown^ ^reticulon family protein (RTNLB1) weak similarity to Nogo-C protein [Rattus norvegicus] GI:6822251; contains Pfam profile PF02453: Reticulon^	-1.06929	1	1.43557	0.00137456	1.19854	1	1.07166	1	-1.01109	1	24024.5	23506.7	24794	25054.5	26689.4	23150.6
E	At4g23670	^ ^ ^ ^major latex protein-related / MLP-related low similarity to major latex protein {Papaver somniferum}[GI:294060] contains Pfam profile PF00407: Pathogenesis-related protein Bet v I family^	-1.42485	1	-2.15255	1.60912e-07	-1.12959	1	2.98476	0	1.08653	1	24034.2	20673.6	14726.2	11445.2	25190.6	26105.7
E	At4g23680	^ ^ ^ ^major latex protein-related / MLP-related low similarity to major latex protein {Papaver somniferum}[GI:294060] ; contains Pfam profile PF00407: Pathogenesis-related protein Bet v I family^	-1.29242	1	-1.27638	1	1.0469	1	2.75027	1	1.96246	0.00756699	79.178	61.9015	55.3822	55.9283	136.073	276.59
E	At4g23810	^ ^AtWRKY53^ TF ^WRKY^ ^WRKY family transcription factor AR411 - Arabidopsis thaliana (thale cress), PID:g1669603^	1.08731	1	-1.12519	1	-1.1588	1	1.23701	0.046376	1.30851	1	255.684	309.392	259.273	254.905	357.689	521.865
A	At4g23830	AT4G23830_1 hypothetical protein	-1.21826	1	1.38709	1	-1.8589	1	-1.58566	1	2.19764	0.00183714	618.854	519.131	491.217	316.39	424.553	545.361
D	At4g24130	^ ^ ^ ^expressed protein contains Pfam profile PF04398: Protein of unknown function, DUF538^	1.98597	0.00124446	1.92368	7.75922e-09	1.83014	3.44391e-09	1.48992	0.00184189	1.15835	1	817.244	1749.45	3082.36	4933.25	6844.83	7875.77
E	At4g24140	^ ^endomembrane system^ ^hydrolase, alpha/beta fold family protein low similarity to 2-hydroxy-6-oxo-7-methylocta-2,4-dienoate hydrolase [Pseudomonas putida] GI:2822275, hydroxymuconic semialdehyde hydrolase, Pseudomonas stutzeri, AF039534; contains Pfam profile PF00561: hydrolase, alpha/beta fold family^	1.20775	1	1.27295	1	-1.08308	1	1.21037	1	2.39377	0.00236115	351.071	353.94	370.258	375.262	426.826	1173.5
E	At4g24150	^ ^AtGRF8^ TF ^GRF/ENBP (C3H-type 2; Zn)^GRF-like^expressed protein ; expression supported by MPSS^	1.44925	1	1.20281	1	2.21838	4.18735e-07	1.83797	1	1.78905	0.040343	123.983	213.809	285.289	697.988	1264.38	2061.17
E	At4g24510	^ECERIFERUM 2^Acyl Lipid Metabolism^Putative Transcription Factor CER2 involved in wax biosynthesis^eceriferum protein (CER2) identical to (CER2) [Arabidopsis thaliana] GI:1213594; contains Pfam profile PF02458: Transferase family^	-1.37645	1	1.03189	1	1.30734	1	1.36112	1	1.45806	0.000355757	1990.16	1583.52	1712.51	2319.15	2589.35	4151.1
A	At4g24540	^ ^AGL24^ TF ^MADS^Type II (MIKCc)^MADS-box family protein ^	-1.71097	9.70531e-06	-1.43023	0.26297	1.07282	1	-1.81522	0.78531	-1.48469	0.0139815	7005.63	4566.8	3424.04	2474.44	1497.26	1036.16
D	At4g24700	^ ^ ^ ^expressed protein ^	1.6689	0.12434	1.17253	1	1.56155	0.00512975	1.25018	0.78531	-1.01491	1	429.424	735.618	952.683	1235.84	1326.13	1347.02
D	At4g25000	^ALPHA-AMYLASE-LIKE^Glycoside Hydrolase Family 13;Glycoside Hydrolase Gene Families;alpha-amylase activity;glycogen catabolism^Glycoside Hydrolase Family 13;ALPHA-AMYLASE^alpha-amylase, putative / 1,4-alpha-D-glucan glucanohydrolase, putative similar to alpha-amylase from Vigna mungo SP|P17859, Ipomoea nil GI:21670851; contains Pfam profile PF00128: Alpha amylase, catalytic domain^	-1.06697	1	1.62294	1.59693e-08	1.31033	1	1.00595	1	-1.1821	1	558.382	537.234	780.083	1008.11	949.367	736.737
B	At4g25100	^FE SUPEROXIDE DISMUTASE 1^circadian rhythm;removal of superoxide radicals^SUPEROXIDE DISMUTASE^superoxide dismutase [Fe], chloroplast (SODB) / iron superoxide dismutase (FSD1) identical to Fe-superoxide dismutase [Arabidopsis thaliana] gi|166700|gb|AAA32791; supported by cDNA, Ceres:32935^	1.38411	1	-1.2618	1	-1.1157	1	-4.13039	2.03247e-37	-3.30438	2.30758e-23	2827.6	3654.81	3116.94	3328.95	1116.23	524.15
B	At4g25170	^ ^mitochondrion^ ^expressed protein ^	1.48878	0.000138463	-1.65802	1	-1.00144	1	-1.01795	1	-1.05757	1	3433.09	4427.41	2939.5	3228.51	2464.27	3172.12
A	At4g25430	^ ^ ^ ^hypothetical protein ^	-2.59726	7.14622e-17	-1.0655	1	-1.0056	1	-1.2429	1	1.23345	1	591.481	269.951	223.671	172.526	147.242	182.064
E	At4g25620	^ ^mitochondrion^ ^hydroxyproline-rich glycoprotein family protein contains proline-rich extensin domains, INTERPRO:IPR002965; Common family member At5g52430 [Arabidopsis thaliana];^	1.2625	1	-1.40457	1	1.19115	1	2.46359	3.96504e-07	1.26027	1	533.617	660.618	472.372	608.999	1447.99	1885.95
A	At4g25750	^ ^ABC(ATP-Binding Cassette);ABC Superfamily;ABC transporters;ATP-binding cassette (ABC) transporter activity^WBC subfamily;Putative ABC transporter^ABC transporter family protein Bactrocera tryoni membrane transporter (white) gene, PID:g3676298^	-1.90242	4.58433e-07	-1.23534	1	-1.01855	1	-1.37889	1	1.53387	1	1553.78	851.551	674.455	741.836	528.841	661.318
A	At4g25780	^ ^endomembrane system^ ^pathogenesis-related protein, putative similar to gene PR-1 protein - Medicago truncatula, SP|Q40374; contains Pfam profile PF00188: SCP-like extracellular protein^	-1.36068	0.00233446	1.03099	1	-1.15311	1	-1.57352	3.12285e-12	-1.53295	0.254547	1346.27	1056.99	985.372	732.247	422.295	286.122
B	At4g25970	^PHOSPHATIDYLSERINE DECARBOXYLASE 2^EF-hand containing proteins:Group III;phospholipid biosynthesis;phospholipid biosynthesis II^PHOSPHATIDYLSERINE DECARBOXYLASE^phosphatidylserine decarboxylase, putative similar to SP|P53037 Phosphatidylserine decarboxylase proenzyme 2 precursor (EC 4.1.1.65) {Saccharomyces cerevisiae}; contains Pfam profile PF02666: phosphatidylserine decarboxylase^	-1.05005	1	-1.43349	1	-1.51252	4.18939e-08	1.01404	1	1.0712	1	5686.42	5686.85	5735.22	4152.73	5484	4644.72
C	At4g25990	^ ^chloroplast^ ^expressed protein ^	3.69414	1.54714e-12	-1.297	0.0280116	-1.09838	1	1.03276	1	1.20456	1	375.998	1113.85	823.075	664.901	812.485	966.104
E	At4g26120	^ ^NPR1-like;protein binding activity^ ^ankyrin repeat family protein / BTB/POZ domain-containing protein contains Pfam domain, PF00023: Ankyrin repeat and Pfam domain, PF00651: BTB/POZ domain^	1.53803	1	1.3159	1	1.24818	1	1.88807	1	1.6096	0.0091785	44.4526	58.8069	72.9944	85.6105	143.444	213.521
D	At4g26280	^ ^sulfotransferase activity^ ^sulfotransferase family protein similar to steroid sulfotransferase 3 [Brassica napus] GI:3420008; contains Pfam profile PF00685: Sulfotransferase domain^	-1.25494	1	2.32465	1.53991e-07	2.88264	3.5036e-36	1.21343	1	-1.02414	1	572.106	492.774	902.276	2311.13	3062.9	3273.59
A	At4g26320	^ARABINOGALACTAN PROTEIN 13^GPI-anchored protein;Structural proteins;endomembrane system^AG peptides;Arabinogalactan-proteins (AGPs)^arabinogalactan-protein (AGP13) identical to gi|10880503|gb|AAG24281^	-1.43274	1	-1.4039	1	1.60977	1.85565e-09	-1.09993	1	-1.22025	1	3895.99	3365.09	1904.42	2577.02	2342.92	1977.44
E	At4g26540	^ ^LRR XI & LRR XII ;Receptor kinase-like protein family;kinase activity^ ^protein kinase family protein Three false introns were added with non-consensus splice sites to circumenvent frameshifts likely due to sequencing errors; this is extremely unusual and is under investigation.^	-1.12587	1	1.2042	1	1.32526	0.00523587	2.09024	5.40163e-07	1.2416	1	353.59	428.726	487.33	761.336	1817.85	2209.94
B	At4g27280	^ ^EF-hand containing proteins:Group III;chloroplast^ ^calcium-binding EF hand family protein similar to EF-hand Ca2+-binding protein CCD1 [Triticum aestivum] GI:9255753; contains INTERPRO:IPR002048 calcium-binding EF-hand domain^	1.6333	0.0371429	1.14332	1	-1.19331	1	1.1599	1	-1.12677	1	4803.4	5338.47	4845.48	4141.41	3296.22	3144.94
A	At4g27300	^ ^DUF26 Kinase ;receptor activity^ ^S-locus protein kinase, putative similar to receptor protein kinase [Ipomoea trifida] gi|836954|gb|AAC23542; contains S-locus glycoprotein family domain, Pfam:PF00954^	-2.00454	1.67095e-06	-1.18035	1	1.27835	1	1.04478	1	1.19062	1	316.435	151.105	111.751	162.934	187.24	218.929
E	At4g27330	^SPOROCYTELESS/NOZZLE^ ^ TF ^SPL/NZZ^ ^sporocyteless (SPL) identical to sporocyteless SPL (MADS-box related protein) [Arabidopsis thaliana] gi|5566240|gb|AAD45344^	-1.00017	1	-1.03477	1	1.08638	1	1.25616	1	1.52298	0.0466572	462.452	474.085	452.735	482.143	707.071	1085.58
E	At4g27520	^ ^GPI-anchored protein;Blue copper binding protein family;endomembrane system^Early nodulin like Phytocyanins^plastocyanin-like domain-containing protein similar to PIR|JC7196 phytocyanin-related protein Pn14 {Ipomoea nil}; contains Pfam profile PF02298: Plastocyanin-like domain^	-2.02197	0.00669145	1.41105	1	1.91382	1	-1.1764	1	1.63651	0.148018	10543.1	7049.83	9015.58	15629.1	13729	18037.6
E	At4g27710	^ ^Cytochrome P450;cytochrome P450 activity^CYP709B^cytochrome P450 family protein contains Pfam profile: PF00067 cytochrome P450^	-1.1468	1	-1.41111	1	-1.05672	1	1.09596	1	2.34009	0.00338995	258.34	266.391	231.898	180.174	225.724	384.555
D	At4g27890	^ ^ ^ ^nuclear movement family protein contains Pfam profile: PF03593 nuclear movement protein^	1.09061	1	1.05264	1	1.17198	1	1.34237	1	1.59859	7.85539e-13	369.446	352.568	408.404	581.694	842.856	959.798
C	At4g27980	^ ^ ^ ^expressed protein ^	2.48919	6.631e-08	1.48515	1	1.00933	1	-1.56336	1	1.36227	0.52402	445.689	1053.3	1286.38	1255.94	1287.05	1380.37
D	At4g28160	^ ^Structural proteins;endomembrane system^Hydroxyproline-rich glycoproteins (HRGPs)^hydroxyproline-rich glycoprotein family protein similar to Putative cell wall protein precursor (Swiss-Prot:P47925) [Arabidopsis thaliana]^	2.28643	2.58387e-10	1.68585	0.26297	1.38405	1	1.63652	9.10116e-05	-1.03184	1	254.175	470.125	584.167	791.318	1279.72	1279.85
B	At4g28430	^ ^chloroplast^ ^reticulon family protein contains Pfam profile PF02453: Reticulon^	-1.07285	1	1.09889	1	-1.09893	1	-1.06115	1	1.53441	0.0130589	691.439	684.967	647.948	582.102	595.528	622.1
A	At4g28490	^CYSTEINE-RICH RLK 6^LRR XI & LRR XII ;Receptor kinase-like protein family;kinase activity^ ^leucine-rich repeat transmembrane protein kinase, putative ^	-1.29027	1	-1.71806	0.0156061	1.05377	1	1.03174	1	1.08548	1	2446.18	2221.25	1254.48	1019.14	938.94	1031.91
E	At4g28780	^ ^endomembrane system^ ^GDSL-motif lipase/hydrolase family protein similar to family II lipase EXL3 (GI:15054386), EXL1 (GI:15054382), EXL2 (GI:15054384) [Arabidopsis thaliana]; contains Pfam profile PF00657: Lipase/Acylhydrolase with GDSL-like motif^	-1.22341	1	1.03354	1	1.34202	1	1.44642	0.0115931	2.62533	6.06092e-05	424.819	362.413	410.99	540.016	1197.42	4076.34
E	At4g29270	^ ^acid phosphatase activity^ ^acid phosphatase class B family protein similar to acid phosphatase [Glycine max] GI:3341443; contains Pfam profile PF03767: HAD superfamily (subfamily IIIB) phosphatase^	1.06744	1	1.11963	1	1.29932	1	1.63508	0.00908573	-1.01037	1	130.497	146.352	148.087	187.279	281.831	312.226
B	At4g29390	^ ^ribosome^ ^40S ribosomal protein S30 (RPS30B) RIBOSOMAL PROTEIN S30 - Arabidopsis thaliana,PID:e1358183^	1.12059	1	-1.2935	1	1.04419	1	1.19938	1	-1.50599	0.00621998	3966.01	3595.82	3361.69	3703.11	3483.03	2979.98
E	At4g29700	^ ^nucleotide pyrophosphatase activity^ ^type I phosphodiesterase/nucleotide pyrophosphatase family protein similar to SP|P22413 Ectonucleotide pyrophosphatase/phosphodiesterase 1 (Plasma-cell membrane glycoprotein PC-1) [Includes: Alkaline phosphodiesterase I (EC 3.1.4.1); Nucleotide pyrophosphatase (EC 3.6.1.9) {Homo sapiens}; contains Pfam profile PF01663: Type I phosphodiesterase / nucleotide…	-1.05807	1	-1.02466	1	-1.15438	1	1.63877	0.52438	1.85569	1.66838e-09	852.023	828.751	752.041	790.087	1516.42	2272.02
A	At4g29810	^MAP KINASE KINASE 1^MAPKK ;MAP Kinase Kinase;MAP kinase kinase activity^ ^mitogen-activated protein kinase kinase (MAPKK) (MKK2) identical to MAP kinase kinase 2 [Arabidopsis thaliana] gi|3219267|dbj|BAA28828; mitogen-activated protein kinase kinase (MAPKK) family, PMID:12119167^	-1.17767	1	1.12761	1	1.03751	1	-1.03439	1	1.40929	0.0482278	7331.15	6110.07	6383.98	6298.61	6103.03	7249.7
C	At4g30110	^ ^Primary Pumps (ATPases) Gene Families;cadmium-transporting ATPase activity^Cadmium-transporting ATPase-like family^ATPase E1-E2 type family protein / haloacid dehalogenase-like hydrolase family protein / heavy-metal-associated domain-containing protein similar to cadmium efflux pump protein from Geobacillus stearothermophilus [GI:16753175], cadmium resistance protein B from Staphylococcus aure…	1.31634	1	1.30042	1	1.05429	1	-1.02192	1	-1.49875	1.88111e-05	753.146	985.721	1210.01	1185.4	1219.81	869.298
D	At4g30180	^ ^BHLH146^ TF ^bHLH^(-b)HLH^expressed protein ^	-1.38808	1	1.50667	0.52544	1.76391	0.0045721	1.40033	1	-1.27218	1	803.15	669.425	1093.93	1820.67	2494.38	1823.22
D	At4g30270	^BRU1^ Assembly, Architecture, and Growth;Glycoside Hydrolase Family 16;GA;Glycoside Hydrolase Gene Families;endomembrane system ^ Growth modifying proteins;xyloglucan endo1,4-beta-D-gglucanase;Glycoside Hydrolase Family 16 ^MERI-5 protein (MERI-5) (MERI5B) / endo-xyloglucan transferase / xyloglucan endo-1,4-beta-D-glucanase (SEN4) identical to endo-xyloglucan transferase gi:944810, SP|P24806 MER…	2.23143	6.40187e-06	1.82879	2.62028e-08	1.45871	1	1.06229	1	-1.29404	1	1145.26	3272.4	5815.19	7816.08	8292.04	6557.43
E	At4g30350	^ ^ATP binding activity^ ^heat shock protein-related contains similarity to heat shock protein 101 [Triticum aestivum] gi|6013196|gb|AAF01280^	1.08033	1	1.01207	1	1.59488	1	1.39224	1.38133e-05	1.16285	1	3441.09	3145.96	2724.98	3009.33	4290.28	5599.98
B	At4g30410	^ ^ ^ ^expressed protein similar to cDNA bHLH transcription factor (bHLH eta gene) gi:32563007^	1.86181	1.05232e-13	-1.09707	1	-1.4122	1	-1.00306	1	-1.33336	1	659.532	1229.8	1229.08	853.102	763.546	704.73
A	At4g30450	^ ^endomembrane system^ ^glycine-rich protein ^	-1.17701	1	-1.5225	4.81713e-06	1.77667	0.0313125	1.46136	1	1.06137	1	4603.94	3643.65	2729.23	4067.56	5215.15	3820.1
A	At4g30490	^ ^mitochondrion^ ^AFG1-like ATPase family protein contains Pfam profile: PF03969 AFG1-like ATPase^	1.00453	1	-1.62585	5.12083e-09	1.33242	1	1.05152	1	1.12587	1	2728.61	2535.48	1618.4	1721.52	1928.34	2218.19
E	At4g30650	^ ^endomembrane system^ ^hydrophobic protein, putative / low temperature and salt responsive protein, putative similar to SP|Q9ZNQ7 Hydrophobic protein RCI2A (Low temperature and salt responsive protein LTI6A) {Arabidopsis thaliana}; contains Pfam profile PF01679: Uncharacterized protein family^	-1.00087	1	1.838	0.0025424	1.1573	1	1.12504	1	1.18359	1	10384.6	10055.3	12309.3	11473.7	12289.8	16183.2
C	At4g31140	^ ^Glycoside Hydrolase Family 17;GPI-anchored protein;Hydrolases;Glycoside Hydrolase Gene Families;endomembrane system^ b-1,3 Glucanases;Endo-acting glucanases;Glycoside Hydrolase Family 17 ^glycosyl hydrolase family 17 protein similar to elicitor inducible chitinase Nt-SubE76 GI:11071974 from [Nicotiana tabacum]^	-1.34005	0.0488668	1.08513	1	1.06105	1	-1.02537	1	1.13948	1	2692.32	2290.09	2654.34	2838.03	2767.65	2968.09
C	At4g31380	^FPF1-LIKE PROTEIN 1^chloroplast^ ^hypothetical protein ^	1.86224	1	4.19556	5.44068e-09	1.14829	1	-1.30537	1	1.10159	1	35.2368	56.8546	201.78	183.3	132.135	129.96
B	At4g31610	^REPRODUCTIVE MERISTEM 1^B3 transcription factor family^ ^transcriptional factor B3 family protein / reproductive meristem protein 1 (REM1) similar to reproductive meristem gene 1 from [Brassica oleracea var. botrytis] GI:3170424; contains Pfam profile PF02362: B3 DNA binding domain; identical to cDNA reproductive meristem protein 1 (REM1) GI:13604226^	-1.02353	1	1.0582	1	-1.24314	1	-1.69793	2.9055e-09	-1.12501	1	4491.71	5211.8	5404.08	4578.94	3722.54	3477.9
B	At4g31620	^ ^B3 transcription factor family;mitochondrion^ ^transcriptional factor B3 family protein low similarity to reproductive meristem gene 1 from [Brassica oleracea var. botrytis] GI:3170424, [Arabidopsis thaliana] GI:13604227; contains Pfam profile PF02362: B3 DNA binding domain^	1.15469	1	-1.41443	1	-1.58519	2.52171e-11	-1.91039	2.53841e-12	-1.27465	1	12202.5	12262	9969.4	6985.79	4116.55	3077.5
E	At4g31805	^ ^WRKY domain transcription factor family;mitochondrion^ ^WRKY family transcription factor identical to WRKY DNA-binding protein 18 (WRKY18) GI:13506730 from [Arabidopsis thaliana]^	1.01332	1	-1.25188	1	1.29327	1	2.93113	3.2028e-12	-1.23292	1	750.903	757.411	700.693	983.296	2429.37	2245.51
A	At4g31890	^ ^chloroplast^ ^armadillo/beta-catenin repeat family protein contains Pfam profile: PF00514 armadillo/beta-catenin-like repeat^	-1.61372	0.00010634	-1.22126	1	-1.19401	1	-1.03723	1	-1.03085	1	4139.63	2782.66	2171.48	1909.31	1902.35	2038.43
B	At4g31910	^ ^Nitrate Metabolism^NO3resp-putative pr^transferase family protein low similarity to anthranilate N-hydroxycinnamoyl/benzoyltransferase Dianthus caryophyllus GI:3288180, 10-deacetylbaccatin III-10-O-acetyl transferase Taxus cuspidata GI:6746554; contains Pfam profile PF02458 transferase family^	-1.48275	0.108737	-1.13509	1	-1.55202	0.073695	-1.76739	1.47236e-07	-1.41955	1	14820.8	14006.6	13758.1	11867.7	7672.42	6304.51
E	At4g32000	^ ^Unknown ;protein serine/threonine kinase activity^ ^protein kinase family protein contains protein kinase domain, Pfam:PF00069^	1.06331	1	1.09443	1	1.38393	0.0363461	1.85158	0.00702825	1.32017	1	309.734	300.287	322.212	477.272	745.083	897.671
D	At4g32480	^ ^ ^ ^expressed protein contains Pfam profile PF04720: Protein of unknown function (DUF506)^	-2.72574	4.03651e-09	3.60815	0.78708	1.68884	1	1.31199	1	1.03351	1	3331.49	1336.04	2704.25	5047.77	6326.06	6370.21
B	At4g32520	^ ^glycine hydroxymethyltransferase activity;formylTHF biosynthesis;serine-isocitrate lyase pathway;folic acid biosynthesis;glycine biosynthesis I^GLYCINE HYDROXYMETHYLTRANSFERASE^glycine hydroxymethyltransferase, putative / serine hydroxymethyltransferase, putative / serine/threonine aldolase, putative similar to serine hydroxymethyltransferase [Chlamydomonas reinhardtii] GI:17066746; contains P…	1.01578	1	1.033	1	1.16918	1	-1.23725	1	1.35305	2.48747e-05	10172.8	10693.5	10617.8	10479.6	9205.04	10982.9
C	At4g32540	^YUCCA^auxin biosynthesis^ ^flavin-containing monooxygenase / FMO (YUCCA) identical to gi:16555352^	1.5204	0.152908	1.44801	6.22066e-05	-1.035	1	-1.24708	1	-1.01056	1	335.151	561.487	866.645	875.786	666.446	733.077
C	At4g32690	^ ^response to hypoxia^ ^2-on-2 hemoglobin (GLB3) identical to 2-on-2 hemoglobin (GLB3) GI:14165163 from [Arabidopsis thaliana]^	-1.05379	1	1.01798	1	1.06091	1	1.12385	1	-1.56968	6.2232e-11	4659.37	4719.38	4521.38	5486.29	5495.31	4142.22
B	At4g32920	^ ^endomembrane system^ ^glycine-rich protein ^	-1.00113	1	1.01153	1	1.12573	1	-1.08516	1	-1.52319	0.00899368	2338.99	2721.23	2345.57	2120.45	2182.55	2071.12
D	At4g32950	^ ^PP2C (Protein Phosphatase 2C) Phosphatases^ ^protein phosphatase 2C, putative / PP2C, putative phosphoprotein phosphatase, Arabidopsis thaliana, PIR2:S55457^	2.02888	0.00123666	1.44809	1	1.43369	0.000120097	1.02495	1	-1.60766	0.0004937	467.422	926.08	1212.91	1632.89	2040.54	1378.79
C	At4g32980	^ ^ATH1^ TF ^HB^HD-BELL^homeobox protein (ATH1) identical to SWISS-PROT:P48731 homeobox protein ATH1. [Arabidopsis thaliana]^	5.43258	0	1.76501	1	1.29887	1	-1.25141	1	-1.47074	1	1097.55	5265.15	6769.06	7464.35	6900.48	5593.8
D	At4g32990	^ ^ ^ ^transducin family protein / WD-40 repeat family protein HIRA protein, Drosophila melanogaster, PID:e1250847^	4.84711	6.24338e-06	2.3567	0.00490139	1.12551	1	1.52598	1	1.02178	1	68.8579	257.594	497.83	646.29	659.11	525.986
C	At4g33000	^ATCBL10^EF-hand containing proteins:Group III;calcium ion binding activity^ ^calcineurin B-like protein 10 (CBL10) identical to calcineurin B-like protein 10 [Arabidopsis thaliana] GI:29150248^	1.52533	0.000534621	1.09602	1	1.08018	1	1.00805	1	-1.12236	1	4206.8	6029.77	6414.48	6091.57	6336.06	5855.52
C	At4g33010	^ ^mitochondrion^ ^glycine dehydrogenase [decarboxylating], putative / glycine decarboxylase, putative / glycine cleavage system P-protein, putative strong similarity to SP|P49361 Glycine dehydrogenase [decarboxylating] A, mitochondrial precursor (EC 1.4.4.2) {Flaveria pringlei}; contains Pfam profile PF02347: Glycine cleavage system P-protein^	1.38652	2.5234e-05	1.02496	1	1.26012	1	-1.04042	1	-1.16407	1	14925.6	18470.6	17936.3	18312.6	18393.8	16655.1
E	At4g33150	^LYSINE-KETOGLUTARATE REDUCTASE/SACCHAROPINE DEHYDROGENASE^cytoplasm;Lysine degradation 1^LYSINE-KETOGLUTARATE REDUCTASE^lysine-ketoglutarate reductase/saccharopine dehydrogenase bifunctional enzyme identical to lysine-ketoglutarate reductase/saccharopine dehydrogenase GI:2052508 from [Arabidopsis thaliana]^	-1.34679	1	-1.0017	1	1.00462	1	-1.00449	1	1.80142	0.000735075	1581.31	1343.82	1265.82	1231.77	1464.01	2151.74
B	At4g33320	^ ^ ^ ^expressed protein contains Pfam profile PF04859: Plant protein of unknown function (DUF641^	1.00391	1	1.16247	1	-1.17529	1	-1.21609	1	1.57894	1.98537e-13	2171.97	2405.32	2801.02	2529.85	2085.04	2433.09
B	At4g33430	^BRI1-ASSOCIATED RECEPTOR KINASE^BR signaling;LRR II & LRR X ;Receptor kinase-like protein family;kinase activity^putative member of the BR receptor complex^brassinosteroid insensitive 1-associated receptor kinase 1 (BAK1) / somatic embryogenesis receptor-like kinase 3 (SERK3) identical to SP|Q94F62 BRASSINOSTEROID INSENSITIVE 1-associated receptor kinase 1 precursor (EC 2.7.1.37) (BRI1-associate…	1.14778	1	1.07974	1	1.0402	1	-1.03169	1	-1.48039	0.0421856	6506.74	6864.67	5836.22	5588.67	5894.32	5363.04
A	At4g33560	^ ^chloroplast^ ^expressed protein ^	-1.26099	1	-1.49494	1	1.86316	2.12564e-10	1.41745	1	1.24265	1	3635.61	1730.01	1413.06	2513.78	2760.13	2374.49
B	At4g33710	^ ^endomembrane system^ ^pathogenesis-related protein, putative similar to PR-1a protein [Nicotiana tabacum] GI:19944; contains Pfam profile PF00188: SCP-like extracellular protein^	1.29212	0.000626654	-1.09449	1	1.25791	1	1.29409	1	-1.37192	1	1166.09	1336.65	1248.28	1402.46	1292.84	1017.27
E	At4g33790	^ ^Acyl Lipid Metabolism;mitochondrion^Alcohol-forming Fatty Acyl-Coenzyme A Reductase^acyl CoA reductase, putative similar to acyl CoA reductase [Simmondsia chinensis] GI:5020215; contains Pfam profile PF03015: Male sterility protein; No start codon identified, may contain anomalous splicing at 5' end.^	-2.64523	0.228879	-1.42429	1	1.78816	1.73908e-11	1.87374	0.000651679	1.20029	1	4701.81	2230.52	1640.06	2203.18	3481.98	4648.96
E	At4g34110	^POLY(A)-BINDING PROTEIN 2^Protein synthesis factors;translational initiation^PABP - poly(A) binding protein^polyadenylate-binding protein 2 (PABP2) non-consensus TA donor splice site at exon 2, polyadenylate-binding protein - Triticum aestivum (common wheat),PIR:T06979^	-1.02053	1	1.5739	1	-1.29755	1	-1.32878	1	1.82713	0.00452723	14673.2	10346.5	14346.8	15382.7	17123	21268.7
D	At4g34230	^ATCAD5^ ^ ^cinnamyl-alcohol dehydrogenase, putative similar to cinnamyl alcohol dehydrogenase, Nicotiana tabacum [SP|P30359], Populus deltoides, PATCHX:G288753^	1.01476	1	1.40146	0.00156268	1.26737	1	-1.09509	1	-1.0712	1	2289.34	2766.86	4040.15	5473.2	5320.32	5181.75
C	At4g34420	^ ^ ^ ^expressed protein ; expression supported by MPSS^	-1.09007	1	1.40437	0.00535078	-1.08549	1	-1.14279	1	-1.41913	1	1063.81	1091.78	1353.48	1664.23	1508.26	1373.17
A	At4g34590	^ ^AtbZIP11^ TF ^bZIP^ ^bZIP transcription factor family protein similar to common plant regulatory factor 7 GI:9650828 from [Petroselinum crispum]^	-2.19178	1.49512e-14	-1.11057	1	1.5445	1	-1.53181	1	1.01105	1	8763.97	4482.82	5082.83	6362.9	4901.5	4696.88
B	At4g34620	^RIBOSOMAL PROTEIN S16^EMB;structural constituent of ribosome^Embryo Defective^ribosomal protein S16 family protein ribosomal protein S16, Neurospora crassa, PIR2:A29927^	-2.18192	0.000131372	-1.63708	1	1.07382	1	1.05861	1	-1.32673	1	24845	18931.2	22031.1	18241.5	16309.4	17012.5
A	At4g34710	^ARGININE DECARBOXYLASE 2^arginine decarboxylase activity;arginine spermine degradation;polyamine biosynthesis III^arginine decarboxylase^arginine decarboxylase 2 (SPE2) identical to SP|O23141 Arginine decarboxylase 2 (EC 4.1.1.19) (ARGDC 2) (ADC 2) (ADC-N) {Arabidopsis thaliana}^	-1.75783	0.00213491	-1.33829	0.00624999	1.3308	1	-1.25406	1	-1.03746	1	15524.3	10502.4	9417.04	9194.73	8192.95	9769.27
D	At4g34760	^ ^SAUR^ ^auxin-responsive family protein auxin-induced protein X15, Glycine max, PIR2:JQ1097^	1.35624	0.00878537	1.81173	1.07299e-06	1.54706	1	1.32084	1	1.28506	1	884.643	1023.16	1400.11	2137	2418.67	2633.75
C	At4g34790	^ ^SAUR;chloroplast^ ^auxin-responsive family protein similar to auxin-induced protein X10A (SP:P33080) [Glycine max.] PIR:JQ1099^	1.44804	1	1.51203	0.0146561	1.34815	1	1.07941	1	-1.23846	1	432.024	491.833	563.461	622.366	659.336	519.567
D	At4g34800	^ ^SAUR;mitochondrion^ ^auxin-responsive family protein similar to small auxin-up regulated protein SAUR (GI:3043536) [Raphanus sativus]; small auxin up RNA (SAUR-AC1) (SP:S70188) [Arabidopsis thaliana]^	2.06514	0.000805392	2.12263	6.22697e-06	1.11738	1	1.11727	1	-1.07906	1	523.389	994.031	1720.01	2097.57	2039.05	1756.86
B	At4g34810	^ ^SAUR;chloroplast^ ^auxin-responsive family protein similar to auxin-induced protein X10A5 (SP:P33079) [Glycine max]; small auxin up RNA (SAUR-AC1), Arabidopsis thaliana, PIR2:T06084^	1.37226	1	-1.53216	7.31775e-06	-1.24363	1	1.0233	1	-1.06744	1	307.359	425.822	302.792	201.275	199.255	193.507
B	At4g34970	^ ^actin depolymerizing activity^ ^actin-depolymerizing factor, putative similar to SP|Q9ZNT3 Actin-depolymerizing factor 5 (ADF-5) (AtADF5) {Arabidopsis thaliana}; contains Pfam profile PF00241: Cofilin/tropomyosin-type actin-binding protein^	2.67823	0.000249845	-1.72041	1	-1.59266	1	-1.4136	1	-1.29838	1	211.756	742.274	506.188	338.736	228.777	192.716
C	At4g34990	^ ^AtMYB32^ TF ^MYB-(R1)R2R3^ ^myb family transcription factor (MYB32) similar to myb DNA-binding protein GI:19052 from [Hordeum vulgare]^	-1.07637	1	1.3092	1	-1.02417	1	-1.09464	1	-1.27419	0.0164609	3081.43	3263.1	3755.02	4168.94	4809.27	3558.93
C	At4g35750	^ ^ ^ ^Rho-GTPase-activating protein-related contains weak similarity to Rho-GTPase-activating protein 1 (GTPase-activating protein rhoOGAP) (Rho-related small GTPase protein activator) (CDC42 GTPase-activating protein) (p50-rhoGAP) (Swiss-Prot:Q07960) [Homo sapiens]^	-1.20577	1	1.66288	0.000846786	-1.16869	1	1.1149	1	1.29595	1	19129.4	16784.4	22022.2	19862.8	17513	19569.1
A	At4g35900	^ ^AtbZIP14^ TF ^bZIP^ ^DNA-binding protein-related weak similarity to DNA-binding factor gmlip15 [Zea mays] GI:14289167^	-2.25486	0.0249962	1.17771	1	-1.13362	1	-1.39862	1	-1.34407	1	14469.3	6529.62	6689.55	6717.23	4250.59	3833.89
A	At4g36150	^ ^Pathogen Defense;chloroplast^TNL(TIR-NBS-LRR)^disease resistance protein (TIR-NBS-LRR class), putative domain signature TIR-NBS-LRR exists, suggestive of a disease resistance protein.^	1.03665	1	1.03522	1	-1.22275	1	1.34426	0.0001658	1.10057	1	1824	1710.11	1606.13	1415.77	1766.82	1797.87
D	At4g36540	^BR ENHANCED EXPRESSION2^BHLH058^ TF ^bHLH^bHLH^basic helix-loop-helix (bHLH) family protein contains Pfam domain, PF00010: Helix-loop-helix DNA-binding domain^	1.82795	5.18636e-06	1.21095	1	1.2764	1	1.30353	1	-1.0802	1	528.301	897.99	964.167	1097.29	1396.53	1809.16
E	At4g36640	^ ^ ^ ^SEC14 cytosolic factor family protein / phosphoglyceride transfer family protein similar to polyphosphoinositide binding protein Ssh1p (GI:2739044) {Glycine max, SEC14 cytosolic factor (Phosphatidylinositol/phosphatidylcholine transfer protein) (PI/PCTP) (SP:P24859) [Kluyveromyces lactis] and to SEC14 cytosolic factor (SP:P53989) [Candida glabrata]^	1.0043	1	1.05866	1	1.56134	1	1.76319	0.0114615	1.01095	1	162.016	193.918	263.888	339.713	648.461	798.309
D	At4g36740	^ ^ ^ TF ^HB^HD-Zip I^homeobox-leucine zipper family protein similar to CRHB7 (GP:3868841) {Ceratopteris richardii} and to homeotic protein VAHOX1 (PIR:T07734) [Lycopersicon esculentum]^	-2.11197	1.24007e-11	1.12635	1	1.46335	1	1.11507	1	-1.20282	1	901.672	520.294	726.983	1337.95	1048.23	1045.76
D	At4g36850	^ ^ ^ ^PQ-loop repeat family protein / transmembrane family protein similar to SP|Q10482 Seven transmembrane protein 1 {Schizosaccharomyces pombe}; contains Pfam profile PF04193: PQ loop repeat^	-2.37309	0.000105288	5.65304	7.86332e-35	1.66256	1	1.11749	1	-1.46451	1	1284.34	868.772	3204.27	4379.92	4672.96	3270.54
D	At4g36920	^APETALA2^ ^ TF ^AP2/ERF^AP2^floral homeotic protein APETALA2 (AP2) Identical to (SP:P47927) Floral homeotic protein APETALA2. [Mouse-ear cress] {Arabidopsis thaliana}^	2.46685	7.9791e-11	1.21699	1	1.04696	1	1.03994	1	-1.01819	1	3108.55	6088.8	8302.3	10582.1	11141.9	11684.4
E	At4g36925	^ ^ ^ ^expressed protein ^	1.5276	1	-1.62805	1	1.00095	1	1.74	0.00123373	1.01082	1	1216.48	1673.83	1091.89	1157.16	1695.23	1731.19
B	At4g36990	^ ^AtHsfB1^ TF ^HSF^ ^heat shock factor protein 4 (HSF4) / heat shock transcription factor 4 (HSTF4) identical to heat shock transcription factor 4 (HSF4) SP:Q96320 from [Arabidopsis thaliana]^	1.16939	1	-1.07139	1	-1.16501	1	-1.24398	0.01578	-1.11346	1	5895.79	6786.88	5031.87	4368.46	4132.9	3450.24
E	At4g37080	^ ^ATP binding activity^ ^expressed protein contains Pfam profile PF04784: Protein of unknown function, DUF547^	-1.19203	1	1.14541	1	-1.00296	1	1.54045	1.71978e-07	1.23172	1	2546.27	2145.13	2109.37	2201.75	3313.76	4915.82
A	At4g37180	^ ^ ^ TF ^GARP^ ^myb family transcription factor contains Pfam domain, PF00249: Myb-like DNA-binding domain^	-1.45965	3.48718e-05	-1.30995	0.78708	-1.0091	1	-1.2478	1	-1.15177	1	4770.56	2893.92	2440.34	2469.77	1823.81	1671.49
C	At4g37240	^ ^ ^ ^expressed protein ^	1.22281	1	1.1108	1	1.16335	1	1.01387	1	-1.86296	9.4387e-08	9071.85	11280.9	11613.5	11710.5	10171.9	7845.62
A	At4g37280	^ ^chromatin binding activity^ ^MRG family protein contains Pfam domain PF05712: MRG^	-1.13401	1	1.15402	1	-1.13477	1	-1.26417	1	2.0743	0.0482278	4721.75	3485.74	3932.83	3423.44	3069.76	4067.38
E	At4g37310	^ ^Cytochrome P450;cytochrome P450 activity^CYP81H^cytochrome P450, putative ^	-1.61031	1	1.22191	1	1.07765	1	1.49855	0.0153326	1.41607	1	130.006	109.389	173.348	205.333	287.244	355.709
D	At4g37330	^ ^Cytochrome P450;cytochrome P450 activity^CYP81D^cytochrome P450 family protein ^	-1.00298	1	1.09879	1	1.31463	0.00770704	1.22761	1	1.44769	1	1635.57	1842.63	2172.83	3033.66	3072.82	3871.76
D	At4g37390	^ ^Acyl-activating enzymes (AAE);auxin inducible^Clade III^auxin-responsive GH3 family protein similar to auxin-responsive GH3 product [Glycine max] GI:18591; contains Pfam profile PF03321: GH3 auxin-responsive promoter^	-1.07233	1	1.47569	1	2.31487	1.07027e-08	1.59627	1	1.00029	1	829.753	875.638	1143.79	2623.61	4686.2	5368.65
C	At4g37400	^ ^Cytochrome P450;cytochrome P450 activity^CYP81F^cytochrome P450 family protein similar to cytochrome P450 monooxygenase CYP91A2, Arabidopsis thaliana, D78607^	3.03388	4.19504e-29	1.77368	0.26297	1.0636	1	-1.00217	1	-1.02027	1	248.945	728.39	1080.63	1005.35	814.577	697.255
B	At4g37520	^ ^Class III peroxidase;endomembrane system^ ^peroxidase 50 (PER50) (P50) (PRXR2) identical to SP|Q43731 Peroxidase 50 precursor (EC 1.11.1.7) (Atperox P50) (PRXR2) (ATP9a)] {Arabidopsis thaliana}^	1.2053	1	-1.10249	1	-1.20794	1	-1.61995	0.0211584	-1.12395	1	522.595	655.316	555.218	419.211	292.828	249.271
A	At4g37540	^ ^ASL41/LBD39^ TF ^AS2/LOB^Class II^LOB domain protein 39 / lateral organ boundaries domain protein 39 (LBD39) identical to SP|Q9SZE8 LOB domain protein 39 {Arabidopsis thaliana}^	-2.68209	1	-1.58962	1	1.63365	1	-2.11185	1.04955e-05	-1.53345	0.237318	10540.2	5461.39	2751.09	3131.22	1728.86	1239.92
A	At4g37550	^ ^formamidase activity^ ^formamidase, putative / formamide amidohydrolase, putative similar to SP|Q50228 Formamidase (EC 3.5.1.49) (Formamide amidohydrolase) {Methylophilus methylotrophus}; contains Pfam profile PF03069: Acetamidase/Formamidase family^	-1.66499	0.000642428	-1.06247	1	1.21416	1	-1.29016	0.00488992	1.51901	1	2570.24	2052.64	1870.2	1987.15	1863.15	2652.91
B	At4g37570	^ ^mitochondrion^ ^hypothetical protein contains Pfam profile PF03778: Protein of unknown function (DUF321)^	1.14537	1	-1.012	1	-1.70434	1	-1.71142	7.19207e-05	-1.00953	1	477.658	692.283	611.539	504.939	399.301	429.938
A	At4g37610	^ ^Transcriptional Adaptor Zinc Bundle (TAZ) domain family;transcription cofactor activity^ ^TAZ zinc finger family protein / BTB/POZ domain-containing protein contains Pfam PF00651 : BTB/POZ domain; contains Pfam PF02135 : TAZ zinc finger; similar to Speckle-type POZ protein (SP:O43791) [Homo sapiens]^	-3.65782	2.36964e-07	-1.14159	1	1.24389	1	-1.15924	1	1.11635	1	254.791	160.856	153.267	176.412	149.824	139.54
B	At4g37685	^ ^ ^ ^hypothetical protein ^	1.55197	1.68649e-05	-1.23152	1	-1.08203	1	1.25561	1	-1.1989	1	1368.94	1858.98	1440	1366.75	1837.72	1764.56
C	At4g37740	^ ^AtGRF2^ TF ^GRF/ENBP (C3H-type 2; Zn)^GRF-like^expressed protein identical to transcription activator GRL2 [Arabidopsis thaliana] GI:21539882 (unpublished); supporting cDNA gi|21539881|gb|AY102635.1|^	1.53706	0.145642	1.13735	1	-1.0655	1	-1.58201	1.01677e-11	1.04644	1	2297.65	3492.87	5206.61	5033.36	3030.83	2658.32
C	At4g37800	^ ^ Assembly, Architecture, and Growth;Glycoside Hydrolase Family 16;Glycoside Hydrolase Gene Families;endomembrane system ^Growth modifying proteins;Glycoside Hydrolase Family 16^xyloglucan:xyloglucosyl transferase, putative / xyloglucan endotransglycosylase, putative / endo-xyloglucan transferase, putative similar to N-terminal partial sequence of endo-xyloglucan transferase GI:2244732 from [Go…	1.70015	8.8628e-12	1.31018	1	1.46935	1	1.67811	0.060314	-1.36393	0.78471	1273.68	2337.93	2884.84	3278.52	3700.94	2720.65
E	At4g37980	^ELICITOR-ACTIVATED GENE 3^benzyl alcohol dehydrogenase activity^ ^mannitol dehydrogenase, putative (ELI3-1) identical to GI:16267^	-1.04198	1	1.30365	1	2.02511	1	6.84761	4.77339e-10	3.58951	1.02035e-06	47.2775	55.8087	50.4567	122.882	945.966	2335.51
E	At4g38200	^ ^guanyl-nucleotide exchange factor activity^ ^guanine nucleotide exchange family protein similar to Brefeldin A-inhibited guanine nucleotide-exchange protein 2 [Homo sapiens] SP|Q9Y6D5; contains Pfam profile PF01369: Sec7 domain^	-1.00102	1	1.12085	1	1.00628	1	1.18102	1	1.43702	0.00172858	2672.74	2626.11	2386.44	2071.94	2503.87	3650.79
C	At4g38400	^ARABIDOPSIS THALIANA EXPANSIN-LIKE A2^ Assembly, Architecture, and Growth;Expansins;molecular_function unknown ^Growth modifying proteins;EXPANSIN-LIKE^expansin family protein (EXPL2) contains Pfam profile: PF01357 pollen allergen; expansin-like gene, PMID:11641069, www.bio.psu.edu/expansins^	1.53369	1.21036e-06	1.08512	1	1.04715	1	-1.26942	1	-1.4413	1	3481.8	5028.75	4410.57	4791.01	4360.76	3367.76
E	At4g38770	^PROLINE-RICH PROTEIN 4^cell wall^ ^proline-rich family protein (PRP4) similar to proline-rich protein [Arabidopsis thaliana] gi|6782442|gb|AAF28388; contains proline-rich extensin domains, INTERPRO:IPR002965^	1.28327	1	-1.04361	1	1.79756	0.000877932	1.49578	1	7.45902	3.09906e-12	586.735	687.686	807.022	1305.82	2333.7	12362.9
E	At4g38840	^ ^SAUR;mitochondrion^ ^auxin-responsive protein, putative auxin-inducible SAUR gene, Raphanus sativus,AB000708^	-1.35857	1	-1.3511	1	1.98772	0.206505	1.94131	0.00359666	1.00452	1	1003.91	629.968	470.415	670.13	937.828	1157.54
D	At4g38860	^ ^SAUR;mitochondrion^ ^auxin-responsive protein, putative auxin-induced protein 10A, Glycine max., PIR2:JQ1099^	1.48019	1	1.08274	1	1.0711	1	1.89367	5.52731e-15	1.40163	1	352.208	581.151	660.713	592.094	778.473	814.888
B	At4g39170	^ ^ ^ ^SEC14 cytosolic factor, putative / phosphoglyceride transfer protein, putative similar to phosphatidylinositol transfer-like protein IV (GI:14486707) [Lotus japonicus] and phosphatidylinositol-phosphatidylcholine transfer protein SEC14, Yarrowia lipolytica, PIR2:S43745;contains Pfam PF00650 : CRAL/TRIO domain; contains Pfam PF03765 : CRAL/TRIO, N-terminus^	1.61017	0.000186636	-1.12513	1	1.04294	1	1.08034	1	1.01978	1	3900.01	6069.39	5148.89	4449.91	5071	4802.21
A	At4g39480	^ ^Cytochrome P450;cytochrome P450 activity^CYP96A^cytochrome P450 family protein contains Pfam profile: PF00067 cytochrome P450^	-1.49408	0.0371429	1.08079	1	1.04352	1	-1.54384	1	1.01887	1	2881.67	2013.71	2136.24	2620.48	2018.36	2615.5
A	At4g39510	^ ^Cytochrome P450;cytochrome P450 activity^CYP96A^cytochrome P450 family protein contains Pfam PF00067: Cytochrome P450; similar to Cytochrome P450 86A2 (SP:O23066) [Arabidopsis thaliana]^	-2.88567	3.54259e-13	-1.26792	1	1.47103	1	-1.16013	1	1.10098	1	13316.3	6174	5112.44	5781.07	4441.18	5069.49
A	At4g39780	^ ^ ^ TF ^AP2/ERF^ERF-EREBP^AP2 domain-containing transcription factor, putative similar to AP2 domain containing protein RAP2.4,Arabidopsis thaliana^	-1.79143	7.31197e-05	1.191	1	1.1809	1	-1.02459	1	-1.03639	1	351.492	218.066	329.035	367.074	372.831	320.777
E	At4g39940	^ADENOSINE-5'-PHOSPHOSULFATE-KINASE^kinase activity;sulfate assimilation pathway;sulfate assimilation 2;APS pathway of sulfate reduction^ADENOSINE-5-PHOSPHOSULFATE-KINASE^adenylylsulfate kinase 2 (AKN2) identical to adenylylsulfate kinase 2, chloroplast precursor (APS kinase, Adenosine-5'phosphosulfate kinase, ATP adenosine-5'- phosphosulfate 3'-phosphotransferase) [Arabidopsis thaliana] SWISS-PR…	-1.97993	6.48991e-11	1.94416	0.00881451	1.27369	1	1.57116	0.52438	1.07875	1	1275.06	854.125	1101.49	1478.15	1769.46	1967.56
E	At4g39950	^ ^Cytochrome P450;chloroplast;auxin biosynthesis^CYP79B;CYP79B2^cytochrome P450 79B2, putative (CYP79B2) identical to cytochrome P450 (79B2) SP:O81346 from [Arabidopsis thaliana]^	-1.74088	1	1.94658	0.0173492	1.00006	1	1.85445	1	1.42365	1	149.546	100.169	217.482	219.812	425.229	617.074
A	At5g01015	^ ^endomembrane system^ ^expressed protein ^	-2.49305	0	-1.16582	1	1.44739	0.18111	1.26518	1	1.1293	1	2807.08	1156.11	1080.17	1415.25	1547.72	1509.82
D	At5g01040	^ ^OFeT(Oxidase-dependent Fe2+ Transporter);endomembrane system^ ^laccase family protein / diphenol oxidase family protein similar to laccase [Pinus taeda][GI:13661201], lac110 laccase, Populus trichocarpa, EMBL:PTY13773^	1.05975	1	1.49113	0.0359203	1.23594	1	-1.03698	1	-1.1938	1	588.874	666.182	800.868	844.567	984.711	846.503
D	At5g01075	^ ^endomembrane system^ ^expressed protein ^	1.14527	1	1.24765	1	1.75824	0.0104682	1.22016	1	-1.13881	1	4246.39	4444.99	5587.41	8735.8	9949.1	9714.42
C	At5g01200	^ ^ ^ TF ^MYB-related^ ^myb family transcription factor contains PFAM profile: PF00249 myb-like DNA binding domain^	2.46329	4.01283e-10	-1.15877	1	1.05635	1	1.00858	1	-1.16393	1	4676.85	10341	8895.88	8220.73	8541.14	7738.05
D	At5g01220	^SULFOQUINOVOSYLDIACYLGLYCEROL 2^Glycosyltransferase Family 4;Glycosyltransferase Gene Families;UDP-glycosyltransferase activity^Glycosyltransferase- Family 4^UDP-sulfoquinovose:DAG sulfoquinovosyltransferase / sulfolipid synthase (SQD2) identical to GI:20302857^	1.05172	1	2.70009	0.0288	1.05378	1	-1.05605	1	1.37655	1	1717.94	1895.84	3702.58	4560.51	4577.12	4891.13
C	At5g01260	^ ^Carbohydrate-Binding Module Family 20;enzyme activity^ ^glycoside hydrolase starch-binding domain-containing protein low similarity to SP|P31797 Cyclomaltodextrin glucanotransferase precursor (EC 2.4.1.19) (Cyclodextrin-glycosyltransferase) (CGTase) {Bacillus stearothermophilus}; contains Pfam profile PF00686: Starch binding domain^	-1.2565	1	1.63038	0.060954	1.0097	1	-1.08246	1	1.56698	9.74514e-10	1434.15	1365.05	1636.77	1871.59	1541.21	1935.64
B	At5g01400	^ ^mitochondrion^ ^expressed protein contains low similarity to symplekin SP:Q92797 from [Homo sapiens]^	1.03848	1	1.13768	1	-1.33283	1	1.21583	1	2.06239	0.00040086	3888.93	3601.92	4050.45	3387.95	3013.13	3900.5
C	At5g01520	^ ^ ^ ^zinc finger (C3HC4-type RING finger) family protein similar to MTD2 [Medicago truncatula] GI:9294812; contains Pfam profile PF00097: Zinc finger, C3HC4 type (RING finger)^	2.53739	0.0128686	1.1529	1	-1.00371	1	-1.22973	1	-1.24402	1	228.451	546.406	507.346	462.273	372.011	408.075
E	At5g01570	^ ^ ^ ^hypothetical protein hypothetical protein T16O11.19 - Arabidopsis thaliana, EMBL:AC010871^	-1.27324	1	1.05817	1	1.19849	1	1.87884	0.000196808	1.07453	1	3143.41	2776.91	2961.48	3499.83	5401.77	6348.83
D	At5g01600	^ ^iron ion transport^ ^ferritin 1 (FER1) identical to ferritin [Arabidopsis thaliana] GI:1246401, GI:8163920^	1.07673	1	1.65589	0.0272219	1.35235	1	1.85571	0.00702825	1.11664	1	1628.45	1624.04	2683.65	3230.81	4566.75	5222.94
E	At5g01610	^ ^ ^ ^expressed protein contains Pfam profile PF04398: Protein of unknown function, DUF538^	1.4574	1	1.10389	1	1.30581	1	2.02565	1.87652e-12	1.31495	1	108.689	150.874	225.288	349.607	769.249	1100.1
C	At5g01840	^ ^ ^ ^ovate family protein 59% similar to ovate protein (GI:23429649) [Lycopersicon esculentum]; contains TIGRFAM TIGR01568 : uncharacterized plant-specific domain TIGR01568^	1.0279	1	1.29607	1	1.09423	1	-1.51745	4.93062e-09	-1.22815	1	1289.24	1577.69	1876.77	2086.79	1377.87	1158.52
D	At5g01870	^ ^Acyl Lipid Metabolism;endomembrane system^Lipid Transfer Protein type 1^lipid transfer protein, putative similar to lipid transfer protein 6 from Arabidopsis thaliana [gi:8571927]; contains Pfam protease inhibitor/seed storage/LTP family domain PF00234^	-1.48508	0.51916	1.087	1	2.65364	0.0103623	1.41828	1	-1.16401	1	941.985	714.546	734.32	1686.74	2208.15	2259.31
A	At5g02170	^ ^AAAP(Amino Acid/Auxin Permease);AAAP family;amino acid permease activity^ ^amino acid transporter family protein belongs to INTERPRO:IPR002422 amino acid/polyamine transporter, family II^	-1.36173	1	-1.74104	0.0301177	1.06996	1	-1.27854	1	-1.04185	1	102.788	87.8465	85.4487	107.443	91.9736	80.7394
C	At5g02270	^ ^ABC(ATP-Binding Cassette);ABC Superfamily;transporter activity^NAP subfamily^ABC transporter family protein NBD-like protein POP, Arabidopsis thaliana, EMBL:AF127664^	-1.05941	1	1.30462	1	1.39821	0.0199125	-1.01289	1	-1.13994	1	5357.5	5797.79	6862.54	9208.45	8115.91	6779.56
D	At5g02620	^ ^Ankyrin-like protein family^ ^ankyrin repeat family protein contains ankyrin repeat domains, Pfam:PF00023^	1.03018	1	-1.01321	1	1.22977	1	1.56684	0.000934815	-1.21422	1	2228.11	2270.59	2257.26	2937.28	3687.23	3429.33
A	At5g02750	^ ^C3H zinc finger family;chloroplast^ ^zinc finger (C3HC4-type RING finger) family protein contains Pfam profile: PF00097 zinc finger, C3HC4 type (RING finger)^	-1.37337	0.00195379	-1.16166	1	-1.01987	1	-1.15533	1	1.06571	1	798.258	611.21	600.938	551.39	390.007	474.915
D	At5g02890	^ ^ ^ ^transferase family protein contains Pfam profile PF02458: Transferase family^	1.00976	1	1.35557	0.0446076	1.17834	1	-1.04701	1	-1.16562	1	2995.8	3585.8	5047.27	5921.55	6400.81	5961.23
E	At5g02940	^ ^protein serine/threonine kinase activity^ ^expressed protein ^	1.02022	1	1.24689	1	-1.26207	1	-1.20898	1	3.08687	7.4844e-18	2711.48	3131.42	3834.41	2750.75	3575.89	4751.51
A	At5g03150	^ ^ ^ TF ^C2H2 (Zn)^ ^zinc finger (C2H2 type) family protein contains Pfam domain, PF00096: Zinc finger, C2H2 type^	-1.54779	0.00409703	-1.08845	1	-1.09916	1	-1.25196	1	-1.26477	1	4690.64	3350.79	2964.5	2653.56	1740.69	1595.28
D	At5g03170	^ ^GPI-anchored protein;Structural proteins;endomembrane system^Fasciclin-like AGPs (FLAs);Fasciclin-like AGP group^fasciclin-like arabinogalactan-protein (FLA11) ^	-1.18058	1	1.60779	0.52544	1.68417	3.09314e-06	-1.06447	1	-1.15325	1	969.667	672.294	1109.76	1880.02	1552.23	1131.1
E	At5g03350	^ ^protein kinase activity^ ^legume lectin family protein contains Pfam domain, PF00139: Legume lectins beta domain^	-1.79341	2.28197e-06	1.17903	1	1.55605	0.0086103	1.09315	1	1.1801	1	5091.56	2903.43	3714.51	5461.25	5571.26	7189.45
C	At5g03410	AT5G03410_1 DPB transcription factor supported by full-length cDNA Ceres 206791.	-1.14257	1	1.04121	1	-1.22036	1	-1.28038	1	1.64229	7.29333e-06	1534.91	1543.81	2231.33	2031.16	2004.13	1709.58
B	At5g03455	^ ^mitochondrion^ ^rhodanese-like domain-containing protein contains Rhodanese-like domain PF:00581^	1.08323	1	-1.2441	1	-1.33471	0.0323727	-1.04781	1	-1.08443	1	9168.13	10521.3	10329.2	8601.9	8258.04	6791.39
B	At5g03520	^ ^small GTPase(RAB);two-component signal transduction system (phosphorelay)^ ^Ras-related GTP-binding protein, putative similar to GTP-binding protein GI:871508 from [Pisum sativum]^	-1.1867	1	1.62947	0.0277494	1.0543	1	-1.09461	1	-1.13184	1	11069.3	8457.48	11209.8	11327.3	9481.15	9011.52
E	At5g03760	^RESISTANT TO AGROBACTERIUM TRANSFORMATION 4^Cellulose-synthase-like genes ;Glycosyltransferase Family 2;Glycosyltransferase Gene Families;Putative glucosyltransferase family;cellulose synthase activity^CSLA;Glycosyltransferase- Family 2^glycosyl transferase family 2 protein similar to beta-(1-3)-glucosyl transferase GB:AAC62210 GI:3687658 from [Bradyrhizobium japonicum], cellulose synthase from …	-1.74675	4.12838e-06	1.24474	1	1.13206	1	1.66844	0.029264	1.03606	1	1753.5	1179.96	1139.67	1446.76	2201.82	2320.42
E	At5g03790	^ ^ ^ TF ^HB^HD-Zip I^homeobox-leucine zipper family protein similar to homeobox-leucine zipper protein Athb-7 (SP:P46897) [Arabidopsis thaliana]; contains Pfam PF00046: Homeobox domain^	-1.7716	5.03443e-07	1.15503	1	2.82546	6.36126e-18	2.27785	4.94449e-23	1.3095	1	798.51	458.799	622.066	1707.9	3287.37	4128.3
B	At5g03830	^ ^mitochondrion^ ^expressed protein hypothetical protein F4I1.32, Arabidopsis thaliana, PIR:T02406^	-1.07683	1	1.22704	1	-1.63907	0.00428002	1.16962	1	2.0076	0.0427113	1112.48	1229.83	1138.31	749.638	774.927	713.979
[truncated: 337 more rows]
