# Supplementary material for: Genome-Wide Analysis of Gene Expression during Early Arabidopsis Flower Development
Source: PLoS Genet. 2006 Jul 28;2(7):e117. doi: 10.1371/journal.pgen.0020117 (PMC1523247; doi:10.1371/journal.pgen.0020117)
Supplement: Table S4 — Gene identifiers and gene descriptions are listed. (20 KB XLS) [file pgen.0020117.st004.xls]

## Sheet: GA
Gene Identifier	Gene Description
At1g74670	^ ^GA^ ^gibberellin-responsive protein, putative similar to SP|P46690 Gibberellin-regulated protein 4 precursor {Arabidopsis thaliana} GASA4; contains Pfam profile PF02704: Gibberellin regulated protein^
At1g30040	^ ^GA^putative gibberellin 2-oxidase^gibberellin 2-oxidase / GA2-oxidase (GA2OX2) identical to GI:4678368 ga2ox2^
At1g78440	^ ^GA^putative gibberellin 2-oxidase^gibberellin 2-oxidase / GA2-oxidase (GA2OX1) identical to gibberellin 2- oxidase ga2ox1 [GI:4678366] from [Arabidopsis thaliana]^
At4g21690	^ ^GA^putative gibberellin 3-beta-hydroxylase^gibberellin 3 beta-hydroxylase family protein similar to gibberellin 3 beta-hydroxylase [GI:4164145][Lactuca sativa], 3b-hydroxylase, Solanum lycopersicum, AB010992; contains PF03171 2OG-Fe(II) oxygenase superfamily domain^
At2g14900	^ ^endomembrane system^ ^gibberellin-regulated family protein similar to SP|P46690 Gibberellin-regulated protein 4 precursor {Arabidopsis thaliana} GASA4; contains Pfam profile PF02704: Gibberellin regulated protein^
At5g14920	^ ^endomembrane system^ ^gibberellin-regulated family protein similar to SP|P46689 Gibberellin-regulated protein 1 precursor {Arabidopsis thaliana}; contains Pfam profile PF02704: Gibberellin regulated protein^
At3g03450	^RGA-LIKE2^ ^ TF ^GRAS^ ^gibberellin response modulator, putative / gibberellin-responsive modulator, putative similar to GAI (GI:2569938), RGA1 (GB:AAC67333) and RGA2 (GI:2339980) [Arabidopsis thaliana]; possible involvement in nitrogen metabolism^
At1g14920	^GA INSENSITIVE/RGA2^ ^ TF ^GRAS^ ^gibberellin response modulator (GAI) (RGA2) / gibberellin-responsive modulator identical to GAI GB:CAA75492 GI:2569938 [Arabidopsis thaliana] (Genes Dev. In press)^
At4g21200	^ ^ ^ ^oxidoreductase, 2OG-Fe(II) oxygenase family protein similar to gibberellin 20-oxidase from A. thaliana [gi:1109699], Phaseolis vulgaris [gi:2262201]; contains Pfam domain PF03171, 2OG-Fe(II) oxygenase superfamily^
At4g23340	^ ^receptor activity^ ^oxidoreductase, 2OG-Fe(II) oxygenase family protein similar to gibberellin c20-oxidase [Pisum sativum] GI:6855711; contains Pfam profile PF03171: oxidoreductase, 2OG-Fe(II) oxygenase family^
At5g58660	^ ^biosynthesis^ ^oxidoreductase, 2OG-Fe(II) oxygenase family protein similar to ACC oxidase, Lycopersicon esculentum [SP|P05116], gibberellin 3B-hydroxylase, Latuca sativa [gi:4164145]; contains Pfam domain PF03171, 2OG-Fe(II) oxygenase superfamily^

## Sheet: Auxin
Gene ID	Gene Description
At2g38120	^AUXIN RESISTANT 1^auxin;AAAP(Amino Acid/Auxin Permease);Organic Solute Cotransporters;AAAP family;amino acid permease activity^auxin influx carrier;AUX1 family^amino acid permease, putative (AUX1) identical to AUX1 GI:1531758 from [Arabidopsis thaliana]^
At2g28085	^ ^ ^ ^auxin-responsive family protein similar to auxin-induced protein TGSAUR22 (GI:10185820) [Tulipa gesneriana]^
At4g12980	^ ^ ^ ^auxin-responsive protein, putative similar to auxin-induced protein AIR12 GI:11357190 [Arabidopsis thaliana]^
At4g32540	^YUCCA^auxin biosynthesis^ ^flavin-containing monooxygenase / FMO (YUCCA) identical to gi:16555352^
At1g19830	^ ^SAUR^ ^auxin-responsive protein, putative similar to auxin-induced protein TGSAUR21 (GI:10185818) [Tulipa gesneriana]^
At2g46690	^ ^SAUR^ ^auxin-responsive family protein similar to indole-3-acetic acid induced protein ARG7 (SP:P32295) [Phaseolus aureus]^
At4g34760	^ ^SAUR^ ^auxin-responsive family protein auxin-induced protein X15, Glycine max, PIR2:JQ1097^
At5g20810	^ ^SAURs^ ^auxin-responsive protein, putative / small auxin up RNA (SAUR_B) similar to indole-3-acetic acid induced protein ARG7 SP:P32295 from [Phaseolus aureus]^
At1g70940	^PIN-FORMED 3^auxin;AEC(Auxin Efflux Carrier);Organic Solute Cotransporters;plasma membrane^auxin efflux carrier;Similarity to auxin transport protein family^auxin transport protein, putative (PIN3) similar to auxin transport protein [Arabidopsis thaliana] gi|5817301|gb|AAD52695^
At1g73590	^PIN-FORMED 1^auxin;AEC(Auxin Efflux Carrier);Organic Solute Cotransporters;transporter activity^auxin efflux carrier;Similarity to auxin transport protein family^auxin efflux carrier protein, putative (PIN1) identical to putative auxin efflux carrier protein; AtPIN1 [Arabidopsis thaliana] GI:4151319; contains Pfam profile PF03547: Auxin Efflux Carrier^
At2g01420	^PIN-FORMED 4^auxin;EMB;AEC(Auxin Efflux Carrier);Organic Solute Cotransporters;transporter activity^auxin efflux carrier;Embryo Defective;Similarity to auxin transport protein family^auxin transport protein, putative similar to auxin transport protein PIN7[Arabidopsis thaliana] gi|5817305|gb|AAD52697^
At5g57090	^AGRAVITROPIC^auxin;AEC(Auxin Efflux Carrier);Organic Solute Cotransporters;gravitropism^auxin efflux carrier;Similarity to auxin transport protein family^auxin transport protein (EIR1) identical to auxin transport protein EIR1 [Arabidopsis thaliana] gi|3377507|gb|AAC39513; identical to root gravitropism control protein [Arabidopsis thaliana] gi|4322486|gb|AAD16060^
At1g72430	^ ^chloroplast^ ^auxin-responsive protein-related similar to auxin-induced protein TGSAUR22 (GI:10185820) [Tulipa gesneriana]^
At1g23080	^PIN-FORMED 7^AEC(Auxin Efflux Carrier);Organic Solute Cotransporters;transporter activity^Similarity to auxin transport protein family^auxin efflux carrier protein, putative similar to efflux carrier of polar auxin transport [Brassica juncea] gi|12331173|emb|CAC24691^
At1g77110	^PIN-FORMED 6^AEC(Auxin Efflux Carrier);Organic Solute Cotransporters;transporter activity^Similarity to auxin transport protein family^auxin transport protein, putative similar to auxin transport protein EIR1 GI:3377507 from [Arabidopsis thaliana]^
At1g25530	^ ^AAAP(Amino Acid/Auxin Permease);Organic Solute Cotransporters;AAAP family;amino acid permease activity^Amino acid permease family^lysine and histidine specific transporter, putative similar to lysine and histidine specific transporter GI:2576361 from [Arabidopsis thaliana]; contains Pfam profile PF01490: Transmembrane amino acid transporter protein^
At1g44100	^ ^AAAP(Amino Acid/Auxin Permease);Organic Solute Cotransporters;AAAP family;amino acid permease activity^Amino acid permease family^amino acid permease 5, putative (AAP5) nearly identical to amino acid permease (AAP5) GI:608673 from [Arabidopsis thaliana]^
At1g77380	^ ^AAAP(Amino Acid/Auxin Permease);Organic Solute Cotransporters;AAAP family;amino acid permease activity^Amino acid permease family^amino acid carrier, putative / amino acid permease, putative strong similarity to amino acid carrier GI:3293031 from [Ricinus communis]; contains Pfam profile PF01490: Transmembrane amino acid transporter protein; identical to cDNA AAP3 (Amino Acid Permease) GI:3970…
At1g80510	^ ^AAAP(Amino Acid/Auxin Permease);AAAP family;amino acid permease activity^ ^amino acid transporter family protein similar to amino acid transporter system N2 [Rattus norvegicus] GI:14578932; contains Pfam profile PF01490: Transmembrane amino acid transporter protein^
At5g02170	^ ^AAAP(Amino Acid/Auxin Permease);AAAP family;amino acid permease activity^ ^amino acid transporter family protein belongs to INTERPRO:IPR002422 amino acid/polyamine transporter, family II^
At4g34790	^ ^SAUR;chloroplast^ ^auxin-responsive family protein similar to auxin-induced protein X10A (SP:P33080) [Glycine max.] PIR:JQ1099^
At4g34810	^ ^SAUR;chloroplast^ ^auxin-responsive family protein similar to auxin-induced protein X10A5 (SP:P33079) [Glycine max]; small auxin up RNA (SAUR-AC1), Arabidopsis thaliana, PIR2:T06084^
At1g29460	^ ^SAUR;mitochondrion^ ^auxin-responsive protein, putative similar to auxin-induced protein 6B (SP:P33083) [Glycine max]^
At1g29500	^ ^SAUR;mitochondrion^ ^auxin-responsive protein, putative similar to auxin-induced protein 6B (SP:P33083) [Glycine max]^
At1g56150	^ ^SAUR;mitochondrion^ ^auxin-responsive family protein similar to SP:P33082 Auxin-induced protein X15. [Soybean] {Glycine max}^
At3g12830	^ ^SAUR;mitochondrion^ ^auxin-responsive family protein similar to auxin-induced protein (SP:P33082) [Glycine max]^
At4g34800	^ ^SAUR;mitochondrion^ ^auxin-responsive family protein similar to small auxin-up regulated protein SAUR (GI:3043536) [Raphanus sativus]; small auxin up RNA (SAUR-AC1) (SP:S70188) [Arabidopsis thaliana]^
At4g38840	^ ^SAUR;mitochondrion^ ^auxin-responsive protein, putative auxin-inducible SAUR gene, Raphanus sativus,AB000708^
At4g38860	^ ^SAUR;mitochondrion^ ^auxin-responsive protein, putative auxin-induced protein 10A, Glycine max., PIR2:JQ1099^
At3g17600	^ ^IAA31^ TF ^Aux/IAA^ ^auxin-responsive protein, putative similar to SP|O24410 Auxin-responsive protein IAA20 (Indoleacetic acid-induced protein 20) {Arabidopsis thaliana}; contains Pfam profile: PF02309: AUX/IAA family^
At1g04250	^AXR3^IAA17^ TF ^Aux/IAA^ ^auxin-responsive protein / indoleacetic acid-induced protein 17 (IAA17) Identical to SP|P93830 Auxin-responsive protein IAA17 (Indoleacetic acid-induced protein 17) {Arabidopsis thaliana}; ESTs gb|H36782 and gb|F14074 come from this gene^
At4g39950	^ ^Cytochrome P450;chloroplast;auxin biosynthesis^CYP79B;CYP79B2^cytochrome P450 79B2, putative (CYP79B2) identical to cytochrome P450 (79B2) SP:O81346 from [Arabidopsis thaliana]^
At3g44320	^NITRILASE 3^nitrilase activity;auxin biosynthesis^ ^nitrilase 3 (NIT3) identical to SP|P46010 Nitrilase 3 (EC 3.5.5.1) {Arabidopsis thaliana}^
At4g37390	^ ^Acyl-activating enzymes (AAE);auxin inducible^Clade III^auxin-responsive GH3 family protein similar to auxin-responsive GH3 product [Glycine max] GI:18591; contains Pfam profile PF03321: GH3 auxin-responsive promoter^
At5g09220	^AMINO ACID PERMEASE 2^AAAP(Amino Acid/Auxin Permease);Organic Solute Cotransporters;AAAP family;amino acid permease activity^Amino acid permease family^amino acid permease 2 (AAP2) identical to amine acid permease AAP2 [Arabidopsis thaliana] GI:510236^
At1g04240	^SHORT HYPOCOTYL2^IAA3^ TF ^Aux/IAA^ ^auxin-responsive protein / indoleacetic acid-induced protein 3 (IAA3) identical to SP|Q38822 Auxin-responsive protein IAA3 (Indoleacetic acid-induced protein 3) {Arabidopsis thaliana}; EST gb|T04296 comes from this gene^
At1g48660	^ ^Acyl-activating enzymes (AAE)^Clade III^auxin-responsive GH3 family protein similar to auxin-responsive GH3 product [Glycine max] GI:18591; contains Pfam profile PF03321: GH3 auxin-responsive promoter^
At1g58360	^NEUTRAL AMINO ACID TRANSPORTER 2^AAAP(Amino Acid/Auxin Permease);Organic Solute Cotransporters;AAAP family;plasma membrane^Amino acid permease family^amino acid permease I (AAP1) identical to amino acid permease I GI:22641 from [Arabidopsis thaliana]^
At2g21210	^ ^Nitrate Metabolism;SAUR;mitochondrion^NO3resp-Aux-ind^auxin-responsive protein, putative similar to small auxin-up regulated protein SAUR (GI:3043536) [Raphanus sativus]^
At4g03400	^DWARF IN LIGHT 2^Acyl-activating enzymes (AAE);electron transporter activity^Clade III^auxin-responsive GH3 family protein similar to auxin-responsive GH3 product [Glycine max] GI:18591; contains Pfam profile PF03321: GH3 auxin-responsive promoter^
